# Supplementary material for: Pseudeurglobosins A–F, six rearranged [11]-chaetoglobosins with immunosuppressive activities from Pseudeurotium bakeri P1-1-1
Source: Royal Society of Chemistry journal article supplement (doi:10.1039/d1qo01357b), 2021-01-01

Electronic Supplementary Material (ESI) for Organic Chemistry Frontiers.  
This journal is © the Partner Organisations 2021

## Supplementary Information

### **Pseudeurglobosins A–F, Six Rearranged [11]- Chaetoglobosins with Immunosuppressive Activities from *Pseudeurotium bakeri* P1-1-1**

Fang-Fang Duan, Ying Gao, Jun-Jun Liu, Lin Liu, Xiao-Gang Peng, and Han-Li Ruan\*

*School of Pharmacy, Tongji Medical College, Hubei Key Laboratory of Natural  
Medicinal Chemistry and Resource Evaluation, Huazhong University of Science and  
Technology, Wuhan 430030, P. R. China*

\*Corresponding author. Tel.: +86 13339986848; E-mail: [ruanhl@hust.edu.cn](mailto:ruanhl@hust.edu.cn)

# Content

|                                                                                                                                                                |    |
|----------------------------------------------------------------------------------------------------------------------------------------------------------------|----|
| Table S1. <sup>1</sup> H (400 MHz) and <sup>13</sup> C NMR data (100 MHz) for 1–2 .....                                                                        | 1  |
| Table S2. <sup>1</sup> H (400 MHz) and <sup>13</sup> C NMR data (100 MHz) for 3 .....                                                                          | 2  |
| Table S3. <sup>1</sup> H (400 MHz) and <sup>13</sup> C NMR data (100 MHz) for 4–6 .....                                                                        | 3  |
| Table S4. <sup>1</sup> H (400 MHz) data for the ( <i>S</i> )- and ( <i>R</i> )-MTPA esters of 6.....                                                           | 4  |
| Table S5. Immunosuppressive Effects of Compounds 1–5 on Murine<br>Lymphocyte Proliferation Induced by ConA (5 μg/mL) or LPS (20 μg/mL).....                    | 5  |
| Table S6. Cytotoxicity of 1–6 against seven Human Cancer Cell Lines .....                                                                                      | 6  |
| X-ray Crystallographic data for compounds 2–5. ....                                                                                                            | 7  |
| Supplementary immunoblotting images. ....                                                                                                                      | 8  |
| Fig. S1. Raw blot images for Bax, Bcl-2, cytochrome c, cleaved caspase 3,<br>uncleaved PARP, cleaved PARP, <i>p</i> -PI3K, <i>p</i> -Akt, Akt, and GAPDH. .... | 8  |
| Fig. S2. Raw blot images for <i>p</i> -JAK2, JAK2, PI3K, and GAPDH. ....                                                                                       | 9  |
| Fig. S3. Experimental ECD spectra of 1 and its enantiomer. ....                                                                                                | 10 |
| Fig. S4. Experimental ECD spectra of 6 and its enantiomer. ....                                                                                                | 10 |
| Computational ECD data of 1, 6 and their enantiomers. ....                                                                                                     | 10 |
| Fig. S5. <sup>1</sup> H NMR (400 MHz, CDCl <sub>3</sub> ) spectrum of 1. ....                                                                                  | 31 |
| Fig. S6. Enlarged <sup>1</sup> H NMR (400 MHz, CDCl <sub>3</sub> ) spectrum of 1. ....                                                                         | 32 |
| Fig. S7. <sup>13</sup> C NMR (100 MHz, CDCl <sub>3</sub> ) spectrum of 1. ....                                                                                 | 36 |
| Fig. S8. DEPT-135 (100 MHz, CDCl <sub>3</sub> ) spectrum of 1. ....                                                                                            | 37 |
| Fig. S9. HSQC spectrum of 1 in CDCl <sub>3</sub> . ....                                                                                                        | 38 |
| Fig. S10. HMBC spectrum of 1 in CDCl <sub>3</sub> . ....                                                                                                       | 39 |
| Fig. S11. <sup>1</sup> H– <sup>1</sup> H COSY spectrum of 1 in CDCl <sub>3</sub> . ....                                                                        | 40 |
| Fig. S12. NOESY spectrum of 1 in CDCl <sub>3</sub> . ....                                                                                                      | 41 |
| Fig. S13. HRESIMS (+) spectrum of 1. ....                                                                                                                      | 42 |
| Fig. S14. UV spectrum of 1. ....                                                                                                                               | 43 |
| Fig. S15. IR spectrum of 1. ....                                                                                                                               | 44 |
| Fig. S16. <sup>1</sup> H NMR (400 MHz, Pyridine- <i>d</i> <sub>5</sub> ) spectrum of 2. ....                                                                   | 45 |
| Fig. S17. Enlarged <sup>1</sup> H NMR (400 MHz, Pyridine- <i>d</i> <sub>5</sub> ) spectrum of 2. ....                                                          | 46 |
| Fig. S18. <sup>13</sup> C NMR (100 MHz, Pyridine- <i>d</i> <sub>5</sub> ) spectrum of 2. ....                                                                  | 50 |
| Fig. S19. DEPT-135 (100 MHz, Pyridine- <i>d</i> <sub>5</sub> ) spectrum of 2. ....                                                                             | 51 |
| Fig. S20. HSQC spectrum of 2 in Pyridine- <i>d</i> <sub>5</sub> . ....                                                                                         | 52 |
| Fig. S21. HMBC spectrum of 2 in Pyridine- <i>d</i> <sub>5</sub> . ....                                                                                         | 53 |

|                                                                                           |    |
|-------------------------------------------------------------------------------------------|----|
| Fig. S22. $^1\text{H}$ - $^1\text{H}$ COSY spectrum of 2 in Pyridine- $d_5$ . .....       | 54 |
| Fig. S23. NOESY spectrum of 2 in Pyridine- $d_5$ . .....                                  | 55 |
| Fig. S24. HRESIMS (+) spectrum of 2. ....                                                 | 56 |
| Fig. S25. UV spectrum of 2. ....                                                          | 57 |
| Fig. S26. IR spectrum of 2. ....                                                          | 58 |
| Fig. S27. ECD spectrum of 2. ....                                                         | 59 |
| Fig. S28. $^1\text{H}$ NMR (400 MHz, DMSO- $d_6$ ) spectrum of 3. ....                    | 60 |
| Fig. S29. Enlarged $^1\text{H}$ NMR (400 MHz, DMSO- $d_6$ ) spectrum of 3. ....           | 61 |
| Fig. S30. $^{13}\text{C}$ NMR (100 MHz, DMSO- $d_6$ ) spectrum of 3. ....                 | 66 |
| Fig. S31. DEPT-135 (100 MHz, DMSO- $d_6$ ) spectrum of 3. ....                            | 67 |
| Fig. S32. HSQC spectrum of 3 in DMSO- $d_6$ . ....                                        | 68 |
| Fig. S33. HMBC spectrum of 3 in DMSO- $d_6$ . ....                                        | 69 |
| Fig. S34. $^1\text{H}$ - $^1\text{H}$ COSY spectrum of 3 in DMSO- $d_6$ . ....            | 70 |
| Fig. S35. NOESY spectrum of 3 in DMSO- $d_6$ . ....                                       | 71 |
| Fig. S36. $^1\text{H}$ NMR (400 MHz, $\text{CD}_3\text{OD}$ ) spectrum of 3. ....         | 72 |
| Fig. S37. $^{13}\text{C}$ NMR (100 MHz, $\text{CD}_3\text{OD}$ ) spectrum of 3. ....      | 73 |
| Fig. S38. DEPT-135 (100 MHz, $\text{CD}_3\text{OD}$ ) spectrum of 3. ....                 | 74 |
| Fig. S39. HSQC spectrum of 3 in $\text{CD}_3\text{OD}$ . ....                             | 75 |
| Fig. S40. HMBC spectrum of 3 in $\text{CD}_3\text{OD}$ . ....                             | 76 |
| Fig. S41. $^1\text{H}$ - $^1\text{H}$ COSY spectrum of 3 in $\text{CD}_3\text{OD}$ . .... | 77 |
| Fig. S42. NOESY spectrum of 3 in $\text{CD}_3\text{OD}$ . ....                            | 78 |
| Fig. S43. HRESIMS (+) spectrum of 3. ....                                                 | 79 |
| Fig. S44. UV spectrum of 3. ....                                                          | 80 |
| Fig. S45. IR spectrum of 3. ....                                                          | 81 |
| Fig. S46. ECD spectrum of 3. ....                                                         | 82 |
| Fig. S47. $^1\text{H}$ NMR (400 MHz, $\text{CDCl}_3$ ) spectrum of 4. ....                | 83 |
| Fig. S48. Enlarged $^1\text{H}$ NMR (400 MHz, $\text{CDCl}_3$ ) spectrum of 4. ....       | 84 |
| Fig. S49. $^{13}\text{C}$ NMR (100 MHz, $\text{CDCl}_3$ ) spectrum of 4. ....             | 88 |
| Fig. S50. DEPT-135 (100 MHz, $\text{CDCl}_3$ ) spectrum of 4. ....                        | 89 |
| Fig. S51. HSQC spectrum of 4 in $\text{CDCl}_3$ . ....                                    | 90 |
| Fig. S52. HMBC spectrum of 4 in $\text{CDCl}_3$ . ....                                    | 91 |
| Fig. S53. $^1\text{H}$ - $^1\text{H}$ COSY spectrum of 4 in $\text{CDCl}_3$ . ....        | 92 |
| Fig. S54. NOESY spectrum of 4 in $\text{CDCl}_3$ . ....                                   | 93 |
| Fig. S55. HRESIMS (+) spectrum of 4. ....                                                 | 94 |

|                                                                                                         |     |
|---------------------------------------------------------------------------------------------------------|-----|
| Fig. S56. UV spectrum of 4. ....                                                                        | 95  |
| Fig. S57. IR spectrum of 4. ....                                                                        | 96  |
| Fig. S58. ECD spectrum of 4. ....                                                                       | 97  |
| Fig. S59. <sup>1</sup> H NMR (400 MHz, CDCl <sub>3</sub> ) spectrum of 5. ....                          | 98  |
| Fig. S60. Enlarged <sup>1</sup> H NMR (400 MHz, CDCl <sub>3</sub> ) spectrum of 5. ....                 | 99  |
| Fig. S61. <sup>13</sup> C NMR (100 MHz, CDCl <sub>3</sub> ) spectrum of 5. ....                         | 103 |
| Fig. S62. DEPT-135 (100 MHz, CDCl <sub>3</sub> ) spectrum of 5. ....                                    | 104 |
| Fig. S63. HSQC spectrum of 5 in CDCl <sub>3</sub> . ....                                                | 105 |
| Fig. S64. HMBC spectrum of 5 in CDCl <sub>3</sub> . ....                                                | 106 |
| Fig. S65. <sup>1</sup> H– <sup>1</sup> H COSY spectrum of 5 in CDCl <sub>3</sub> . ....                 | 107 |
| Fig. S66. NOESY spectrum of 5 in CDCl <sub>3</sub> . ....                                               | 108 |
| Fig. S67. HRESIMS (+) spectrum of 5. ....                                                               | 109 |
| Fig. S68. UV spectrum of 5. ....                                                                        | 110 |
| Fig. S69. IR spectrum of 5. ....                                                                        | 111 |
| Fig. S70. ECD spectrum of 5. ....                                                                       | 112 |
| Fig. S71. <sup>1</sup> H NMR (400 MHz, CD <sub>3</sub> OD) spectrum of 6. ....                          | 113 |
| Fig. S72. Enlarged <sup>1</sup> H NMR (400 MHz, CD <sub>3</sub> OD) spectrum of 6. ....                 | 114 |
| Fig. S73. <sup>13</sup> C NMR (100 MHz, CD <sub>3</sub> OD) spectrum of 6. ....                         | 118 |
| Fig. S74. DEPT-135 (100 MHz, CD <sub>3</sub> OD) spectrum of 6. ....                                    | 119 |
| Fig. S75. HSQC spectrum of 6 in CD <sub>3</sub> OD. ....                                                | 120 |
| Fig. S76. HMBC spectrum of 6 in CD <sub>3</sub> OD. ....                                                | 121 |
| Fig. S77. <sup>1</sup> H– <sup>1</sup> H COSY spectrum of 6 in CD <sub>3</sub> OD. ....                 | 122 |
| Fig. S78. NOESY spectrum of 6 in CD <sub>3</sub> OD. ....                                               | 123 |
| Fig. S79. HRESIMS (+) spectrum of 6. ....                                                               | 124 |
| Fig. S80. UV spectrum of 6. ....                                                                        | 125 |
| Fig. S81. IR spectrum of 6. ....                                                                        | 126 |
| Fig. S82. <sup>1</sup> H NMR (400 MHz, CD <sub>3</sub> OD) spectrum of <i>S</i> -MTPA esters of 6. .... | 127 |
| Fig. S83. <sup>1</sup> H NMR (400 MHz, CD <sub>3</sub> OD) spectrum of <i>R</i> -MTPA esters of 6. .... | 128 |

**Table S1.**  $^1\text{H}$  (400 MHz) and  $^{13}\text{C}$  NMR data (100 MHz) for **1–2**

| position     | <b>1<sup>a</sup></b>       |                                               | <b>2<sup>b</sup></b>       |                                               |
|--------------|----------------------------|-----------------------------------------------|----------------------------|-----------------------------------------------|
|              | $\delta_{\text{C}}$ , type | $\delta_{\text{H}}$ (J in Hz)                 | $\delta_{\text{C}}$ , type | $\delta_{\text{H}}$ (J in Hz)                 |
| <b>1</b>     | 173.0, C                   |                                               | 174.1, C                   |                                               |
| <b>3</b>     | 53.8, CH                   | 3.54, m                                       | 61.6, CH                   | 3.90, m                                       |
| <b>4</b>     | 45.2, CH                   | 2.69, d (6.4)                                 | 50.8, CH                   | 3.24, br s                                    |
| <b>5</b>     | 36.0, CH                   | 2.37, overlapped                              | 127.9, C                   |                                               |
| <b>6</b>     | 141.0, C                   |                                               | 135.0, C                   |                                               |
| <b>7</b>     | 123.8, CH                  | 5.75, br s                                    | 72.8, CH                   | 4.66, t (7.2)                                 |
| <b>8</b>     | 47.2, CH                   | 2.59, overlapped                              | 47.1, CH                   | 2.36, dd (13.5, 10.5)                         |
| <b>9</b>     | 70.8, C                    |                                               | 60.9, C                    |                                               |
| <b>10</b>    | 35.8, CH <sub>2</sub>      | 3.05, dd (14.3, 4.2)<br>2.79, dd (14.3, 10.1) | 34.3, CH <sub>2</sub>      | 3.82, overlapped                              |
| <b>11</b>    | 13.7, CH <sub>3</sub>      | 1.27, d (7.4)                                 | 18.1, CH <sub>3</sub>      | 1.44, s                                       |
| <b>12</b>    | 19.9, CH <sub>3</sub>      | 1.72, s                                       | 23.4, CH <sub>3</sub>      | 1.92, s                                       |
| <b>13</b>    | 41.0, CH                   | 2.89, t (8.8)                                 | 46.0, CH                   | 3.67, m                                       |
| <b>14</b>    | 40.3, CH                   | 2.37, overlapped                              | 81.8, CH                   | 5.12, overlapped                              |
| <b>15</b>    | 37.1, CH <sub>2</sub>      | 2.05, m<br>1.22, m                            | 39.2, CH <sub>2</sub>      | 2.41, dd (13.6, 7.5)<br>1.71, dd (13.6, 4.9)  |
| <b>16</b>    | 30.0, CH                   | 1.92, m                                       | 23.4, CH                   | 1.96, m                                       |
| <b>17</b>    | 47.3, CH <sub>2</sub>      | 2.59, overlapped<br>1.99, dd (17.1, 10.5)     | 36.9, CH <sub>2</sub>      | 2.17, dd (14.0, 7.0)<br>1.22, dd (14.0, 5.7)  |
| <b>18</b>    | 213.0, C                   |                                               | 79.2, CH                   | 3.95, br d (7.0)                              |
| <b>19</b>    | 44.6, CH                   | 3.08, t (7.8)                                 | 42.7, CH                   | 3.27, m                                       |
| <b>20</b>    | 50.4, CH                   | 3.47, t (7.8)                                 | 44.5, CH <sub>2</sub>      | 2.93, dd (16.2, 13.1)<br>2.83, dd (16.2, 4.8) |
| <b>21</b>    | 212.5, C                   |                                               | 212.2, C                   |                                               |
| <b>22</b>    | 27.2, CH <sub>3</sub>      | 1.01, d (6.2)                                 | 23.8, CH <sub>3</sub>      | 1.14, d (7.5)                                 |
| <b>2'</b>    | 127.8, CH                  | 6.86, br s                                    | 125.1, CH                  | 7.45, br s                                    |
| <b>3'</b>    | 111.5, C                   |                                               | 113.0, C                   |                                               |
| <b>4'</b>    | 127.1, C                   |                                               | 129.2, C                   |                                               |
| <b>5'</b>    | 118.2, CH                  | 7.57, d (7.8)                                 | 119.8, CH                  | 8.03, d (7.6)                                 |
| <b>6'</b>    | 119.4, CH                  | 7.14, t (7.8)                                 | 119.8, CH                  | 7.29, t (7.6)                                 |
| <b>7'</b>    | 122.1, CH                  | 7.22, t (7.8)                                 | 122.3, CH                  | 7.32, t (7.6)                                 |
| <b>8'</b>    | 111.9, CH                  | 7.48, d (7.8)                                 | 112.6, CH                  | 7.62, d (7.6)                                 |
| <b>9'</b>    | 136.6, C                   |                                               | 138.2, C                   |                                               |
| <b>7-OH</b>  |                            |                                               |                            | 6.74, d (7.2)                                 |
| <b>2-NH</b>  |                            | 6.62, br s                                    |                            | 9.34, br s                                    |
| <b>1'-NH</b> |                            | 8.51, br s                                    |                            | 11.94, br s                                   |

<sup>a</sup>In CDCl<sub>3</sub>. <sup>b</sup>In Pyridine-*d*<sub>5</sub>.

**Table S2.**  $^1\text{H}$  (400 MHz) and  $^{13}\text{C}$  NMR data (100 MHz) for **3**

| <b>3<sup>c</sup></b> |                            | <b>3<sup>d</sup></b>                          |                            |                                               |
|----------------------|----------------------------|-----------------------------------------------|----------------------------|-----------------------------------------------|
| position             | $\delta_{\text{C}}$ , type | $\delta_{\text{H}}$ (J in Hz)                 | $\delta_{\text{C}}$ , type | $\delta_{\text{H}}$ (J in Hz)                 |
| <b>1</b>             | 174.8, C                   |                                               | 171.8, C                   |                                               |
| <b>3</b>             | 61.4, CH                   | 3.46, dd (9.2, 5.5)                           | 59.0, CH                   | 3.30, dd (9.4, 5.0)                           |
| <b>4</b>             | 51.2, CH                   | 2.85, br s                                    | 49.5, CH                   | 2.71, br s                                    |
| <b>5</b>             | 129.2, C                   |                                               | 127.6, C                   |                                               |
| <b>6</b>             | 134.2, C                   |                                               | 132.7, C                   |                                               |
| <b>7</b>             | 77.6, CH                   | 3.96, d (10.6)                                | 75.2, CH                   | 3.78, overlapped                              |
| <b>8</b>             | 52.4, CH                   | 2.43, dd (13.4, 10.6)                         | 50.9, CH                   | 2.31, dd (13.5, 10.5)                         |
| <b>9</b>             | 57.5, C                    |                                               | 55.4, C                    |                                               |
| <b>10</b>            | 34.3, CH <sub>2</sub>      | 3.31, dd (13.5, 9.2)<br>3.17, dd (13.5, 5.5)  | 33.1, CH <sub>2</sub>      | 3.17, dd (13.2, 9.4)<br>3.01, dd (13.2, 5.0)  |
| <b>11</b>            | 16.5, CH <sub>3</sub>      | 0.93, s                                       | 16.0, CH <sub>3</sub>      | 0.83, s                                       |
| <b>12</b>            | 13.4, CH <sub>3</sub>      | 1.63, s                                       | 13.3, CH <sub>3</sub>      | 1.54, s                                       |
| <b>13</b>            | 43.4, CH                   | 2.71, dt (13.4, 10.7)                         | 41.8, CH                   | 2.57, dt (13.5, 10.7)                         |
| <b>14</b>            | 83.8, CH                   | 4.32, t (10.7)                                | 81.3, CH                   | 4.17, t (10.7)                                |
| <b>15</b>            | 44.9, CH <sub>2</sub>      | 2.12, overlapped<br>1.26, m                   | 43.7, CH <sub>2</sub>      | 2.01, overlapped<br>1.22, m                   |
| <b>16</b>            | 26.0, CH                   | 2.12, overlapped                              | 24.5, CH                   | 2.01, overlapped                              |
| <b>17</b>            | 43.8, CH <sub>2</sub>      | 2.04, m<br>1.33, m                            | 42.7, CH <sub>2</sub>      | 1.90, dd (14.2, 8.1)<br>1.22, m               |
| <b>18</b>            | 71.1, CH                   | 3.90, dd (8.0, 3.3)                           | 68.6, CH                   | 3.78, overlapped                              |
| <b>19</b>            | 37.2, CH                   | 2.58, m                                       | 35.6, CH                   | 2.42, m                                       |
| <b>20</b>            | 43.4, CH <sub>2</sub>      | 3.03, dd (16.5, 13.1)<br>2.31, dd (16.5, 4.8) | 42.6, CH <sub>2</sub>      | 2.99, dd (16.5, 13.2)<br>2.16, dd (16.5, 4.8) |
| <b>21</b>            | 213.3, C                   |                                               | 212.4, C                   |                                               |
| <b>22</b>            | 24.2, CH <sub>3</sub>      | 1.00, d (6.6)                                 | 23.7, CH <sub>3</sub>      | 0.93, d (6.5)                                 |
| <b>2'</b>            | 124.7, CH                  | 7.12, br s                                    | 123.9, CH                  | 7.18, br d (2.3)                              |
| <b>3'</b>            | 111.8, C                   |                                               | 110.3, C                   |                                               |
| <b>4'</b>            | 129.1, C                   |                                               | 127.5, C                   |                                               |
| <b>5'</b>            | 119.4, CH                  | 7.59, d (7.9)                                 | 118.1, CH                  | 7.52, d (8.0)                                 |
| <b>6'</b>            | 119.9, CH                  | 7.01, t (7.9)                                 | 118.4, CH                  | 6.98, t (8.0)                                 |
| <b>7'</b>            | 122.4, CH                  | 7.09, t (7.9)                                 | 120.9, CH                  | 7.06, t (8.0)                                 |
| <b>8'</b>            | 112.4, CH                  | 7.35, d (7.9)                                 | 111.5, CH                  | 7.34, d (8.0)                                 |
| <b>9'</b>            | 138.2, C                   |                                               | 136.2, C                   |                                               |
| <b>18-OH</b>         |                            |                                               |                            | 4.76, d (4.2)                                 |
| <b>2-NH</b>          |                            |                                               |                            | 8.25, br s                                    |
| <b>1'-NH</b>         |                            |                                               |                            | 10.89, br s                                   |

<sup>c</sup>In CD<sub>3</sub>OD. <sup>d</sup>In DMSO-*d*<sub>6</sub>

**Table S3.**  $^1\text{H}$  (400 MHz) and  $^{13}\text{C}$  NMR data (100 MHz) for **4–6**

| position     | <b>4<sup>a</sup></b>       |                                               | <b>5<sup>a</sup></b>       |                                              | <b>6<sup>c</sup></b>       |                                              |
|--------------|----------------------------|-----------------------------------------------|----------------------------|----------------------------------------------|----------------------------|----------------------------------------------|
|              | $\delta_{\text{C}}$ , type | $\delta_{\text{H}}$ ( <i>J</i> in Hz)         | $\delta_{\text{C}}$ , type | $\delta_{\text{H}}$ ( <i>J</i> in Hz)        | $\delta_{\text{C}}$ , type | $\delta_{\text{H}}$ ( <i>J</i> in Hz)        |
| <b>1</b>     | 172.5, C                   |                                               | 171.6, C                   |                                              | 174.8, C                   |                                              |
| <b>3</b>     | 59.3, CH                   | 3.55, dd (9.1, 5.8)                           | 58.7, CH                   | 3.61, dd (9.5, 5.1)                          | 55.5, CH                   | 3.43, ddd (8.4, 5.7, 2.2)                    |
| <b>4</b>     | 50.9, CH                   | 2.86, br s                                    | 47.8, CH                   | 3.35, br s                                   | 46.7, CH                   | 3.29, dd (6.0, 2.2)                          |
| <b>5</b>     | 127.1, C                   |                                               | 127.2, C                   |                                              | 35.4, CH                   | 2.10, m                                      |
| <b>6</b>     | 134.2, C                   |                                               | 133.3, C                   |                                              | 142.0, C                   |                                              |
| <b>7</b>     | 76.5, CH                   | 4.09, d (10.7)                                | 76.9, CH                   | 4.21, d (10.6)                               | 124.8, CH                  | 5.38, br s                                   |
| <b>8</b>     | 50.8, CH                   | 2.49, dd (13.3, 10.7)                         | 54.4, CH                   | 1.95, dd (12.7, 10.6)                        | 47.8, CH                   | 2.13, br d (11.4)                            |
| <b>9</b>     | 56.1, C                    |                                               | 58.2, C                    |                                              | 67.9, C                    |                                              |
| <b>10</b>    | 34.4, CH <sub>2</sub>      | 3.30, dd (14.0, 9.1)<br>3.22, dd (14.0, 5.8)  | 34.3, CH <sub>2</sub>      | 3.10, dd (14.3, 5.1)<br>2.89, dd (14.3, 9.5) | 34.9, CH <sub>2</sub>      | 2.84, dd (13.8, 5.7)<br>2.68, dd (13.8, 8.4) |
| <b>11</b>    | 17.5, CH <sub>3</sub>      | 1.50, s                                       | 17.1, CH <sub>3</sub>      | 1.53, s                                      | 13.2, CH <sub>3</sub>      | 0.56, d (7.2)                                |
| <b>12</b>    | 13.5, CH <sub>3</sub>      | 1.75, s                                       | 13.4, CH <sub>3</sub>      | 1.70, s                                      | 19.8, CH <sub>3</sub>      | 1.59, s                                      |
| <b>13</b>    | 42.3, CH                   | 2.79, td (13.3, 9.8)                          | 39.6, CH                   | 2.98, td (12.7, 9.4)                         | 43.3, CH                   | 3.82, td (11.4, 9.4)                         |
| <b>14</b>    | 83.4, CH                   | 3.97, t (9.8)                                 | 85.9, CH                   | 3.70, ddd (11.3, 9.4, 4.0)                   | 139.3, CH                  | 5.31, m                                      |
| <b>15</b>    | 44.1, CH <sub>2</sub>      | 2.19, br d (11.8)<br>1.43, q (11.8)           | 42.9, CH <sub>2</sub>      | 2.18, br d (11.8)<br>1.49, q (11.8)          | 118.5, CH <sub>2</sub>     | 4.98, dd (11.3, 1.7)<br>4.95, dd (4.6, 1.7)  |
| <b>16</b>    | 34.4, CH                   | 1.57, m                                       | 27.6, CH                   | 1.84, m                                      | 145.9, CH                  | 6.90, dq (15.6, 6.8)                         |
| <b>17</b>    | 36.4, CH <sub>2</sub>      | 1.78, overlapped<br>1.19, m                   | 52.8, CH <sub>2</sub>      | 2.67, dd (16.1, 11.2)<br>2.48, t (16.3)      | 133.1, CH                  | 6.29, dq (15.6, 1.7)                         |
| <b>18</b>    | 32.9, CH <sub>2</sub>      | 1.78, overlapped<br>1.23, m                   | 213.1, C                   |                                              | 201.4, C                   |                                              |
| <b>19</b>    | 30.9, CH                   | 2.66, m                                       | 55.8, CH                   | 2.54, t (10.1)                               | 61.6, CH                   | 3.03, t (11.1)                               |
| <b>20</b>    | 45.9, CH <sub>2</sub>      | 2.49, dd (16.5, 6.1)<br>2.45, dd (16.5, 11.7) | 74.4, CH                   | 4.95, d (10.1)                               | 75.5, CH                   | 5.32, d (11.1)                               |
| <b>21</b>    | 210.9, C                   |                                               | 202.5, C                   |                                              | 206.1, C                   |                                              |
| <b>22</b>    | 23.8, CH <sub>3</sub>      | 0.98, d (6.5)                                 | 24.4, CH <sub>3</sub>      | 1.06, d (6.8)                                | 18.5, CH <sub>3</sub>      | 1.87, dd (6.8, 1.6)                          |
| <b>2'</b>    | 123.1, CH                  | 7.08, br d (2.3)                              | 123.0, CH                  | 6.99, br d (2.2)                             | 124.7, CH                  | 7.11, br s                                   |
| <b>3'</b>    | 112.0, C                   |                                               | 111.1, C                   |                                              | 111.7, C                   |                                              |
| <b>4'</b>    | 127.4, C                   |                                               | 127.1, C                   |                                              | 128.9, C                   |                                              |
| <b>5'</b>    | 118.8, CH                  | 7.58, d (7.9)                                 | 118.3, CH                  | 7.56, d (7.8)                                | 119.3, CH                  | 7.61, d (8.0)                                |
| <b>6'</b>    | 119.8, CH                  | 7.12, t (7.9)                                 | 119.5, CH                  | 7.11, t (7.8)                                | 119.8, CH                  | 6.98, t (8.0)                                |
| <b>7'</b>    | 122.4, CH                  | 7.20, t (7.9)                                 | 122.2, CH                  | 7.19, t (7.8)                                | 122.4, CH                  | 7.04, t (8.0)                                |
| <b>8'</b>    | 111.4, CH                  | 7.36, d (7.9)                                 | 111.7, CH                  | 7.40, d (7.8)                                | 112.4, CH                  | 7.30, d (8.0)                                |
| <b>9'</b>    | 136.6, C                   |                                               | 136.5, C                   |                                              | 137.9, C                   |                                              |
| <b>2-NH</b>  |                            | 5.89, br s                                    |                            | 7.23, br s                                   |                            |                                              |
| <b>1'-NH</b> |                            | 8.17, br s                                    |                            | 8.72, br s                                   |                            |                                              |

<sup>a</sup>In CDCl<sub>3</sub>, <sup>c</sup>In CD<sub>3</sub>OD

**Table S4.** <sup>1</sup>H (400 MHz) data for the (*S*)- and (*R*)-MTPA esters of **6**

|           | ( <i>S</i> )-MTPA ester <sup>c</sup> | ( <i>R</i> )-MTPA ester <sup>c</sup> | $\Delta\delta^{S-R}$ |
|-----------|--------------------------------------|--------------------------------------|----------------------|
| position  | $\delta_H$ (J in Hz)                 | $\delta_H$ (J in Hz)                 |                      |
| <b>3</b>  | 3.48, m                              | 3.50, m                              | - 0.02               |
| <b>4</b>  | 3.34, overlapped                     | 3.34, overlapped                     | 0                    |
| <b>5</b>  | 2.18, m                              | 2.20, m                              | - 0.02               |
| <b>7</b>  | 5.44, br s                           | 5.44, br s                           | 0                    |
| <b>8</b>  | 2.30, br d (11.4)                    | 2.31, br d (11.4)                    | - 0.01               |
| <b>10</b> | 2.92, dd (13.9, 5.7)                 | 2.92, dd (13.9, 5.7)                 | 0                    |
|           | 2.76, dd (13.9, 8.4)                 | 2.76, dd (13.9, 8.4)                 | 0                    |
| <b>11</b> | 0.71, d (7.2)                        | 0.71, d (7.2)                        | 0                    |
| <b>12</b> | 1.67, s                              | 1.67, s                              | 0                    |
| <b>13</b> | 3.89, td (11.4, 9.5)                 | 3.85, td (11.4, 9.5)                 | + 0.04               |
| <b>14</b> | 5.40, m                              | 5.40, m                              | 0                    |
| <b>15</b> | 5.08, dd (11.2, 1.8)                 | 5.04, dd (11.2, 1.8)                 | + 0.04               |
|           | 5.04, br s                           | 5.00, br s                           | + 0.04               |
| <b>16</b> | 6.92, dq (15.6, 6.8)                 | 6.67, dq (15.7, 6.9)                 | + 0.25               |
| <b>17</b> | 6.22, dq (15.6, 1.8)                 | 5.89, dq (15.7, 1.8)                 | + 0.33               |
| <b>19</b> | 3.51, t (11.2)                       | 3.45, t (11.2)                       | + 0.06               |
| <b>20</b> | 6.61, d (11.2)                       | 6.61, d (11.2)                       | 0                    |
| <b>22</b> | 1.87, dd (6.8, 1.6)                  | 1.72, dd (6.9, 1.6)                  | + 0.15               |
| <b>2'</b> | 7.16, br s                           | 7.16, br s                           | 0                    |
| <b>5'</b> | 7.66, d (8.0)                        | 7.66, d (8.0)                        | 0                    |
| <b>6'</b> | 7.04, t (8.0)                        | 7.04, t (8.0)                        | 0                    |
| <b>7'</b> | 7.10, t (8.0)                        | 7.10, t (8.0)                        | 0                    |
| <b>8'</b> | 7.34, d (8.0)                        | 7.34, d (8.0)                        | 0                    |

<sup>c</sup>In CD<sub>3</sub>OD



**Table S5.** Immunosuppressive Effects of Compounds **1–5** on Murine Lymphocyte Proliferation Induced by ConA (5  $\mu\text{g}/\text{mL}$ ) or LPS (20  $\mu\text{g}/\text{mL}$ )

| Compounds  | ConA-induced T-cell proliferation           | LPS-induced B-cell proliferation            |
|------------|---------------------------------------------|---------------------------------------------|
|            | IC <sub>50</sub> ( $\mu\text{M}$ ) $\pm$ SD | IC <sub>50</sub> ( $\mu\text{M}$ ) $\pm$ SD |
| <b>1</b>   | 6.0 $\pm$ 0.9                               | 10.8 $\pm$ 0.3                              |
| <b>2</b>   | > 50.0                                      | > 50.0                                      |
| <b>3</b>   | > 50.0                                      | > 50.0                                      |
| <b>4</b>   | > 50.0                                      | > 50.0                                      |
| <b>5</b>   | 19 $\pm$ 0.5                                | 32 $\pm$ 1.1                                |
| <b>CsA</b> | 0.2 $\pm$ 0.3                               | NT <sup>a</sup>                             |
| <b>MMF</b> | <sup>a</sup> NT                             | 0.6 $\pm$ 0.7                               |

<sup>a</sup>NT: not tested.

**Table S6.** Cytotoxicity of **1–6** against seven Human Cancer Cell Lines

| <b>Compounds (50<br/><math>\mu</math>M)</b> | <b>Cell viability (%)</b> |                |                |                 |                |                |                |
|---------------------------------------------|---------------------------|----------------|----------------|-----------------|----------------|----------------|----------------|
|                                             | A549                      | A427           | HCT116         | HT-29           | HepG2          | MCF-7          | Hela           |
| <b>1</b>                                    | 66.2 $\pm$ 1.3            | 74.5 $\pm$ 0.9 | 74.1 $\pm$ 2.3 | 70.1 $\pm$ 1.4  | 82.3 $\pm$ 1.0 | 84.5 $\pm$ 3.1 | 73.4 $\pm$ 1.1 |
| <b>2</b>                                    | 80.3 $\pm$ 1.4            | 77.8 $\pm$ 2.2 | 68.9 $\pm$ 2.6 | 93.8 $\pm$ 2.3  | 89.0 $\pm$ 2.5 | 80.2 $\pm$ 2.2 | 81.2 $\pm$ 2.7 |
| <b>3</b>                                    | 86.9 $\pm$ 0.6            | 78.5 $\pm$ 1.1 | 85.7 $\pm$ 1.5 | 102.0 $\pm$ 0.6 | 88.5 $\pm$ 1.6 | 75.8 $\pm$ 1.7 | 68.0 $\pm$ 2.1 |
| <b>4</b>                                    | 67.4 $\pm$ 0.6            | 96.3 $\pm$ 1.1 | 61.4 $\pm$ 0.4 | 61.5 $\pm$ 0.8  | 90.1 $\pm$ 1.9 | 81.6 $\pm$ 1.4 | 70.5 $\pm$ 1.0 |
| <b>5</b>                                    | 70.9 $\pm$ 1.2            | 66.4 $\pm$ 0.8 | 67.1 $\pm$ 0.3 | 82.7 $\pm$ 2.1  | 70.4 $\pm$ 3.2 | 81.4 $\pm$ 1.3 | 76.7 $\pm$ 1.5 |
| <b>6</b>                                    | 42.6 $\pm$ 1.8            | 31.6 $\pm$ 1.4 | 28.3 $\pm$ 1.9 | 51.8 $\pm$ 1.7  | 71.8 $\pm$ 1.4 | 68.9 $\pm$ 1.1 | 59.7 $\pm$ 2.2 |
| <b>Doxorubicin<br/>hydrochloride</b>        | 3.2 $\pm$ 0.8             | 1.3 $\pm$ 0.5  | 2.2 $\pm$ 0.9  | 2.5 $\pm$ 1.4   | 2.6 $\pm$ 0.2  | 1.7 $\pm$ 0.8  | 1.3 $\pm$ 0.5  |

Doxorubicin hydrochloride was applied as a positive control.

The cell viability (showed as means  $\pm$  SEM), were normalized and depicted as a percentage of the control group, which is set to 100%.

## X-ray Crystallographic data for compounds 2–5.

*Crystallographic data for pseudoglobosin B (2):*  $C_{29}H_{34}N_2O_4$ ,  $M = 474.58$ , orthorhombic, space group  $P2_12_12_1$  (no. 19),  $a = 7.69617(11)$  Å,  $b = 17.1438(3)$  Å,  $c = 18.2154(3)$  Å,  $\alpha = 90^\circ$ ,  $\beta = 98.1710(14)^\circ$ ,  $\gamma = 90^\circ$ ,  $V = 2403.37(6)$  Å<sup>3</sup>,  $T = 99.98(10)$  K,  $Z = 4$ ,  $\mu(\text{Cu K}\alpha) = 0.698$  mm<sup>-1</sup>,  $D_{\text{calc}} = 1.312$  g/cm<sup>3</sup>, 32691 reflections measured ( $7.08^\circ \leq 2\theta \leq 148.006^\circ$ ), 4811 unique ( $R_{\text{int}} = 0.0561$ ,  $R_{\text{sigma}} = 0.0315$ ) which were used in all calculations. The final  $R_1$  was 0.0378 ( $I > 2\sigma(I)$ ) and  $wR_2$  was 0.0975 (all data). The goodness of fit on  $F^2$  was 1.054. Flack parameter =  $-0.17(11)$ .

*Crystallographic data for pseudoglobosin C (3):*  $C_{29}H_{36}N_2O_5$ ,  $M = 492.60$ , orthorhombic, space group  $P2_12_12_1$  (no. 19),  $a = 11.91695(4)$  Å,  $b = 13.87123(6)$  Å,  $c = 15.20036(6)$  Å,  $\alpha = 90^\circ$ ,  $\beta = 91.3759(5)^\circ$ ,  $\gamma = 90^\circ$ ,  $V = 2512.660(17)$  Å<sup>3</sup>,  $Z = 4$ ,  $T = 100.00(10)$  K,  $\mu(\text{Cu K}\alpha) = 0.716$  mm<sup>-1</sup>,  $D_{\text{calc}} = 1.302$  g/cm<sup>3</sup>, 66071 reflections measured ( $8.63^\circ \leq 2\theta \leq 147.854^\circ$ ), 5083 unique ( $R_{\text{int}} = 0.0329$ ,  $R_{\text{sigma}} = 0.0122$ ) which were used in all calculations. The final  $R_1$  was 0.0271 ( $I > 2\sigma(I)$ ) and  $wR_2$  was 0.0723 (all data). The goodness of fit on  $F^2$  was 1.058. The Flack parameter was 0.03(3).

*Crystallographic data for pseudoglobosin D (4):*  $C_{30.5}H_{35.5}Cl_{4.5}N_2O_3$ ,  $M = 637.63$ , monoclinic, space group  $P2_1$  (no.4),  $a = 9.1280(2)$  Å,  $b = 12.6160(2)$  Å,  $c = 26.8390(2)$  Å,  $\alpha = 90^\circ$ ,  $\beta = 99.5200(4)^\circ$ ,  $\gamma = 90^\circ$ ,  $V = 3048.18(9)$  Å<sup>3</sup>,  $Z = 4$ ,  $T = 100.00(10)$  K,  $\mu(\text{Cu K}\alpha) = 4.213$  mm<sup>-1</sup>,  $D_{\text{calc}} = 1.389$  g/cm<sup>3</sup>, 74838 reflections measured ( $6.678^\circ \leq 2\theta \leq 147.96^\circ$ ), 12235 unique ( $R_{\text{int}} = 0.0394$ ,  $R_{\text{sigma}} = 0.0232$ ) which was used in all calculations. The final  $R_1$  was 0.0502 ( $I > 2\sigma(I)$ ) and  $wR_2$  was 0.1313 (all data). The goodness of fit on  $F^2$  was 1.057. The Flack parameter was 0.018(3).

*Crystallographic data for pseudoglobosin E (5):*  $C_{29}H_{32}N_2O_5$ ,  $M = 488.57$ , orthorhombic, space group  $P2_12_12_1$  (no. 19),  $a = 9.4476(2)$  Å,  $b = 23.1865(4)$  Å,  $c = 39.8892(7)$  Å,  $\alpha = \beta = \gamma = 90^\circ$ ,  $V = 8738.0(3)$  Å<sup>3</sup>,  $Z = 12$ ,  $T = 99.99(10)$  K,  $\mu(\text{Cu K}\alpha) = 0.617$  mm<sup>-1</sup>,  $D_{\text{calc}} = 1.114$  g/cm<sup>3</sup>, 53113 reflections measured ( $5.844^\circ \leq 2\theta \leq 147.962^\circ$ ), 17186 unique ( $R_{\text{int}} = 0.0579$ ,  $R_{\text{sigma}} = 0.0650$ ) which were used in all calculations. The final  $R_1$  was 0.0601 ( $I > 2\sigma(I)$ ) and  $wR_2$  was 0.1654 (all data). The goodness of fit on  $F^2$  was 1.031. The Flack parameter was  $-0.07(9)$ .

Supplementary immunoblotting images.

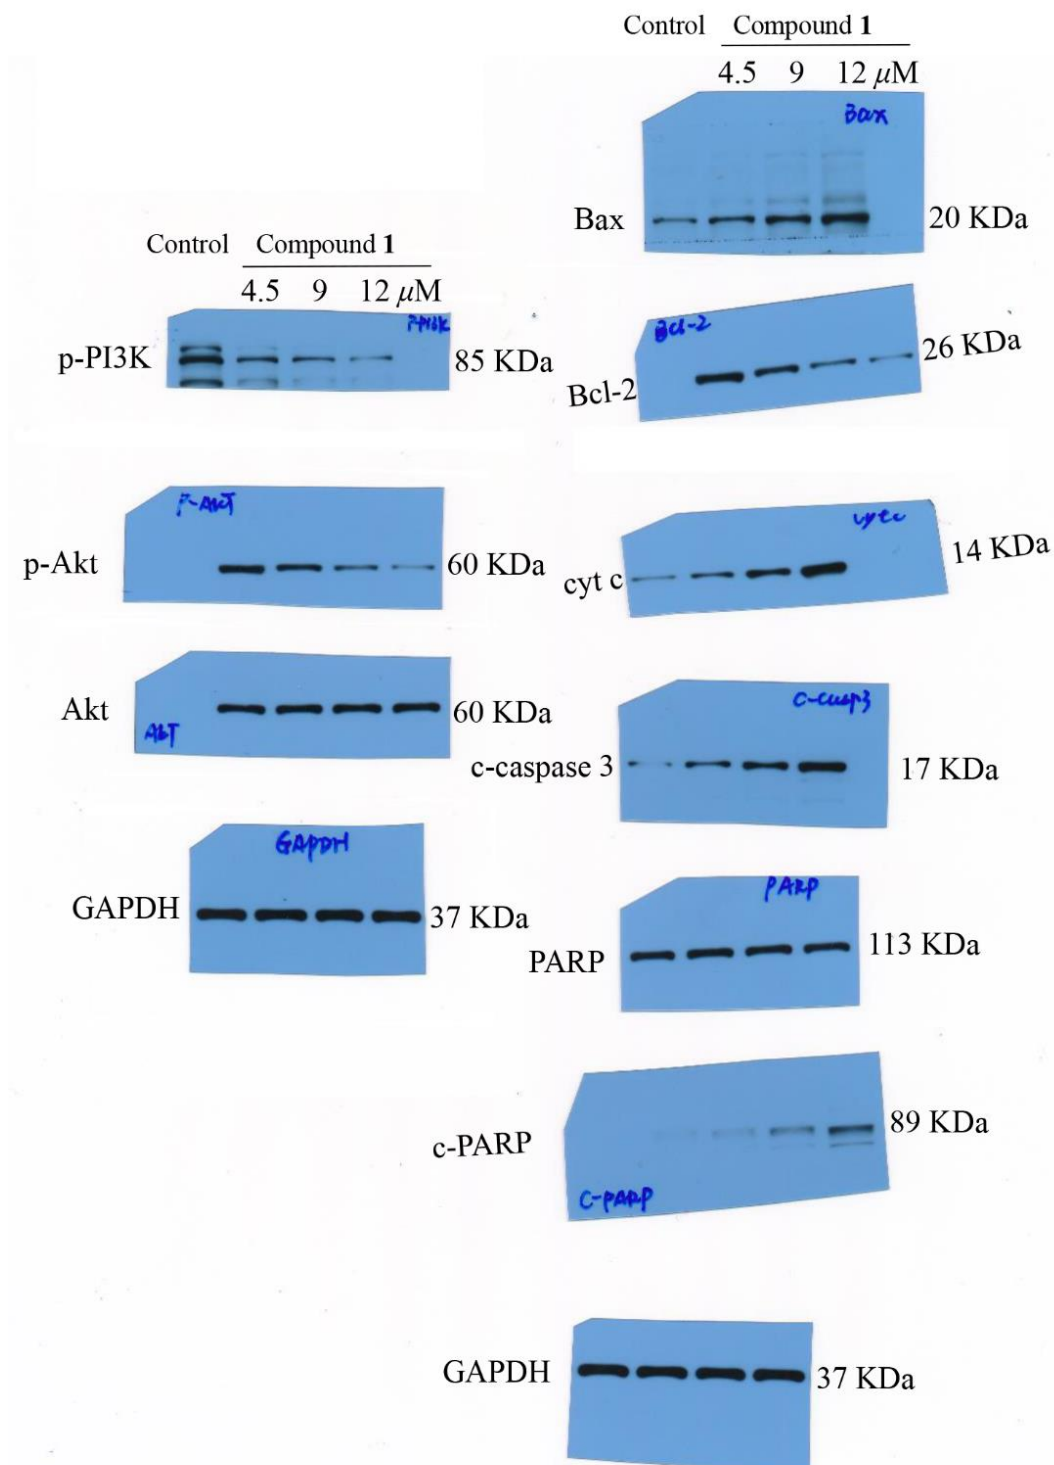

**Fig. S1.** Raw blot images for Bax, Bcl-2, cytochrome c, cleaved caspase 3, uncleaved PARP, cleaved PARP, *p*-PI3K, *p*-Akt, Akt, and GAPDH.

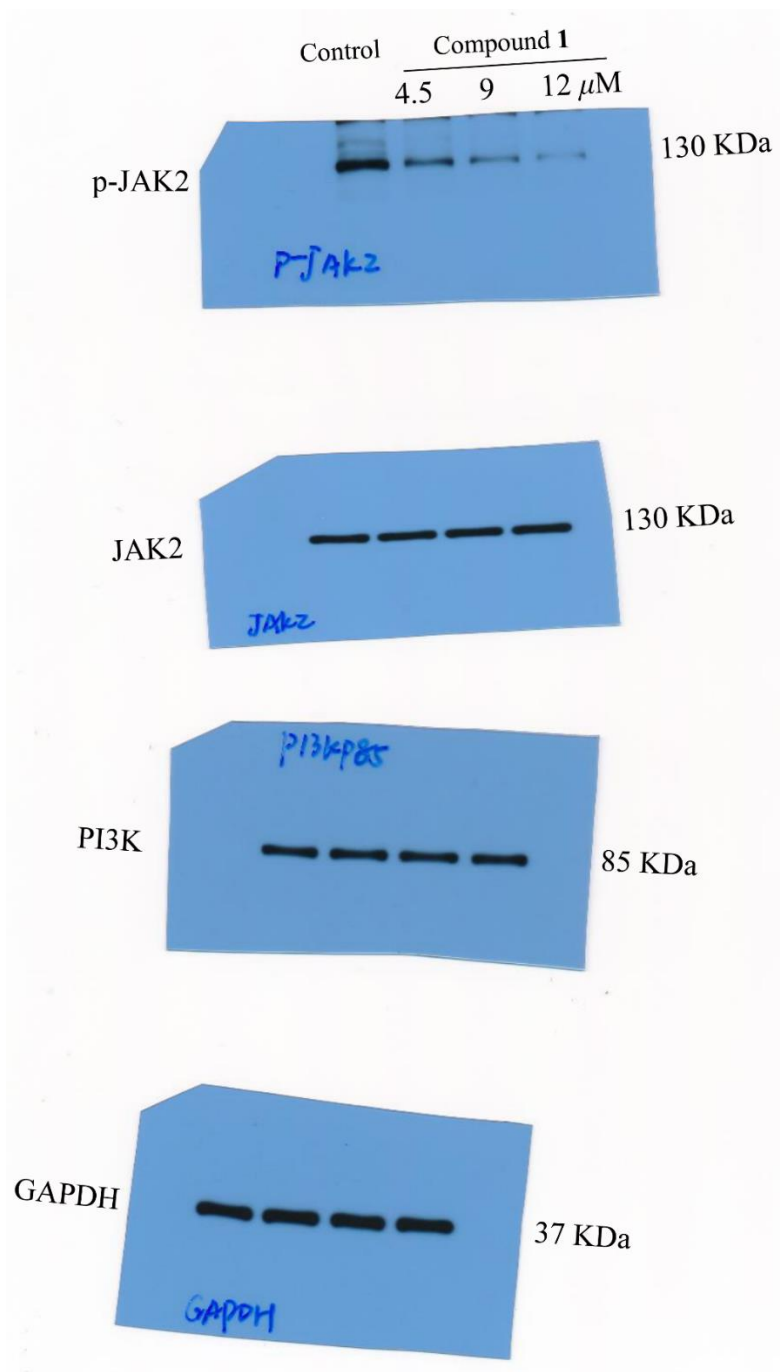

**Fig. S2.** Raw blot images for *p*-JAK2, JAK2, PI3K, and GAPDH.

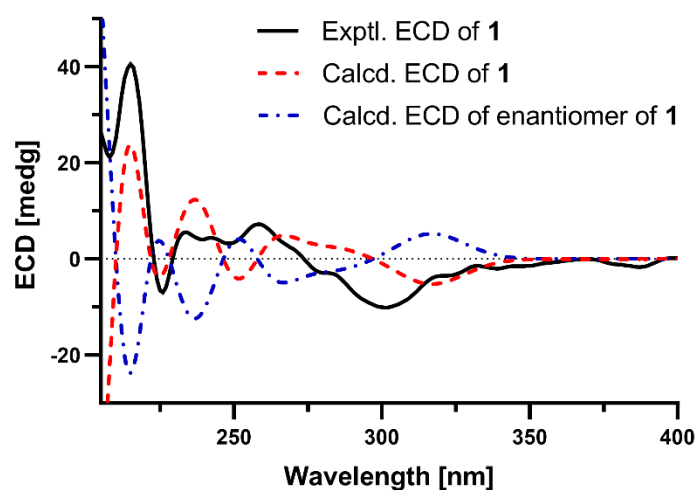

Fig. S3. Experimental ECD spectra of **1** and its enantiomer.

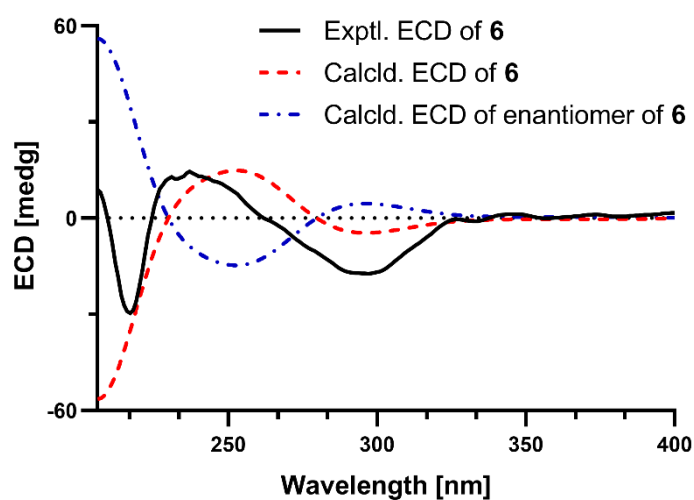

Fig. S4. Experimental ECD spectra of **6** and its enantiomer.

#### Computational ECD data of **1**, **6** and their enantiomers.

**Table S7.** Important thermodynamic parameters (a.u.) and Boltzmann distribution of the optimized compound **1** at B3LYP/6-311+G(d,p)//B3LYP/6-31G(d) level in methanol

| Conformation | Internal Energy | %      |
|--------------|-----------------|--------|
| 1            | -1459.342989    | 60.08% |
| 2            | -1459.341805    | 17.03% |
| 3            | -1459.341790    | 16.85% |
| 4            | -1459.340645    | 5.04%  |

**Table S8.** Important thermodynamic parameters (a.u.) and Boltzmann distribution of the optimized the enantiomer of compound **1** at B3LYP/6-311+G(d,p)//B3LYP/6-31G(d) level in methanol

| Conformation | Internal Energy | %      |
|--------------|-----------------|--------|
| 1            | -1459.342989    | 60.40% |
| 2            | -1459.341805    | 17.12% |
| 3            | -1459.341790    | 16.94% |
| 4            | -1459.340645    | 5.01%  |

**Table S9.** Important thermodynamic parameters (a.u.) and Boltzmann distribution of the optimized compound **6** at B3LYP/6-311+G(d,p)//B3LYP/6-31G(d) level in methanol

| Conformation | Internal Energy | %      |
|--------------|-----------------|--------|
| 1            | -1534.578567    | 42.26% |
| 2            | -1534.577769    | 18.11% |
| 3            | -1534.577660    | 16.12% |
| 4            | -1534.577033    | 8.27%  |
| 5            | -1534.577030    | 8.27%  |
| 6            | -1534.576323    | 3.90%  |
| 7            | -1534.575681    | 1.98%  |

**Table S10.** Important thermodynamic parameters (a.u.) and Boltzmann distribution of the optimized the enantiomer of compound **6** at B3LYP/6-311+G(d,p)//B3LYP/6-31G(d) level in methanol

| Conformation | Internal Energy | %      |
|--------------|-----------------|--------|
| 1            | -1534.578566    | 41.92% |
| 2            | -1534.577770    | 17.97% |
| 3            | -1534.577659    | 15.99% |
| 4            | -1534.577032    | 8.20%  |
| 5            | -1534.577030    | 8.20%  |
| 6            | -1534.576322    | 3.87%  |
| 7            | -1534.575681    | 1.96%  |

**Table S11.** Optimized coordinates of compound **1** at B3LYP/6-31G(d) level in methanol

| Conformation 1 |       |        |        |      |        |        |        |
|----------------|-------|--------|--------|------|--------|--------|--------|
| Atom           | X     | Y      | Z      | Atom | X      | Y      | Z      |
| C              | 7.008 | 0.663  | -0.466 | O    | -0.5   | -0.457 | 2.244  |
| C              | 7.768 | -0.228 | 0.323  | H    | 7.481  | 1.557  | -0.862 |
| C              | 5.668 | 0.413  | -0.742 | H    | 8.813  | -0.006 | 0.523  |
| C              | 7.204 | -1.386 | 0.849  | H    | 5.096  | 1.106  | -1.354 |
| C              | 5.066 | -0.749 | -0.224 | H    | 7.788  | -2.073 | 1.454  |
| C              | 5.855 | -1.634 | 0.568  | H    | -1.662 | 2.971  | 1.658  |

|                |          |          |          |             |          |          |          |
|----------------|----------|----------|----------|-------------|----------|----------|----------|
| C              | -1.205   | 2.571    | 0.755    | H           | 3        | -3.218   | 0.585    |
| C              | 3.782    | -2.49    | 0.412    | H           | -6.982   | -2.227   | -0.76    |
| C              | 3.742    | -1.32    | -0.311   | H           | -5.936   | -2.332   | 0.652    |
| C              | -0.104   | 3.115    | 0.207    | H           | -5.145   | -0.295   | 1.835    |
| C              | -4.962   | -1.658   | -1.108   | H           | -5.799   | 1.298    | 1.48     |
| C              | -1.352   | -0.919   | -0.599   | H           | -2.087   | 1.611    | -0.916   |
| C              | 0.075    | -0.079   | 1.226    | H           | -0.396   | 2.593    | -1.823   |
| C              | -6.191   | -1.701   | -0.215   | H           | -3.599   | -0.23    | -1.862   |
| C              | -5.473   | 0.359    | 1.014    | H           | -2.882   | -1.763   | 0.695    |
| C              | -1.758   | 1.337    | 0.102    | H           | -4.477   | 1.587    | -0.468   |
| C              | 0.413    | 2.468    | -1.085   | H           | -2.876   | 0.542    | 1.821    |
| C              | -3.951   | -0.55    | -0.877   | H           | 0.531    | 0.496    | -1.977   |
| C              | -2.726   | -0.884   | 0.064    | H           | -6.929   | 0.293    | -0.572   |
| C              | -4.3     | 0.647    | 0.066    | H           | 2.59     | 1.234    | -0.163   |
| C              | -2.898   | 0.512    | 0.731    | H           | 1.621    | 4.12     | 1.053    |
| C              | 0.56     | 0.904    | -0.961   | H           | 0.06     | 4.66     | 1.697    |
| C              | -6.649   | -0.322   | 0.297    | H           | 0.591    | 5.167    | 0.084    |
| C              | 1.869    | 0.419    | -0.268   | H           | 2.511    | 3.151    | -1.037   |
| C              | -0.593   | 0.326    | -0.114   | H           | 1.431    | 4.165    | -1.993   |
| C              | 0.575    | 4.327    | 0.79     | H           | 1.946    | 2.595    | -2.619   |
| C              | 1.649    | 3.13     | -1.71    | H           | -7.647   | -1.054   | 2.093    |
| C              | -7.879   | -0.455   | 1.203    | H           | -8.708   | -0.943   | 0.678    |
| C              | 2.548    | -0.749   | -1.022   | H           | -8.224   | 0.529    | 1.541    |
| N              | 1.411    | 0.025    | 1.058    | H           | 2.841    | -0.373   | -2.012   |
| N              | 5.042    | -2.682   | 0.94     | H           | 1.797    | -1.529   | -1.19    |
| O              | -4.774   | -2.494   | -1.98    | H           | 2.048    | -0.308   | 1.771    |
| O              | -0.944   | -1.757   | -1.379   | H           | 5.324    | -3.476   | 1.496    |
| Conformation 2 |          |          |          |             |          |          |          |
| <b>Atom</b>    | <b>X</b> | <b>Y</b> | <b>Z</b> | <b>Atom</b> | <b>X</b> | <b>Y</b> | <b>Z</b> |
| C              | 4.217    | -3.351   | 1.068    | O           | -0.022   | -0.468   | 1.995    |
| C              | 5.606    | -3.333   | 1.319    | H           | 3.619    | -4.176   | 1.445    |
| C              | 3.604    | -2.331   | 0.348    | H           | 6.057    | -4.144   | 1.885    |
| C              | 6.41     | -2.298   | 0.852    | H           | 2.534    | -2.358   | 0.161    |
| C              | 4.388    | -1.266   | -0.137   | H           | 7.48     | -2.284   | 1.041    |
| C              | 5.789    | -1.274   | 0.127    | H           | -1.765   | 2.731    | 2.169    |
| C              | -1.318   | 2.602    | 1.185    | H           | 5.535    | 1.482    | -1.604   |
| C              | 5.311    | 0.564    | -1.077   | H           | -5.179   | -2.936   | 0.204    |
| C              | 4.105    | -0.077   | -0.91    | H           | -6.337   | -2.712   | -1.104   |
| C              | -0.361   | 3.424    | 0.72     | H           | -5.571   | 0.4      | 1.825    |
| C              | -4.471   | -1.733   | -1.395   | H           | -4.638   | -1.09    | 1.785    |
| C              | -0.996   | -0.527   | -0.851   | H           | -2.16    | 1.856    | -0.611   |
| C              | 0.405    | 0.186    | 1.046    | H           | -0.714   | 3.28     | -1.362   |
| C              | -5.601   | -2.186   | -0.486   | H           | -3.406   | 0.032    | -1.854   |



|                |          |          |          |             |          |          |          |
|----------------|----------|----------|----------|-------------|----------|----------|----------|
| C              | -5.135   | -0.344   | 1.147    | H           | -2.284   | -1.859   | 0.287    |
| C              | -1.714   | 1.446    | 0.312    | H           | -4.478   | 1.329    | -0.067   |
| C              | 0.155    | 3.148    | -0.698   | H           | -2.553   | 0.144    | 1.874    |
| C              | -3.634   | -0.546   | -0.954   | H           | 0.509    | 1.445    | -1.991   |
| C              | -2.31    | -0.856   | -0.149   | H           | -6.686   | -0.327   | -0.348   |
| C              | -4.105   | 0.345    | 0.239    | H           | 2.573    | 2.141    | -0.168   |
| C              | -2.654   | 0.327    | 0.803    | H           | -0.338   | 4.646    | 2.492    |
| C              | 0.556    | 1.639    | -0.914   | H           | 1.236    | 4.528    | 1.685    |
| C              | -6.237   | -1.055   | 0.346    | H           | -0.022   | 5.549    | 1        |
| C              | 1.976    | 1.255    | -0.4     | H           | 1.538    | 3.838    | -2.226   |
| C              | -0.42    | 0.717    | -0.156   | H           | 0.821    | 5.14     | -1.271   |
| C              | 0.154    | 4.596    | 1.515    | H           | 2.116    | 4.157    | -0.585   |
| C              | 1.222    | 4.123    | -1.216   | H           | -7.826   | -0.788   | 1.814    |
| C              | -7.348   | -1.598   | 1.251    | H           | -8.123   | -2.108   | 0.666    |
| C              | 2.769    | 0.394    | -1.413   | H           | -6.946   | -2.319   | 1.974    |
| N              | 1.691    | 0.544    | 0.841    | H           | 2.909    | 1.005    | -2.314   |
| N              | 6.319    | -0.144   | -0.456   | H           | 2.14     | -0.457   | -1.704   |
| O              | -4.224   | -2.308   | -2.445   | H           | 2.423    | 0.205    | 1.453    |
| O              | -0.505   | -1.123   | -1.79    | H           | 7.295    | 0.115    | -0.456   |
| Conformation 3 |          |          |          |             |          |          |          |
| <b>Atom</b>    | <b>X</b> | <b>Y</b> | <b>Z</b> | <b>Atom</b> | <b>X</b> | <b>Y</b> | <b>Z</b> |
| C              | 6.924    | 0.401    | 0.395    | O           | -1.233   | 1.404    | 2.634    |
| C              | 7.472    | -0.452   | -0.588   | H           | 7.535    | 1.2      | 0.805    |
| C              | 5.619    | 0.232    | 0.845    | H           | 8.495    | -0.296   | -0.92    |
| C              | 6.728    | -1.491   | -1.137   | H           | 5.212    | 0.894    | 1.605    |
| C              | 4.837    | -0.808   | 0.307    | H           | 7.149    | -2.151   | -1.89    |
| C              | 5.414    | -1.658   | -0.681   | H           | -1.768   | 3.499    | -0.274   |
| C              | -1.113   | 2.668    | -0.528   | H           | 2.445    | -2.991   | -0.418   |
| C              | 3.311    | -2.354   | -0.296   | H           | -6.676   | -2.594   | -0.404   |
| C              | 3.489    | -1.274   | 0.537    | H           | -6.124   | -1.705   | 1.012    |
| C              | 0.161    | 2.854    | -0.918   | H           | -5.5     | 0.702    | 0.868    |
| C              | -4.595   | -2.149   | -0.391   | H           | -5.844   | 1.664    | -0.562   |
| C              | -1.267   | -0.883   | 0.656    | H           | -1.568   | 0.788    | -1.395   |
| C              | -0.346   | 1.084    | 1.846    | H           | 0.438    | 1.153    | -2.145   |
| C              | -6.033   | -1.766   | -0.085   | H           | -2.912   | -1.35    | -1.389   |
| C              | -5.497   | 0.677    | -0.232   | H           | -3.211   | -0.878   | 1.629    |
| C              | -1.59    | 1.251    | -0.393   | H           | -3.981   | 0.827    | -1.775   |
| C              | 0.962    | 1.597    | -1.283   | H           | -3.25    | 1.614    | 1.004    |
| C              | -3.587   | -1.032   | -0.589   | H           | 1.089    | -0.48    | -0.68    |
| C              | -2.761   | -0.578   | 0.679    | H           | -6.413   | -0.498   | -1.788   |
| C              | -4.071   | 0.445    | -0.752   | H           | 2.645    | 1.342    | 0.793    |
| C              | -2.955   | 0.9      | 0.233    | H           | 1.658    | 4.335    | -0.407   |
| C              | 0.871    | 0.47     | -0.183   | H           | 0.053    | 4.998    | -0.764   |

|                |          |          |          |             |          |          |          |
|----------------|----------|----------|----------|-------------|----------|----------|----------|
| C              | -6.472   | -0.418   | -0.691   | H           | 1.103    | 4.429    | -2.074   |
| C              | 1.845    | 0.633    | 1.019    | H           | 3.008    | 2.379    | -1.018   |
| C              | -0.541   | 0.454    | 0.441    | H           | 2.404    | 2.446    | -2.675   |
| C              | 0.773    | 4.224    | -1.047   | H           | 2.898    | 0.898    | -1.978   |
| C              | 2.4      | 1.848    | -1.757   | H           | -8.028   | 0.01     | 0.774    |
| C              | -7.922   | -0.095   | -0.313   | H           | -8.605   | -0.887   | -0.642   |
| C              | 2.478    | -0.703   | 1.489    | H           | -8.247   | 0.845    | -0.774   |
| N              | 0.985    | 1.197    | 2.054    | H           | 1.667    | -1.423   | 1.647    |
| N              | 4.458    | -2.587   | -1.028   | H           | 2.944    | -0.525   | 2.468    |
| O              | -4.245   | -3.318   | -0.464   | H           | 1.337    | 1.495    | 2.956    |
| O              | -0.751   | -1.979   | 0.758    | H           | 4.578    | -3.333   | -1.697   |
| Conformation 4 |          |          |          |             |          |          |          |
| <b>Atom</b>    | <b>X</b> | <b>Y</b> | <b>Z</b> | <b>Atom</b> | <b>X</b> | <b>Y</b> | <b>Z</b> |
| C              | 3.428    | -3.482   | -0.765   | O           | -1.276   | 2.114    | 2.39     |
| C              | 4.719    | -3.558   | -1.333   | H           | 2.72     | -4.285   | -0.949   |
| C              | 3.05     | -2.4     | 0.023    | H           | 4.984    | -4.417   | -1.944   |
| C              | 5.658    | -2.554   | -1.122   | H           | 2.052    | -2.35    | 0.451    |
| C              | 3.977    | -1.365   | 0.253    | H           | 6.653    | -2.61    | -1.555   |
| C              | 5.274    | -1.466   | -0.327   | H           | -1.905   | 3.523    | -0.898   |
| C              | -1.131   | 2.761    | -0.96    | H           | 5.569    | 1.364    | 1.272    |
| C              | 5.182    | 0.443    | 0.858    | H           | -5.936   | -3.116   | 0.02     |
| C              | 3.94     | -0.132   | 1.008    | H           | -5.579   | -1.908   | 1.252    |
| C              | 0.127    | 3.046    | -1.341   | H           | -5.29    | 0.495    | 0.665    |
| C              | -3.938   | -2.385   | -0.01    | H           | -5.682   | 1.112    | -0.934   |
| C              | -0.887   | -0.482   | 0.903    | H           | -1.282   | 0.704    | -1.449   |
| C              | -0.308   | 1.782    | 1.71     | H           | 0.698    | 1.195    | -2.189   |
| C              | -5.428   | -2.16    | 0.189    | H           | -2.319   | -1.544   | -1.076   |
| C              | -5.223   | 0.265    | -0.409   | H           | -2.874   | -0.572   | 1.783    |
| C              | -1.423   | 1.343    | -0.56    | H           | -3.658   | 0.341    | -1.908   |
| C              | 1.107    | 1.868    | -1.42    | H           | -3.196   | 1.733    | 0.684    |
| C              | -3.081   | -1.188   | -0.376   | H           | 1.477    | -0.008   | -0.408   |
| C              | -2.406   | -0.392   | 0.811    | H           | -5.889   | -1.298   | -1.733   |
| C              | -3.752   | 0.147    | -0.834   | H           | 2.666    | 2.291    | 0.717    |
| C              | -2.766   | 0.933    | 0.078    | H           | 1.385    | 4.794    | -1.102   |
| C              | 1.103    | 0.977    | -0.118   | H           | -0.274   | 5.142    | -1.622   |
| C              | -6.014   | -1.025   | -0.674   | H           | 0.908    | 4.482    | -2.766   |
| C              | 1.973    | 1.516    | 1.056    | H           | 3.013    | 2.969    | -1.259   |
| C              | -0.33    | 0.877    | 0.449    | H           | 2.502    | 2.621    | -2.912   |
| C              | 0.557    | 4.437    | -1.727   | H           | 3.157    | 1.328    | -1.9     |
| C              | 2.524    | 2.222    | -1.893   | H           | -7.687   | -0.558   | 0.644    |
| C              | -7.512   | -0.848   | -0.401   | H           | -8.063   | -1.777   | -0.587   |
| C              | 2.789    | 0.427    | 1.799    | H           | -7.938   | -0.067   | -1.042   |
| N              | 0.979    | 2.121    | 1.938    | H           | 2.103    | -0.376   | 2.091    |

|   |        |        |       |   |       |        |        |
|---|--------|--------|-------|---|-------|--------|--------|
| N | 5.981  | -0.348 | 0.057 | H | 3.164 | 0.876  | 2.728  |
| O | -3.432 | -3.489 | 0.129 | H | 1.23  | 2.639  | 2.772  |
| O | -0.244 | -1.454 | 1.25  | H | 6.94  | -0.146 | -0.186 |

**Table S12.** Optimized the coordinates of enantiomer of compound **1** at B3LYP/6-31G(d) level in methanol

| Conformation 1 |        |        |        |      |        |        |        |
|----------------|--------|--------|--------|------|--------|--------|--------|
| Atom           | X      | Y      | Z      | Atom | X      | Y      | Z      |
| C              | -7.007 | 0.664  | -0.465 | O    | 0.499  | -0.456 | 2.245  |
| C              | -7.767 | -0.227 | 0.324  | H    | -7.479 | 1.559  | -0.861 |
| C              | -5.667 | 0.413  | -0.742 | H    | -8.812 | -0.004 | 0.523  |
| C              | -7.204 | -1.385 | 0.849  | H    | -5.095 | 1.106  | -1.353 |
| C              | -5.066 | -0.749 | -0.223 | H    | -7.788 | -2.073 | 1.454  |
| C              | -5.855 | -1.634 | 0.568  | H    | 1.662  | 2.972  | 1.657  |
| C              | 1.205  | 2.571  | 0.755  | H    | -3.001 | -3.219 | 0.584  |
| C              | -3.782 | -2.491 | 0.411  | H    | 5.936  | -2.332 | 0.653  |
| C              | -3.741 | -1.321 | -0.311 | H    | 6.982  | -2.228 | -0.76  |
| C              | 0.103  | 3.115  | 0.207  | H    | 5.799  | 1.299  | 1.479  |
| C              | 4.962  | -1.658 | -1.108 | H    | 5.145  | -0.294 | 1.835  |
| C              | 1.352  | -0.919 | -0.599 | H    | 2.087  | 1.611  | -0.916 |
| C              | -0.076 | -0.078 | 1.226  | H    | 0.395  | 2.592  | -1.823 |
| C              | 6.19   | -1.701 | -0.215 | H    | 3.599  | -0.23  | -1.862 |
| C              | 5.474  | 0.36   | 1.014  | H    | 2.882  | -1.763 | 0.695  |
| C              | 1.758  | 1.337  | 0.102  | H    | 4.476  | 1.588  | -0.469 |
| C              | -0.413 | 2.467  | -1.085 | H    | 2.876  | 0.543  | 1.821  |
| C              | 3.951  | -0.55  | -0.877 | H    | -0.531 | 0.496  | -1.977 |
| C              | 2.726  | -0.884 | 0.064  | H    | 6.929  | 0.293  | -0.572 |
| C              | 4.3    | 0.647  | 0.066  | H    | -2.591 | 1.234  | -0.164 |
| C              | 2.898  | 0.512  | 0.731  | H    | -0.591 | 5.167  | 0.083  |
| C              | -0.56  | 0.904  | -0.961 | H    | -0.06  | 4.659  | 1.697  |
| C              | 6.649  | -0.322 | 0.297  | H    | -1.621 | 4.121  | 1.052  |
| C              | -1.869 | 0.419  | -0.269 | H    | -2.512 | 3.15   | -1.037 |
| C              | 0.593  | 0.326  | -0.114 | H    | -1.947 | 2.595  | -2.619 |
| C              | -0.575 | 4.327  | 0.79   | H    | -1.432 | 4.164  | -1.993 |
| C              | -1.649 | 3.13   | -1.71  | H    | 7.647  | -1.053 | 2.093  |
| C              | 7.879  | -0.454 | 1.203  | H    | 8.224  | 0.529  | 1.541  |
| C              | -2.548 | -0.75  | -1.022 | H    | 8.708  | -0.942 | 0.678  |
| N              | -1.411 | 0.025  | 1.058  | H    | -1.796 | -1.53  | -1.19  |
| N              | -5.043 | -2.683 | 0.94   | H    | -2.84  | -0.374 | -2.013 |
| O              | 4.774  | -2.494 | -1.98  | H    | -2.048 | -0.308 | 1.771  |
| O              | 0.943  | -1.758 | -1.378 | H    | -5.324 | -3.476 | 1.496  |
| Conformation 2 |        |        |        |      |        |        |        |
| Atom           | X      | Y      | Z      | Atom | X      | Y      | Z      |

|                |          |          |          |             |          |          |          |
|----------------|----------|----------|----------|-------------|----------|----------|----------|
| C              | -4.217   | -3.35    | 1.068    | O           | 0.022    | -0.468   | 1.995    |
| C              | -5.606   | -3.333   | 1.319    | H           | -3.619   | -4.176   | 1.445    |
| C              | -3.604   | -2.331   | 0.348    | H           | -6.057   | -4.144   | 1.886    |
| C              | -6.41    | -2.298   | 0.852    | H           | -2.534   | -2.358   | 0.162    |
| C              | -4.388   | -1.266   | -0.136   | H           | -7.48    | -2.284   | 1.041    |
| C              | -5.789   | -1.274   | 0.127    | H           | 1.765    | 2.731    | 2.169    |
| C              | 1.318    | 2.602    | 1.185    | H           | -5.535   | 1.481    | -1.605   |
| C              | -5.311   | 0.564    | -1.077   | H           | 5.18     | -2.935   | 0.204    |
| C              | -4.105   | -0.077   | -0.91    | H           | 6.338    | -2.712   | -1.104   |
| C              | 0.361    | 3.424    | 0.72     | H           | 5.571    | 0.4      | 1.825    |
| C              | 4.47     | -1.734   | -1.394   | H           | 4.638    | -1.089   | 1.785    |
| C              | 0.996    | -0.527   | -0.851   | H           | 2.16     | 1.856    | -0.611   |
| C              | -0.405   | 0.186    | 1.046    | H           | 0.714    | 3.28     | -1.362   |
| C              | 5.601    | -2.186   | -0.486   | H           | 3.406    | 0.032    | -1.855   |
| C              | 5.135    | -0.343   | 1.147    | H           | 2.284    | -1.859   | 0.287    |
| C              | 1.714    | 1.446    | 0.312    | H           | 4.478    | 1.329    | -0.068   |
| C              | -0.156   | 3.148    | -0.698   | H           | 2.553    | 0.144    | 1.874    |
| C              | 3.634    | -0.547   | -0.954   | H           | -0.509   | 1.445    | -1.991   |
| C              | 2.31     | -0.856   | -0.149   | H           | 6.686    | -0.327   | -0.349   |
| C              | 4.105    | 0.345    | 0.239    | H           | -2.573   | 2.141    | -0.168   |
| C              | 2.654    | 0.327    | 0.803    | H           | 0.022    | 5.549    | 1        |
| C              | -0.556   | 1.639    | -0.915   | H           | 0.338    | 4.646    | 2.492    |
| C              | 6.237    | -1.054   | 0.345    | H           | -1.236   | 4.528    | 1.685    |
| C              | -1.976   | 1.255    | -0.4     | H           | -2.116   | 4.157    | -0.584   |
| C              | 0.42     | 0.717    | -0.156   | H           | -1.538   | 3.838    | -2.226   |
| C              | -0.154   | 4.596    | 1.515    | H           | -0.822   | 5.14     | -1.271   |
| C              | -1.222   | 4.123    | -1.216   | H           | 6.946    | -2.318   | 1.974    |
| C              | 7.348    | -1.598   | 1.251    | H           | 7.827    | -0.788   | 1.813    |
| C              | -2.769   | 0.394    | -1.413   | H           | 8.124    | -2.107   | 0.666    |
| N              | -1.691   | 0.544    | 0.841    | H           | -2.14    | -0.457   | -1.704   |
| N              | -6.319   | -0.144   | -0.457   | H           | -2.909   | 1.005    | -2.314   |
| O              | 4.223    | -2.31    | -2.444   | H           | -2.423   | 0.205    | 1.453    |
| O              | 0.506    | -1.123   | -1.79    | H           | -7.295   | 0.114    | -0.456   |
| Conformation 3 |          |          |          |             |          |          |          |
| <b>Atom</b>    | <b>X</b> | <b>Y</b> | <b>Z</b> | <b>Atom</b> | <b>X</b> | <b>Y</b> | <b>Z</b> |
| C              | -6.924   | 0.401    | 0.395    | O           | 1.233    | 1.404    | 2.635    |
| C              | -7.472   | -0.452   | -0.588   | H           | -7.535   | 1.201    | 0.805    |
| C              | -5.619   | 0.232    | 0.845    | H           | -8.495   | -0.296   | -0.92    |
| C              | -6.727   | -1.491   | -1.137   | H           | -5.212   | 0.894    | 1.605    |
| C              | -4.837   | -0.808   | 0.307    | H           | -7.149   | -2.151   | -1.89    |
| C              | -5.414   | -1.658   | -0.681   | H           | 1.768    | 3.499    | -0.274   |
| C              | 1.113    | 2.668    | -0.528   | H           | -2.445   | -2.991   | -0.418   |
| C              | -3.311   | -2.354   | -0.296   | H           | 6.124    | -1.705   | 1.012    |

|                |          |          |          |             |          |          |          |
|----------------|----------|----------|----------|-------------|----------|----------|----------|
| C              | -3.489   | -1.274   | 0.537    | H           | 6.676    | -2.594   | -0.404   |
| C              | -0.161   | 2.854    | -0.918   | H           | 5.844    | 1.664    | -0.562   |
| C              | 4.595    | -2.149   | -0.392   | H           | 5.5      | 0.702    | 0.868    |
| C              | 1.267    | -0.883   | 0.656    | H           | 1.568    | 0.788    | -1.395   |
| C              | 0.346    | 1.084    | 1.846    | H           | -0.438   | 1.153    | -2.145   |
| C              | 6.033    | -1.766   | -0.085   | H           | 2.912    | -1.35    | -1.389   |
| C              | 5.497    | 0.677    | -0.232   | H           | 3.211    | -0.879   | 1.629    |
| C              | 1.59     | 1.251    | -0.393   | H           | 3.981    | 0.827    | -1.775   |
| C              | -0.962   | 1.597    | -1.283   | H           | 3.25     | 1.614    | 1.004    |
| C              | 3.587    | -1.032   | -0.589   | H           | -1.089   | -0.48    | -0.68    |
| C              | 2.761    | -0.578   | 0.679    | H           | 6.413    | -0.497   | -1.787   |
| C              | 4.071    | 0.445    | -0.752   | H           | -2.646   | 1.342    | 0.793    |
| C              | 2.955    | 0.9      | 0.233    | H           | -1.103   | 4.429    | -2.074   |
| C              | -0.871   | 0.47     | -0.183   | H           | -0.053   | 4.998    | -0.764   |
| C              | 6.472    | -0.418   | -0.691   | H           | -1.658   | 4.335    | -0.407   |
| C              | -1.845   | 0.633    | 1.019    | H           | -3.008   | 2.378    | -1.018   |
| C              | 0.541    | 0.454    | 0.441    | H           | -2.899   | 0.898    | -1.978   |
| C              | -0.773   | 4.224    | -1.047   | H           | -2.404   | 2.446    | -2.675   |
| C              | -2.4     | 1.848    | -1.757   | H           | 8.028    | 0.01     | 0.774    |
| C              | 7.922    | -0.094   | -0.313   | H           | 8.247    | 0.845    | -0.774   |
| C              | -2.478   | -0.703   | 1.489    | H           | 8.605    | -0.886   | -0.642   |
| N              | -0.985   | 1.197    | 2.054    | H           | -2.944   | -0.525   | 2.468    |
| N              | -4.458   | -2.587   | -1.028   | H           | -1.667   | -1.423   | 1.647    |
| O              | 4.245    | -3.318   | -0.464   | H           | -1.337   | 1.495    | 2.956    |
| O              | 0.751    | -1.979   | 0.758    | H           | -4.578   | -3.334   | -1.697   |
| Conformation 4 |          |          |          |             |          |          |          |
| <b>Atom</b>    | <b>X</b> | <b>Y</b> | <b>Z</b> | <b>Atom</b> | <b>X</b> | <b>Y</b> | <b>Z</b> |
| C              | -3.428   | -3.482   | -0.765   | O           | 1.276    | 2.114    | 2.39     |
| C              | -4.719   | -3.558   | -1.332   | H           | -2.72    | -4.285   | -0.949   |
| C              | -3.05    | -2.4     | 0.023    | H           | -4.985   | -4.416   | -1.944   |
| C              | -5.658   | -2.554   | -1.122   | H           | -2.052   | -2.35    | 0.451    |
| C              | -3.977   | -1.365   | 0.254    | H           | -6.653   | -2.61    | -1.555   |
| C              | -5.274   | -1.466   | -0.327   | H           | 1.905    | 3.523    | -0.898   |
| C              | 1.131    | 2.761    | -0.96    | H           | -5.569   | 1.364    | 1.272    |
| C              | -5.182   | 0.443    | 0.858    | H           | 5.579    | -1.909   | 1.252    |
| C              | -3.94    | -0.132   | 1.008    | H           | 5.936    | -3.116   | 0.02     |
| C              | -0.127   | 3.046    | -1.341   | H           | 5.682    | 1.112    | -0.934   |
| C              | 3.938    | -2.385   | -0.01    | H           | 5.29     | 0.495    | 0.665    |
| C              | 0.887    | -0.482   | 0.903    | H           | 1.282    | 0.704    | -1.449   |
| C              | 0.308    | 1.782    | 1.71     | H           | -0.698   | 1.195    | -2.189   |
| C              | 5.428    | -2.161   | 0.189    | H           | 2.319    | -1.544   | -1.076   |
| C              | 5.223    | 0.265    | -0.409   | H           | 2.874    | -0.572   | 1.783    |
| C              | 1.423    | 1.343    | -0.56    | H           | 3.658    | 0.342    | -1.908   |

|   |        |        |        |   |        |        |        |
|---|--------|--------|--------|---|--------|--------|--------|
| C | -1.107 | 1.868  | -1.42  | H | 3.196  | 1.733  | 0.684  |
| C | 3.081  | -1.188 | -0.376 | H | -1.477 | -0.009 | -0.408 |
| C | 2.406  | -0.392 | 0.811  | H | 5.889  | -1.298 | -1.733 |
| C | 3.752  | 0.147  | -0.834 | H | -2.666 | 2.291  | 0.717  |
| C | 2.766  | 0.933  | 0.078  | H | -0.908 | 4.482  | -2.766 |
| C | -1.103 | 0.977  | -0.118 | H | 0.274  | 5.142  | -1.622 |
| C | 6.015  | -1.025 | -0.674 | H | -1.385 | 4.794  | -1.102 |
| C | -1.973 | 1.516  | 1.056  | H | -3.013 | 2.969  | -1.26  |
| C | 0.33   | 0.877  | 0.449  | H | -3.157 | 1.328  | -1.9   |
| C | -0.557 | 4.437  | -1.727 | H | -2.501 | 2.621  | -2.912 |
| C | -2.524 | 2.222  | -1.893 | H | 7.687  | -0.558 | 0.644  |
| C | 7.512  | -0.848 | -0.4   | H | 7.938  | -0.067 | -1.041 |
| C | -2.789 | 0.427  | 1.799  | H | 8.063  | -1.777 | -0.587 |
| N | -0.979 | 2.121  | 1.938  | H | -3.163 | 0.876  | 2.728  |
| N | -5.981 | -0.348 | 0.057  | H | -2.103 | -0.376 | 2.091  |
| O | 3.432  | -3.489 | 0.129  | H | -1.23  | 2.639  | 2.772  |
| O | 0.244  | -1.454 | 1.25   | H | -6.94  | -0.146 | -0.185 |

**Table S13.** Optimized the coordinates of compound **1** at B3LYP/6-31G(d) level in methanol

| Conformation 1 |        |        |        |      |        |        |        |
|----------------|--------|--------|--------|------|--------|--------|--------|
| Atom           | X      | Y      | Z      | Atom | X      | Y      | Z      |
| C              | -7.043 | 0.86   | 0.057  | O    | 3.172  | -2.396 | 1.511  |
| C              | -7.778 | -0.038 | -0.746 | H    | -7.493 | 1.806  | 0.346  |
| C              | -5.755 | 0.554  | 0.482  | H    | -8.782 | 0.229  | -1.063 |
| C              | -7.242 | -1.261 | -1.135 | H    | -5.202 | 1.254  | 1.104  |
| C              | -5.181 | -0.674 | 0.102  | H    | -7.808 | -1.956 | -1.751 |
| C              | -5.945 | -1.566 | -0.704 | H    | 1.363  | 2.801  | -1.548 |
| C              | 0.954  | 2.433  | -0.609 | H    | -3.211 | -3.311 | -0.327 |
| C              | -3.956 | -2.528 | -0.283 | H    | 5.132  | 3.095  | -2.072 |
| C              | -3.911 | -1.312 | 0.36   | H    | 4.159  | 1.751  | -2.891 |
| C              | -0.165 | 2.944  | -0.072 | H    | 6.192  | -0.179 | 1.144  |
| C              | 1.309  | -0.897 | 1.224  | H    | 4.217  | 2.472  | 0.102  |
| C              | 0.044  | -0.45  | -0.88  | H    | 7.143  | -1.795 | -1.278 |
| C              | 4.427  | 2.274  | -1.976 | H    | 1.971  | 1.685  | 1.101  |
| C              | 6.141  | -0.739 | 0.213  | H    | 0.206  | 2.53   | 1.977  |
| C              | 3.919  | 1.922  | -0.793 | H    | 2.338  | -1.932 | -0.325 |
| C              | 7.254  | -1.242 | -0.346 | H    | 2.691  | 0.339  | -1.536 |
| C              | 4.81   | -0.927 | -0.403 | H    | 3.912  | 0.127  | 1.265  |
| C              | 1.659  | 1.312  | 0.11   | H    | -0.702 | 0.369  | 2.156  |
| C              | -0.603 | 2.33   | 1.257  | H    | -2.526 | 1.079  | 0.014  |
| C              | 2.595  | -1.454 | 0.631  | H    | -0.475 | 4.367  | -1.657 |
| C              | 2.946  | 0.788  | -0.573 | H    | -1.977 | 3.776  | -0.923 |

|                |          |          |          |             |          |          |          |
|----------------|----------|----------|----------|-------------|----------|----------|----------|
| C              | 3.595    | -0.315   | 0.312    | H           | -0.988   | 4.947    | -0.062   |
| C              | -0.657   | 0.774    | 1.141    | H           | 8.659    | -0.543   | 1.137    |
| C              | -1.89    | 0.25     | 0.342    | H           | 9.074    | -2.102   | 0.381    |
| C              | 0.598    | 0.189    | 0.426    | H           | 9.292    | -0.614   | -0.526   |
| C              | -0.939   | 4.064    | -0.713   | H           | -2.096   | 2.418    | 2.833    |
| C              | 8.637    | -1.11    | 0.202    | H           | -1.738   | 3.986    | 2.101    |
| C              | -1.873   | 2.921    | 1.885    | H           | -2.754   | 2.828    | 1.241    |
| C              | -2.757   | -0.75    | 1.141    | H           | -3.123   | -0.228   | 2.035    |
| N              | -1.299   | -0.366   | -0.836   | H           | -2.107   | -1.56    | 1.493    |
| N              | -5.17    | -2.684   | -0.922   | H           | -1.864   | -0.778   | -1.569   |
| O              | 0.921    | -1.314   | 2.307    | H           | -5.446   | -3.498   | -1.451   |
| O              | 0.702    | -0.959   | -1.786   | H           | 2.574    | -2.422   | 2.285    |
| O              | 4.642    | -1.544   | -1.451   |             |          |          |          |
| Conformation 2 |          |          |          |             |          |          |          |
| <b>Atom</b>    | <b>X</b> | <b>Y</b> | <b>Z</b> | <b>Atom</b> | <b>X</b> | <b>Y</b> | <b>Z</b> |
| C              | -6.898   | 0.606    | -0.508   | O           | 3.199    | -1.689   | 2.432    |
| C              | -7.531   | -0.507   | -1.102   | H           | -7.405   | 1.568    | -0.509   |
| C              | -5.642   | 0.491    | 0.077    | H           | -8.512   | -0.387   | -1.552   |
| C              | -6.921   | -1.758   | -1.119   | H           | -5.169   | 1.357    | 0.534    |
| C              | -4.996   | -0.759   | 0.073    | H           | -7.408   | -2.616   | -1.573   |
| C              | -5.657   | -1.869   | -0.528   | H           | 1.55     | 2.577    | -1.901   |
| C              | 1.071    | 2.426    | -0.937   | H           | -2.906   | -3.305   | 0.489    |
| C              | -3.679   | -2.579   | 0.274    | H           | 5.338    | 2.892    | -2.193   |
| C              | -3.731   | -1.239   | 0.581    | H           | 4.423    | 1.39     | -2.769   |
| C              | -0.103   | 3        | -0.629   | H           | 3.996    | -1.811   | -1.185   |
| C              | 1.351    | -0.336   | 1.68     | H           | 4.302    | 2.717    | 0.009    |
| C              | 0.252    | -0.473   | -0.562   | H           | 6.991    | -2.025   | -0.594   |
| C              | 4.634    | 2.096    | -1.968   | H           | 1.972    | 2.15     | 0.972    |
| C              | 4.952    | -1.614   | -0.705   | H           | 0.099    | 3.114    | 1.48     |
| C              | 4.059    | 1.99     | -0.768   | H           | 2.45     | -1.714   | 0.509    |
| C              | 6.059    | -2.259   | -1.108   | H           | 2.889    | 0.266    | -1.233   |
| C              | 4.994    | -0.619   | 0.393    | H           | 3.92     | 0.718    | 1.629    |
| C              | 1.74     | 1.54     | 0.082    | H           | -0.757   | 1.028    | 2.12     |
| C              | -0.64    | 2.708    | 0.77     | H           | -2.44    | 1.092    | -0.235   |
| C              | 2.67     | -1.004   | 1.317    | H           | -1.853   | 3.518    | -1.8     |
| C              | 3.081    | 0.91     | -0.371   | H           | -0.307   | 3.989    | -2.531   |
| C              | 3.675    | 0.056    | 0.79     | H           | -0.976   | 4.907    | -1.169   |
| C              | -0.644   | 1.17     | 1.042    | H           | 6.509    | -4.228   | -1.82    |
| C              | -1.792   | 0.403    | 0.316    | H           | 5.148    | -3.447   | -2.664   |
| C              | 0.679    | 0.485    | 0.586    | H           | 6.828    | -2.95    | -2.982   |
| C              | -0.846   | 3.898    | -1.582   | H           | -2.796   | 3.08     | 0.471    |
| C              | 6.125    | -3.273   | -2.203   | H           | -1.889   | 4.464    | 1.083    |
| C              | -1.975   | 3.373    | 1.133    | H           | -2.262   | 3.112    | 2.158    |

|                |          |          |          |             |          |          |          |
|----------------|----------|----------|----------|-------------|----------|----------|----------|
| C              | -2.669   | -0.435   | 1.276    | H           | -3.126   | 0.257    | 1.995    |
| N              | -1.09    | -0.436   | -0.645   | H           | -2.01    | -1.097   | 1.851    |
| N              | -4.827   | -2.961   | -0.39    | H           | -1.582   | -1.042   | -1.29    |
| O              | 0.917    | -0.451   | 2.818    | H           | -5.03    | -3.898   | -0.706   |
| O              | 0.996    | -1.158   | -1.264   | H           | 2.585    | -1.494   | 3.168    |
| O              | 6.033    | -0.323   | 0.975    |             |          |          |          |
|                |          |          |          |             |          |          |          |
| Conformation 3 |          |          |          |             |          |          |          |
| <b>Atom</b>    | <b>X</b> | <b>Y</b> | <b>Z</b> | <b>Atom</b> | <b>X</b> | <b>Y</b> | <b>Z</b> |
| C              | -4.368   | -3.493   | -0.749   | O           | 2.542    | -2.12    | 1.985    |
| C              | -5.698   | -3.439   | -1.219   | H           | -3.789   | -4.401   | -0.897   |
| C              | -3.79    | -2.407   | -0.103   | H           | -6.122   | -4.304   | -1.722   |
| C              | -6.476   | -2.299   | -1.048   | H           | -2.765   | -2.463   | 0.255    |
| C              | -4.549   | -1.235   | 0.084    | H           | -7.501   | -2.256   | -1.407   |
| C              | -5.891   | -1.208   | -0.396   | H           | 1.571    | 2.65     | -2.014   |
| C              | 1.143    | 2.547    | -1.019   | H           | -5.68    | 1.772    | 0.92     |
| C              | -5.454   | 0.771    | 0.579    | H           | 5.297    | 2.125    | -2.627   |
| C              | -4.291   | 0.045    | 0.705    | H           | 4.056    | 0.858    | -3.159   |
| C              | 0.159    | 3.348    | -0.581   | H           | 5.905    | -0.57    | 1.136    |
| C              | 0.972    | -0.383   | 1.424    | H           | 4.391    | 2.105    | -0.363   |
| C              | -0.281   | -0.118   | -0.722   | H           | 6.439    | -2.797   | -0.898   |
| C              | 4.46     | 1.483    | -2.365   | H           | 2.082    | 1.957    | 0.794    |
| C              | 5.71     | -1.294   | 0.348    | H           | 0.537    | 3.263    | 1.506    |
| C              | 3.955    | 1.462    | -1.13    | H           | 1.726    | -1.87    | 0.1      |
| C              | 6.692    | -2.09    | -0.109   | H           | 2.426    | 0.024    | -1.535   |
| C              | 4.336    | -1.37    | -0.191   | H           | 3.712    | 0.13     | 1.244    |
| C              | 1.665    | 1.468    | -0.103   | H           | -0.74    | 1.38     | 2.102    |
| C              | -0.325   | 3.086    | 0.844    | H           | -2.491   | 2.004    | -0.129   |
| C              | 2.107    | -1.273   | 0.941    | H           | 0.042    | 4.482    | -2.407   |
| C              | 2.803    | 0.594    | -0.682   | H           | -1.509   | 4.325    | -1.562   |
| C              | 3.281    | -0.421   | 0.399    | H           | -0.29    | 5.434    | -0.948   |
| C              | -0.665   | 1.573    | 1.028    | H           | 8.379    | -3.083   | 0.756    |
| C              | -2.005   | 1.148    | 0.351    | H           | 8.794    | -1.879   | -0.453   |
| C              | 0.433    | 0.642    | 0.433    | H           | 8.271    | -1.353   | 1.167    |
| C              | -0.428   | 4.452    | -1.419   | H           | -1.697   | 3.748    | 2.392    |
| C              | 8.105    | -2.09    | 0.375    | H           | -1.114   | 5.051    | 1.352    |
| C              | -1.441   | 4.007    | 1.358    | H           | -2.357   | 3.946    | 0.762    |
| C              | -3.013   | 0.517    | 1.34     | H           | -3.236   | 1.275    | 2.101    |
| N              | -1.584   | 0.218    | -0.687   | H           | -2.511   | -0.31    | 1.859    |
| N              | -6.411   | 0.029    | -0.081   | H           | -2.238   | -0.205   | -1.334   |
| O              | 0.567    | -0.5     | 2.573    | H           | -7.351   | 0.338    | -0.278   |
| O              | 0.237    | -0.9     | -1.517   | H           | 1.992    | -1.877   | 2.756    |
| O              | 4.011    | -2.151   | -1.082   |             |          |          |          |



| Conformation 4 |        |        |        |      |        |        |        |
|----------------|--------|--------|--------|------|--------|--------|--------|
| Atom           | X      | Y      | Z      | Atom | X      | Y      | Z      |
| C              | -4.209 | -3.603 | -0.094 | O    | 2.817  | -1.331 | 2.742  |
| C              | -5.463 | -3.659 | -0.74  | H    | -3.647 | -4.521 | 0.055  |
| C              | -3.683 | -2.396 | 0.352  | H    | -5.847 | -4.617 | -1.08  |
| C              | -6.217 | -2.509 | -0.948 | H    | -2.717 | -2.37  | 0.849  |
| C              | -4.419 | -1.211 | 0.154  | H    | -7.184 | -2.549 | -1.442 |
| C              | -5.685 | -1.295 | -0.496 | H    | 1.682  | 2.396  | -2.229 |
| C              | 1.226  | 2.456  | -1.244 | H    | -5.545 | 1.911  | 0.098  |
| C              | -5.311 | 0.857  | 0.037  | H    | 5.42   | 1.929  | -2.697 |
| C              | -4.201 | 0.179  | 0.485  | H    | 4.234  | 0.537  | -2.985 |
| C              | 0.195  | 3.276  | -0.987 | H    | 3.338  | -2.257 | -0.826 |
| C              | 1.165  | 0.133  | 1.773  | H    | 4.497  | 2.295  | -0.469 |
| C              | -0.019 | -0.241 | -0.406 | H    | 6.288  | -2.902 | -0.319 |
| C              | 4.605  | 1.315  | -2.321 | H    | 2.148  | 2.282  | 0.661  |
| C              | 4.345  | -2.154 | -0.427 | H    | 0.49   | 3.594  | 1.095  |
| C              | 4.091  | 1.506  | -1.104 | H    | 1.971  | -1.609 | 0.881  |
| C              | 5.295  | -3.05  | -0.744 | H    | 2.63   | -0.043 | -1.238 |
| C              | 4.631  | -1.004 | 0.464  | H    | 3.883  | 0.697  | 1.47   |
| C              | 1.777  | 1.605  | -0.128 | H    | -0.774 | 1.77   | 1.958  |
| C              | -0.332 | 3.252  | 0.447  | H    | -2.274 | 1.873  | -0.563 |
| C              | 2.343  | -0.8   | 1.523  | H    | 0.092  | 4.046  | -2.995 |
| C              | 2.969  | 0.692  | -0.504 | H    | -1.479 | 3.98   | -2.174 |
| C              | 3.476  | -0.045 | 0.773  | H    | -0.323 | 5.235  | -1.748 |
| C              | -0.61  | 1.779  | 0.877  | H    | 4.088  | -4.309 | -2.016 |
| C              | -1.863 | 1.171  | 0.172  | H    | 5.802  | -4.191 | -2.483 |
| C              | 0.578  | 0.828  | 0.55   | H    | 5.349  | -5.162 | -1.091 |
| C              | -0.409 | 4.178  | -2.031 | H    | -1.797 | 4.11   | 1.801  |
| C              | 5.11   | -4.236 | -1.632 | H    | -1.252 | 5.225  | 0.544  |
| C              | -1.517 | 4.182  | 0.744  | H    | -2.404 | 3.948  | 0.146  |
| C              | -2.997 | 0.787  | 1.15   | H    | -3.291 | 1.701  | 1.681  |
| N              | -1.332 | 0.019  | -0.541 | H    | -2.586 | 0.103  | 1.904  |
| N              | -6.199 | -0.018 | -0.553 | H    | -1.916 | -0.581 | -1.112 |
| O              | 0.785  | 0.325  | 2.919  | H    | -7.095 | 0.238  | -0.942 |
| O              | 0.584  | -1.173 | -0.94  | H    | 2.29   | -0.887 | 3.437  |
| O              | 5.742  | -0.802 | 0.943  |      |        |        |        |
| Conformation 5 |        |        |        |      |        |        |        |
| Atom           | X      | Y      | Z      | Atom | X      | Y      | Z      |
| C              | 6.949  | 0.603  | 0.782  | O    | -2.975 | -2.803 | 0.208  |
| C              | 7.635  | 0.035  | -0.313 | H    | 7.45   | 1.348  | 1.395  |
| C              | 5.646  | 0.224  | 1.088  | H    | 8.652  | 0.35   | -0.527 |
| C              | 7.034  | -0.925 | -1.121 | H    | 5.131  | 0.668  | 1.937  |
| C              | 5.008  | -0.742 | 0.288  | H    | 7.561  | -1.365 | -1.962 |

|                |          |          |          |             |          |          |          |
|----------------|----------|----------|----------|-------------|----------|----------|----------|
| C              | 5.722    | -1.303   | -0.809   | H           | -1.508   | 3.304    | 0.11     |
| C              | -0.889   | 2.504    | -0.288   | H           | 2.895    | -2.918   | -1.059   |
| C              | 3.683    | -2.25    | -0.74    | H           | -5.2     | 3.574    | -0.879   |
| C              | 3.704    | -1.363   | 0.312    | H           | -4.677   | 3.035    | 0.814    |
| C              | 0.398    | 2.698    | -0.618   | H           | -5.647   | -1.074   | -1.764   |
| C              | -1.104   | -1.293   | 0.083    | H           | -3.772   | 1.875    | -1.892   |
| C              | -0.42    | 0.407    | 1.785    | H           | -7.47    | -1.017   | 0.697    |
| C              | -4.602   | 2.906    | -0.264   | H           | -1.444   | 0.854    | -1.518   |
| C              | -5.947   | -0.963   | -0.725   | H           | 0.597    | 1.208    | -2.108   |
| C              | -3.817   | 1.973    | -0.805   | H           | -2.642   | -1.269   | 1.556    |
| C              | -7.228   | -1.138   | -0.359   | H           | -3.055   | 1.218    | 1.044    |
| C              | -4.897   | -0.624   | 0.259    | H           | -3.422   | -0.687   | -1.327   |
| C              | -1.483   | 1.127    | -0.449   | H           | 1.203    | -0.645   | -0.848   |
| C              | 1.129    | 1.482    | -1.183   | H           | 2.573    | 1.054    | 0.991    |
| C              | -2.56    | -1.48    | 0.481    | H           | 1.957    | 3.967    | 0.19     |
| C              | -2.965   | 1        | -0.024   | H           | 0.4      | 4.778    | -0.061   |
| C              | -3.459   | -0.457   | -0.255   | H           | 1.453    | 4.402    | -1.438   |
| C              | 0.948    | 0.236    | -0.254   | H           | -9.139   | -0.722   | -1.229   |
| C              | 1.84     | 0.243    | 1.024    | H           | -8.024   | -1.591   | -2.314   |
| C              | -0.517   | 0.101    | 0.262    | H           | -8.825   | -2.429   | -0.961   |
| C              | 1.085    | 4.029    | -0.473   | H           | 3.225    | 2.042    | -0.773   |
| C              | -8.354   | -1.489   | -1.275   | H           | 2.648    | 2.472    | -2.385   |
| C              | 2.589    | 1.711    | -1.599   | H           | 3.018    | 0.786    | -1.996   |
| C              | 2.587    | -1.092   | 1.278    | H           | 1.855    | -1.907   | 1.243    |
| N              | 0.887    | 0.515    | 2.093    | H           | 2.981    | -1.064   | 2.304    |
| N              | 4.886    | -2.216   | -1.416   | H           | 1.17     | 0.66     | 3.055    |
| O              | -0.485   | -2.242   | -0.38    | H           | 5.12     | -2.788   | -2.214   |
| O              | -1.357   | 0.526    | 2.572    | H           | -2.195   | -3.239   | -0.19    |
| O              | -5.129   | -0.476   | 1.457    |             |          |          |          |
| Conformation 6 |          |          |          |             |          |          |          |
| <b>Atom</b>    | <b>X</b> | <b>Y</b> | <b>Z</b> | <b>Atom</b> | <b>X</b> | <b>Y</b> | <b>Z</b> |
| C              | 6.73     | 0.545    | 1.475    | O           | -2.952   | -2.831   | -0.954   |
| C              | 7.567    | 0.192    | 0.394    | H           | 7.123    | 1.177    | 2.266    |
| C              | 5.416    | 0.095    | 1.541    | H           | 8.59     | 0.559    | 0.369    |
| C              | 7.108    | -0.618   | -0.639   | H           | 4.784    | 0.371    | 2.381    |
| C              | 4.919    | -0.725   | 0.51     | H           | 7.752    | -0.892   | -1.471   |
| C              | 5.785    | -1.069   | -0.568   | H           | -1.633   | 3.2      | 0.246    |
| C              | -0.954   | 2.484    | -0.213   | H           | 3.078    | -2.667   | -1.452   |
| C              | 3.793    | -2.051   | -0.924   | H           | -5.182   | 3.648    | -1.073   |
| C              | 3.649    | -1.364   | 0.259    | H           | -4.803   | 2.85     | 0.554    |
| C              | 0.356    | 2.738    | -0.358   | H           | -4.686   | -0.629   | 1.459    |
| C              | -1.118   | -1.311   | -0.59    | H           | -3.666   | 2.112    | -2.213   |
| C              | -0.693   | 0.023    | 1.487    | H           | -7.389   | -1.166   | 0.127    |

|                |          |          |          |             |          |          |          |
|----------------|----------|----------|----------|-------------|----------|----------|----------|
| C              | -4.635   | 2.888    | -0.52    | H           | -1.342   | 1.081    | -1.77    |
| C              | -5.413   | -0.78    | 0.664    | H           | 0.752    | 1.53     | -2.051   |
| C              | -3.803   | 2.043    | -1.132   | H           | -2.76    | -1.624   | 0.708    |
| C              | -6.701   | -1.022   | 0.96     | H           | -3.204   | 1.004    | 0.635    |
| C              | -4.942   | -0.708   | -0.741   | H           | -3.313   | -0.465   | -2.064   |
| C              | -1.497   | 1.158    | -0.681   | H           | 1.27     | -0.51    | -1.057   |
| C              | 1.173    | 1.643    | -1.039   | H           | 2.342    | 0.872    | 1.206    |
| C              | -2.599   | -1.592   | -0.378   | H           | 0.249    | 4.687    | 0.55     |
| C              | -3.014   | 0.955    | -0.441   | H           | 1.79     | 3.854    | 0.823    |
| C              | -3.45    | -0.441   | -0.976   | H           | 1.45     | 4.565    | -0.749   |
| C              | 0.919    | 0.256    | -0.361   | H           | -8.07    | -0.367   | 2.47     |
| C              | 1.646    | 0.053    | 1.002    | H           | -7.741   | -2.092   | 2.495    |
| C              | -0.593   | 0.019    | -0.065   | H           | -6.516   | -0.955   | 3.11     |
| C              | 0.991    | 4.027    | 0.09     | H           | 2.79     | 2.835    | -1.869   |
| C              | -7.273   | -1.111   | 2.336    | H           | 3.198    | 2.126    | -0.304   |
| C              | 2.663    | 1.946    | -1.242   | H           | 3.154    | 1.108    | -1.747   |
| C              | 2.414    | -1.291   | 1.109    | H           | 1.726    | -2.101   | 0.842    |
| N              | 0.56     | 0.104    | 1.973    | H           | 2.68     | -1.441   | 2.165    |
| N              | 5.067    | -1.876   | -1.425   | H           | 0.719    | 0.064    | 2.973    |
| O              | -0.436   | -2.129   | -1.193   | H           | 5.419    | -2.292   | -2.275   |
| O              | -1.723   | -0.039   | 2.159    | H           | -2.135   | -3.157   | -1.383   |
| O              | -5.698   | -0.847   | -1.697   |             |          |          |          |
| Conformation 7 |          |          |          |             |          |          |          |
| <b>Atom</b>    | <b>X</b> | <b>Y</b> | <b>Z</b> | <b>Atom</b> | <b>X</b> | <b>Y</b> | <b>Z</b> |
| C              | 4.145    | -3.168   | -1.271   | O           | -2.373   | -2.667   | 0.991    |
| C              | 5.471    | -2.992   | -1.72    | H           | 3.562    | -4.003   | -1.652   |
| C              | 3.572    | -2.295   | -0.353   | H           | 5.89     | -3.691   | -2.439   |
| C              | 6.253    | -1.938   | -1.258   | H           | 2.547    | -2.44    | -0.022   |
| C              | 4.335    | -1.216   | 0.135    | H           | 7.275    | -1.8     | -1.599   |
| C              | 5.674    | -1.061   | -0.332   | H           | -1.736   | 3.357    | -0.665   |
| C              | -0.98    | 2.587    | -0.801   | H           | 5.486    | 1.449    | 1.746    |
| C              | 5.252    | 0.579    | 1.146    | H           | -5.323   | 2.787    | -1.892   |
| C              | 4.087    | -0.151   | 1.08     | H           | -4.901   | 2.781    | -0.09    |
| C              | 0.293    | 2.886    | -1.102   | H           | -5.074   | -1.836   | -1.589   |
| C              | -0.716   | -0.971   | 0.57     | H           | -3.582   | 1.137    | -2.336   |
| C              | -0.425   | 1.19     | 1.782    | H           | -7.103   | -1.51    | 0.683    |
| C              | -4.702   | 2.399    | -1.089   | H           | -1.19    | 0.611    | -1.57    |
| C              | -5.476   | -1.552   | -0.619   | H           | 0.83     | 1.112    | -2.126   |
| C              | -3.746   | 1.496    | -1.318   | H           | -2.381   | -0.803   | 1.887    |
| C              | -6.756   | -1.815   | -0.305   | H           | -3.071   | 1.365    | 0.706    |
| C              | -4.566   | -0.878   | 0.33     | H           | -2.944   | -1.116   | -1.087   |
| C              | -1.365   | 1.14     | -0.618   | H           | 1.557    | -0.237   | -0.386   |
| C              | 1.231    | 1.694    | -1.281   | H           | 2.501    | 2.083    | 0.999    |

|   |        |        |        |   |        |        |        |
|---|--------|--------|--------|---|--------|--------|--------|
| C | -2.167 | -1.272 | 0.917  | H | -0.037 | 5.014  | -1.121 |
| C | -2.85  | 0.899  | -0.258 | H | 1.587  | 4.545  | -0.583 |
| C | -3.118 | -0.628 | -0.12  | H | 1.177  | 4.466  | -2.292 |
| C | 1.135  | 0.716  | -0.063 | H | -7.318 | -2.764 | -2.161 |
| C | 1.899  | 1.194  | 1.211  | H | -8.136 | -3.4   | -0.711 |
| C | -0.34  | 0.494  | 0.393  | H | -8.615 | -1.841 | -1.363 |
| C | 0.777  | 4.3    | -1.283 | H | 3.266  | 1.117  | -1.775 |
| C | -7.748 | -2.492 | -1.192 | H | 2.704  | 2.565  | -2.622 |
| C | 2.677  | 2.034  | -1.665 | H | 3.181  | 2.665  | -0.926 |
| C | 2.826  | 0.128  | 1.852  | H | 2.25   | -0.794 | 1.99   |
| N | 0.823  | 1.563  | 2.124  | H | 3.088  | 0.486  | 2.857  |
| N | 6.2    | 0.044  | 0.299  | H | 0.995  | 1.995  | 3.024  |
| O | 0.065  | -1.903 | 0.428  | H | 7.141  | 0.392  | 0.188  |
| O | -1.438 | 1.365  | 2.456  | H | -1.506 | -3.067 | 0.777  |
| O | -4.921 | -0.509 | 1.447  |   |        |        |        |

**Table S14.** Optimized the coordinates of enantiomer of compound **6** at B3LYP/6-31G(d) level in methanol

| Conformation 1 |        |        |        |      |        |        |        |
|----------------|--------|--------|--------|------|--------|--------|--------|
| Atom           | X      | Y      | Z      | Atom | X      | Y      | Z      |
| C              | 7.043  | 0.86   | 0.057  | O    | -3.173 | -2.396 | 1.512  |
| C              | 7.778  | -0.038 | -0.746 | H    | 7.494  | 1.806  | 0.346  |
| C              | 5.755  | 0.554  | 0.482  | H    | 8.783  | 0.229  | -1.063 |
| C              | 7.242  | -1.261 | -1.136 | H    | 5.202  | 1.254  | 1.104  |
| C              | 5.181  | -0.674 | 0.102  | H    | 7.808  | -1.956 | -1.751 |
| C              | 5.945  | -1.566 | -0.705 | H    | -1.362 | 2.8    | -1.548 |
| C              | -0.954 | 2.433  | -0.61  | H    | 3.211  | -3.311 | -0.328 |
| C              | 3.956  | -2.527 | -0.284 | H    | -5.132 | 3.095  | -2.073 |
| C              | 3.911  | -1.312 | 0.36   | H    | -4.158 | 1.75   | -2.892 |
| C              | 0.165  | 2.944  | -0.072 | H    | -6.192 | -0.179 | 1.144  |
| C              | -1.309 | -0.897 | 1.225  | H    | -4.217 | 2.472  | 0.102  |
| C              | -0.044 | -0.451 | -0.88  | H    | -7.143 | -1.795 | -1.279 |
| C              | -4.427 | 2.273  | -1.976 | H    | -1.971 | 1.685  | 1.1    |
| C              | -6.141 | -0.739 | 0.213  | H    | -0.207 | 2.53   | 1.977  |
| C              | -3.919 | 1.922  | -0.793 | H    | -2.338 | -1.932 | -0.325 |
| C              | -7.254 | -1.242 | -0.346 | H    | -2.691 | 0.339  | -1.536 |
| C              | -4.81  | -0.927 | -0.402 | H    | -3.912 | 0.128  | 1.265  |
| C              | -1.659 | 1.312  | 0.11   | H    | 0.702  | 0.368  | 2.156  |
| C              | 0.603  | 2.33   | 1.257  | H    | 2.526  | 1.079  | 0.014  |
| C              | -2.595 | -1.454 | 0.631  | H    | 0.988  | 4.947  | -0.062 |
| C              | -2.946 | 0.788  | -0.573 | H    | 0.475  | 4.366  | -1.657 |
| C              | -3.595 | -0.315 | 0.313  | H    | 1.978  | 3.776  | -0.923 |
| C              | 0.657  | 0.774  | 1.141  | H    | -9.075 | -2.101 | 0.38   |

|                |          |          |          |             |          |          |          |
|----------------|----------|----------|----------|-------------|----------|----------|----------|
| C              | 1.89     | 0.25     | 0.342    | H           | -8.659   | -0.543   | 1.137    |
| C              | -0.598   | 0.189    | 0.426    | H           | -9.292   | -0.613   | -0.526   |
| C              | 0.939    | 4.064    | -0.713   | H           | 2.754    | 2.827    | 1.241    |
| C              | -8.637   | -1.11    | 0.202    | H           | 2.096    | 2.418    | 2.833    |
| C              | 1.873    | 2.921    | 1.885    | H           | 1.738    | 3.986    | 2.1      |
| C              | 2.757    | -0.75    | 1.141    | H           | 2.107    | -1.56    | 1.494    |
| N              | 1.299    | -0.367   | -0.836   | H           | 3.124    | -0.228   | 2.035    |
| N              | 5.169    | -2.684   | -0.922   | H           | 1.864    | -0.778   | -1.569   |
| O              | -0.921   | -1.314   | 2.307    | H           | 5.446    | -3.497   | -1.452   |
| O              | -0.702   | -0.959   | -1.786   | H           | -2.575   | -2.422   | 2.286    |
| O              | -4.642   | -1.544   | -1.451   |             |          |          |          |
| Conformation 2 |          |          |          |             |          |          |          |
| <b>Atom</b>    | <b>X</b> | <b>Y</b> | <b>Z</b> | <b>Atom</b> | <b>X</b> | <b>Y</b> | <b>Z</b> |
| C              | 6.899    | 0.606    | -0.507   | O           | -3.2     | -1.688   | 2.432    |
| C              | 7.531    | -0.507   | -1.101   | H           | 7.405    | 1.568    | -0.508   |
| C              | 5.643    | 0.491    | 0.077    | H           | 8.513    | -0.387   | -1.551   |
| C              | 6.922    | -1.757   | -1.119   | H           | 5.17     | 1.357    | 0.534    |
| C              | 4.997    | -0.759   | 0.073    | H           | 7.408    | -2.616   | -1.573   |
| C              | 5.657    | -1.869   | -0.528   | H           | -1.549   | 2.576    | -1.902   |
| C              | -1.07    | 2.426    | -0.937   | H           | 2.907    | -3.305   | 0.489    |
| C              | 3.679    | -2.579   | 0.273    | H           | -5.337   | 2.892    | -2.195   |
| C              | 3.732    | -1.239   | 0.581    | H           | -4.422   | 1.39     | -2.77    |
| C              | 0.103    | 3        | -0.63    | H           | -3.996   | -1.812   | -1.184   |
| C              | -1.351   | -0.336   | 1.681    | H           | -4.302   | 2.717    | 0.008    |
| C              | -0.252   | -0.474   | -0.561   | H           | -6.992   | -2.024   | -0.595   |
| C              | -4.633   | 2.096    | -1.969   | H           | -1.972   | 2.15     | 0.972    |
| C              | -4.952   | -1.614   | -0.705   | H           | -0.098   | 3.114    | 1.479    |
| C              | -4.059   | 1.989    | -0.769   | H           | -2.45    | -1.714   | 0.51     |
| C              | -6.059   | -2.259   | -1.108   | H           | -2.889   | 0.266    | -1.233   |
| C              | -4.994   | -0.619   | 0.393    | H           | -3.92    | 0.718    | 1.629    |
| C              | -1.74    | 1.54     | 0.082    | H           | 0.757    | 1.028    | 2.12     |
| C              | 0.64     | 2.707    | 0.77     | H           | 2.44     | 1.092    | -0.235   |
| C              | -2.67    | -1.004   | 1.317    | H           | 0.976    | 4.906    | -1.17    |
| C              | -3.081   | 0.91     | -0.371   | H           | 0.308    | 3.988    | -2.531   |
| C              | -3.675   | 0.056    | 0.79     | H           | 1.853    | 3.518    | -1.8     |
| C              | 0.644    | 1.169    | 1.042    | H           | -6.827   | -2.949   | -2.983   |
| C              | 1.792    | 0.403    | 0.316    | H           | -5.148   | -3.448   | -2.663   |
| C              | -0.679   | 0.484    | 0.587    | H           | -6.509   | -4.227   | -1.821   |
| C              | 0.846    | 3.897    | -1.583   | H           | 2.796    | 3.079    | 0.471    |
| C              | -6.125   | -3.272   | -2.203   | H           | 2.262    | 3.112    | 2.158    |
| C              | 1.975    | 3.373    | 1.133    | H           | 1.889    | 4.463    | 1.083    |
| C              | 2.669    | -0.435   | 1.276    | H           | 2.011    | -1.097   | 1.851    |
| N              | 1.09     | -0.436   | -0.645   | H           | 3.127    | 0.258    | 1.994    |

|                |          |          |          |             |          |          |          |
|----------------|----------|----------|----------|-------------|----------|----------|----------|
| N              | 4.827    | -2.961   | -0.39    | H           | 1.582    | -1.043   | -1.29    |
| O              | -0.917   | -0.449   | 2.818    | H           | 5.03     | -3.898   | -0.707   |
| O              | -0.996   | -1.159   | -1.263   | H           | -2.586   | -1.493   | 3.169    |
| O              | -6.033   | -0.323   | 0.975    |             |          |          |          |
| Conformation 3 |          |          |          |             |          |          |          |
| <b>Atom</b>    | <b>X</b> | <b>Y</b> | <b>Z</b> | <b>Atom</b> | <b>X</b> | <b>Y</b> | <b>Z</b> |
| C              | 4.368    | -3.493   | -0.75    | O           | -2.542   | -2.12    | 1.984    |
| C              | 5.698    | -3.439   | -1.22    | H           | 3.788    | -4.401   | -0.897   |
| C              | 3.789    | -2.407   | -0.103   | H           | 6.122    | -4.304   | -1.723   |
| C              | 6.476    | -2.299   | -1.048   | H           | 2.764    | -2.463   | 0.254    |
| C              | 4.548    | -1.235   | 0.084    | H           | 7.501    | -2.256   | -1.406   |
| C              | 5.891    | -1.208   | -0.396   | H           | -1.57    | 2.65     | -2.014   |
| C              | -1.143   | 2.547    | -1.02    | H           | 5.68     | 1.772    | 0.921    |
| C              | 5.454    | 0.77     | 0.58     | H           | -5.297   | 2.125    | -2.628   |
| C              | 4.291    | 0.045    | 0.705    | H           | -4.056   | 0.858    | -3.16    |
| C              | -0.159   | 3.348    | -0.581   | H           | -5.904   | -0.571   | 1.137    |
| C              | -0.972   | -0.383   | 1.423    | H           | -4.391   | 2.105    | -0.363   |
| C              | 0.281    | -0.118   | -0.722   | H           | -6.44    | -2.797   | -0.898   |
| C              | -4.459   | 1.483    | -2.366   | H           | -2.082   | 1.957    | 0.794    |
| C              | -5.71    | -1.294   | 0.348    | H           | -0.537   | 3.263    | 1.506    |
| C              | -3.955   | 1.462    | -1.13    | H           | -1.727   | -1.869   | 0.099    |
| C              | -6.692   | -2.09    | -0.108   | H           | -2.426   | 0.024    | -1.535   |
| C              | -4.336   | -1.369   | -0.191   | H           | -3.712   | 0.131    | 1.244    |
| C              | -1.665   | 1.469    | -0.104   | H           | 0.74     | 1.38     | 2.102    |
| C              | 0.325    | 3.086    | 0.844    | H           | 2.492    | 2.004    | -0.129   |
| C              | -2.107   | -1.273   | 0.94     | H           | -0.042   | 4.483    | -2.407   |
| C              | -2.803   | 0.594    | -0.682   | H           | 0.29     | 5.434    | -0.948   |
| C              | -3.281   | -0.42    | 0.399    | H           | 1.509    | 4.325    | -1.562   |
| C              | 0.665    | 1.573    | 1.028    | H           | -8.27    | -1.355   | 1.168    |
| C              | 2.005    | 1.149    | 0.352    | H           | -8.794   | -1.879   | -0.452   |
| C              | -0.433   | 0.642    | 0.432    | H           | -8.379   | -3.084   | 0.756    |
| C              | 0.428    | 4.452    | -1.419   | H           | 1.697    | 3.748    | 2.392    |
| C              | -8.104   | -2.091   | 0.376    | H           | 1.113    | 5.052    | 1.352    |
| C              | 1.44     | 4.007    | 1.359    | H           | 2.357    | 3.947    | 0.762    |
| C              | 3.012    | 0.517    | 1.34     | H           | 2.511    | -0.311   | 1.859    |
| N              | 1.585    | 0.218    | -0.687   | H           | 3.236    | 1.275    | 2.101    |
| N              | 6.411    | 0.028    | -0.081   | H           | 2.239    | -0.205   | -1.334   |
| O              | -0.567   | -0.5     | 2.572    | H           | 7.351    | 0.338    | -0.278   |
| O              | -0.237   | -0.9     | -1.517   | H           | -1.992   | -1.877   | 2.756    |
| O              | -4.012   | -2.15    | -1.082   |             |          |          |          |
| Conformation 4 |          |          |          |             |          |          |          |
| <b>Atom</b>    | <b>X</b> | <b>Y</b> | <b>Z</b> | <b>Atom</b> | <b>X</b> | <b>Y</b> | <b>Z</b> |
| C              | 4.209    | -3.603   | -0.095   | O           | -2.816   | -1.331   | 2.742    |

|                |          |          |          |             |          |          |          |
|----------------|----------|----------|----------|-------------|----------|----------|----------|
| C              | 5.463    | -3.659   | -0.741   | H           | 3.646    | -4.521   | 0.054    |
| C              | 3.683    | -2.396   | 0.352    | H           | 5.847    | -4.617   | -1.08    |
| C              | 6.217    | -2.509   | -0.948   | H           | 2.717    | -2.37    | 0.849    |
| C              | 4.419    | -1.211   | 0.154    | H           | 7.184    | -2.549   | -1.441   |
| C              | 5.685    | -1.295   | -0.495   | H           | -1.683   | 2.396    | -2.229   |
| C              | -1.226   | 2.456    | -1.244   | H           | 5.545    | 1.911    | 0.099    |
| C              | 5.311    | 0.857    | 0.037    | H           | -5.421   | 1.928    | -2.696   |
| C              | 4.201    | 0.179    | 0.486    | H           | -4.235   | 0.536    | -2.984   |
| C              | -0.195   | 3.276    | -0.987   | H           | -3.338   | -2.257   | -0.825   |
| C              | -1.165   | 0.133    | 1.773    | H           | -4.496   | 2.296    | -0.468   |
| C              | 0.019    | -0.241   | -0.407   | H           | -6.288   | -2.901   | -0.319   |
| C              | -4.606   | 1.315    | -2.32    | H           | -2.148   | 2.282    | 0.661    |
| C              | -4.345   | -2.155   | -0.427   | H           | -0.49    | 3.594    | 1.095    |
| C              | -4.091   | 1.506    | -1.104   | H           | -1.971   | -1.609   | 0.881    |
| C              | -5.295   | -3.05    | -0.744   | H           | -2.63    | -0.043   | -1.238   |
| C              | -4.631   | -1.005   | 0.465    | H           | -3.882   | 0.697    | 1.471    |
| C              | -1.777   | 1.605    | -0.128   | H           | 0.774    | 1.771    | 1.958    |
| C              | 0.332    | 3.253    | 0.446    | H           | 2.274    | 1.873    | -0.562   |
| C              | -2.342   | -0.8     | 1.523    | H           | 0.323    | 5.235    | -1.748   |
| C              | -2.969   | 0.692    | -0.504   | H           | -0.093   | 4.046    | -2.995   |
| C              | -3.475   | -0.045   | 0.773    | H           | 1.478    | 3.98     | -2.175   |
| C              | 0.61     | 1.78     | 0.876    | H           | -5.802   | -4.19    | -2.484   |
| C              | 1.863    | 1.172    | 0.172    | H           | -4.088   | -4.309   | -2.016   |
| C              | -0.578   | 0.828    | 0.55     | H           | -5.35    | -5.161   | -1.092   |
| C              | 0.408    | 4.178    | -2.031   | H           | 2.404    | 3.948    | 0.145    |
| C              | -5.11    | -4.236   | -1.632   | H           | 1.797    | 4.11     | 1.8      |
| C              | 1.517    | 4.182    | 0.743    | H           | 1.252    | 5.225    | 0.543    |
| C              | 2.997    | 0.787    | 1.15     | H           | 2.585    | 0.103    | 1.904    |
| N              | 1.332    | 0.019    | -0.542   | H           | 3.291    | 1.7      | 1.682    |
| N              | 6.199    | -0.018   | -0.552   | H           | 1.916    | -0.581   | -1.112   |
| O              | -0.785   | 0.325    | 2.919    | H           | 7.095    | 0.238    | -0.941   |
| O              | -0.584   | -1.173   | -0.94    | H           | -2.29    | -0.887   | 3.437    |
| O              | -5.742   | -0.802   | 0.944    |             |          |          |          |
| Conformation 5 |          |          |          |             |          |          |          |
| <b>Atom</b>    | <b>X</b> | <b>Y</b> | <b>Z</b> | <b>Atom</b> | <b>X</b> | <b>Y</b> | <b>Z</b> |
| C              | -6.949   | 0.603    | 0.783    | O           | 2.975    | -2.803   | 0.208    |
| C              | -7.635   | 0.034    | -0.312   | H           | -7.45    | 1.348    | 1.395    |
| C              | -5.646   | 0.224    | 1.088    | H           | -8.653   | 0.35     | -0.527   |
| C              | -7.034   | -0.925   | -1.12    | H           | -5.131   | 0.668    | 1.937    |
| C              | -5.008   | -0.742   | 0.288    | H           | -7.562   | -1.365   | -1.962   |
| C              | -5.722   | -1.303   | -0.809   | H           | 1.508    | 3.304    | 0.11     |
| C              | 0.889    | 2.504    | -0.288   | H           | -2.895   | -2.918   | -1.059   |
| C              | -3.683   | -2.25    | -0.74    | H           | 5.2      | 3.574    | -0.878   |

|                |          |          |          |             |          |          |          |
|----------------|----------|----------|----------|-------------|----------|----------|----------|
| C              | -3.704   | -1.363   | 0.312    | H           | 4.678    | 3.035    | 0.814    |
| C              | -0.398   | 2.698    | -0.618   | H           | 5.647    | -1.075   | -1.764   |
| C              | 1.104    | -1.293   | 0.083    | H           | 3.772    | 1.875    | -1.892   |
| C              | 0.42     | 0.407    | 1.785    | H           | 7.47     | -1.016   | 0.697    |
| C              | 4.602    | 2.906    | -0.264   | H           | 1.444    | 0.854    | -1.518   |
| C              | 5.947    | -0.964   | -0.724   | H           | -0.597   | 1.208    | -2.109   |
| C              | 3.817    | 1.973    | -0.805   | H           | 2.642    | -1.269   | 1.556    |
| C              | 7.228    | -1.139   | -0.358   | H           | 3.055    | 1.218    | 1.044    |
| C              | 4.897    | -0.624   | 0.26     | H           | 3.422    | -0.687   | -1.327   |
| C              | 1.483    | 1.127    | -0.449   | H           | -1.203   | -0.645   | -0.848   |
| C              | -1.129   | 1.482    | -1.183   | H           | -2.573   | 1.054    | 0.99     |
| C              | 2.56     | -1.48    | 0.481    | H           | -1.453   | 4.402    | -1.438   |
| C              | 2.965    | 1        | -0.024   | H           | -0.4     | 4.778    | -0.061   |
| C              | 3.459    | -0.457   | -0.255   | H           | -1.957   | 3.967    | 0.19     |
| C              | -0.948   | 0.236    | -0.254   | H           | 8.825    | -2.429   | -0.96    |
| C              | -1.84    | 0.244    | 1.023    | H           | 8.024    | -1.592   | -2.313   |
| C              | 0.517    | 0.102    | 0.262    | H           | 9.139    | -0.722   | -1.229   |
| C              | -1.085   | 4.029    | -0.473   | H           | -3.225   | 2.043    | -0.773   |
| C              | 8.354    | -1.489   | -1.275   | H           | -3.018   | 0.786    | -1.996   |
| C              | -2.589   | 1.712    | -1.599   | H           | -2.648   | 2.472    | -2.385   |
| C              | -2.587   | -1.092   | 1.278    | H           | -2.98    | -1.064   | 2.304    |
| N              | -0.887   | 0.515    | 2.093    | H           | -1.855   | -1.907   | 1.243    |
| N              | -4.886   | -2.216   | -1.416   | H           | -1.17    | 0.66     | 3.055    |
| O              | 0.485    | -2.242   | -0.38    | H           | -5.12    | -2.788   | -2.214   |
| O              | 1.357    | 0.526    | 2.572    | H           | 2.195    | -3.239   | -0.19    |
| O              | 5.129    | -0.475   | 1.457    |             |          |          |          |
| Conformation 6 |          |          |          |             |          |          |          |
| <b>Atom</b>    | <b>X</b> | <b>Y</b> | <b>Z</b> | <b>Atom</b> | <b>X</b> | <b>Y</b> | <b>Z</b> |
| C              | -6.73    | 0.545    | 1.475    | O           | 2.952    | -2.831   | -0.955   |
| C              | -7.567   | 0.193    | 0.394    | H           | -7.123   | 1.178    | 2.267    |
| C              | -5.416   | 0.095    | 1.541    | H           | -8.59    | 0.56     | 0.369    |
| C              | -7.108   | -0.618   | -0.639   | H           | -4.784   | 0.371    | 2.381    |
| C              | -4.919   | -0.724   | 0.51     | H           | -7.752   | -0.892   | -1.47    |
| C              | -5.785   | -1.069   | -0.568   | H           | 1.632    | 3.199    | 0.246    |
| C              | 0.954    | 2.484    | -0.213   | H           | -3.078   | -2.668   | -1.451   |
| C              | -3.793   | -2.051   | -0.924   | H           | 5.182    | 3.648    | -1.073   |
| C              | -3.649   | -1.364   | 0.259    | H           | 4.803    | 2.85     | 0.553    |
| C              | -0.356   | 2.738    | -0.359   | H           | 4.685    | -0.63    | 1.459    |
| C              | 1.118    | -1.311   | -0.591   | H           | 3.666    | 2.111    | -2.213   |
| C              | 0.693    | 0.022    | 1.487    | H           | 7.389    | -1.164   | 0.129    |
| C              | 4.635    | 2.888    | -0.521   | H           | 1.342    | 1.08     | -1.771   |
| C              | 5.412    | -0.78    | 0.664    | H           | -0.752   | 1.529    | -2.051   |
| C              | 3.803    | 2.042    | -1.132   | H           | 2.76     | -1.625   | 0.708    |



|                |          |          |          |             |          |          |          |
|----------------|----------|----------|----------|-------------|----------|----------|----------|
| C              | 6.7      | -1.021   | 0.961    | H           | 3.205    | 1.004    | 0.635    |
| C              | 4.942    | -0.708   | -0.74    | H           | 3.314    | -0.465   | -2.064   |
| C              | 1.498    | 1.158    | -0.681   | H           | -1.27    | -0.51    | -1.057   |
| C              | -1.173   | 1.642    | -1.039   | H           | -2.341   | 0.872    | 1.206    |
| C              | 2.599    | -1.593   | -0.378   | H           | -1.45    | 4.565    | -0.75    |
| C              | 3.014    | 0.955    | -0.441   | H           | -0.249   | 4.687    | 0.549    |
| C              | 3.451    | -0.441   | -0.977   | H           | -1.79    | 3.853    | 0.822    |
| C              | -0.918   | 0.255    | -0.361   | H           | 8.069    | -0.365   | 2.471    |
| C              | -1.646   | 0.053    | 1.002    | H           | 6.514    | -0.954   | 3.111    |
| C              | 0.593    | 0.018    | -0.065   | H           | 7.741    | -2.09    | 2.496    |
| C              | -0.991   | 4.026    | 0.09     | H           | -3.198   | 2.125    | -0.305   |
| C              | 7.273    | -1.109   | 2.338    | H           | -3.154   | 1.108    | -1.748   |
| C              | -2.663   | 1.946    | -1.243   | H           | -2.79    | 2.835    | -1.869   |
| C              | -2.414   | -1.291   | 1.11     | H           | -2.68    | -1.44    | 2.166    |
| N              | -0.559   | 0.104    | 1.973    | H           | -1.726   | -2.101   | 0.842    |
| N              | -5.067   | -1.876   | -1.425   | H           | -0.719   | 0.064    | 2.973    |
| O              | 0.436    | -2.129   | -1.193   | H           | -5.419   | -2.292   | -2.274   |
| O              | 1.723    | -0.04    | 2.158    | H           | 2.135    | -3.157   | -1.384   |
| O              | 5.699    | -0.848   | -1.696   |             |          |          |          |
| Conformation 7 |          |          |          |             |          |          |          |
| <b>Atom</b>    | <b>X</b> | <b>Y</b> | <b>Z</b> | <b>Atom</b> | <b>X</b> | <b>Y</b> | <b>Z</b> |
| C              | -4.145   | -3.168   | -1.271   | O           | 2.373    | -2.667   | 0.991    |
| C              | -5.471   | -2.992   | -1.72    | H           | -3.562   | -4.003   | -1.652   |
| C              | -3.572   | -2.295   | -0.353   | H           | -5.89    | -3.691   | -2.439   |
| C              | -6.253   | -1.938   | -1.258   | H           | -2.547   | -2.44    | -0.022   |
| C              | -4.335   | -1.216   | 0.135    | H           | -7.275   | -1.8     | -1.599   |
| C              | -5.674   | -1.061   | -0.332   | H           | 1.736    | 3.357    | -0.665   |
| C              | 0.98     | 2.587    | -0.801   | H           | -5.486   | 1.449    | 1.746    |
| C              | -5.252   | 0.579    | 1.146    | H           | 5.323    | 2.787    | -1.892   |
| C              | -4.087   | -0.151   | 1.08     | H           | 4.901    | 2.781    | -0.09    |
| C              | -0.293   | 2.886    | -1.102   | H           | 5.074    | -1.836   | -1.589   |
| C              | 0.716    | -0.971   | 0.57     | H           | 3.582    | 1.137    | -2.336   |
| C              | 0.425    | 1.19     | 1.782    | H           | 7.103    | -1.51    | 0.683    |
| C              | 4.702    | 2.399    | -1.089   | H           | 1.19     | 0.611    | -1.57    |
| C              | 5.476    | -1.552   | -0.619   | H           | -0.83    | 1.112    | -2.126   |
| C              | 3.746    | 1.496    | -1.318   | H           | 2.381    | -0.803   | 1.887    |
| C              | 6.756    | -1.815   | -0.305   | H           | 3.071    | 1.365    | 0.706    |
| C              | 4.566    | -0.878   | 0.33     | H           | 2.944    | -1.116   | -1.087   |
| C              | 1.365    | 1.141    | -0.618   | H           | -1.557   | -0.237   | -0.386   |
| C              | -1.231   | 1.694    | -1.281   | H           | -2.501   | 2.083    | 0.999    |
| C              | 2.167    | -1.272   | 0.917    | H           | -1.177   | 4.466    | -2.292   |
| C              | 2.85     | 0.899    | -0.258   | H           | 0.037    | 5.014    | -1.121   |
| C              | 3.118    | -0.628   | -0.12    | H           | -1.587   | 4.545    | -0.583   |

|   |        |        |        |   |        |        |        |
|---|--------|--------|--------|---|--------|--------|--------|
| C | -1.135 | 0.716  | -0.063 | H | 8.136  | -3.4   | -0.711 |
| C | -1.899 | 1.194  | 1.211  | H | 7.318  | -2.764 | -2.161 |
| C | 0.34   | 0.494  | 0.393  | H | 8.615  | -1.841 | -1.363 |
| C | -0.777 | 4.3    | -1.283 | H | -3.181 | 2.665  | -0.926 |
| C | 7.748  | -2.492 | -1.192 | H | -3.266 | 1.117  | -1.775 |
| C | -2.677 | 2.034  | -1.665 | H | -2.704 | 2.565  | -2.622 |
| C | -2.826 | 0.128  | 1.852  | H | -3.088 | 0.486  | 2.857  |
| N | -0.823 | 1.563  | 2.124  | H | -2.25  | -0.794 | 1.99   |
| N | -6.2   | 0.044  | 0.299  | H | -0.995 | 1.995  | 3.024  |
| O | -0.065 | -1.903 | 0.428  | H | -7.141 | 0.392  | 0.188  |
| O | 1.438  | 1.365  | 2.456  | H | 1.506  | -3.067 | 0.777  |
| O | 4.921  | -0.509 | 1.447  |   |        |        |        |

Fig. S5. <sup>1</sup>H NMR (400 MHz, CDCl<sub>3</sub>) spectrum of **1**.

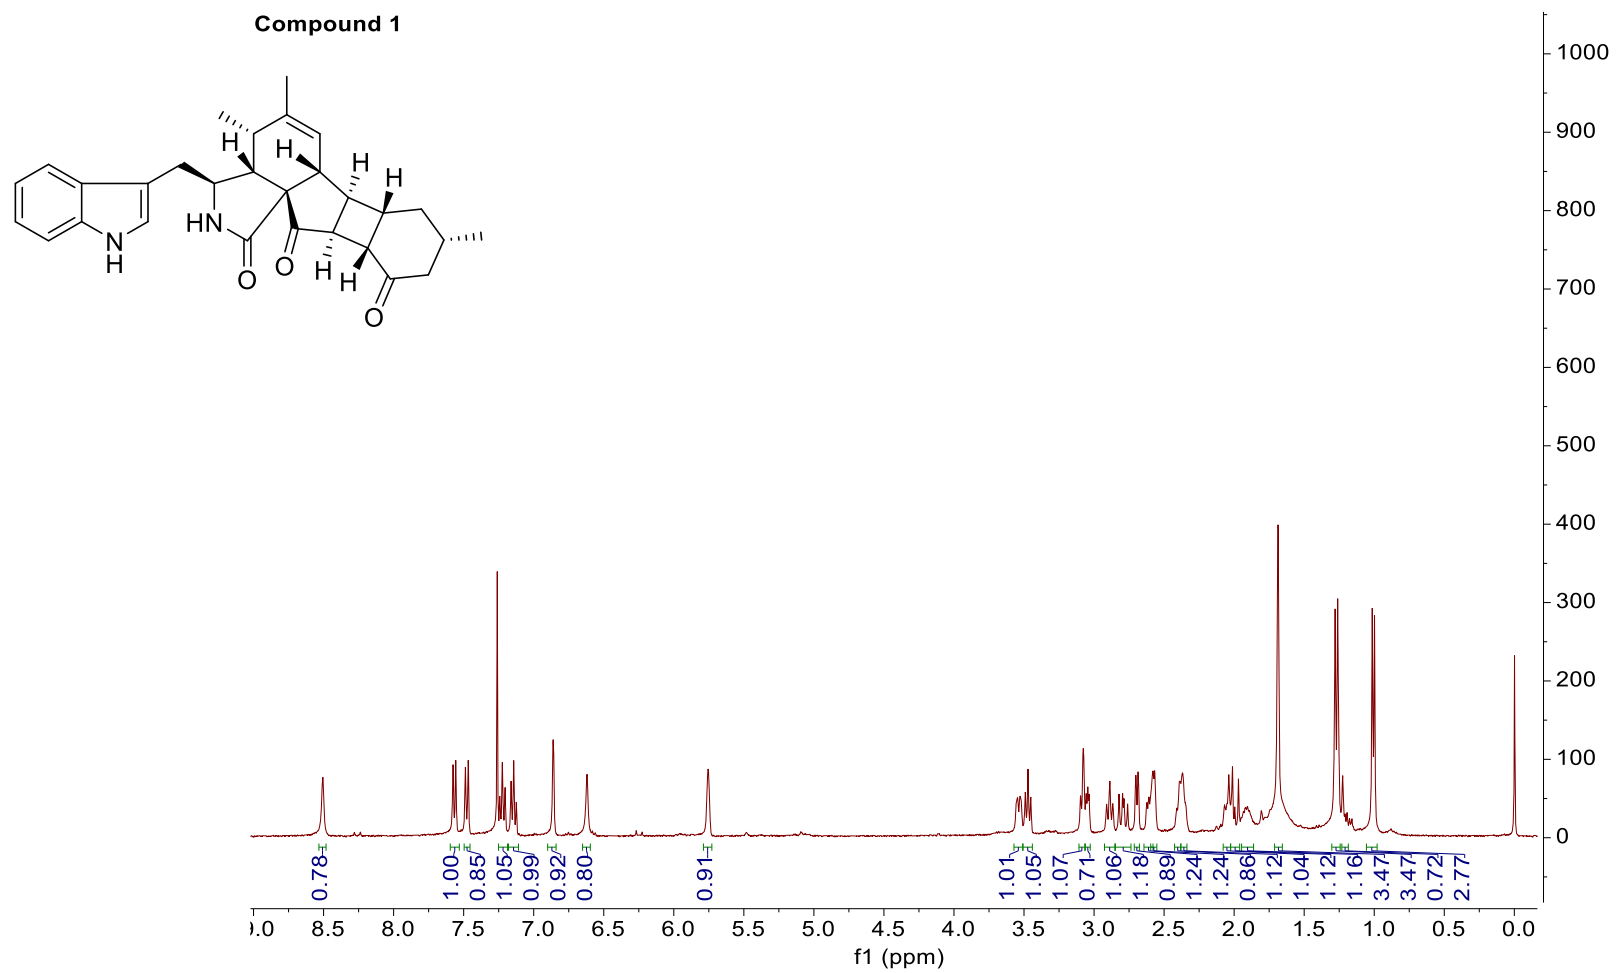

**Fig. S6.** Enlarged  $^1\text{H}$  NMR (400 MHz,  $\text{CDCl}_3$ ) spectrum of **1**.

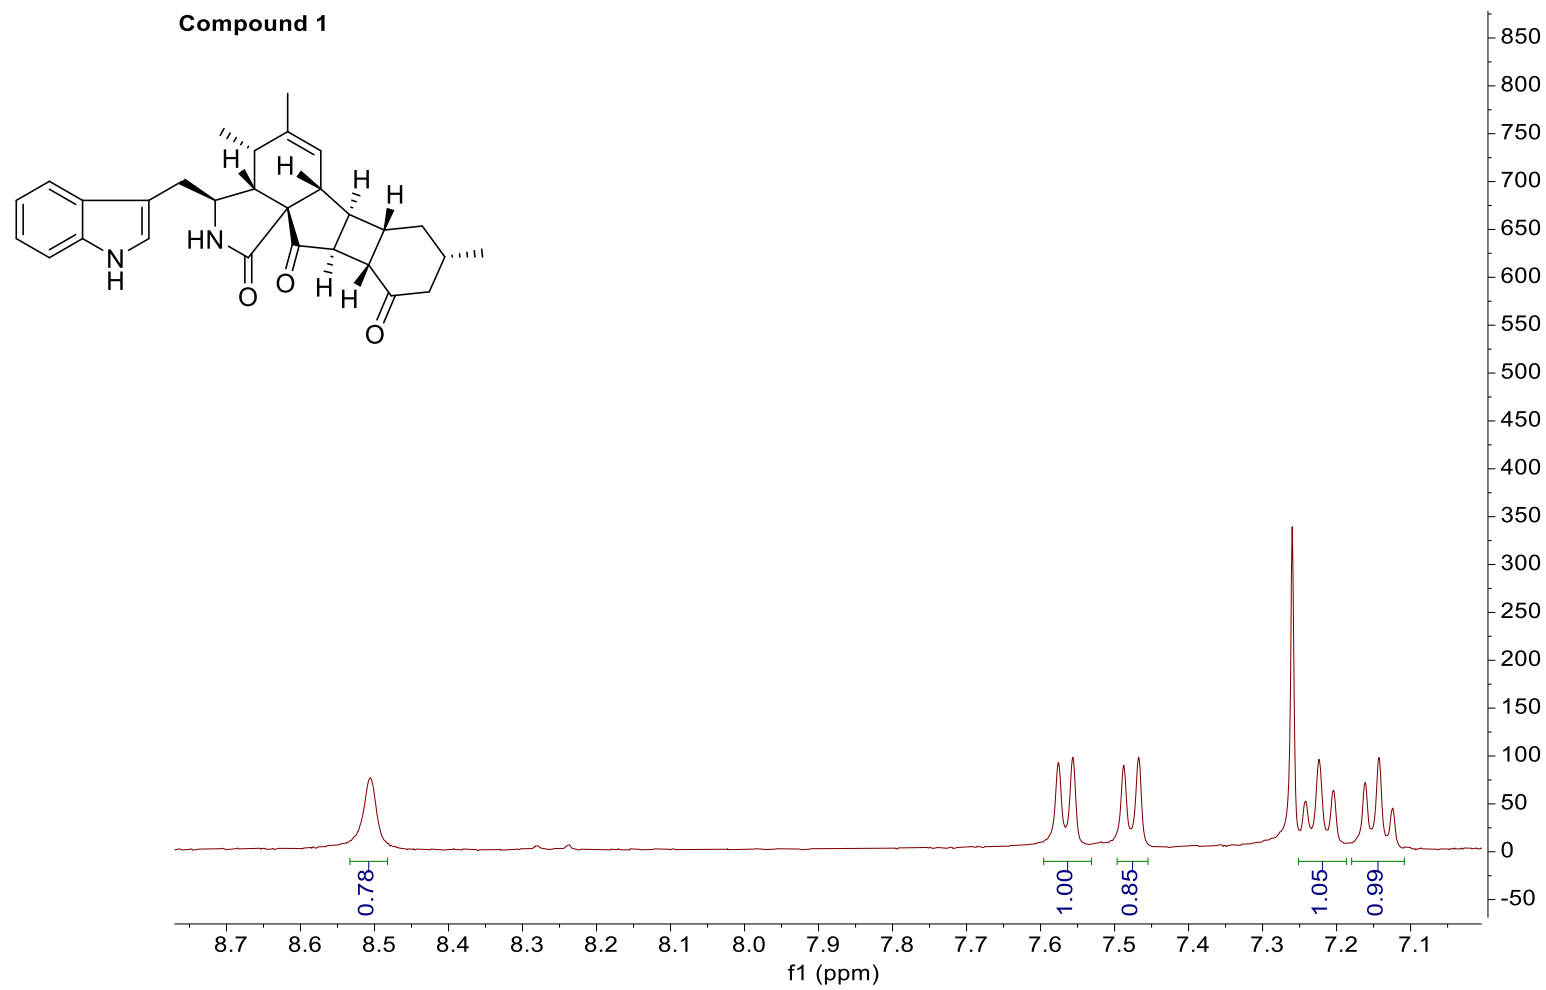

Compound 1

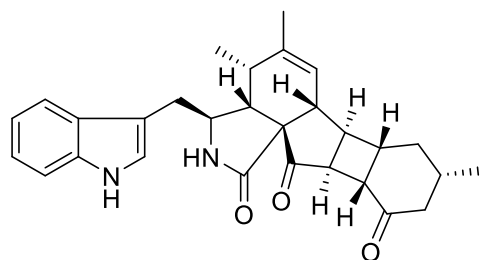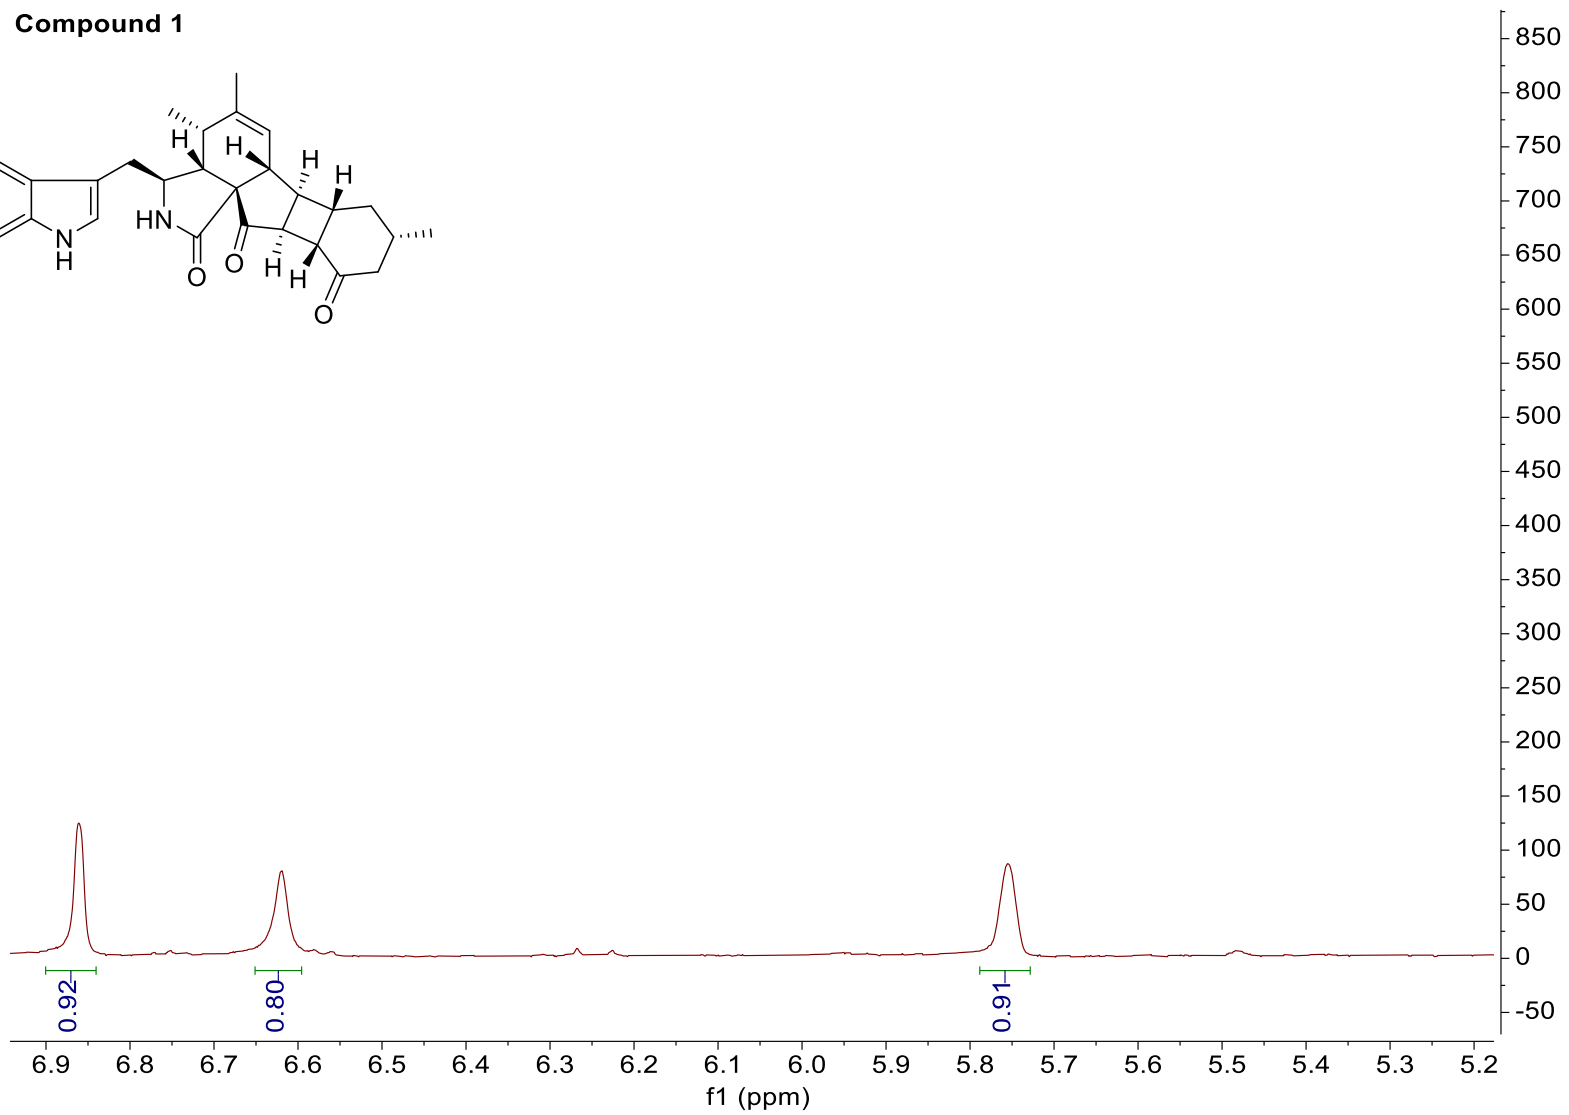

Compound 1

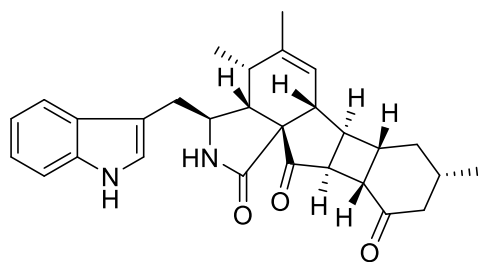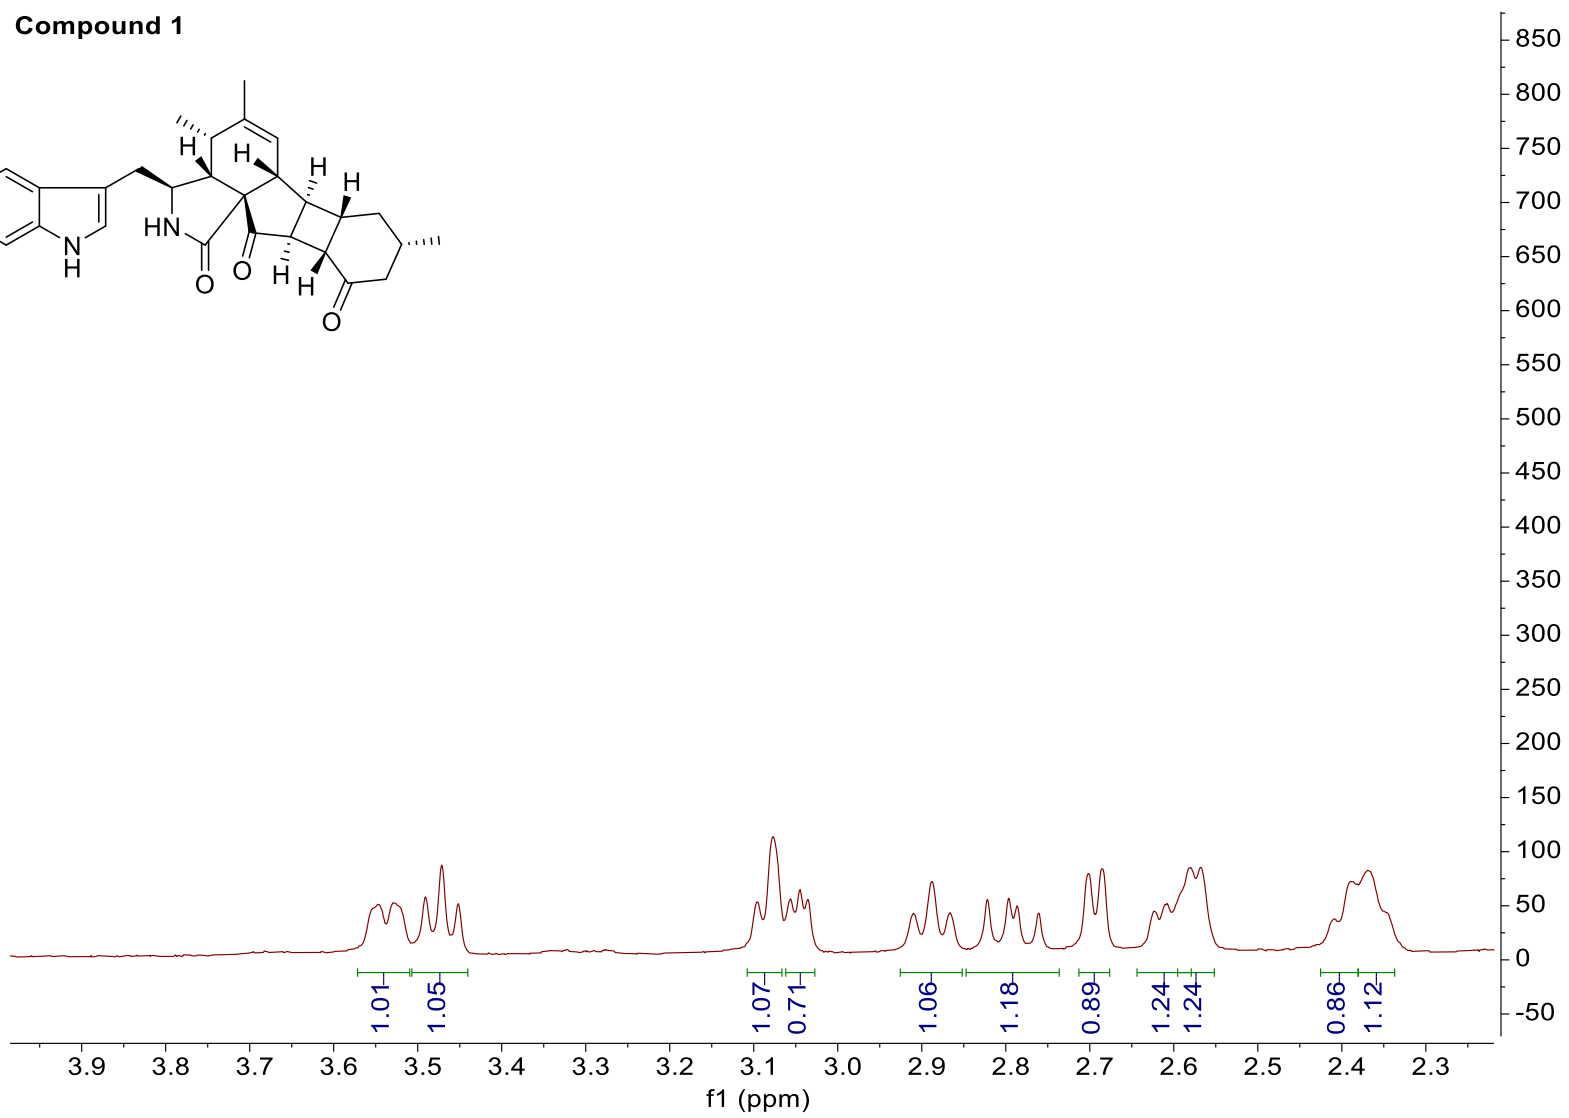

Compound 1

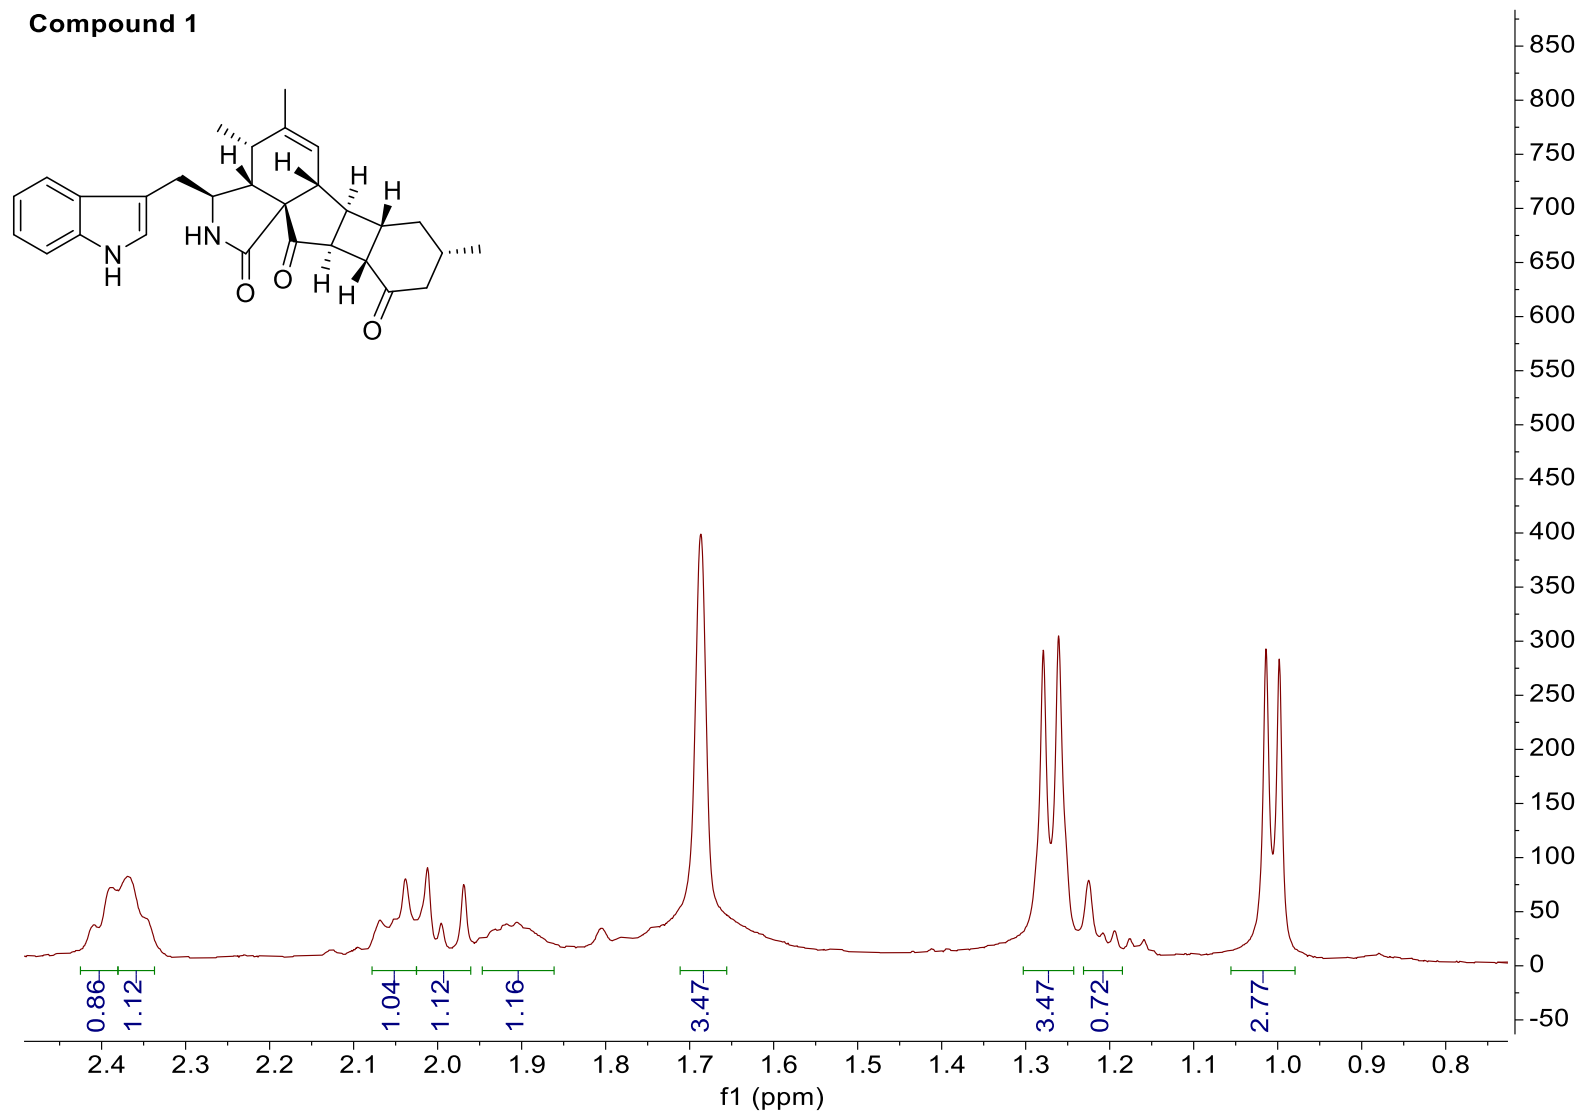

Fig. S7.  $^{13}\text{C}$  NMR (100 MHz,  $\text{CDCl}_3$ ) spectrum of **1**.

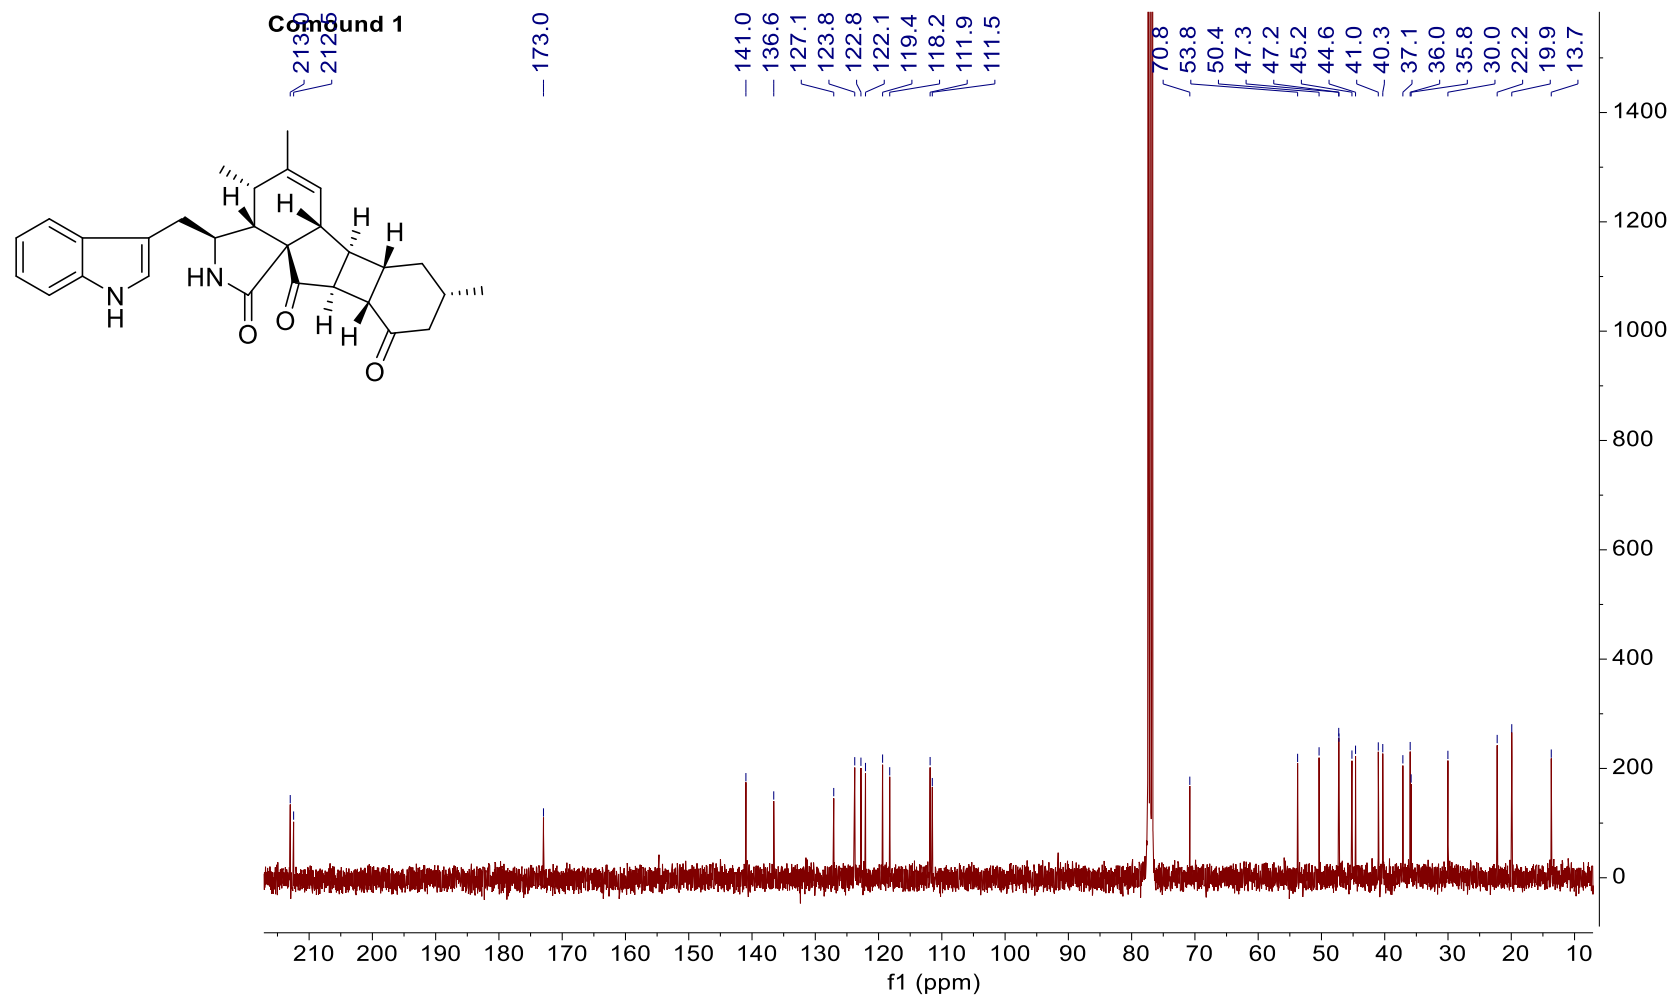



Fig. S8. DEPT-135 (100 MHz, CDCl<sub>3</sub>) spectrum of **1**.

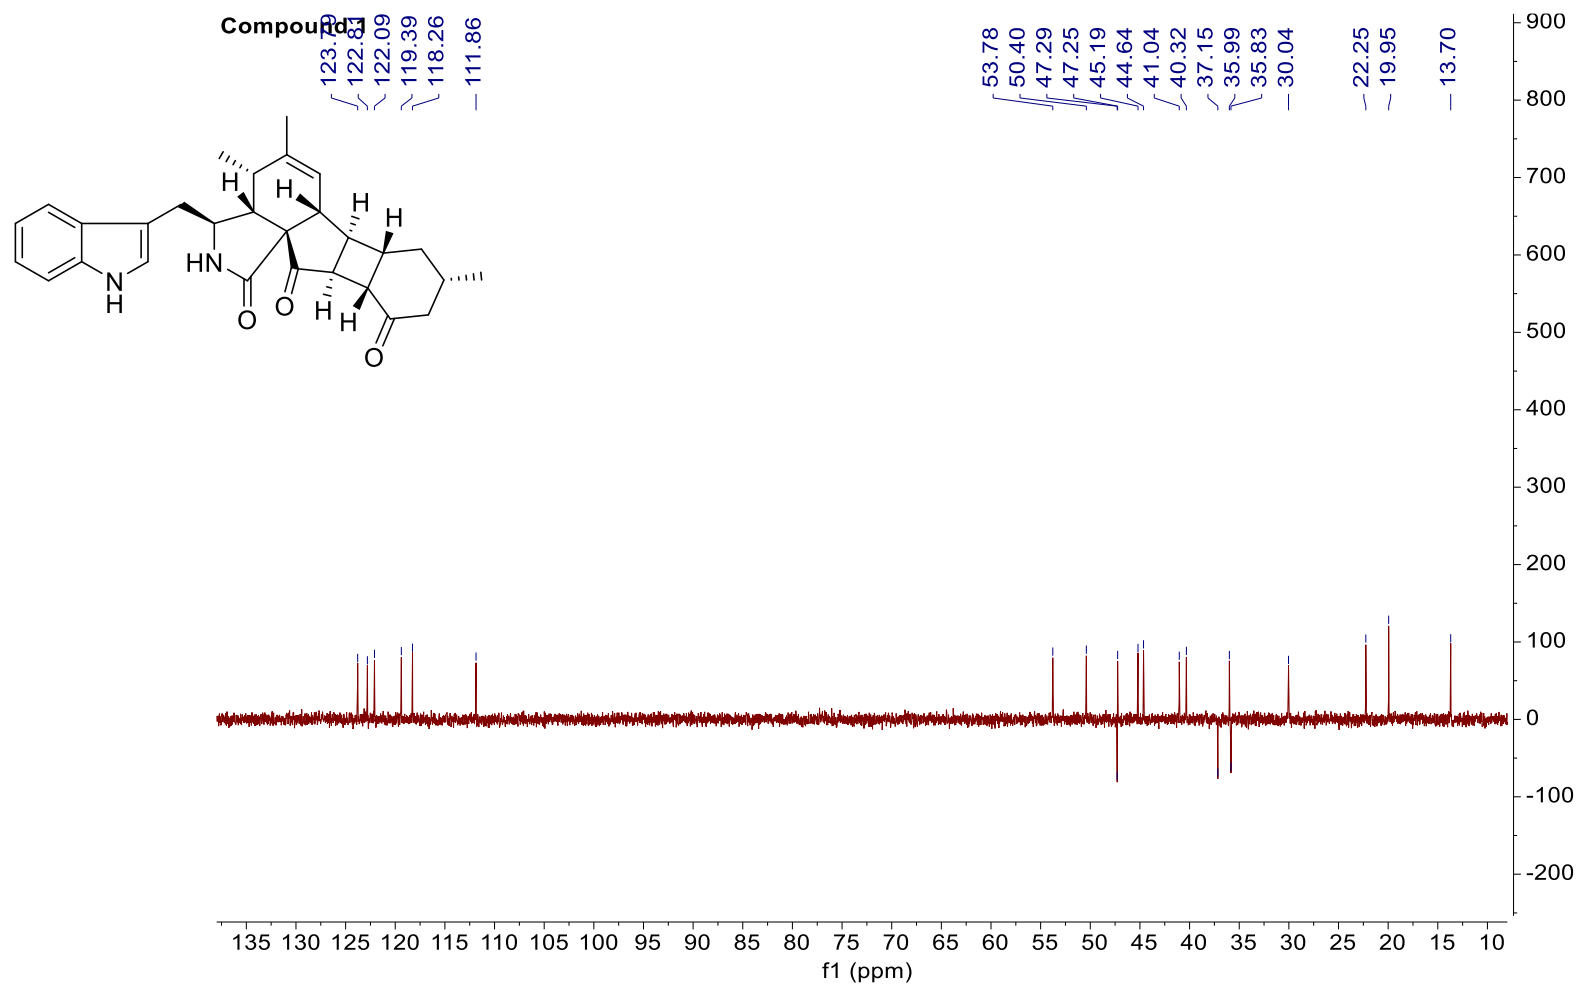

Fig. S9. HSQC spectrum of **1** in CDCl<sub>3</sub>.

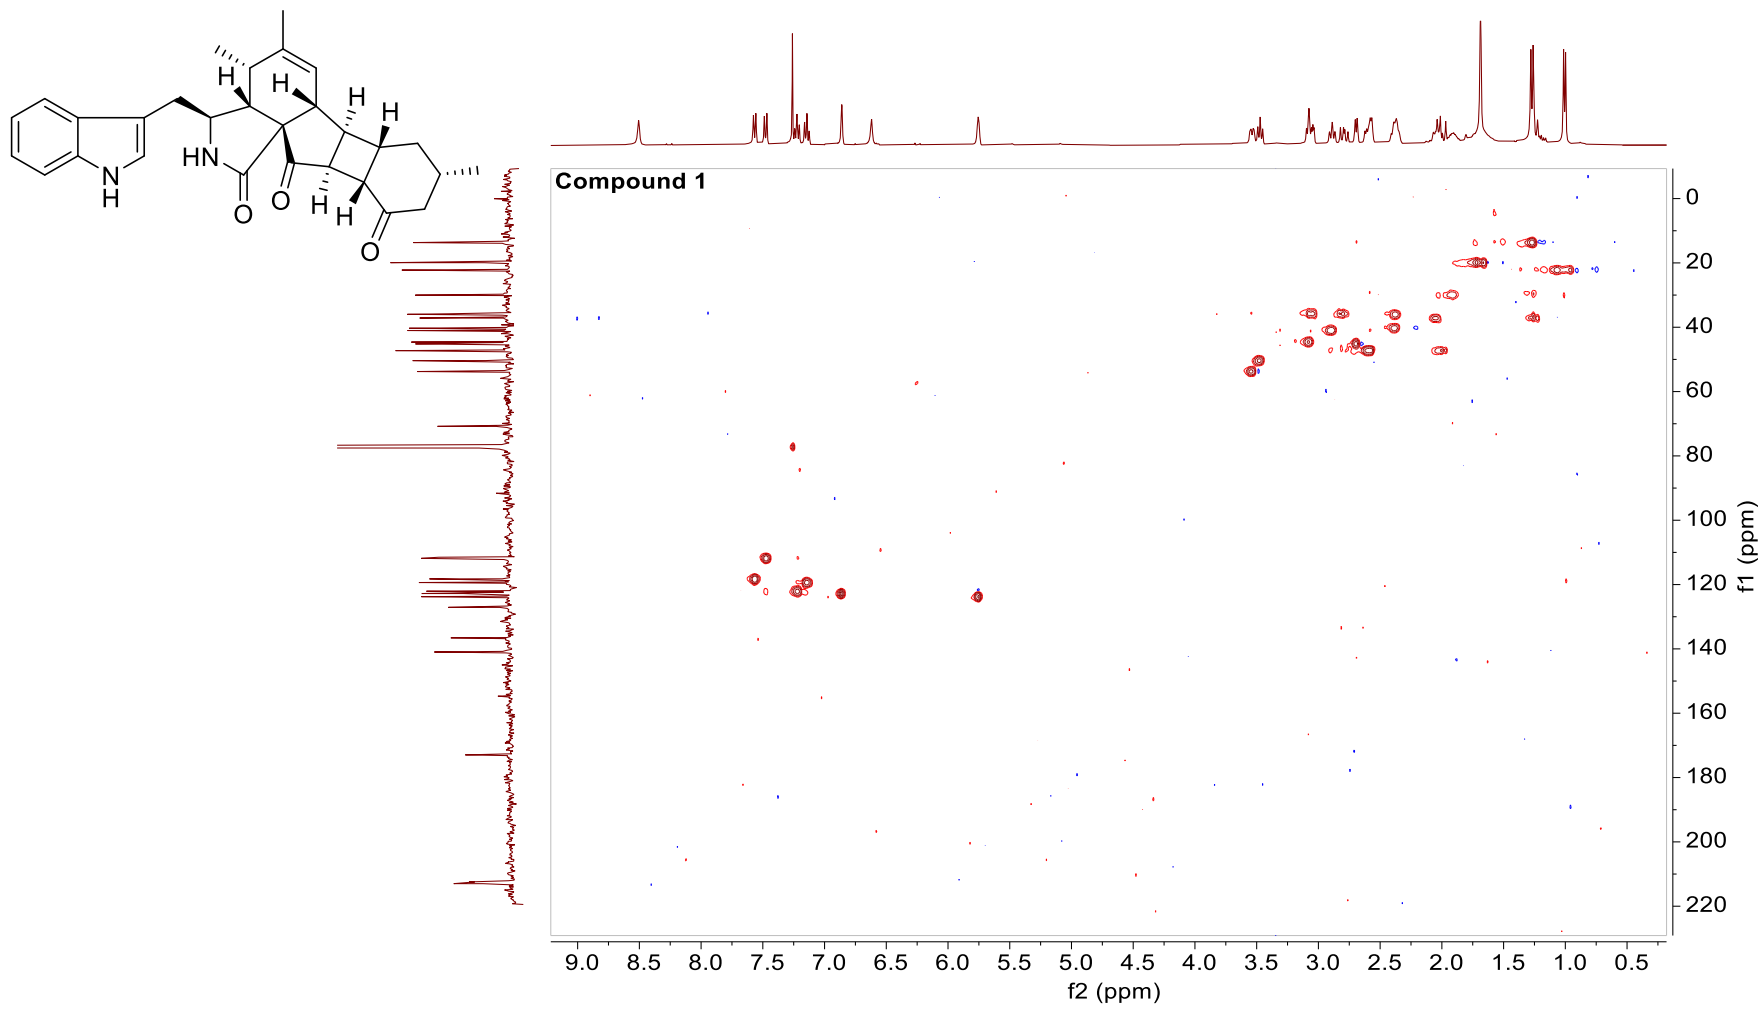

Fig. S10. HMBC spectrum of **1** in CDCl<sub>3</sub>.

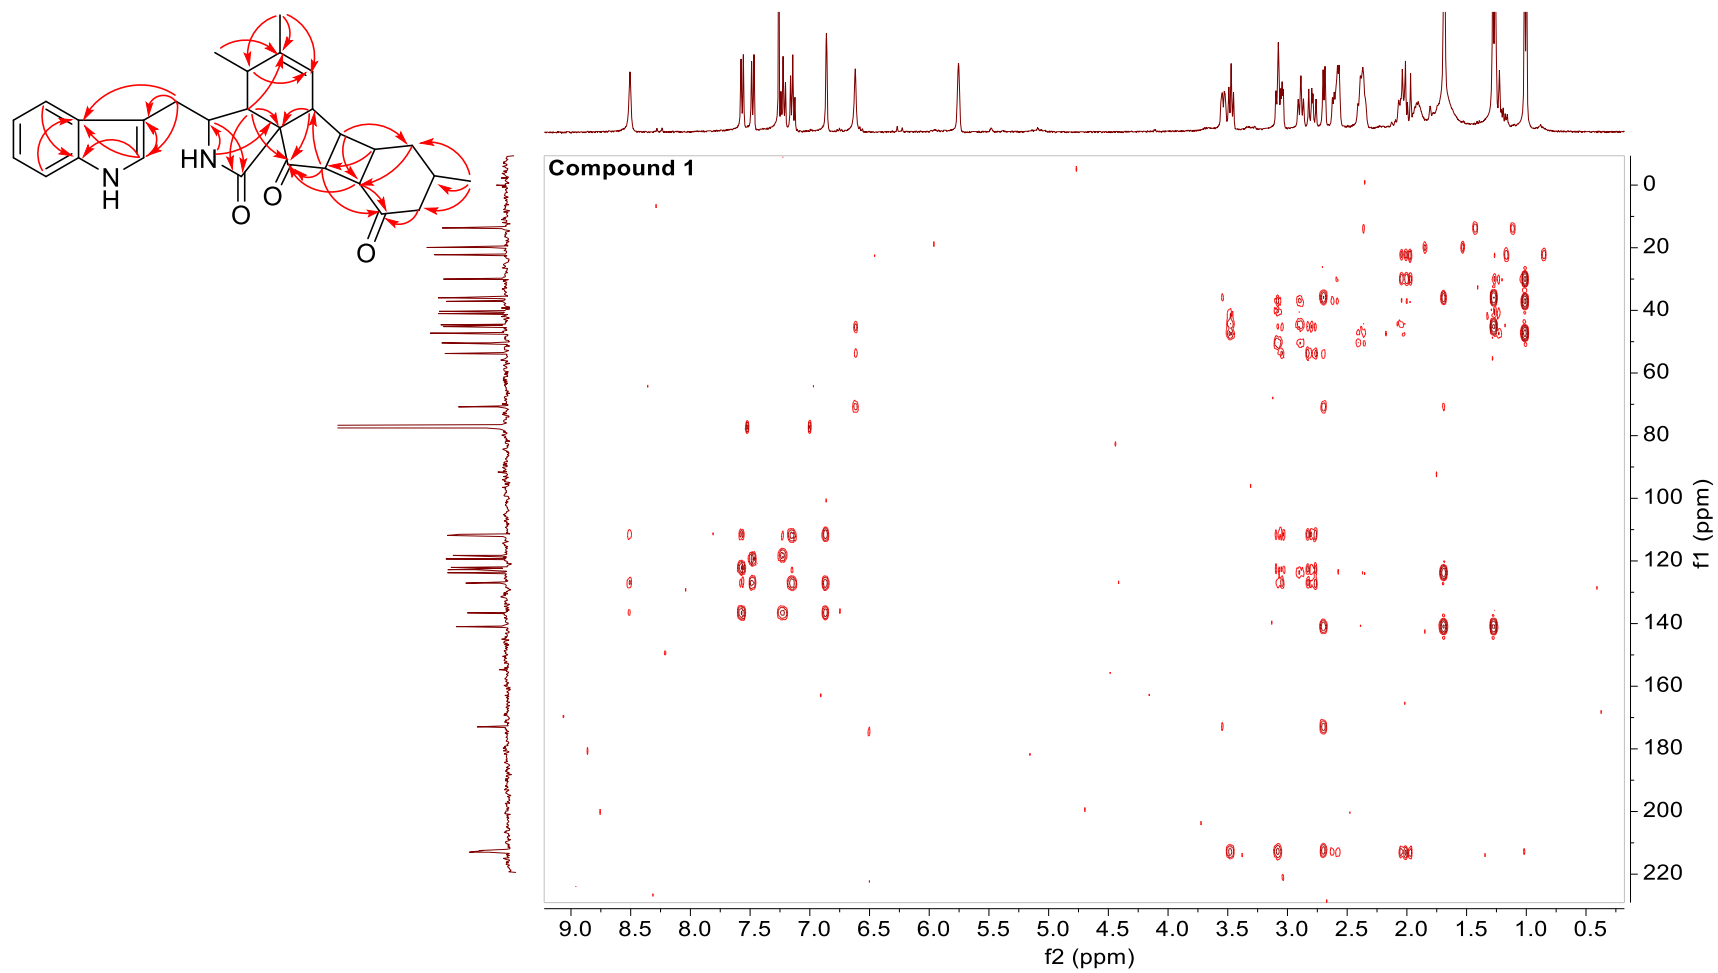

Fig. S11.  $^1\text{H}$ - $^1\text{H}$  COSY spectrum of **1** in  $\text{CDCl}_3$ .

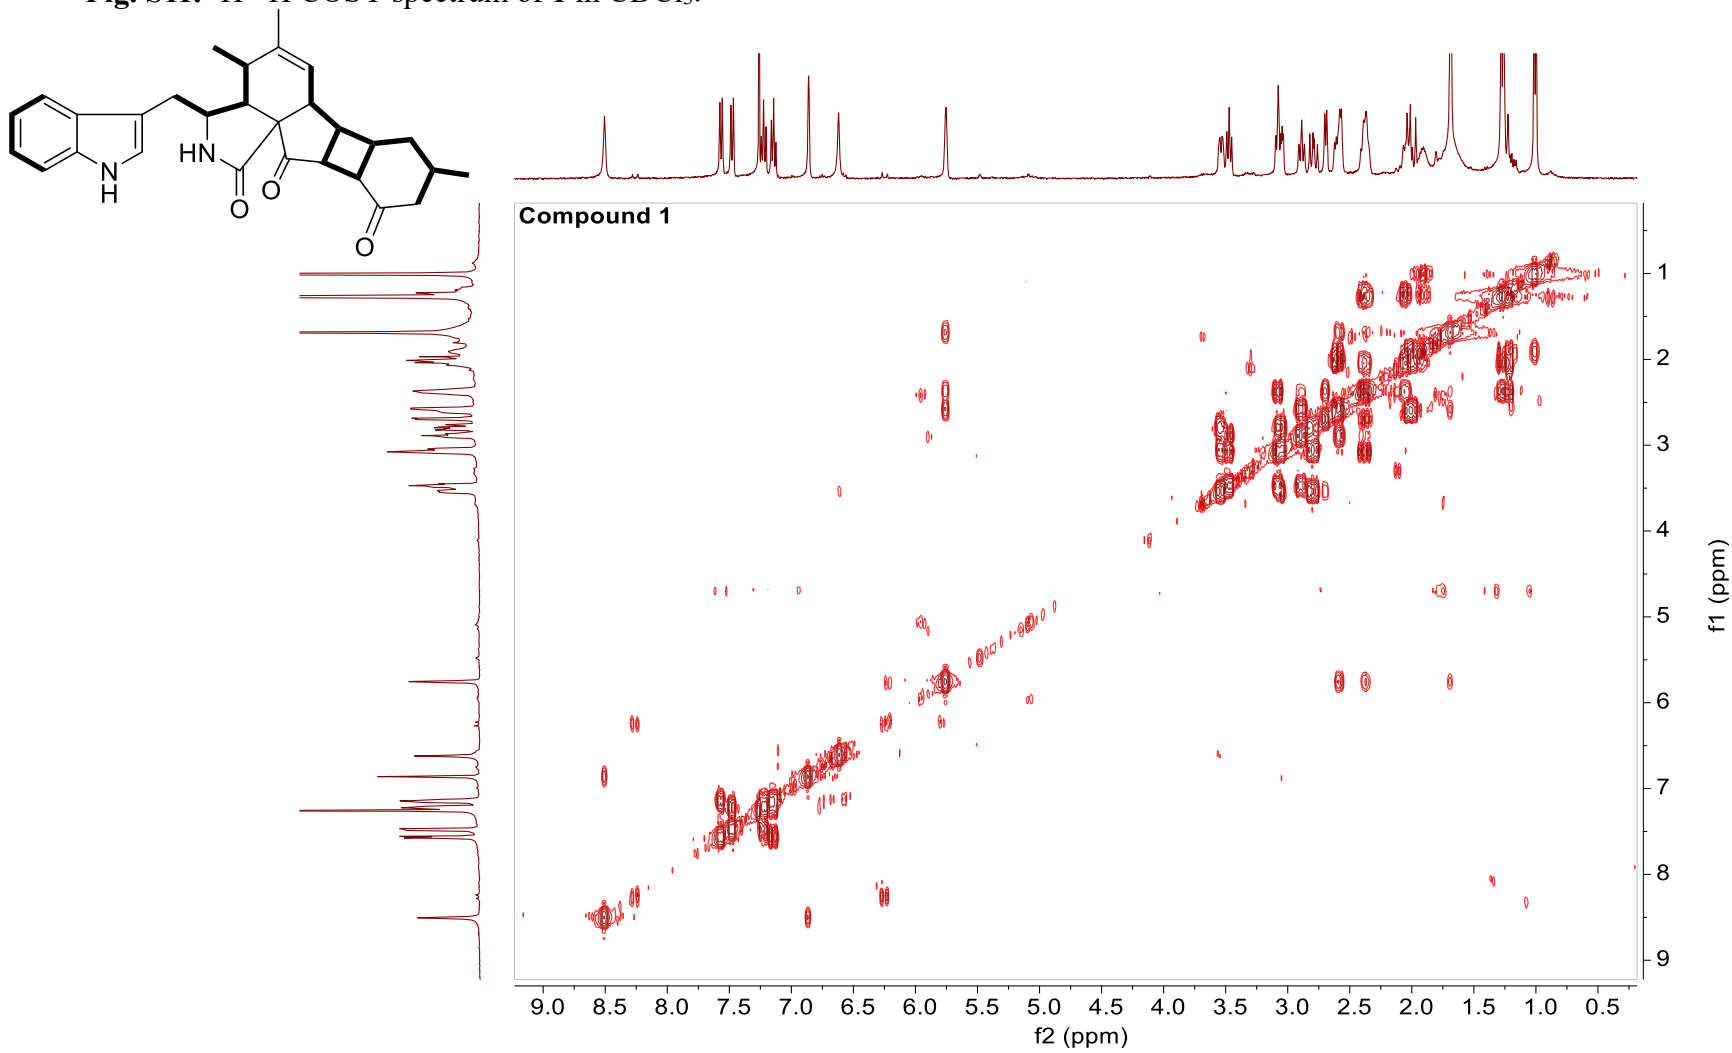

Fig. S12. NOESY spectrum of **1** in CDCl<sub>3</sub>.

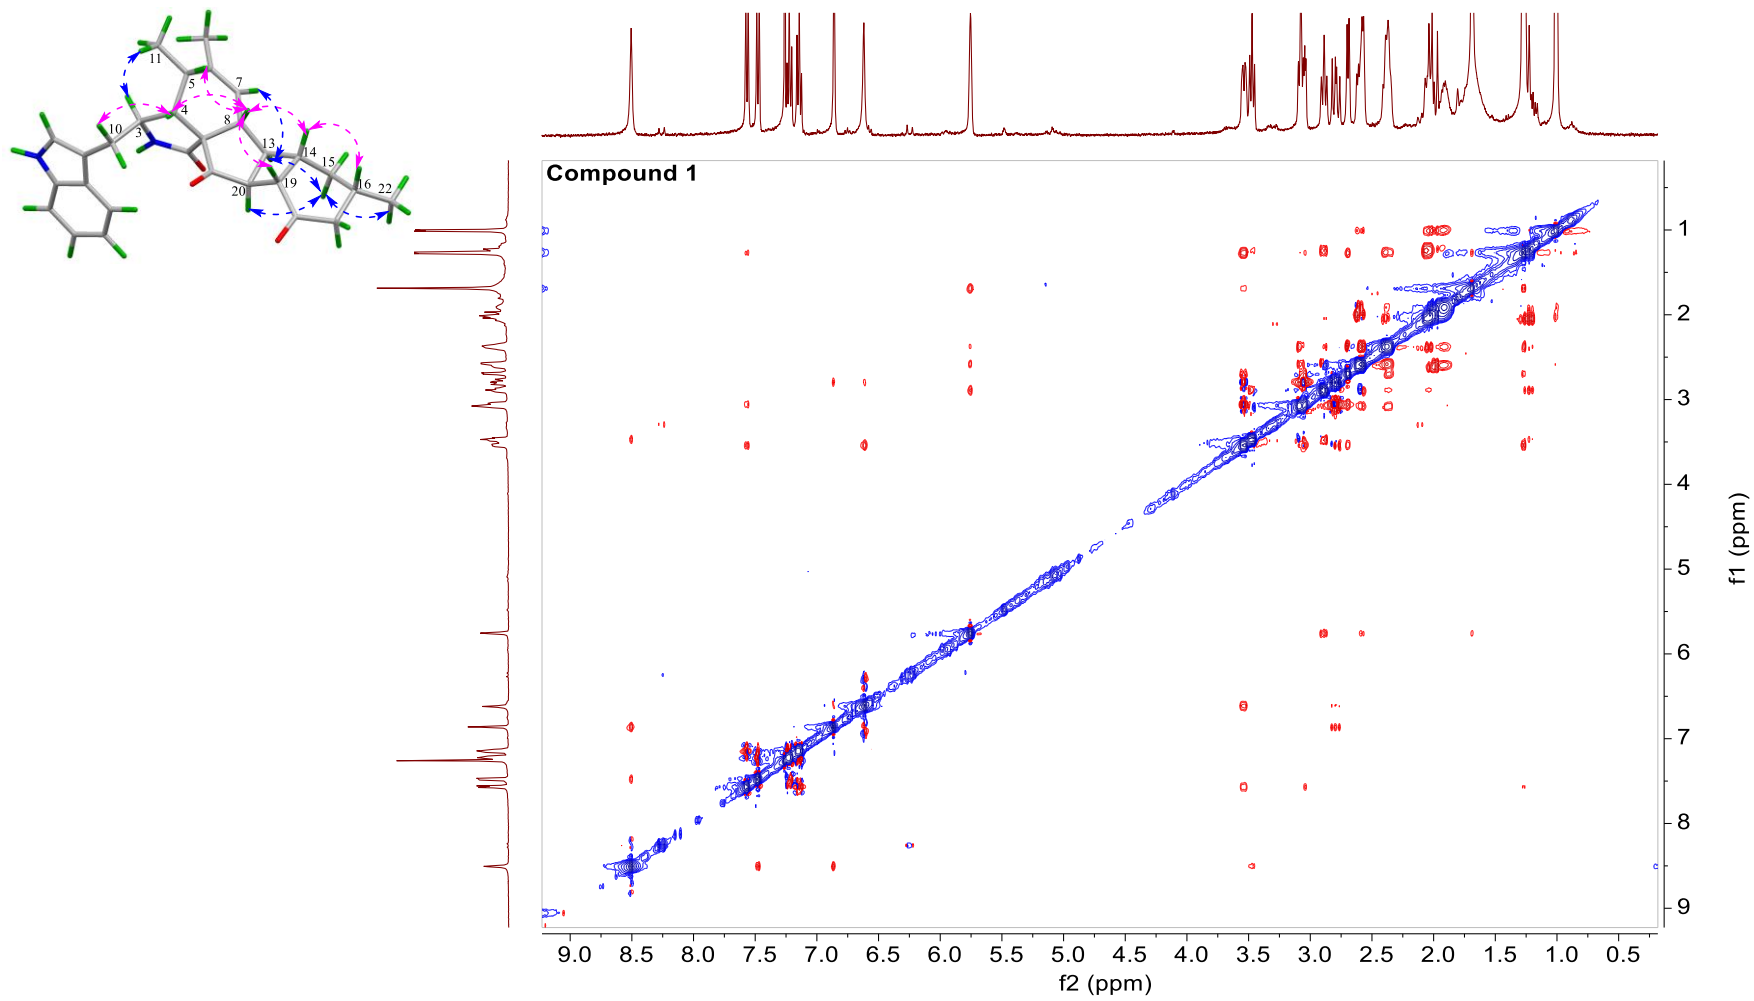

**Fig. S13.** HRESIMS (+) spectrum of **1**.

pss-9 #2-101 RT: 0.02-2.99 AV: 100 NL: 9.85E4  
T: FTMS + p ESI Full ms [100.00-1000.00]

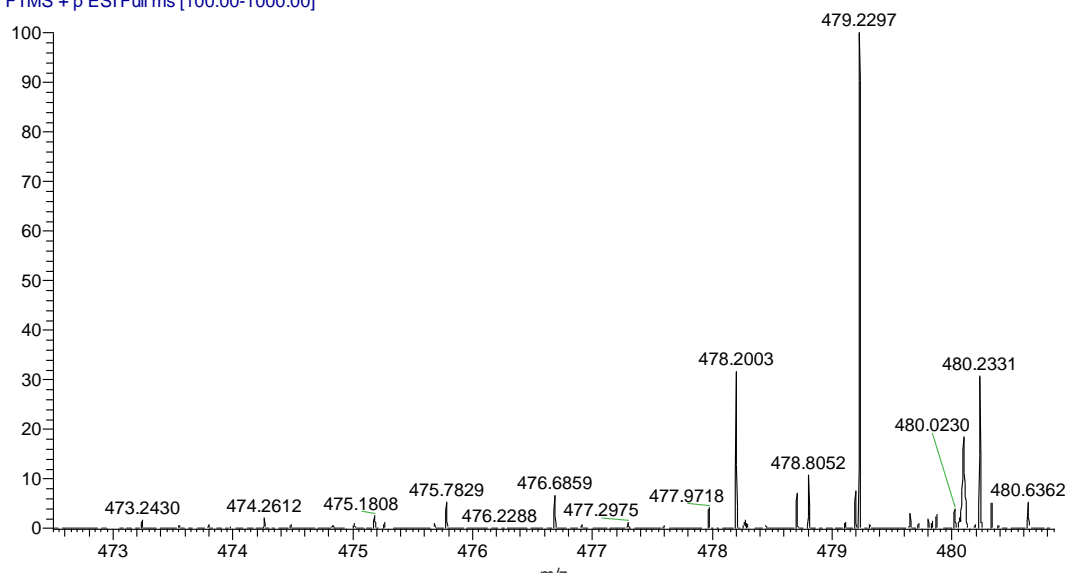

Fig. S14. UV spectrum of 1.

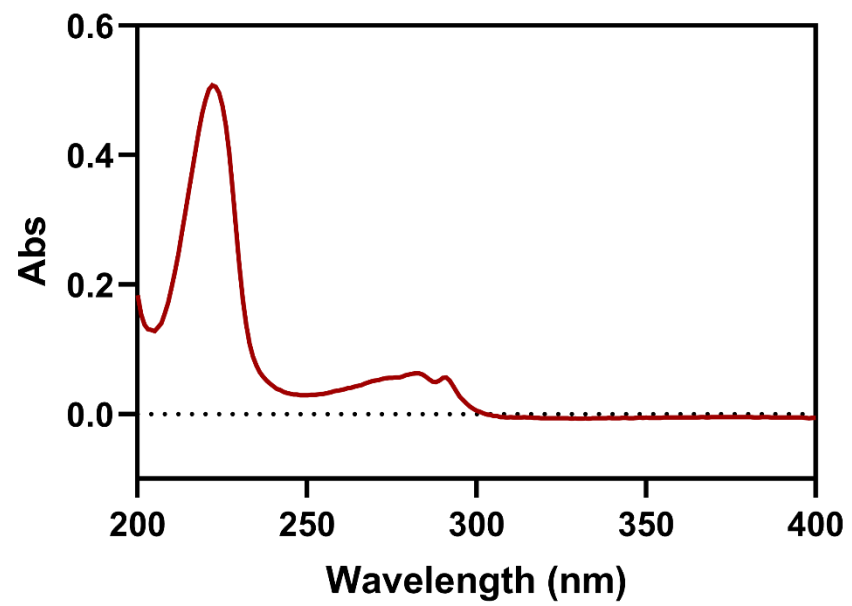

Fig. S15. IR spectrum of 1.

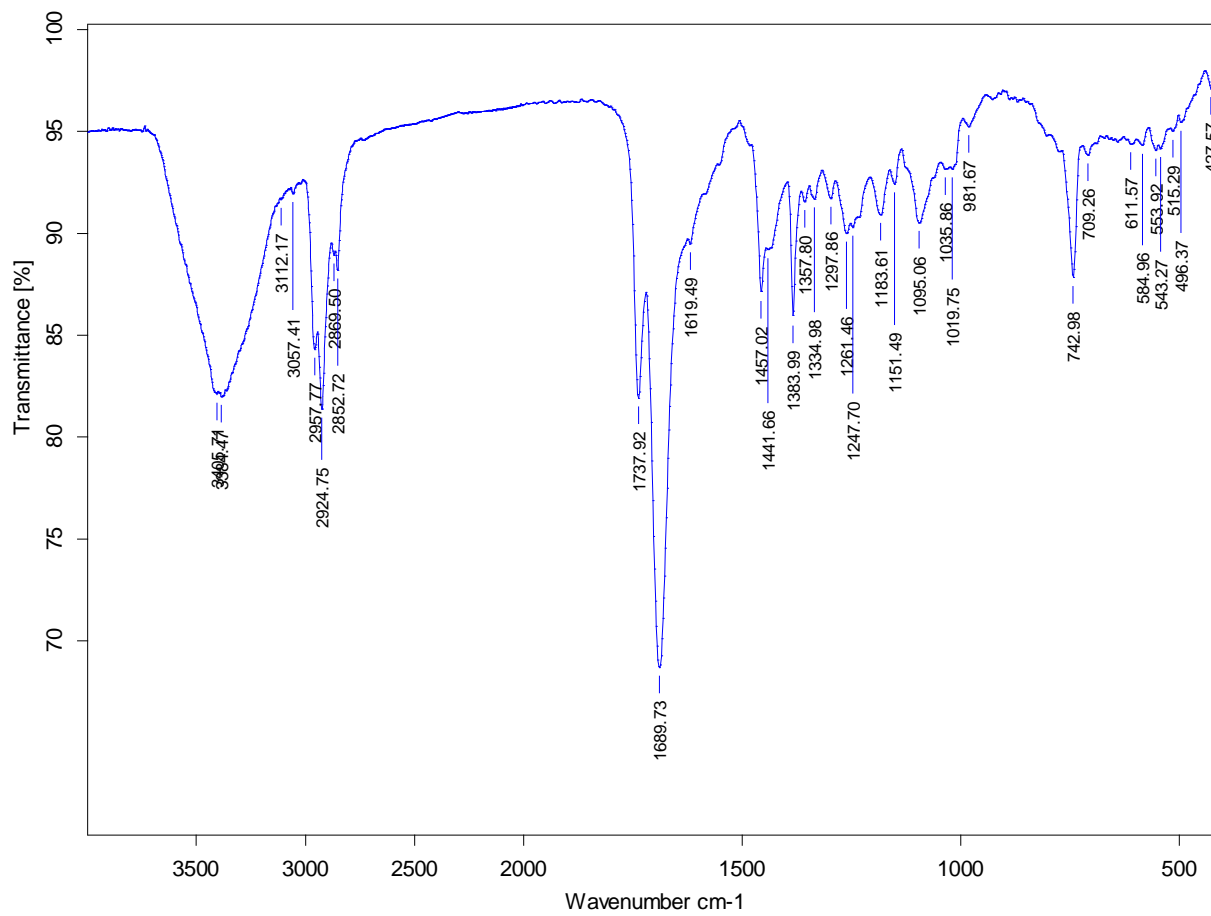



Fig. S16.  $^1\text{H}$  NMR (400 MHz, Pyridine- $d_5$ ) spectrum of **2**.

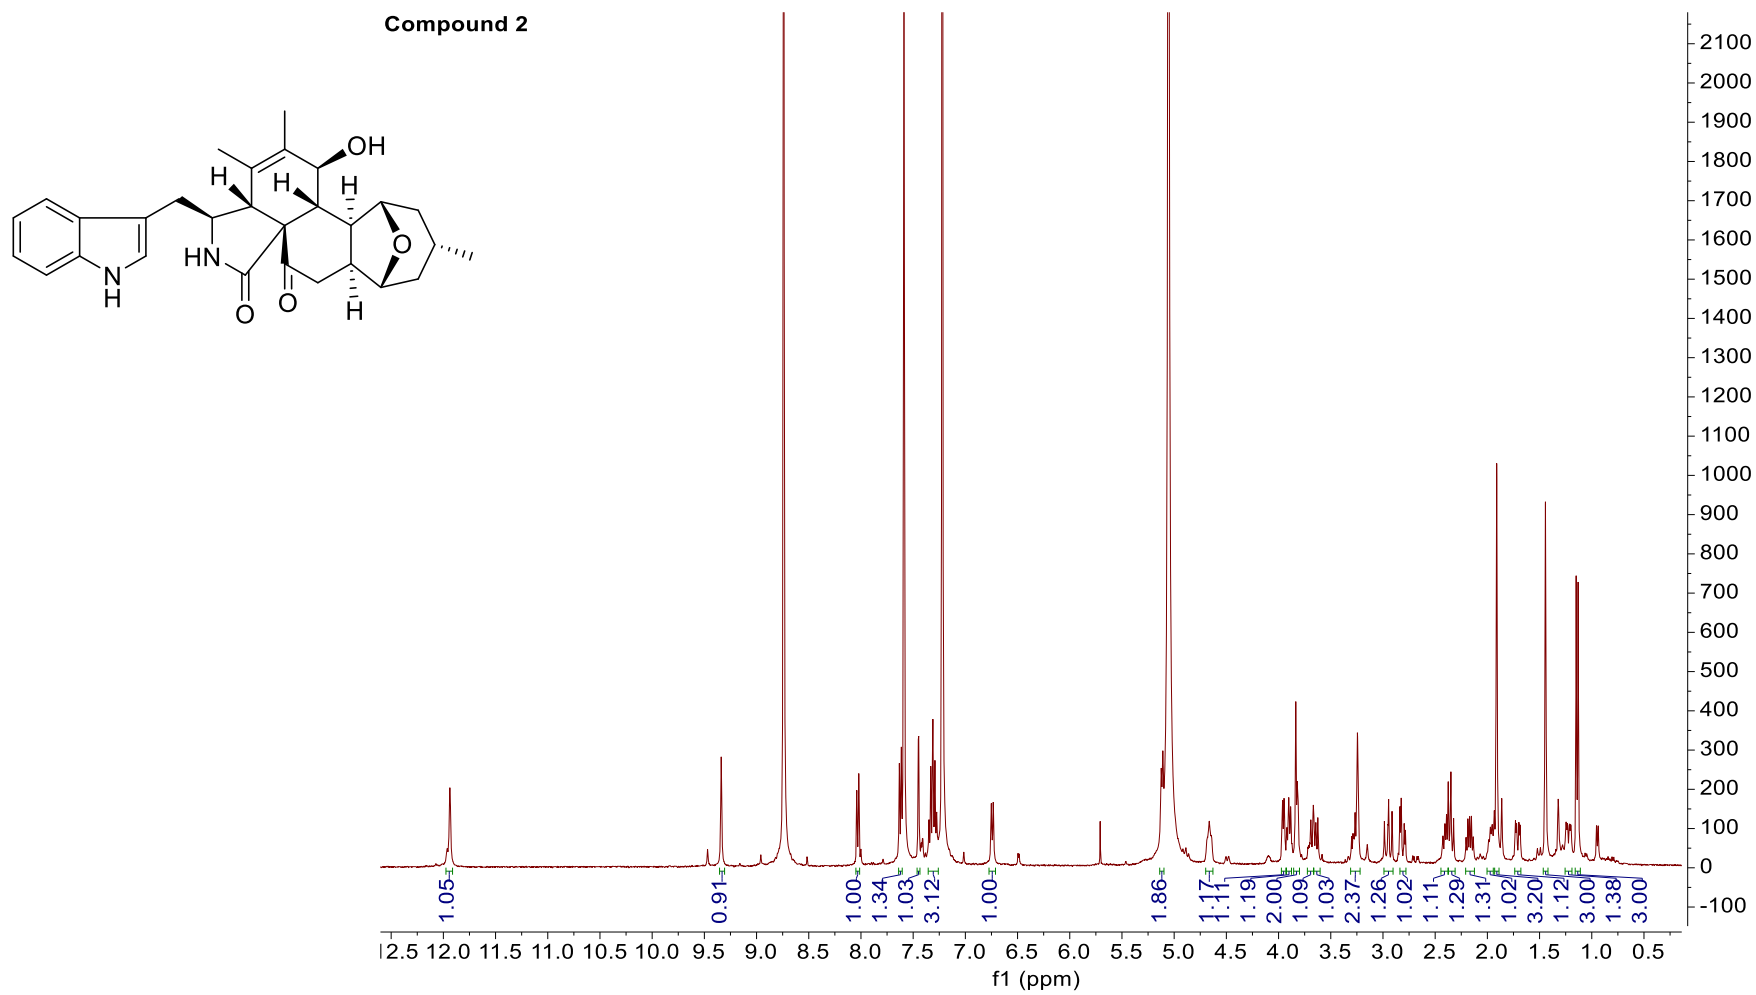

Fig. S17. Enlarged  $^1\text{H}$  NMR (400 MHz, Pyridine- $d_5$ ) spectrum of **2**.

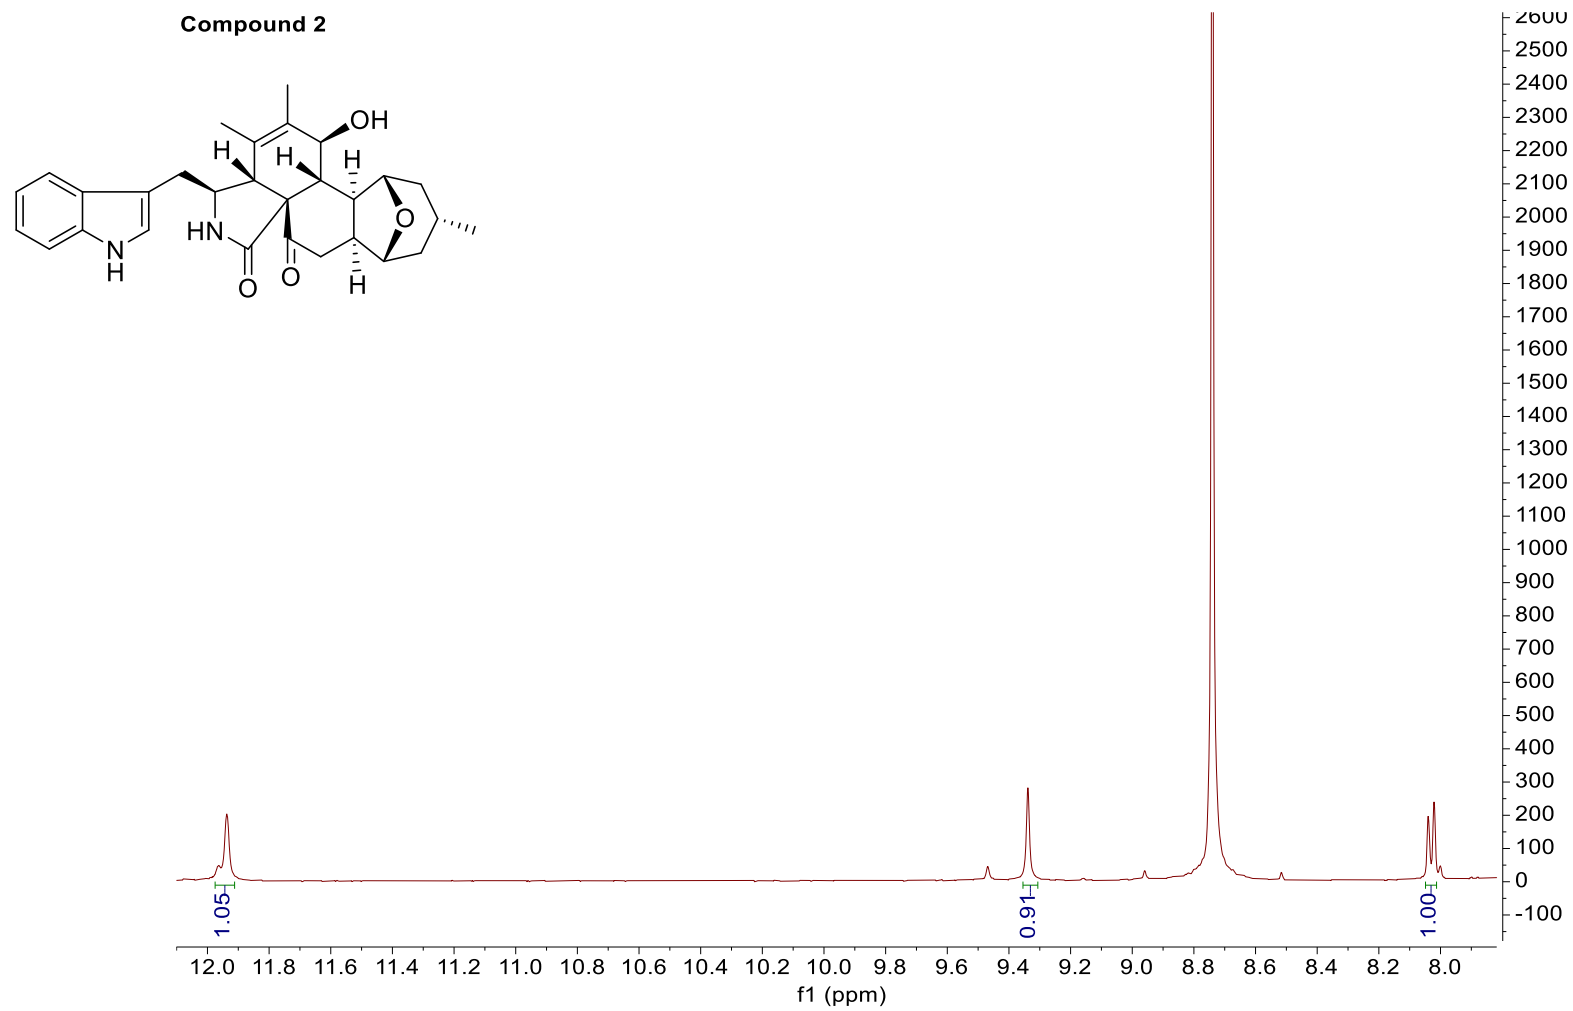

Compound 2

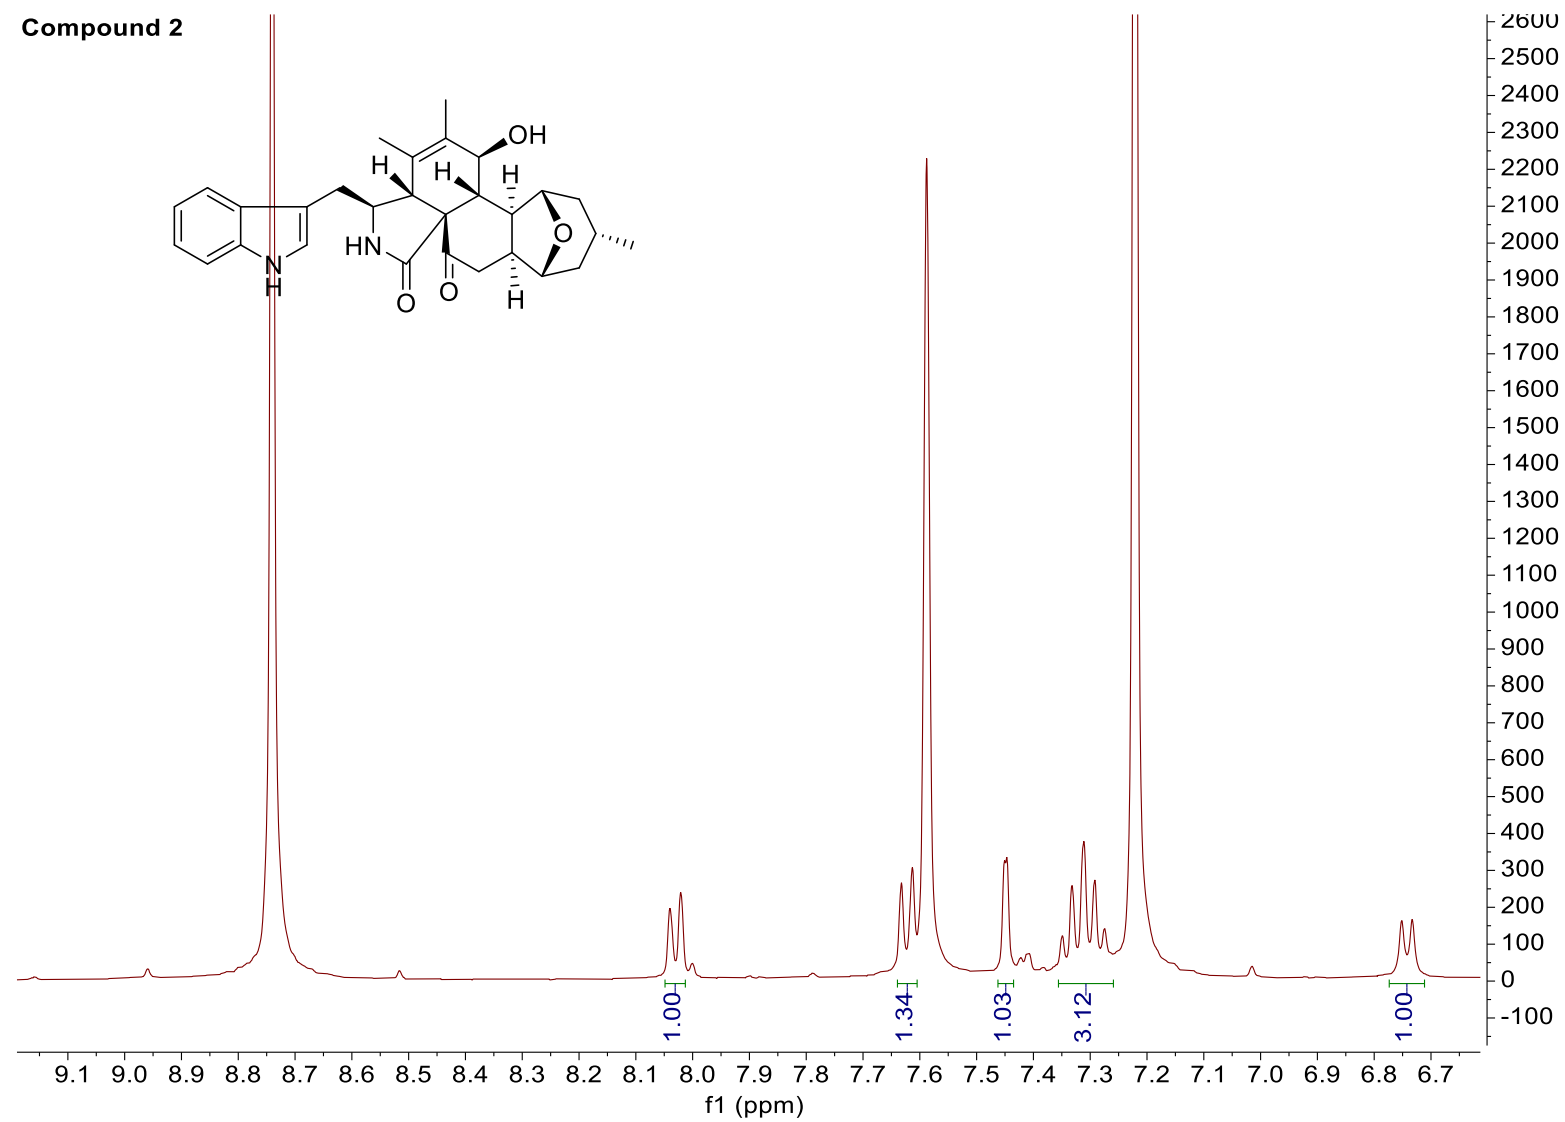

Compound 2

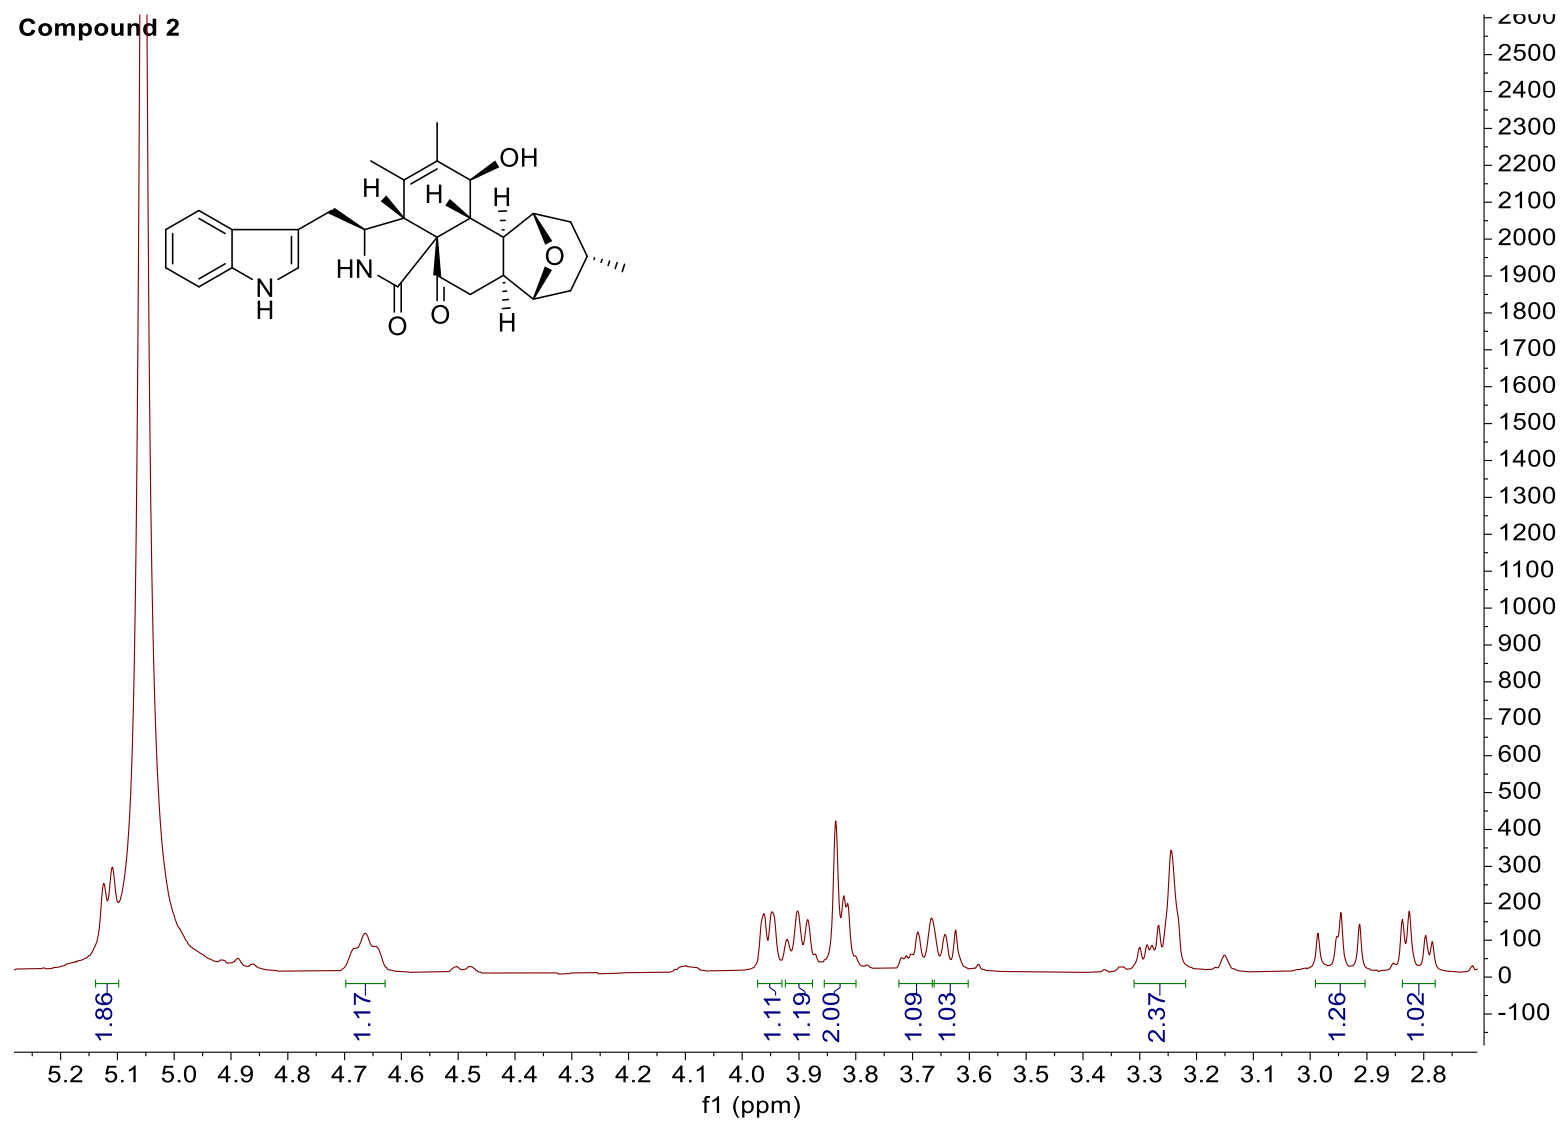

Compound 2

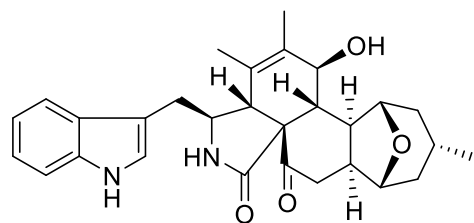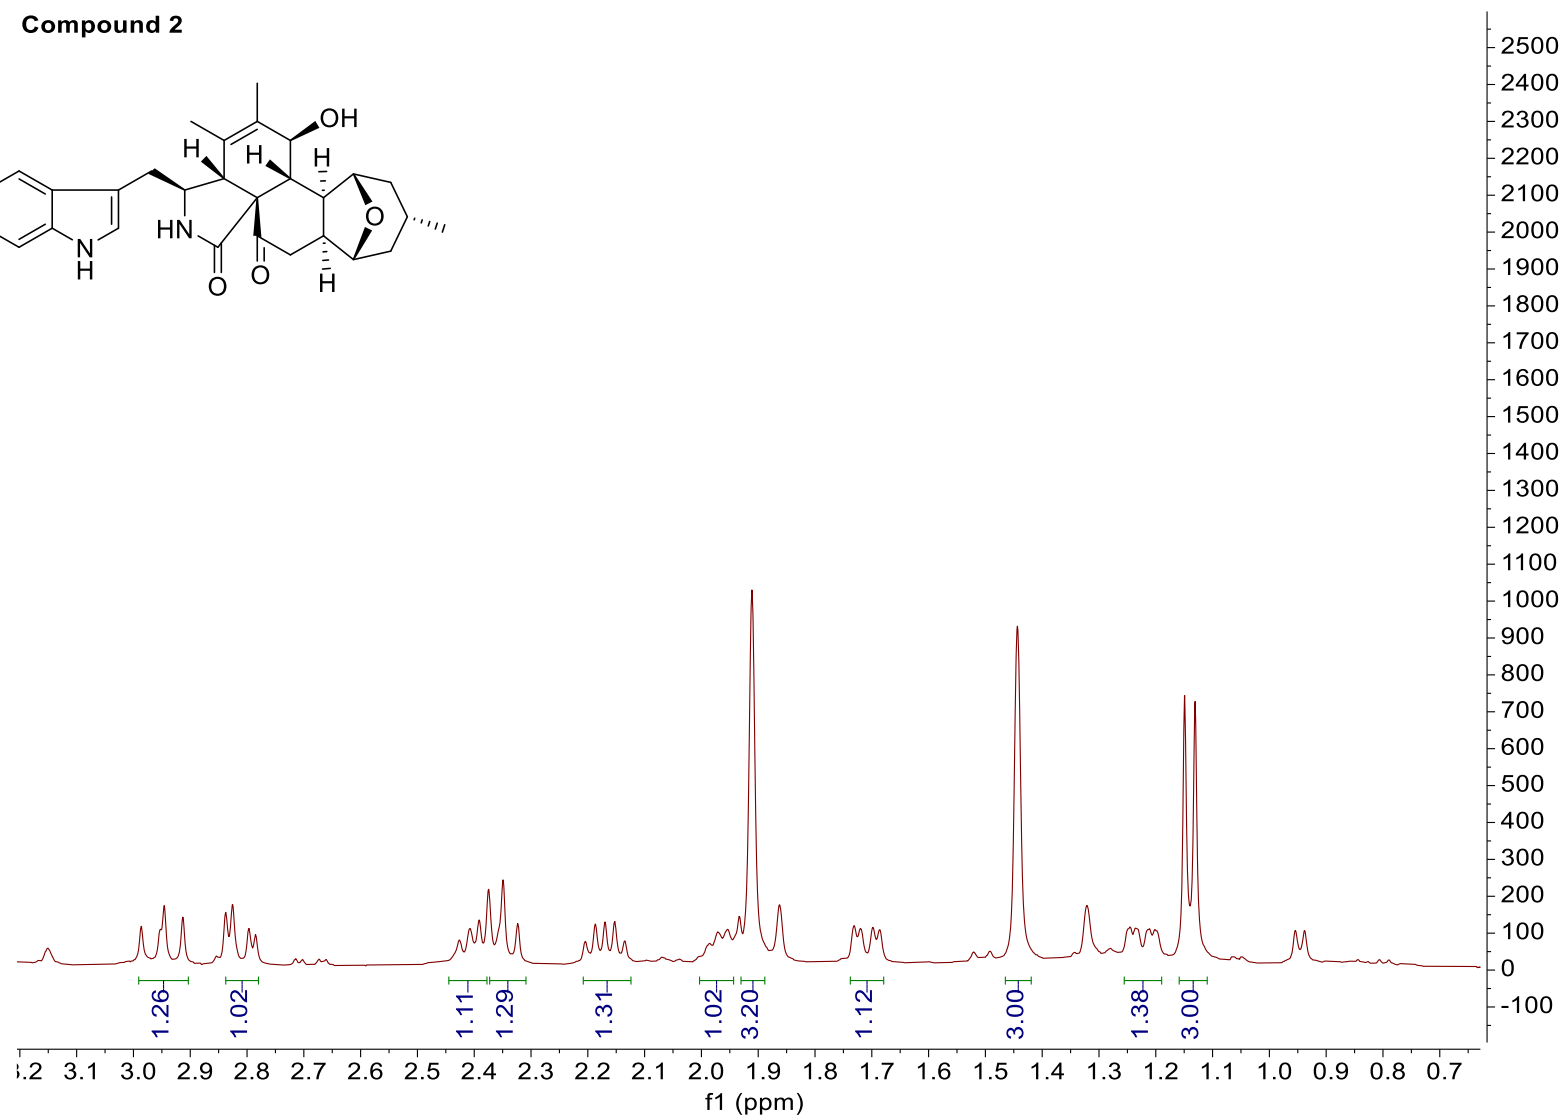

Fig. S18.  $^{13}\text{C}$  NMR (100 MHz, Pyridine- $d_5$ ) spectrum of **2**.

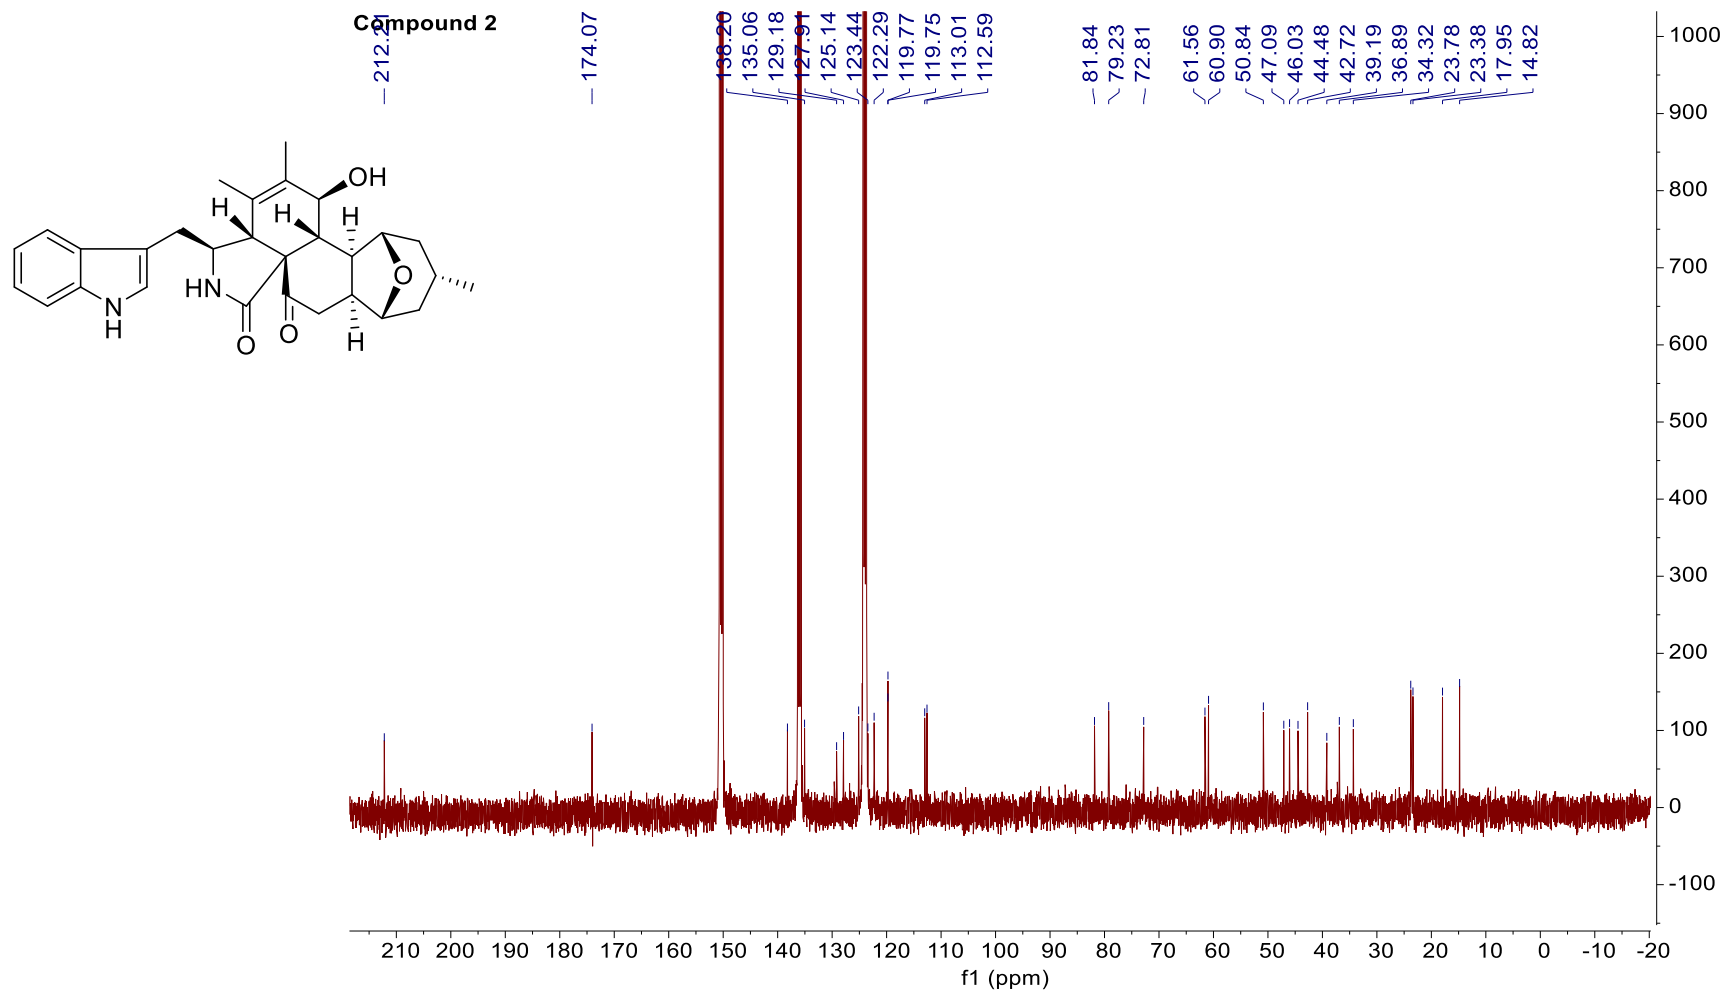

Fig. S19. DEPT-135 (100 MHz, Pyridine-*d*<sub>5</sub>) spectrum of **2**.

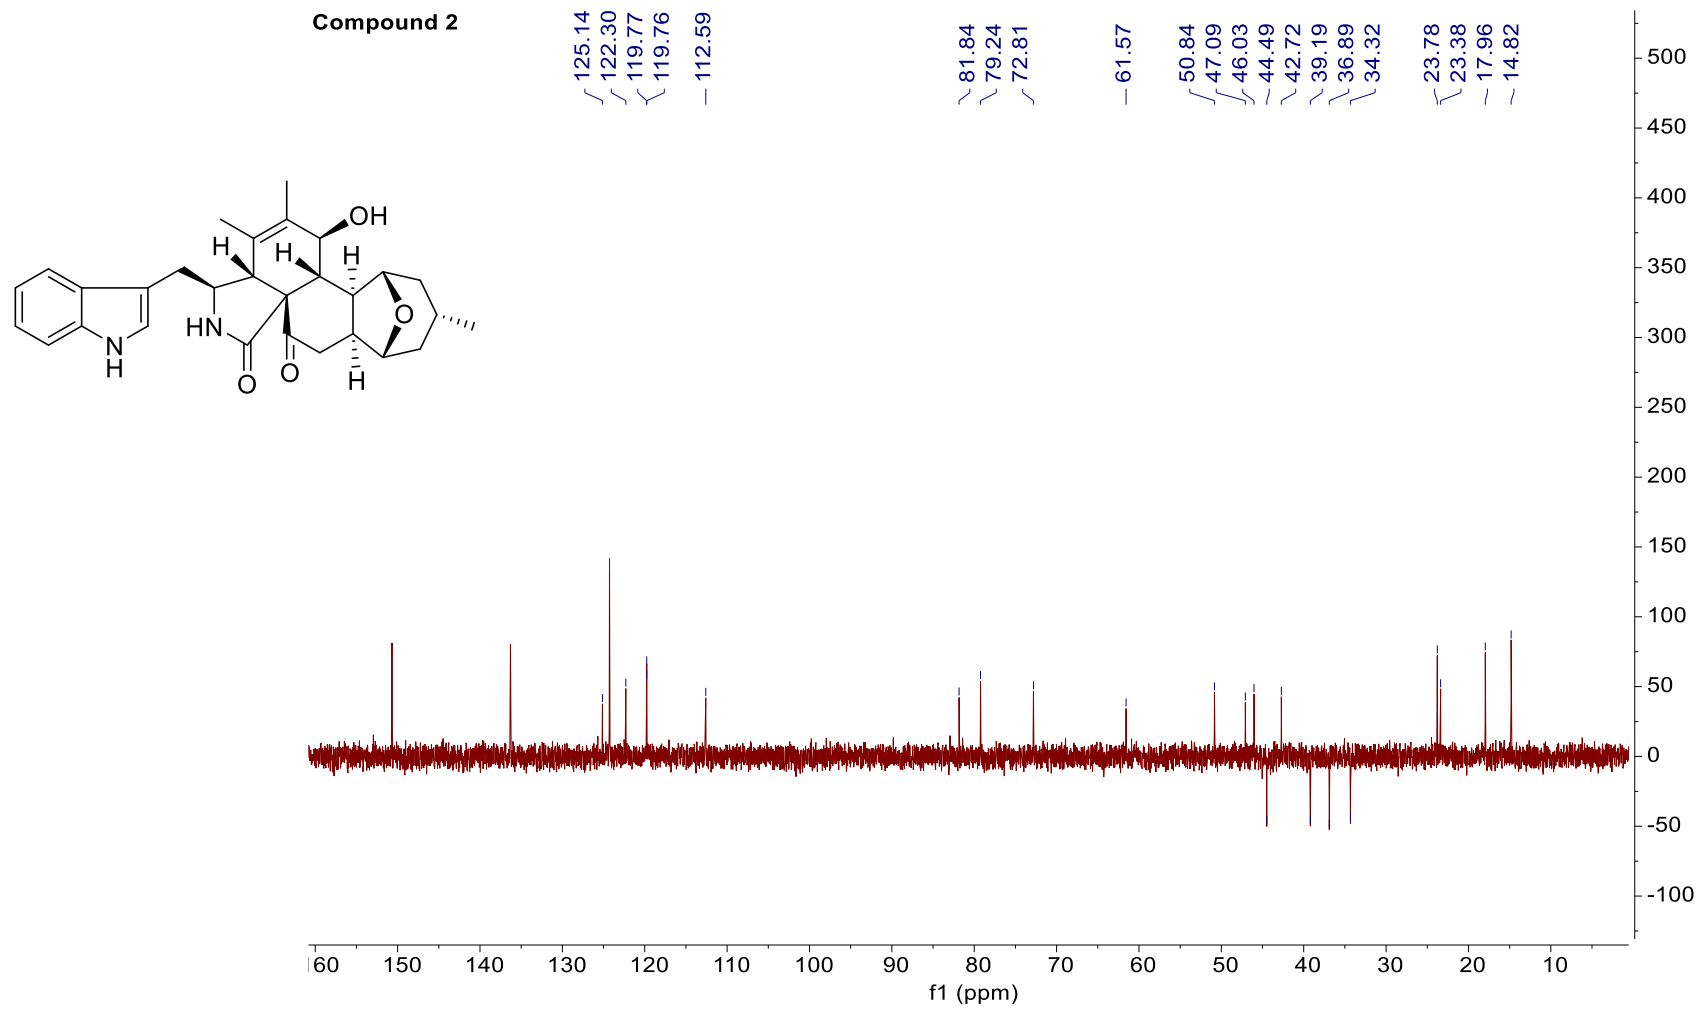

Fig. S20. HSQC spectrum of 2 in Pyridine-*d*<sub>5</sub>.

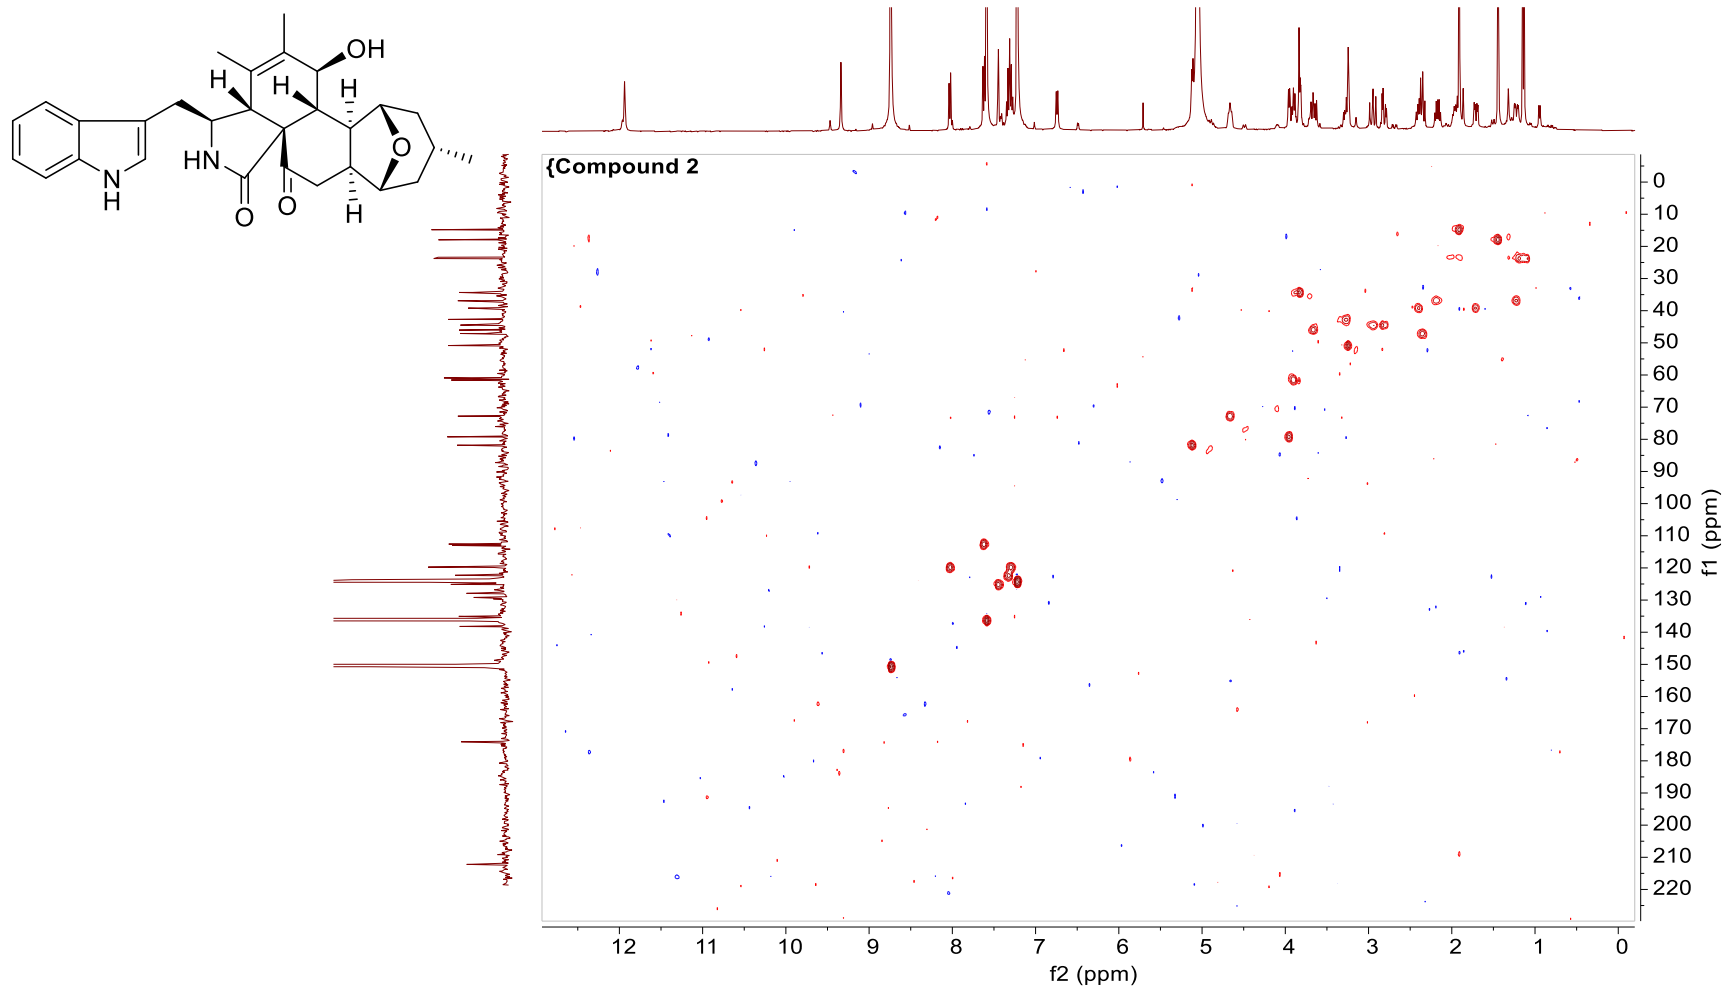



Fig. S21. HMBC spectrum of **2** in Pyridine-*d*<sub>5</sub>.

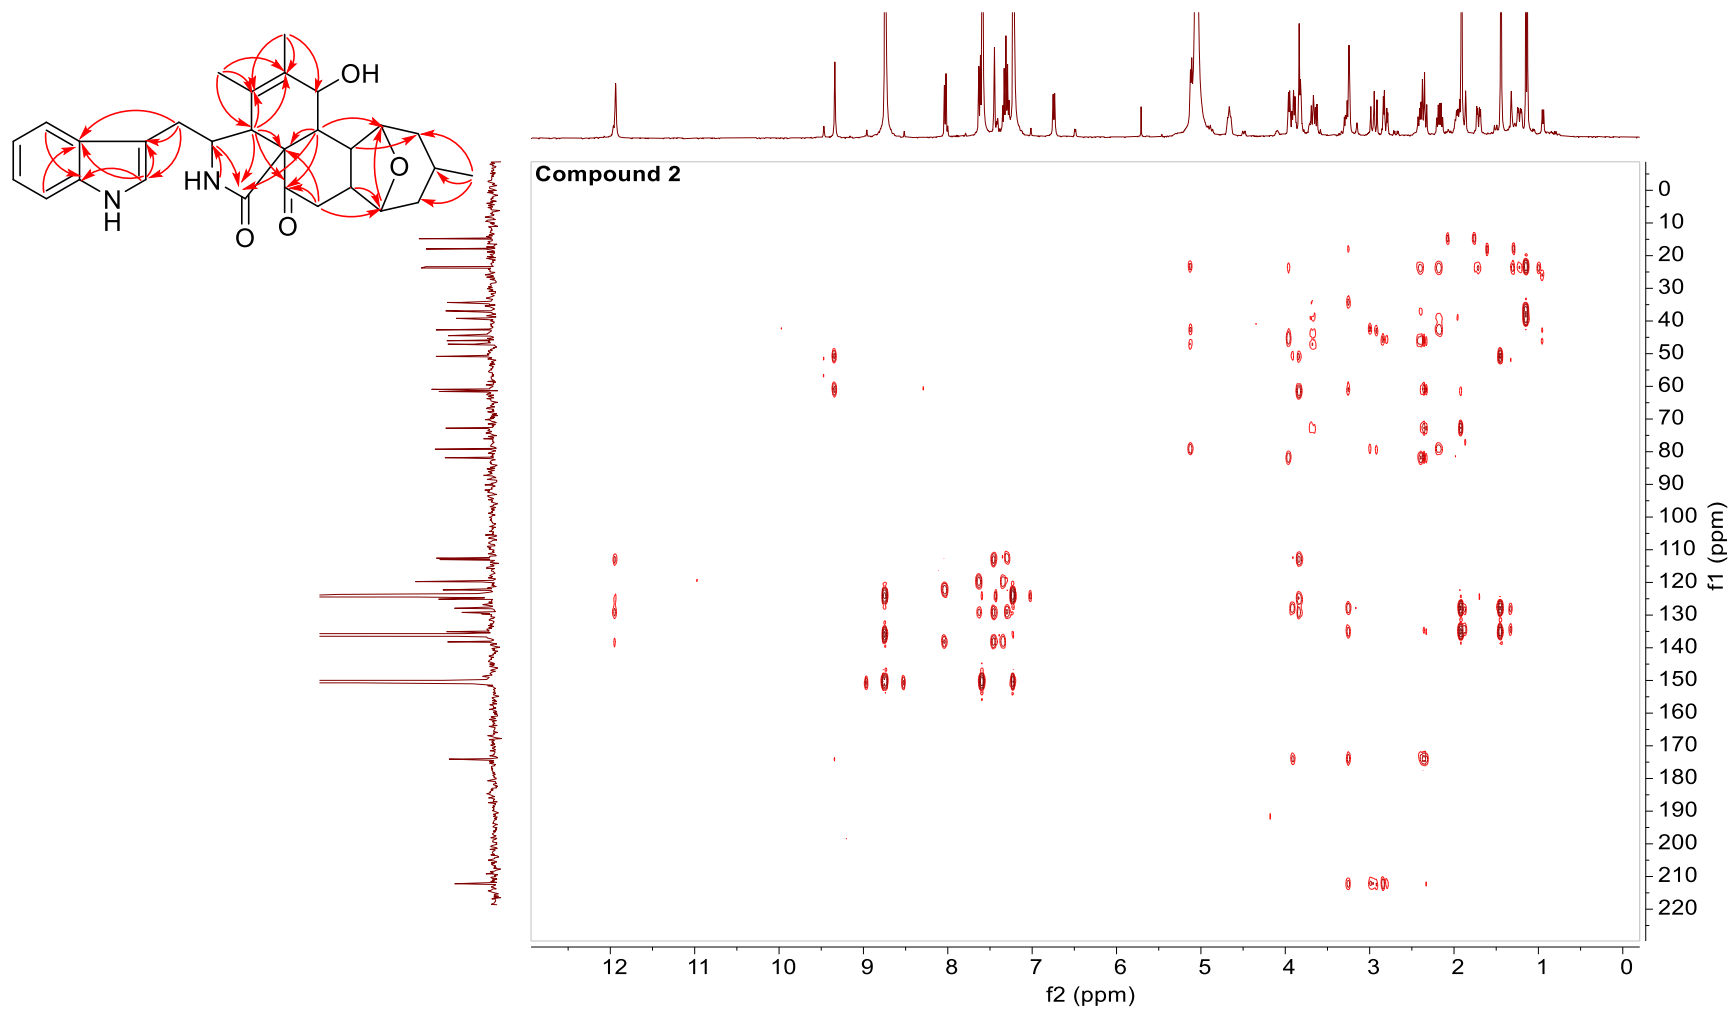

Fig. S22.  $^1\text{H}$ - $^1\text{H}$  COSY spectrum of **2** in Pyridine- $d_5$ .

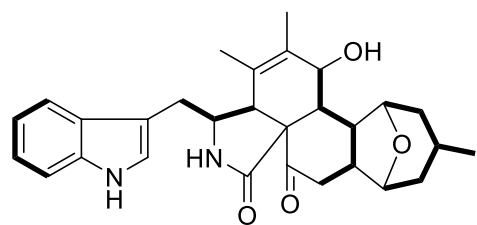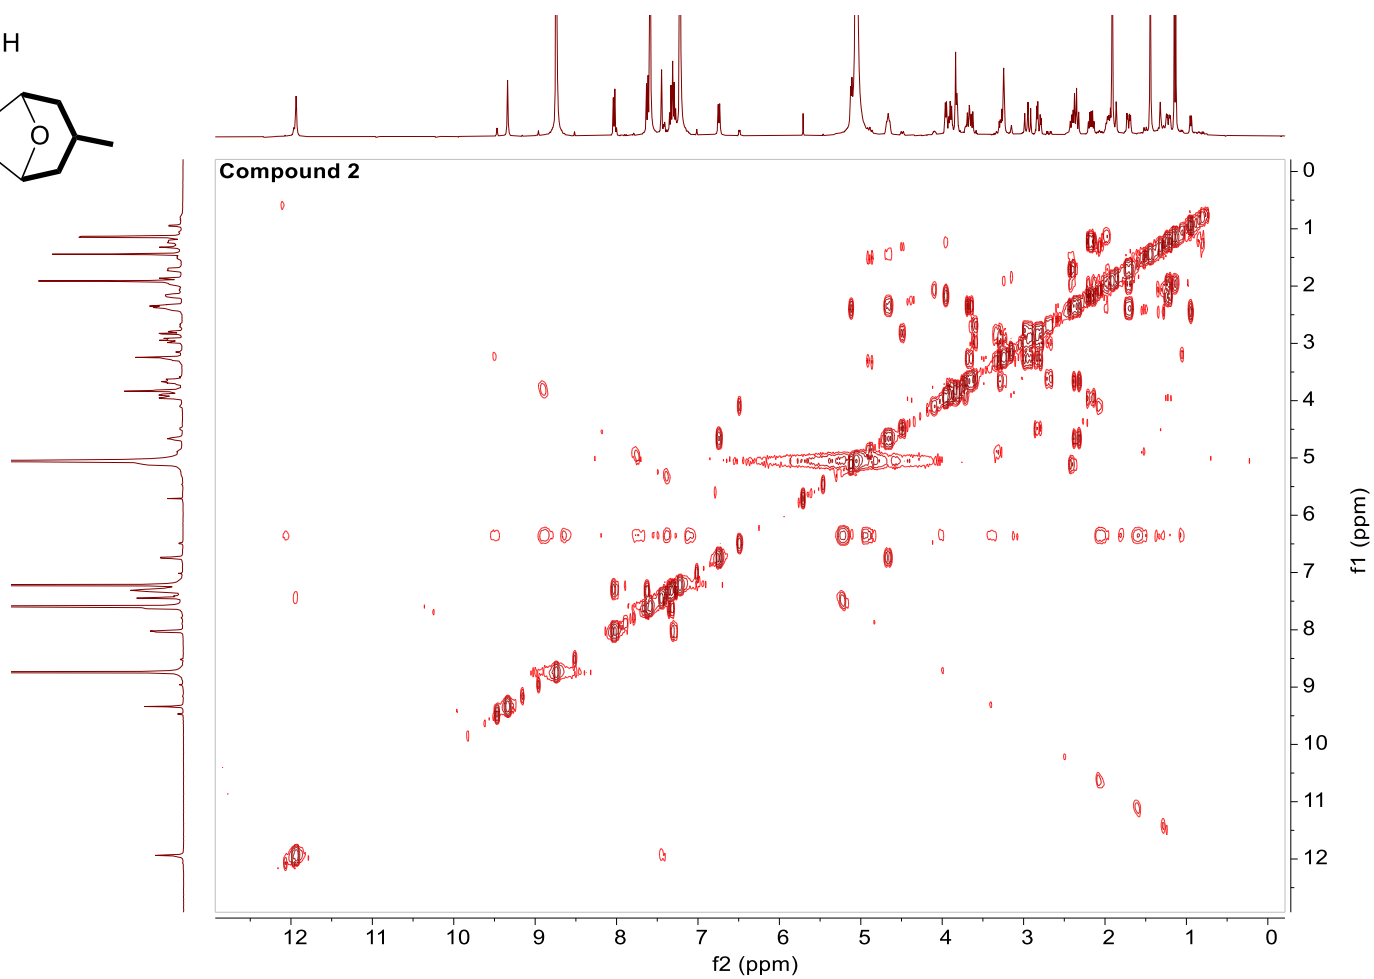

Fig. S23. NOESY spectrum of **2** in Pyridine-*d*<sub>5</sub>.

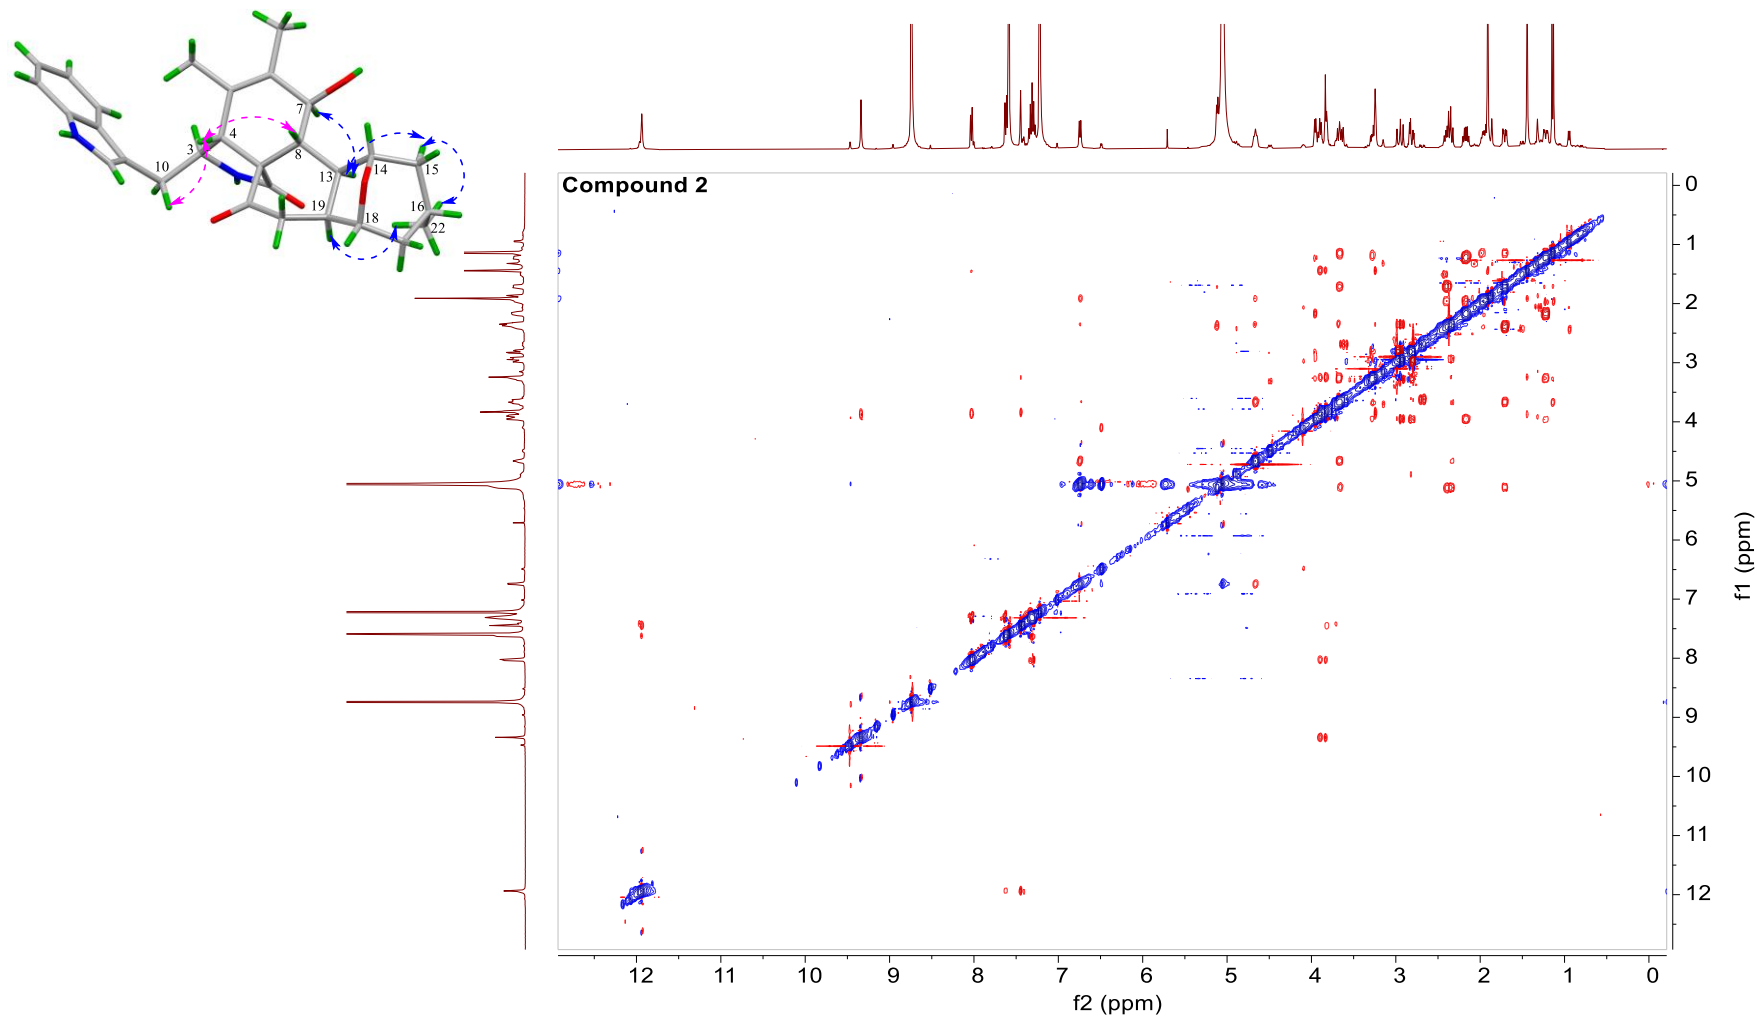

**Fig. S24.** HRESIMS (+) spectrum of **2**.

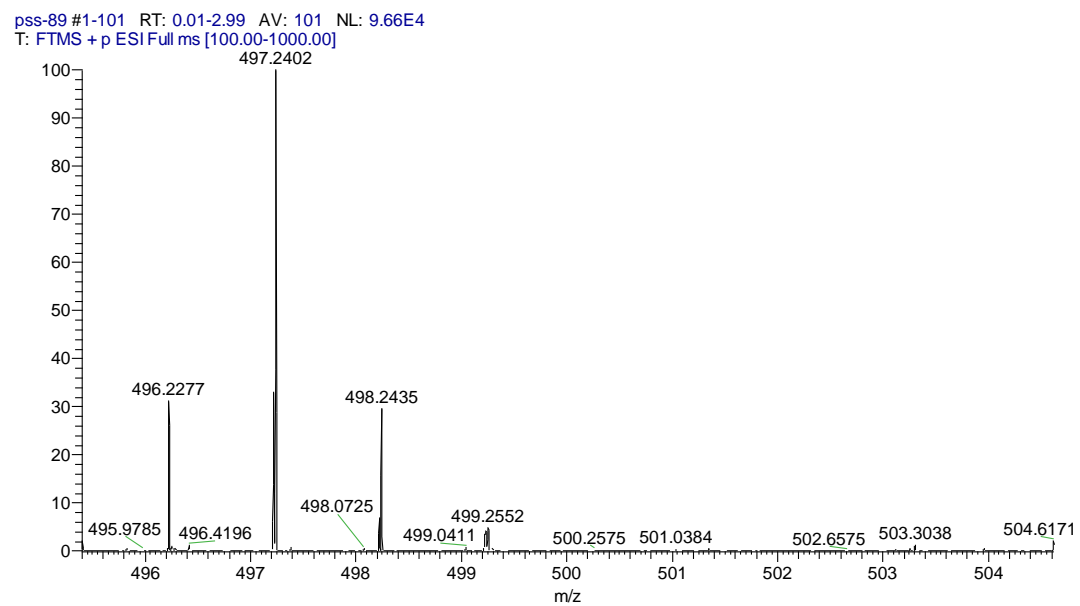

Fig. S25. UV spectrum of 2.

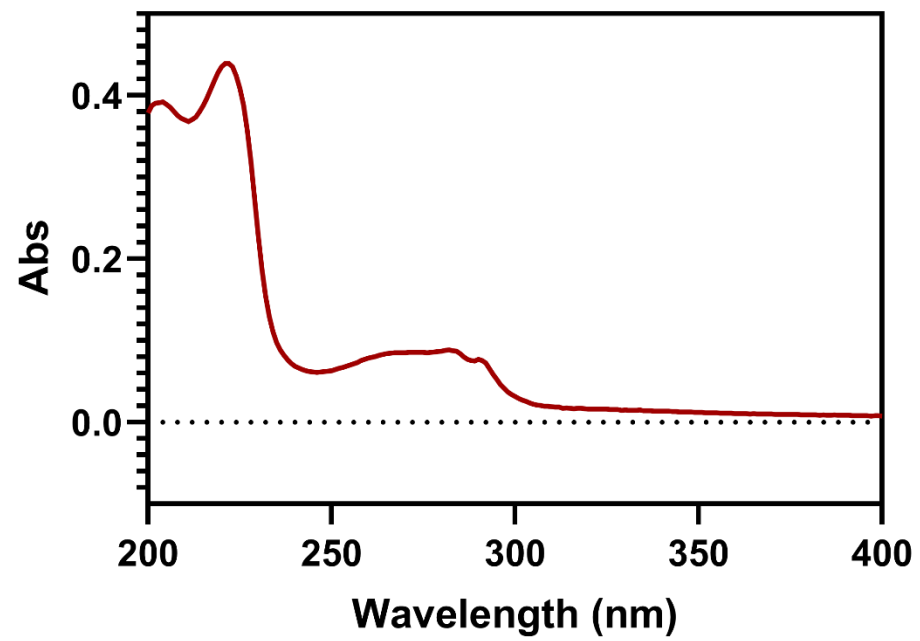

Fig. S26. IR spectrum of 2.

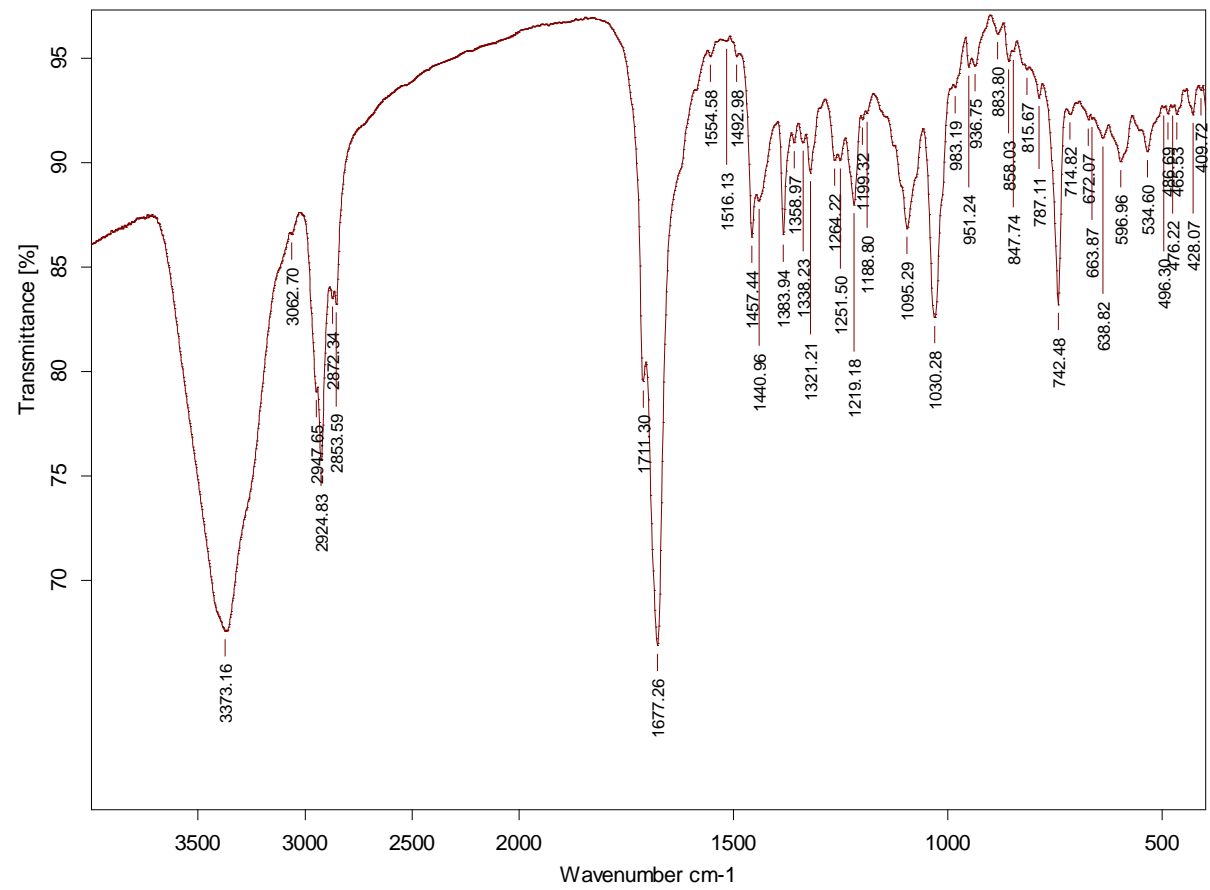

Fig. S27. ECD spectrum of 2.

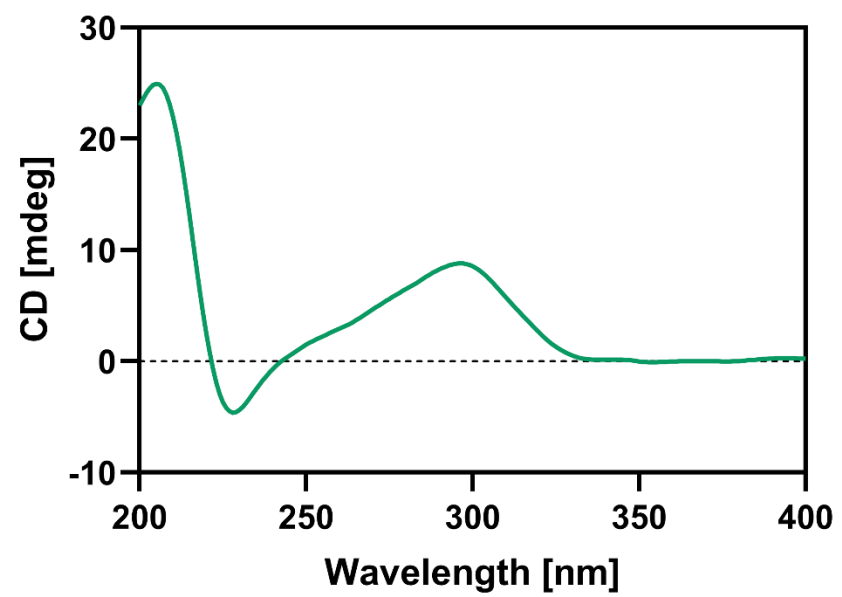

Fig. S28.  $^1\text{H}$  NMR (400 MHz,  $\text{DMSO-}d_6$ ) spectrum of **3**.

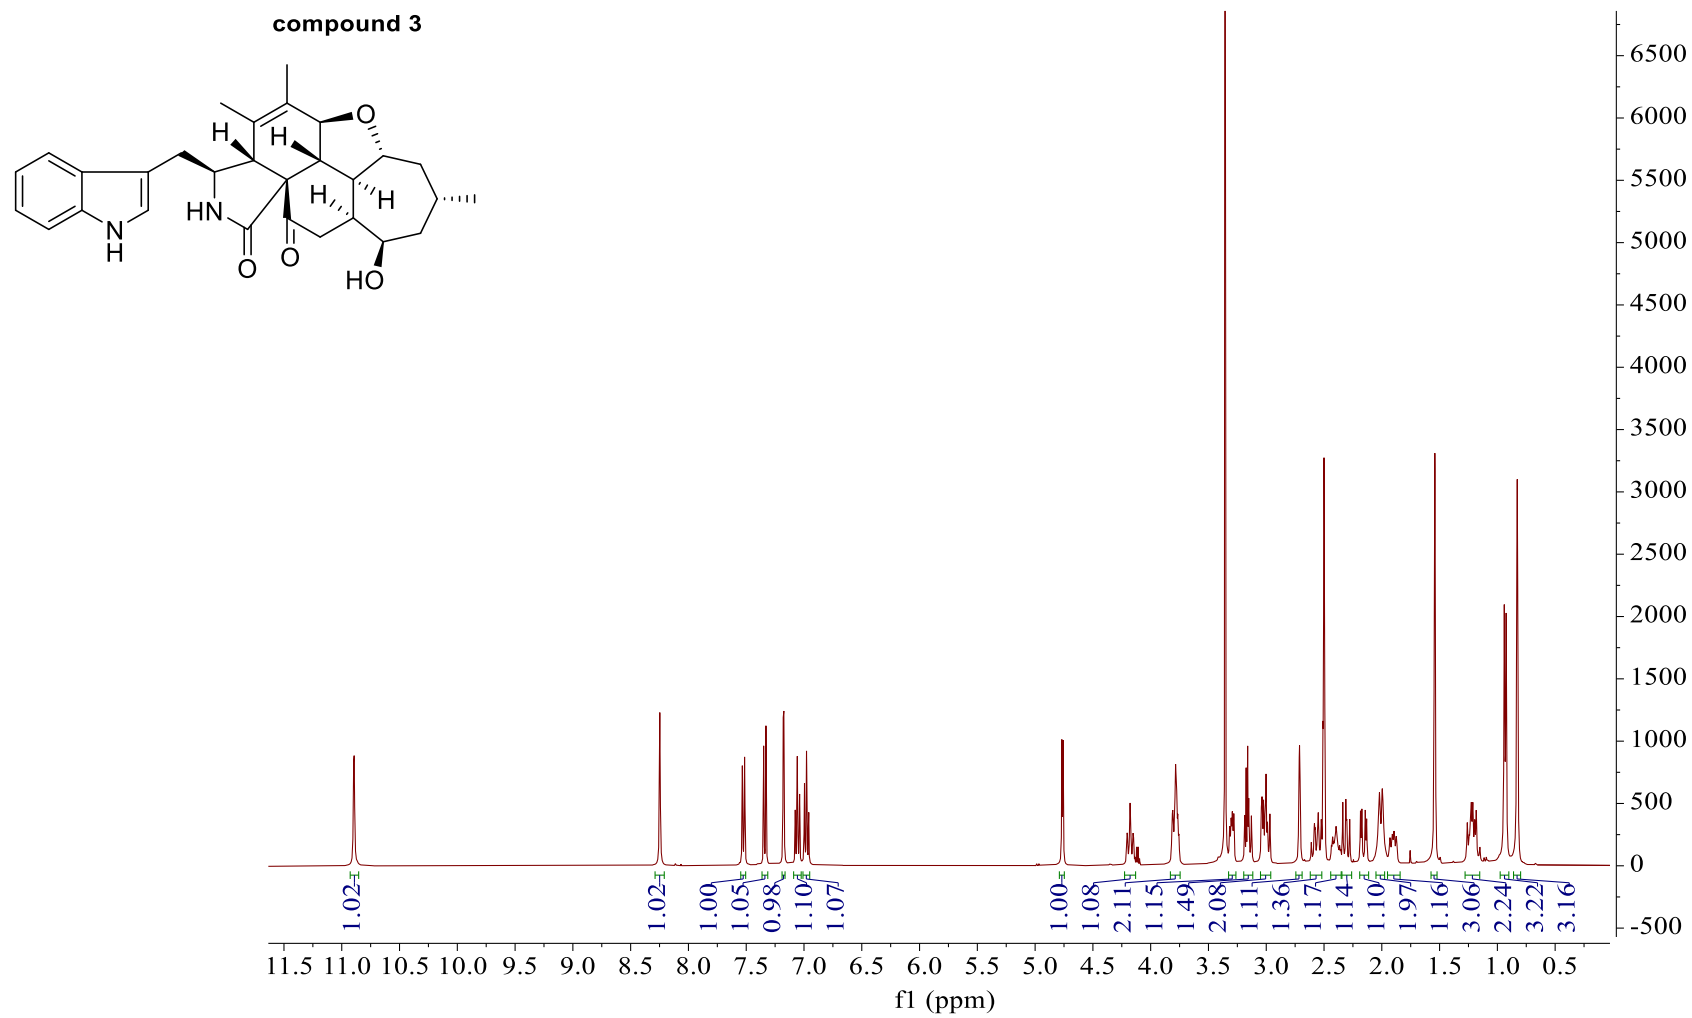



**Fig. S29.** Enlarged  $^1\text{H}$  NMR (400 MHz,  $\text{DMSO-}d_6$ ) spectrum of **3**.

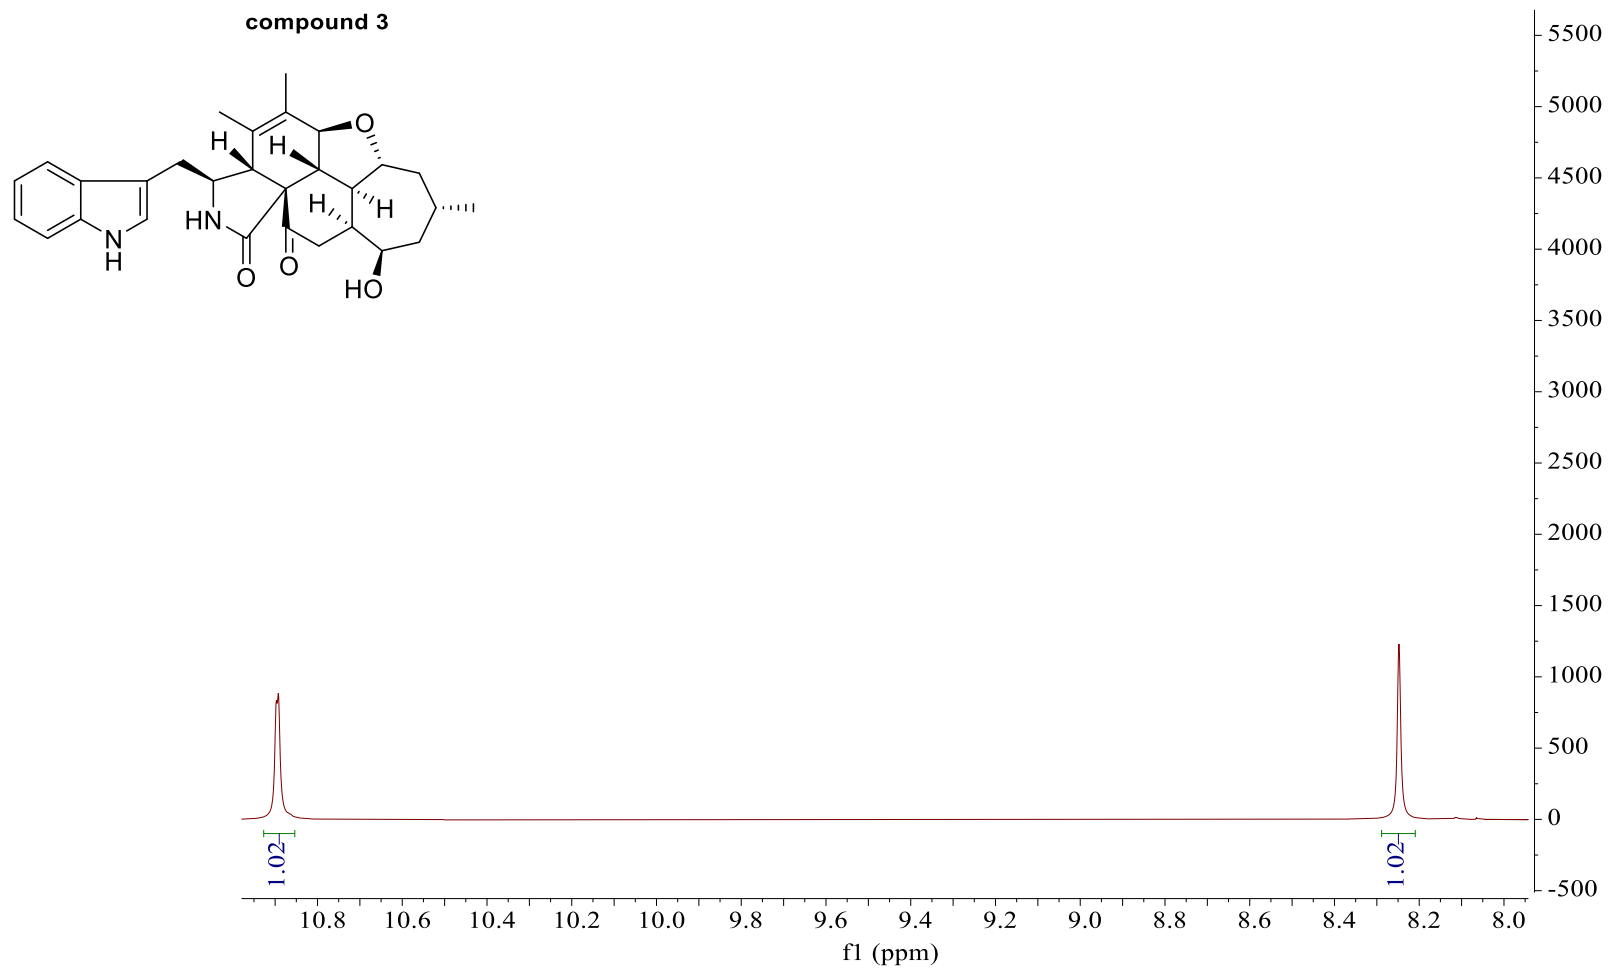

compound 3

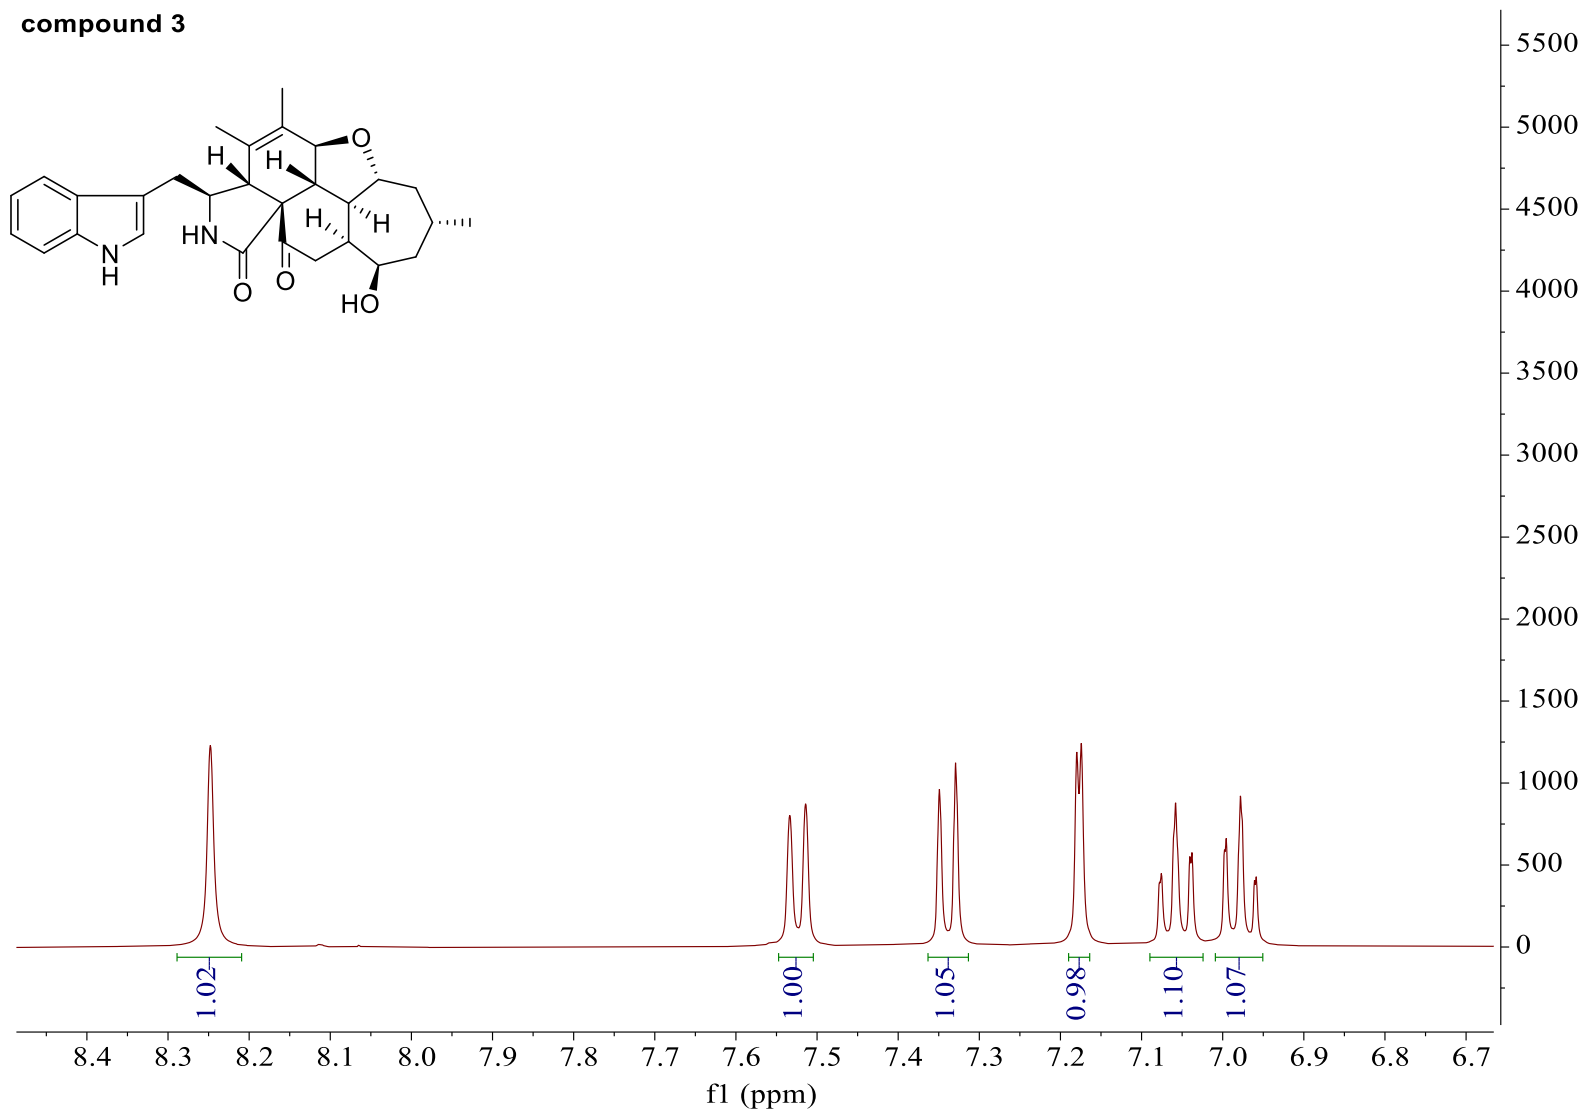

compound 3

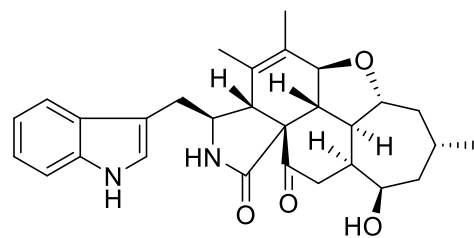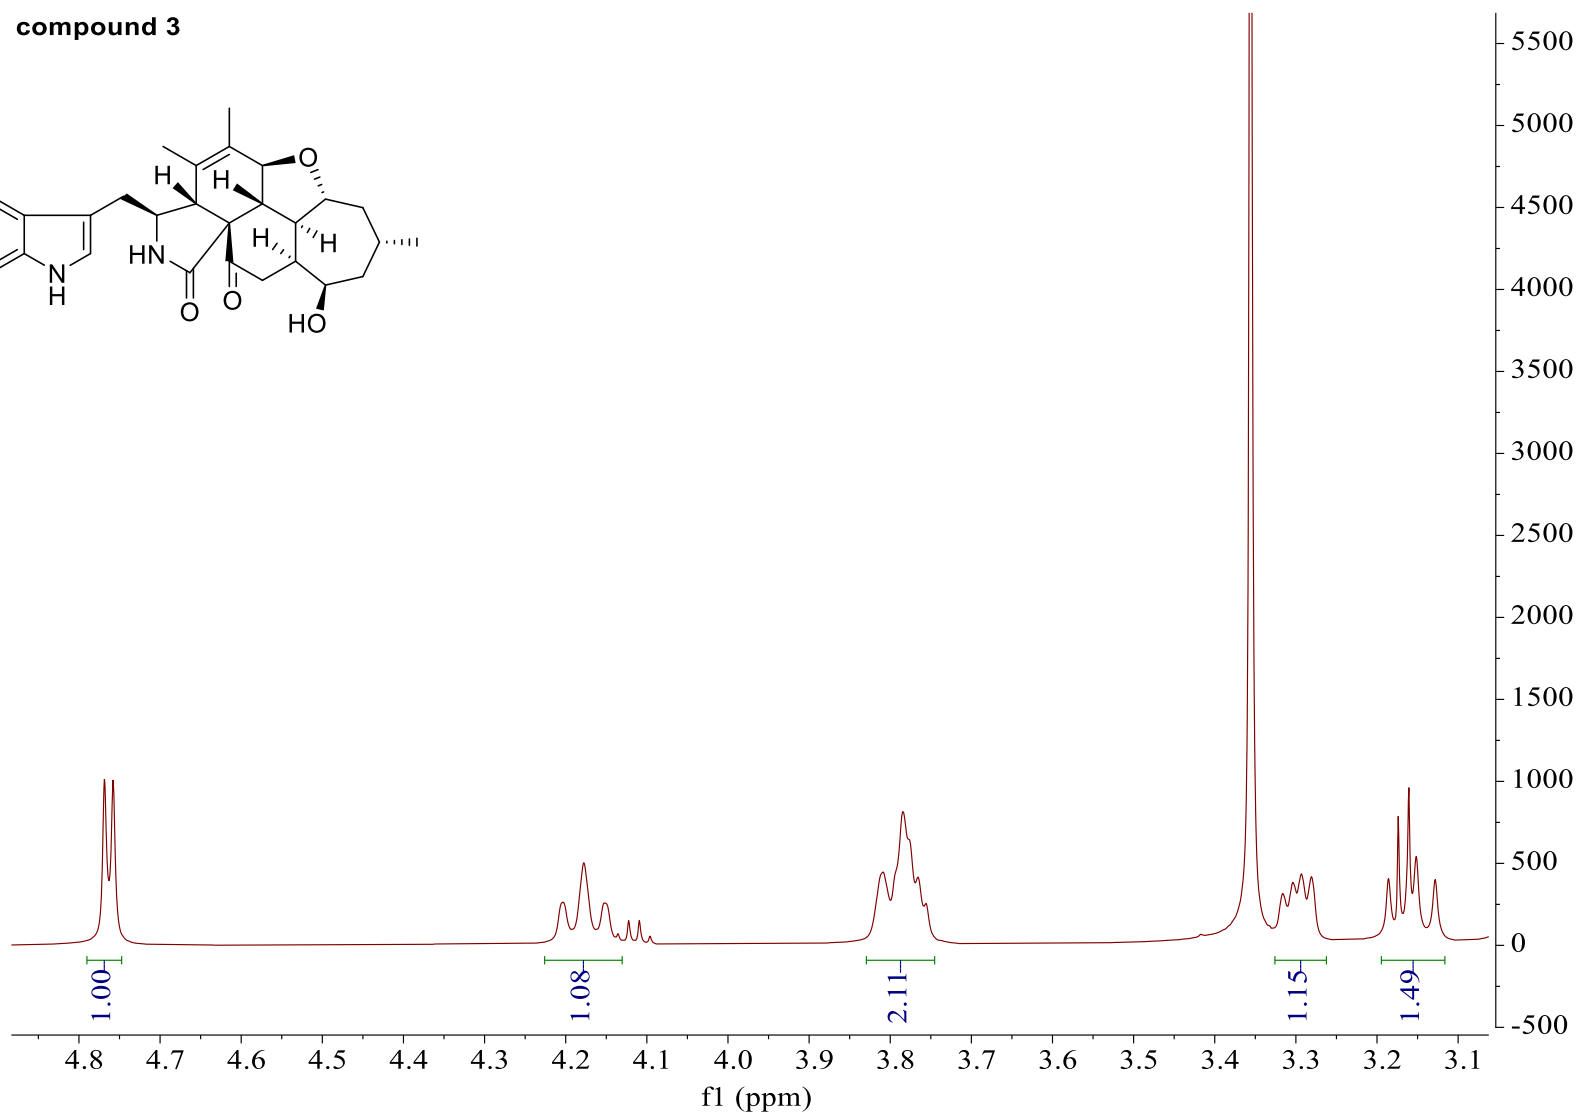

compound 3

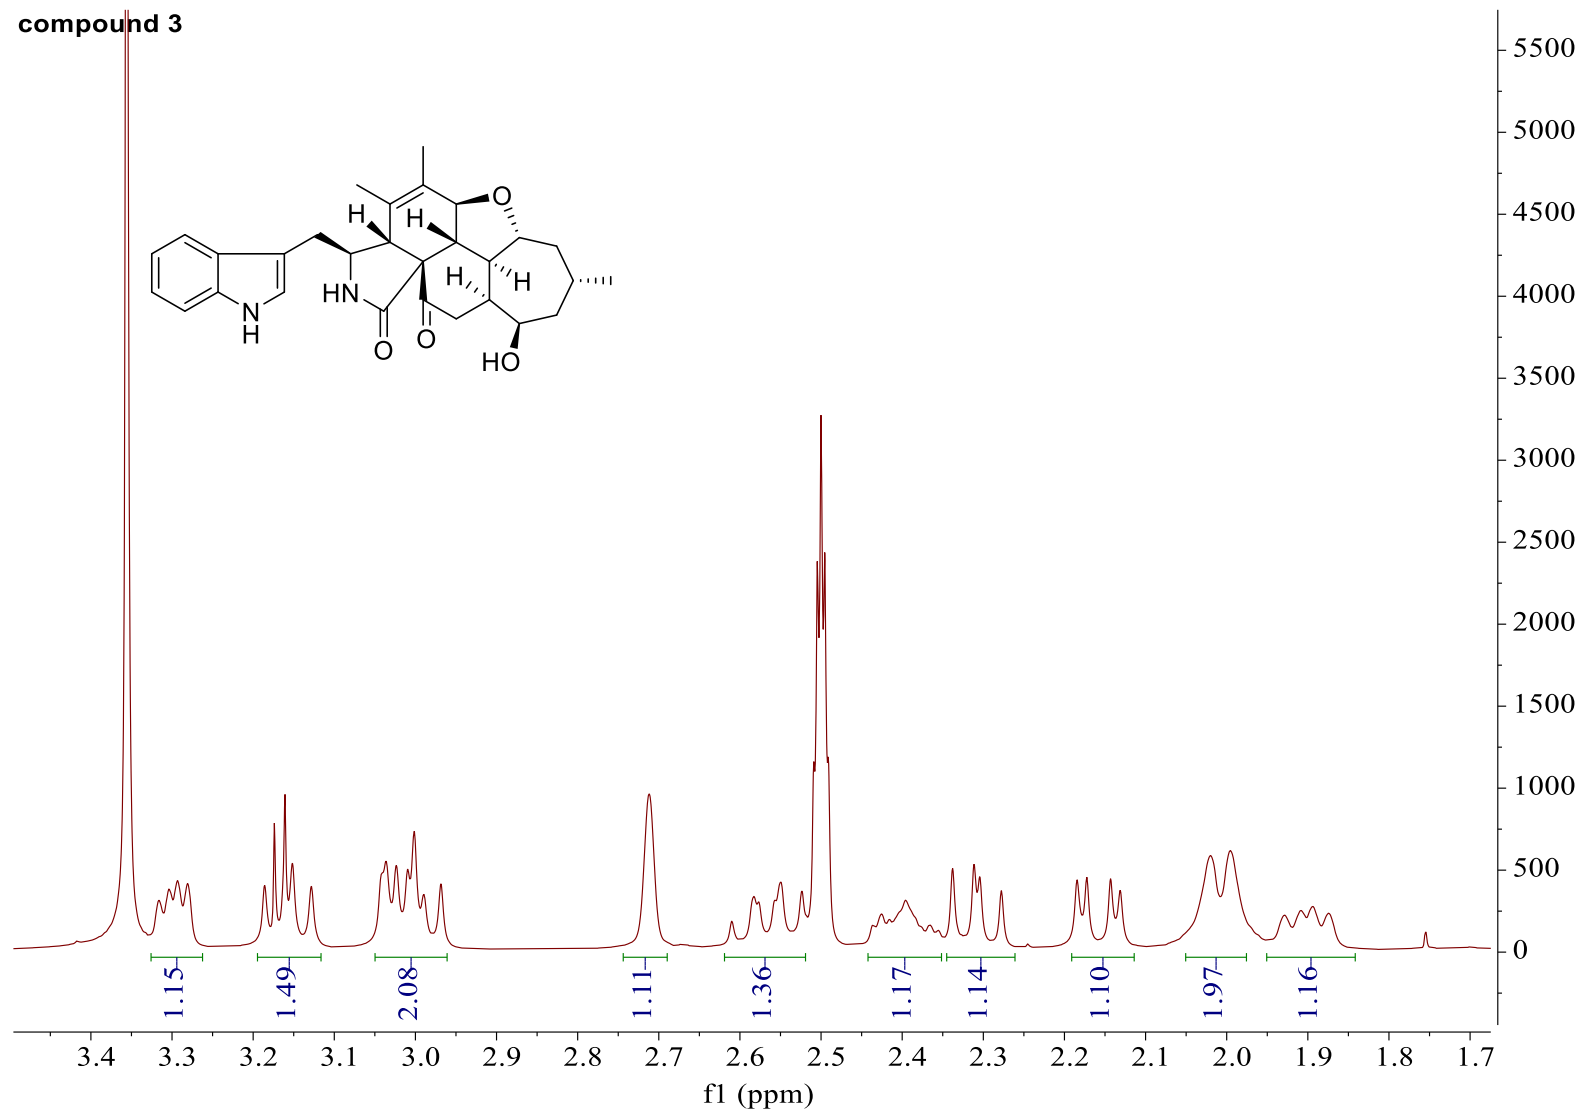

compound 3

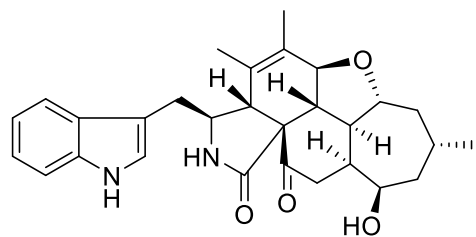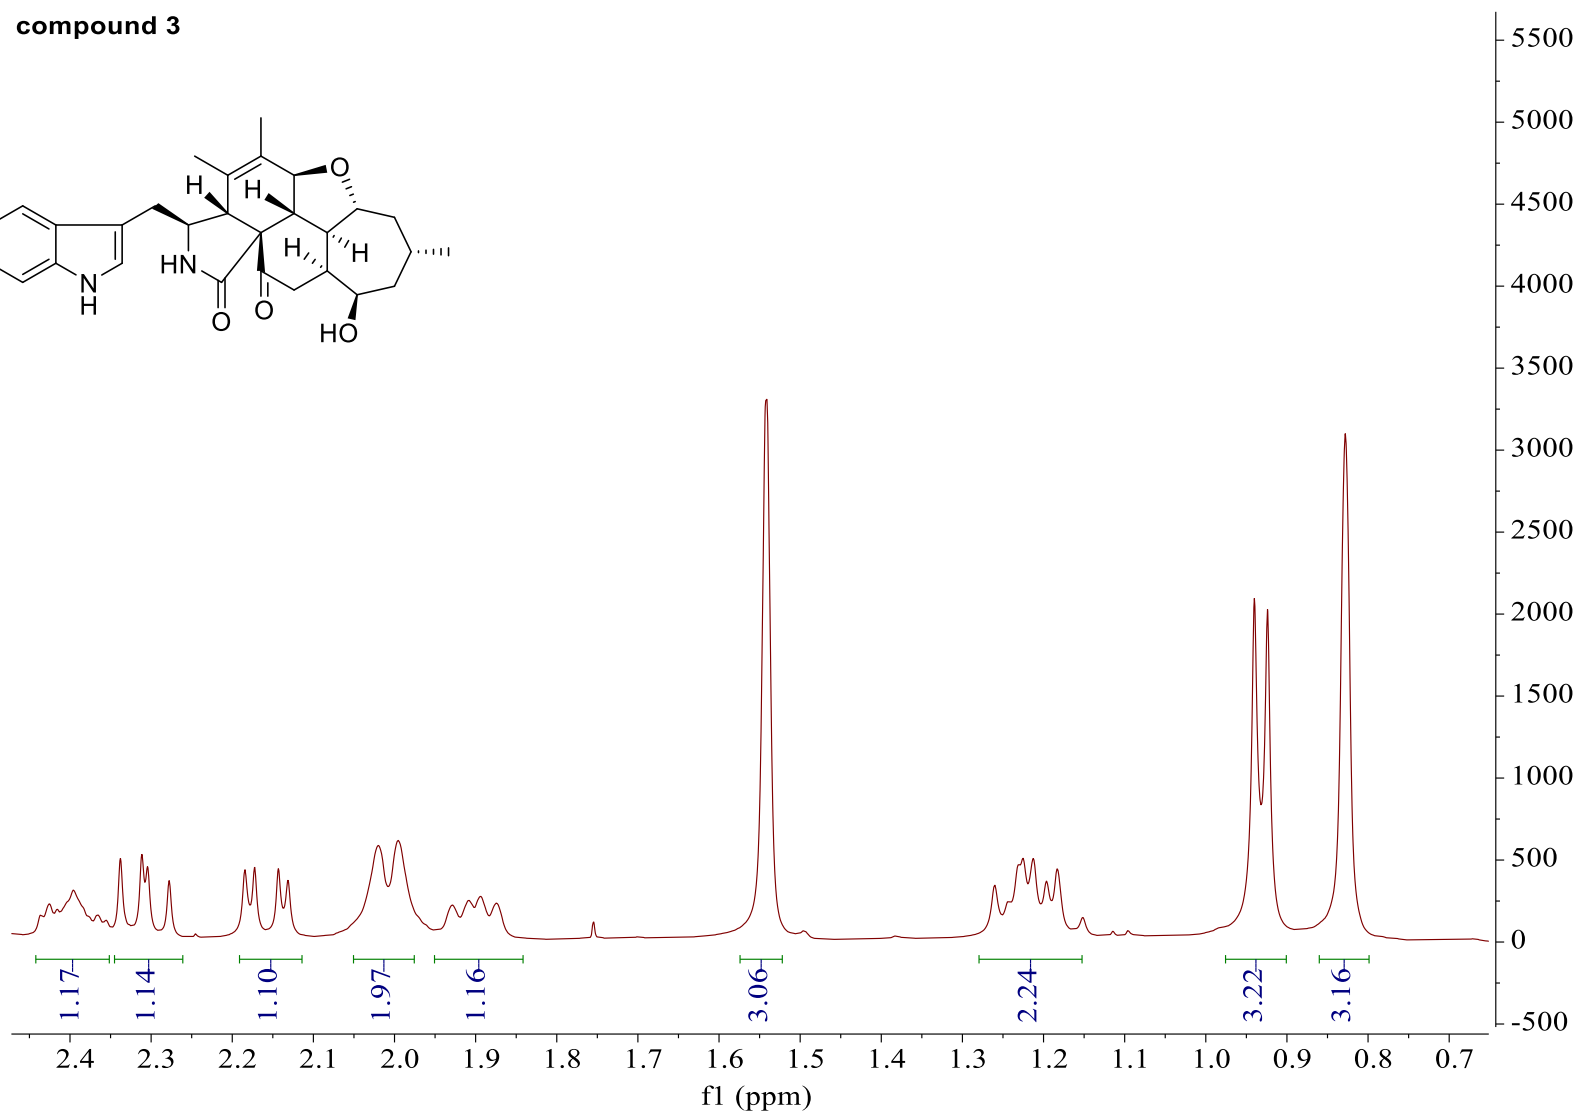

Fig. S30.  $^{13}\text{C}$  NMR (100 MHz,  $\text{DMSO-}d_6$ ) spectrum of **3**.

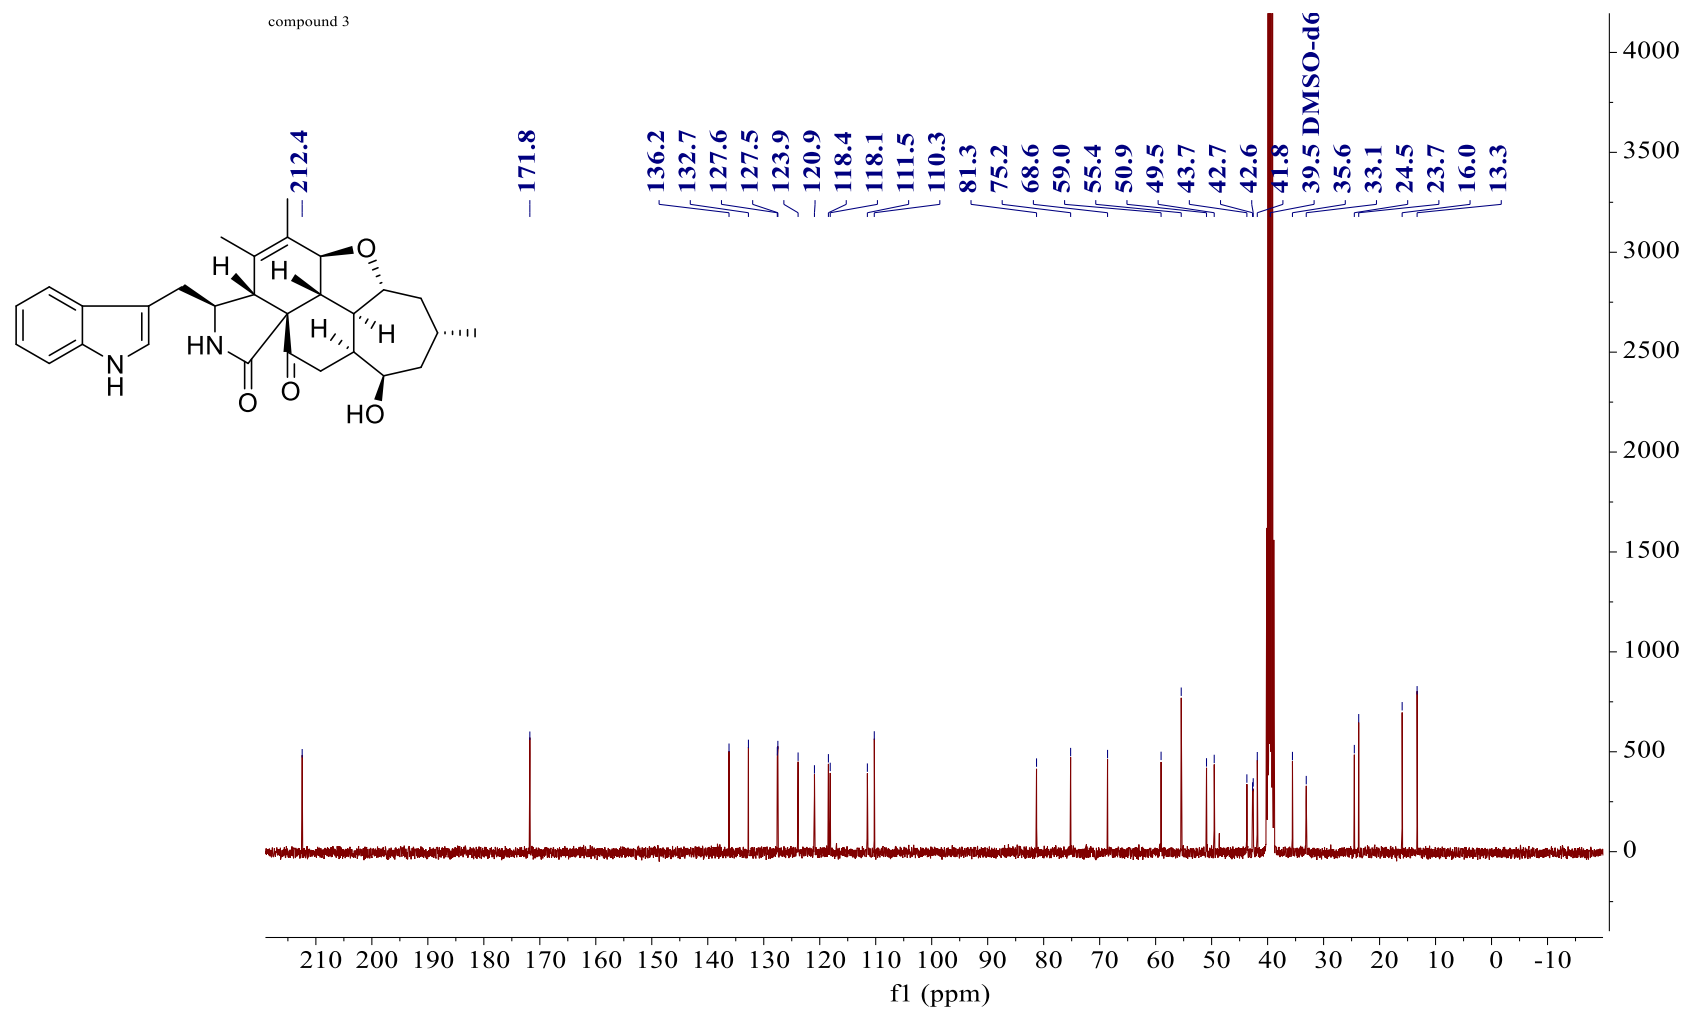

Fig. S31. DEPT-135 (100 MHz, DMSO-*d*<sub>6</sub>) spectrum of **3**.

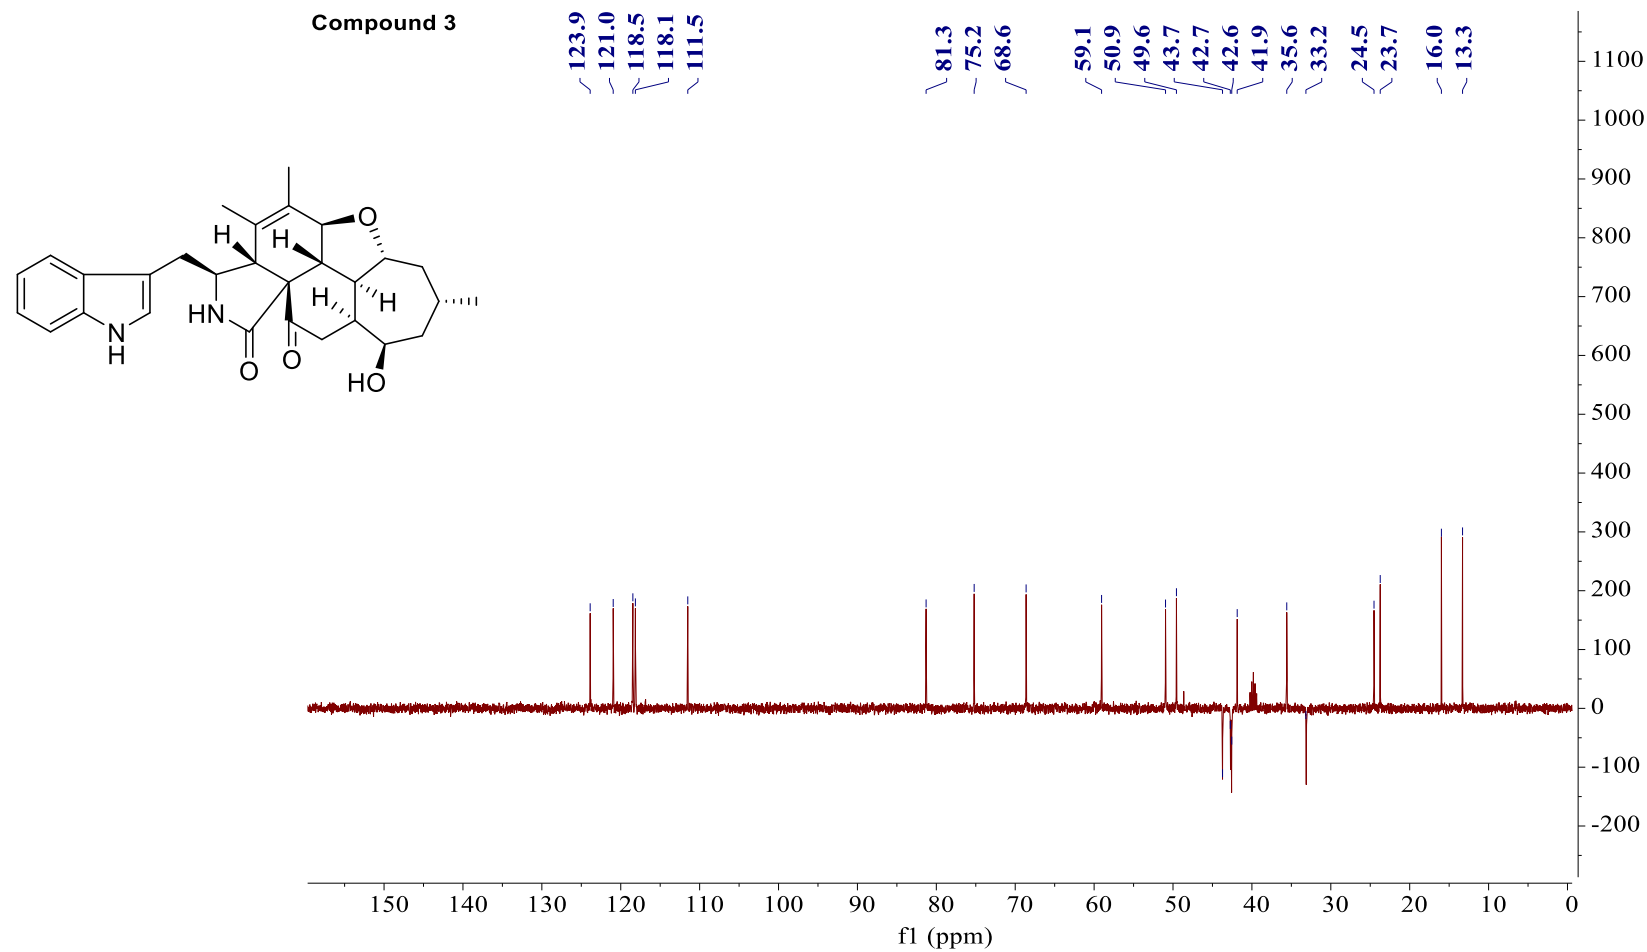

Fig. S32. HSQC spectrum of 3 in DMSO-*d*<sub>6</sub>.

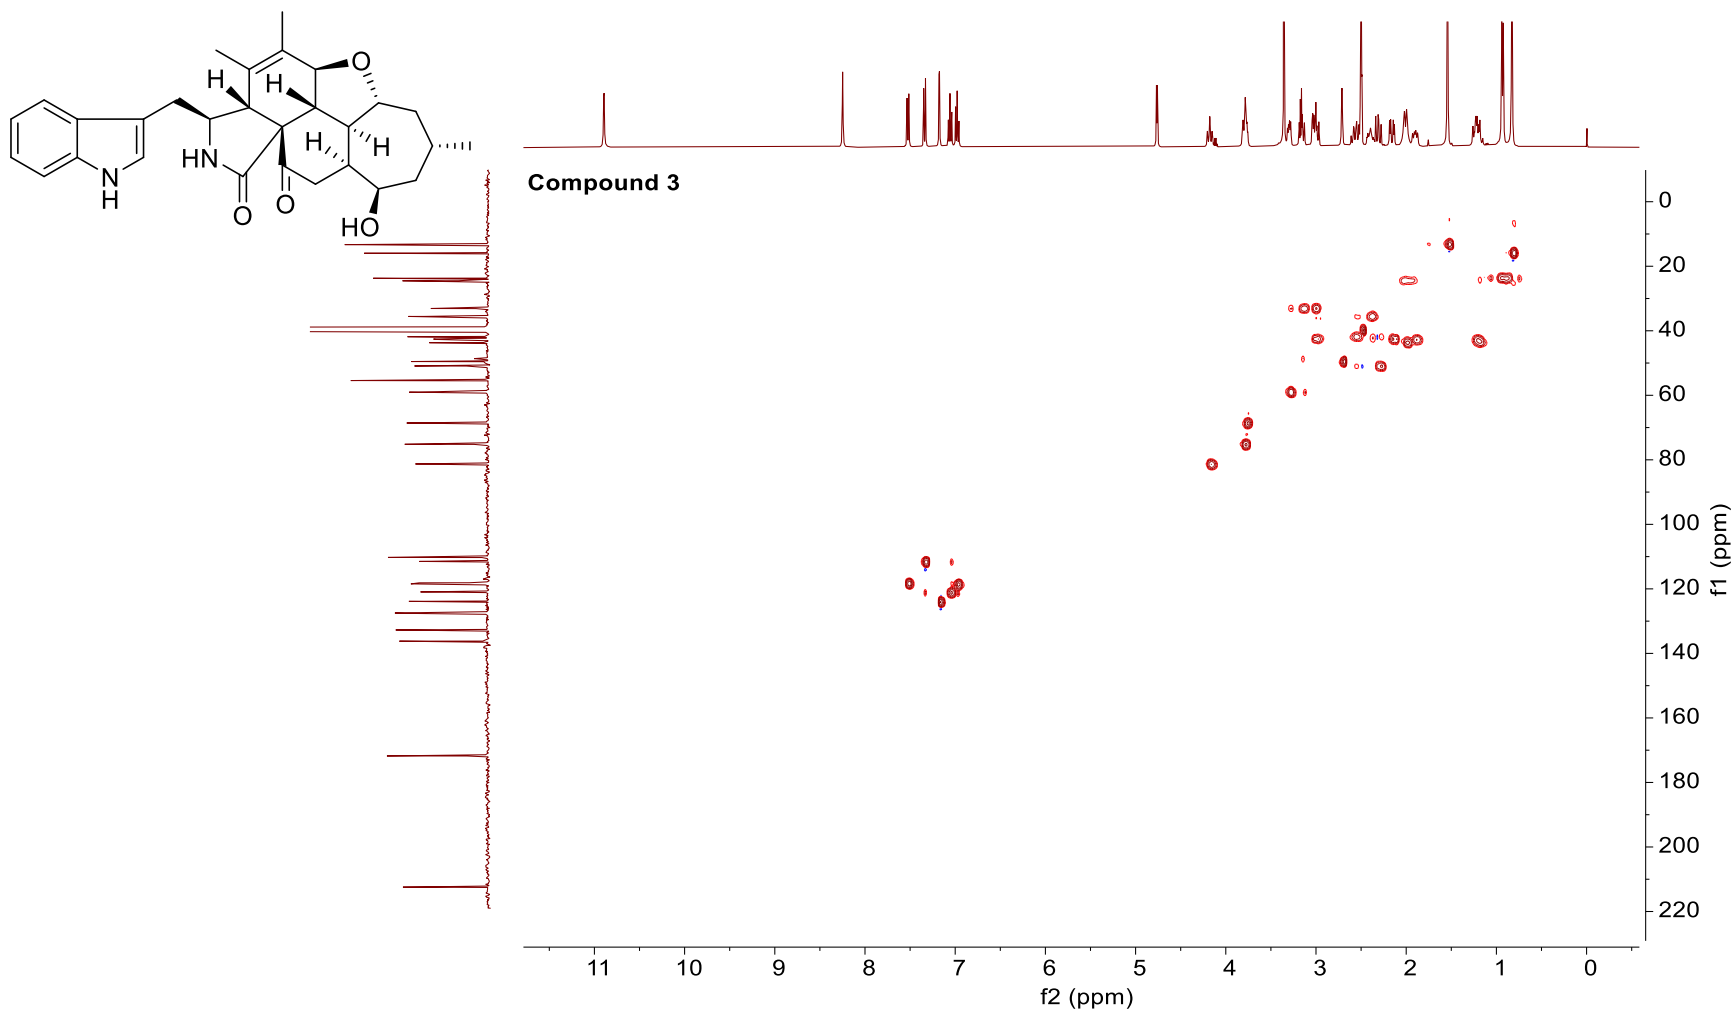



Fig. S33. HMBC spectrum of **3** in DMSO-*d*<sub>6</sub>.

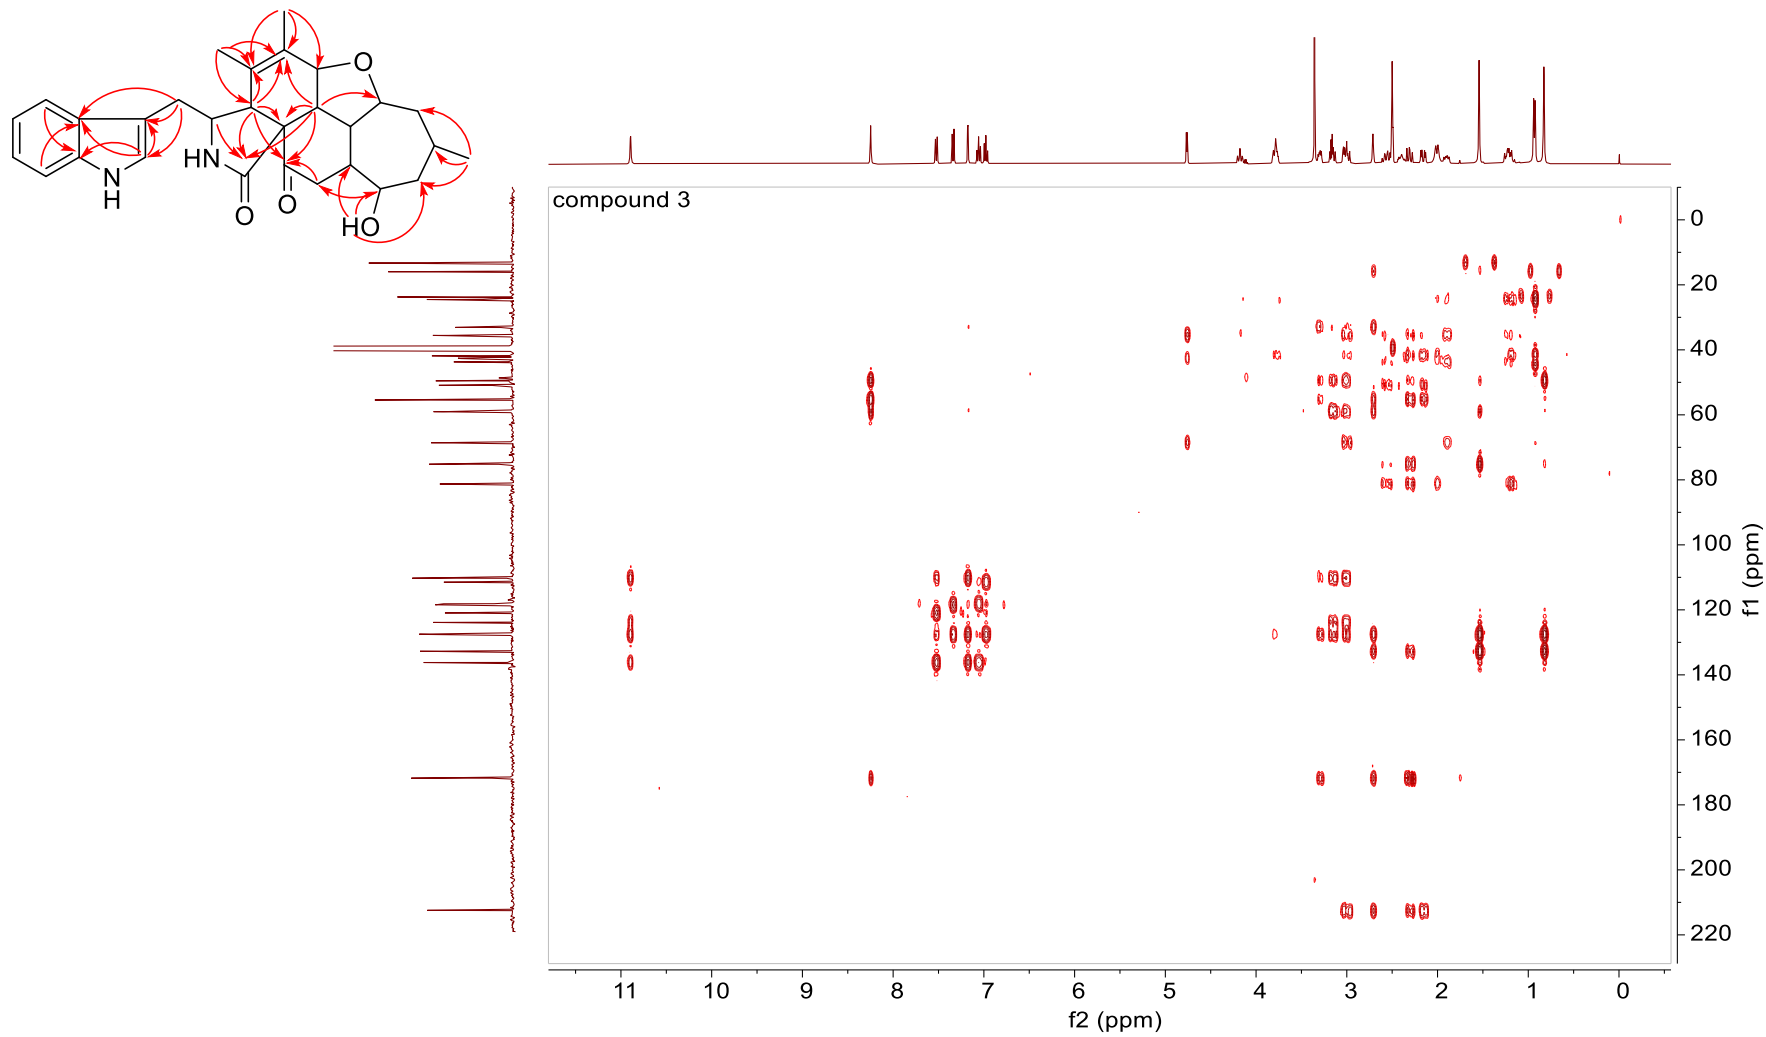

Fig. S34.  $^1\text{H}$ - $^1\text{H}$  COSY spectrum of **3** in  $\text{DMSO-}d_6$ .

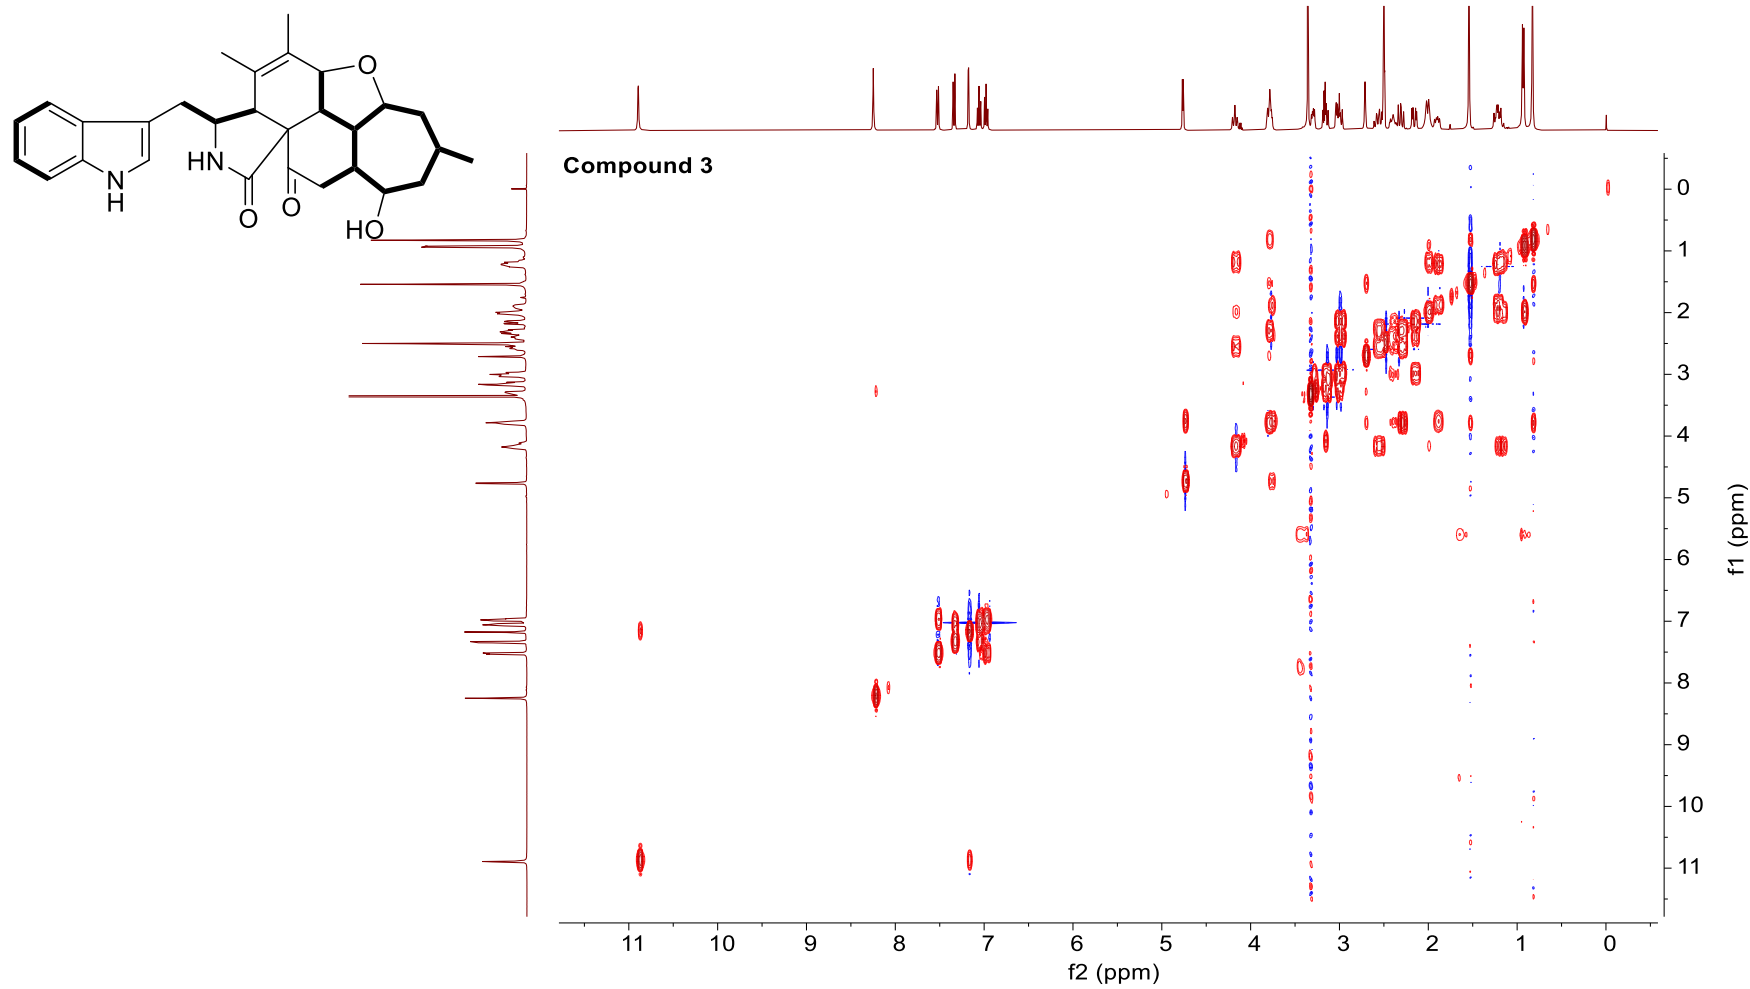

Fig. S35. NOESY spectrum of **3** in DMSO-*d*<sub>6</sub>.

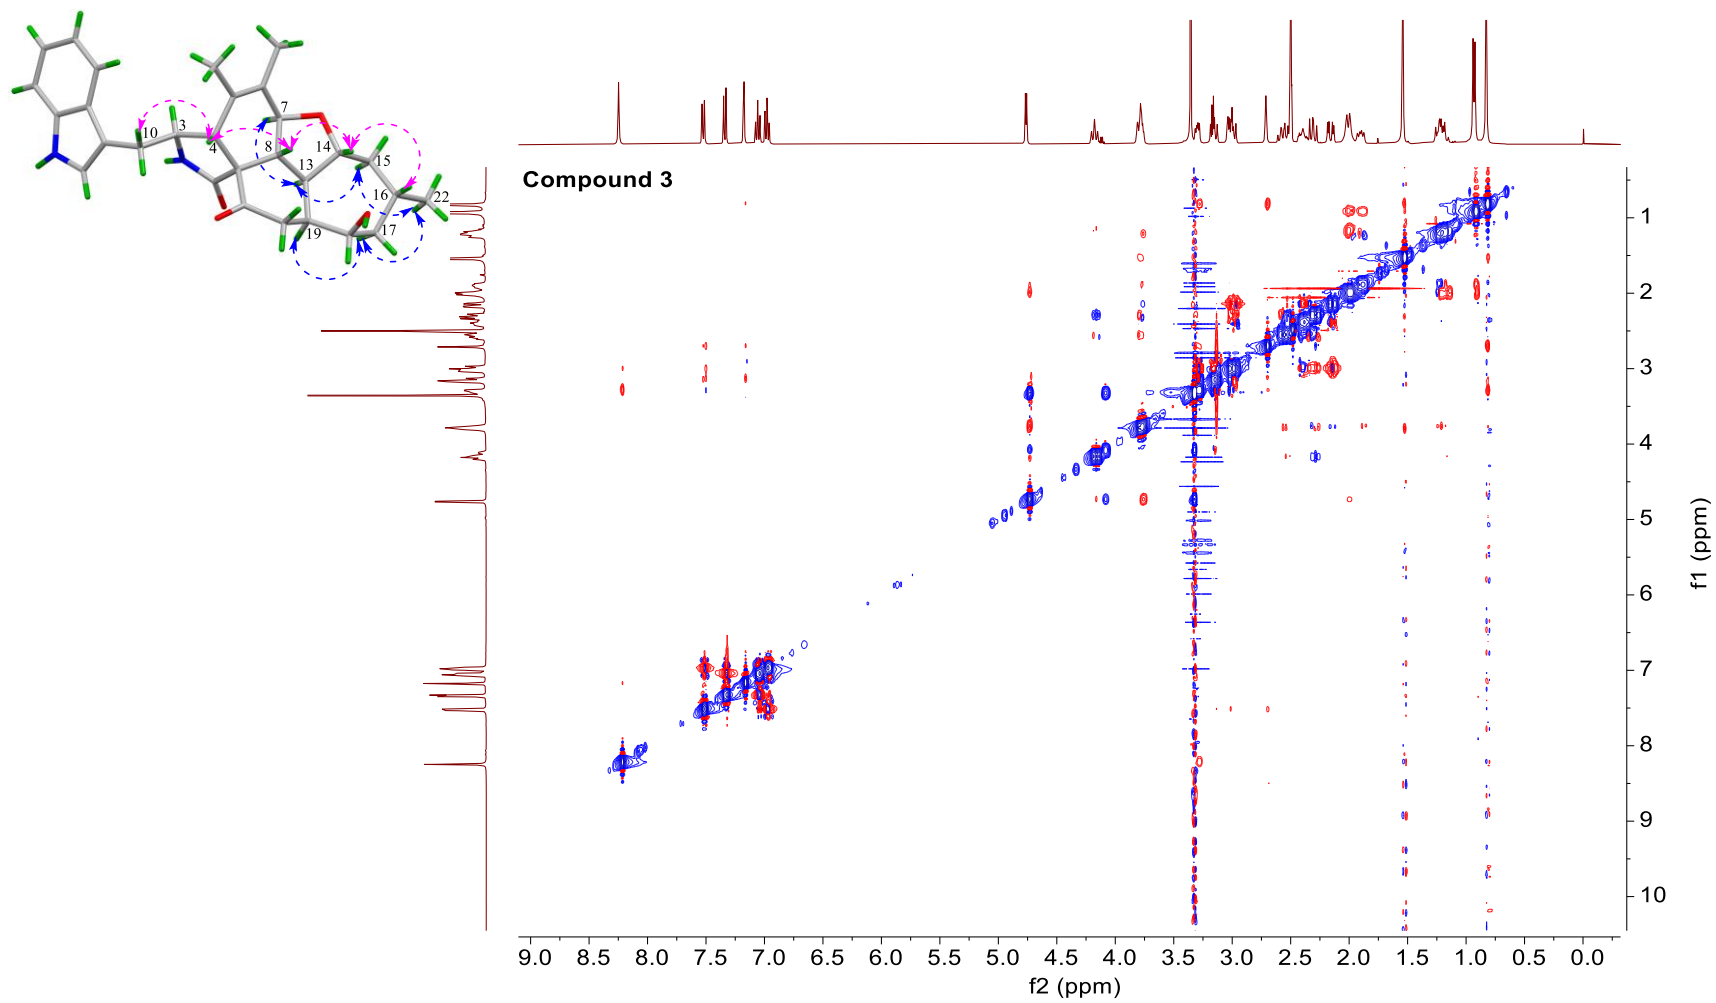

Fig. S36.  $^1\text{H}$  NMR (400 MHz,  $\text{CD}_3\text{OD}$ ) spectrum of **3**.

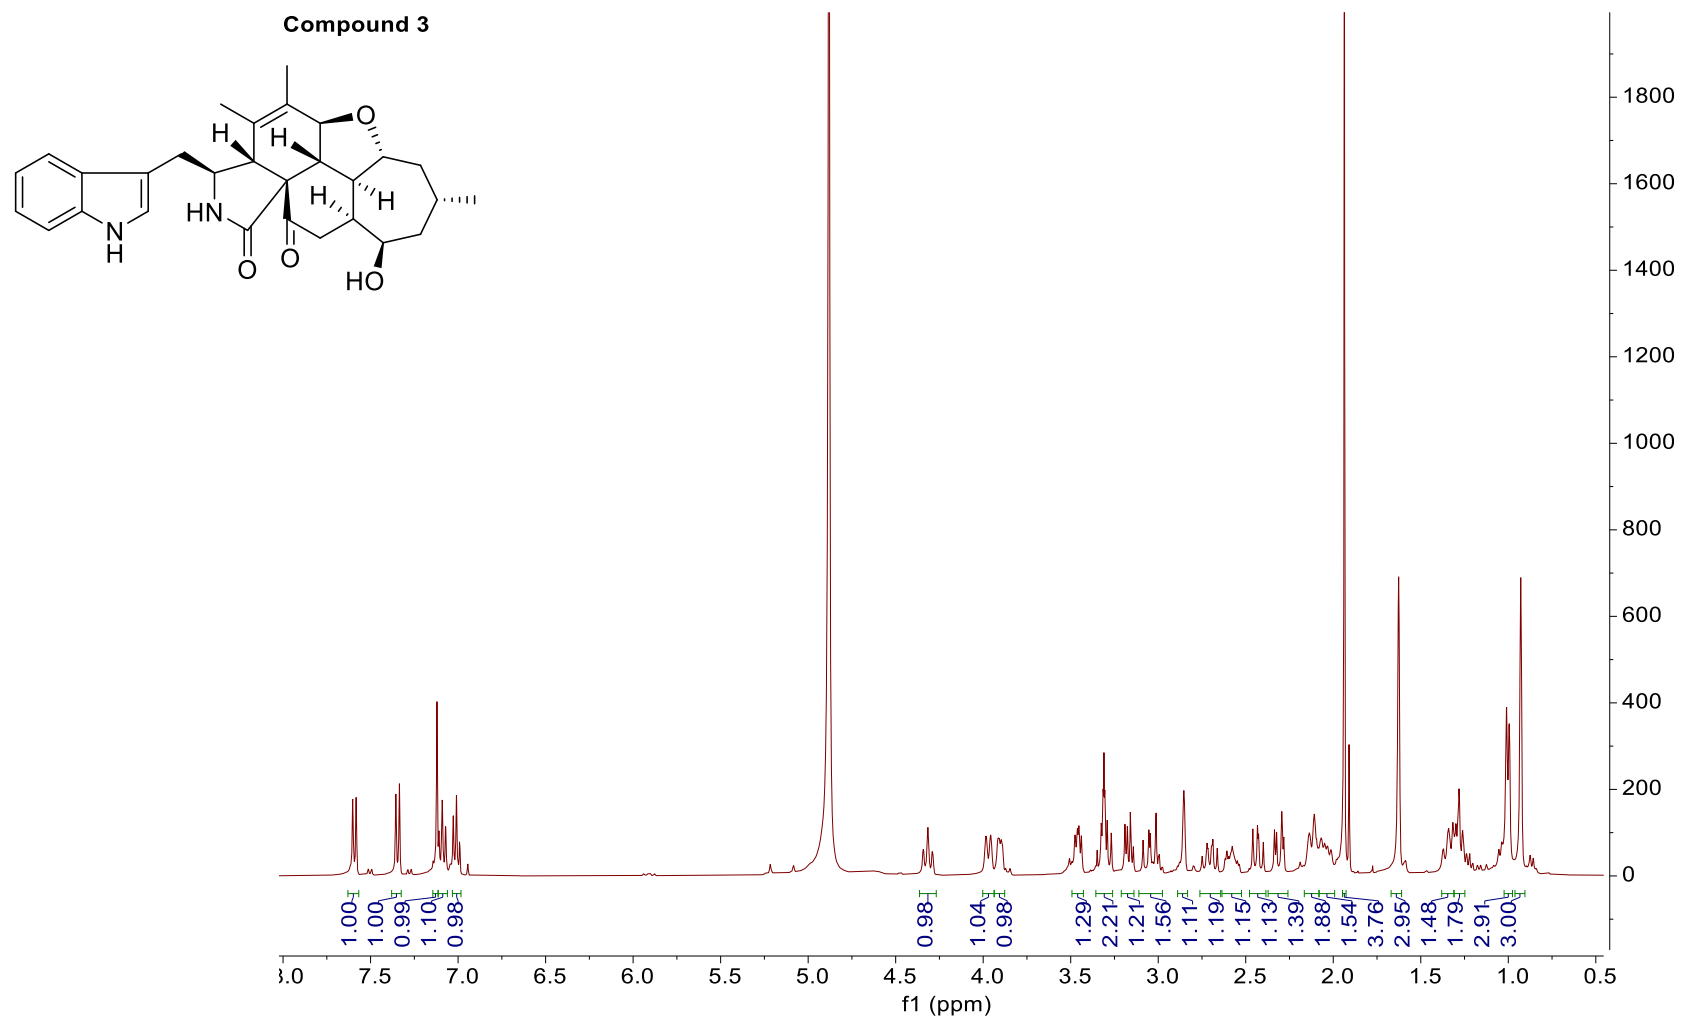

Fig. S37.  $^{13}\text{C}$  NMR (100 MHz,  $\text{CD}_3\text{OD}$ ) spectrum of **3**.

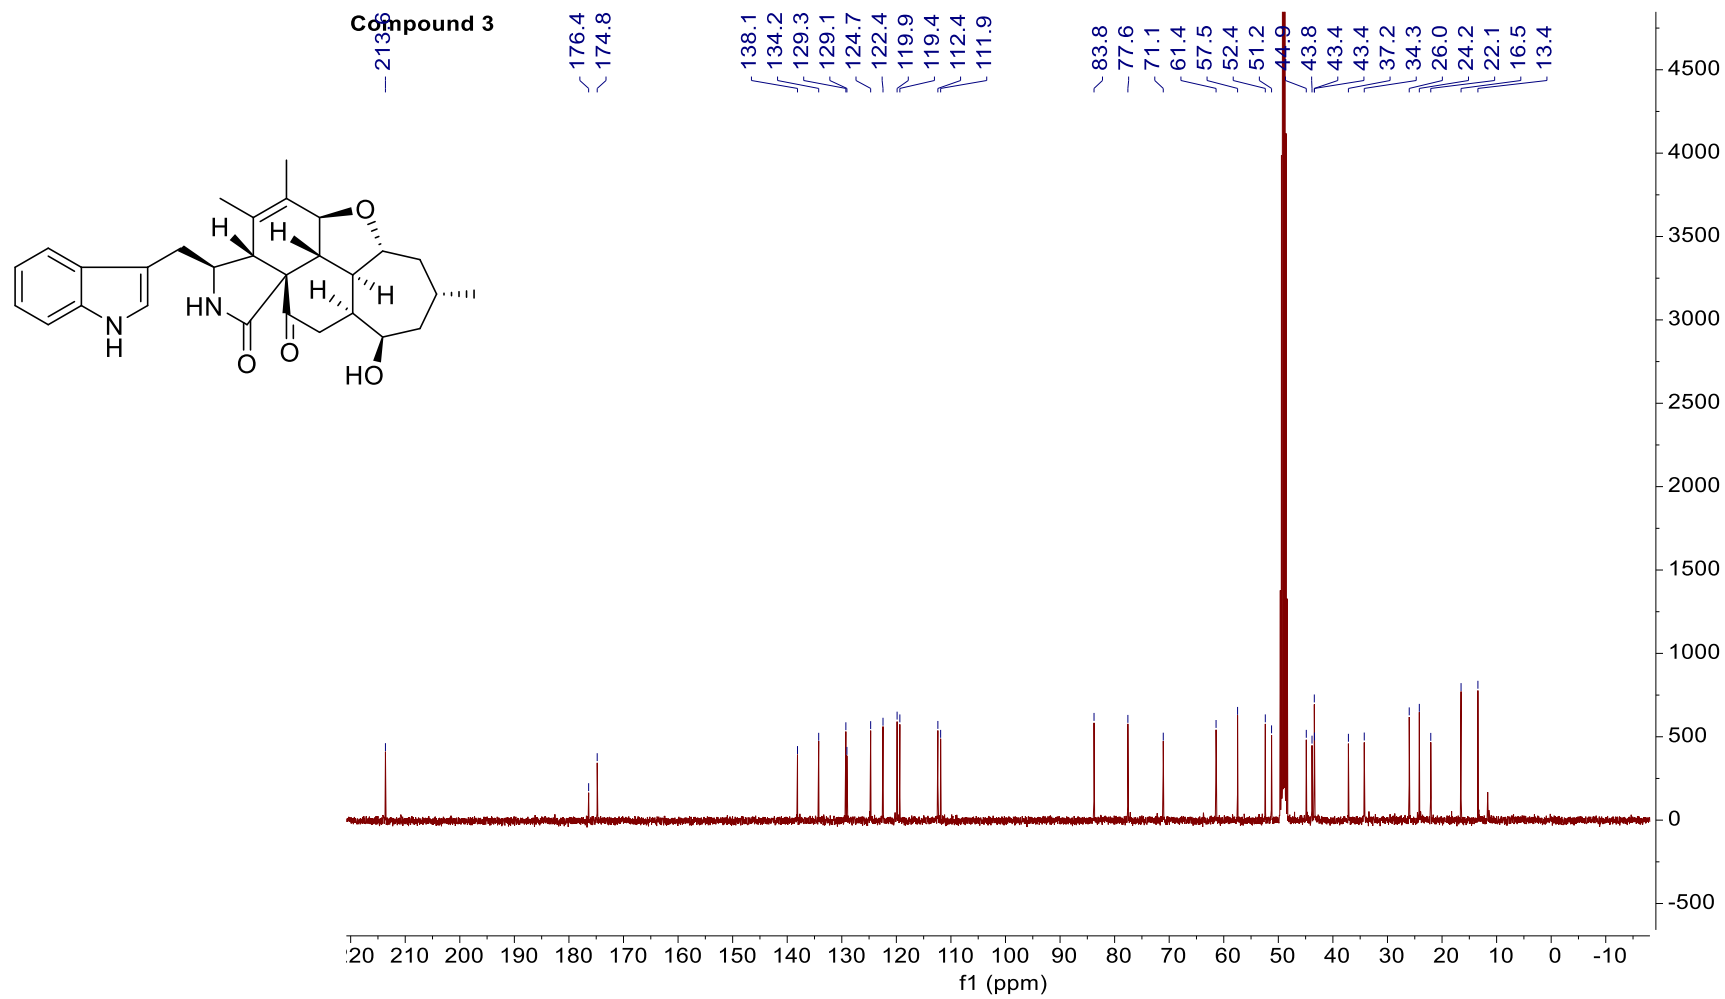

Fig. S38. DEPT-135 (100 MHz, CD<sub>3</sub>OD) spectrum of **3**.

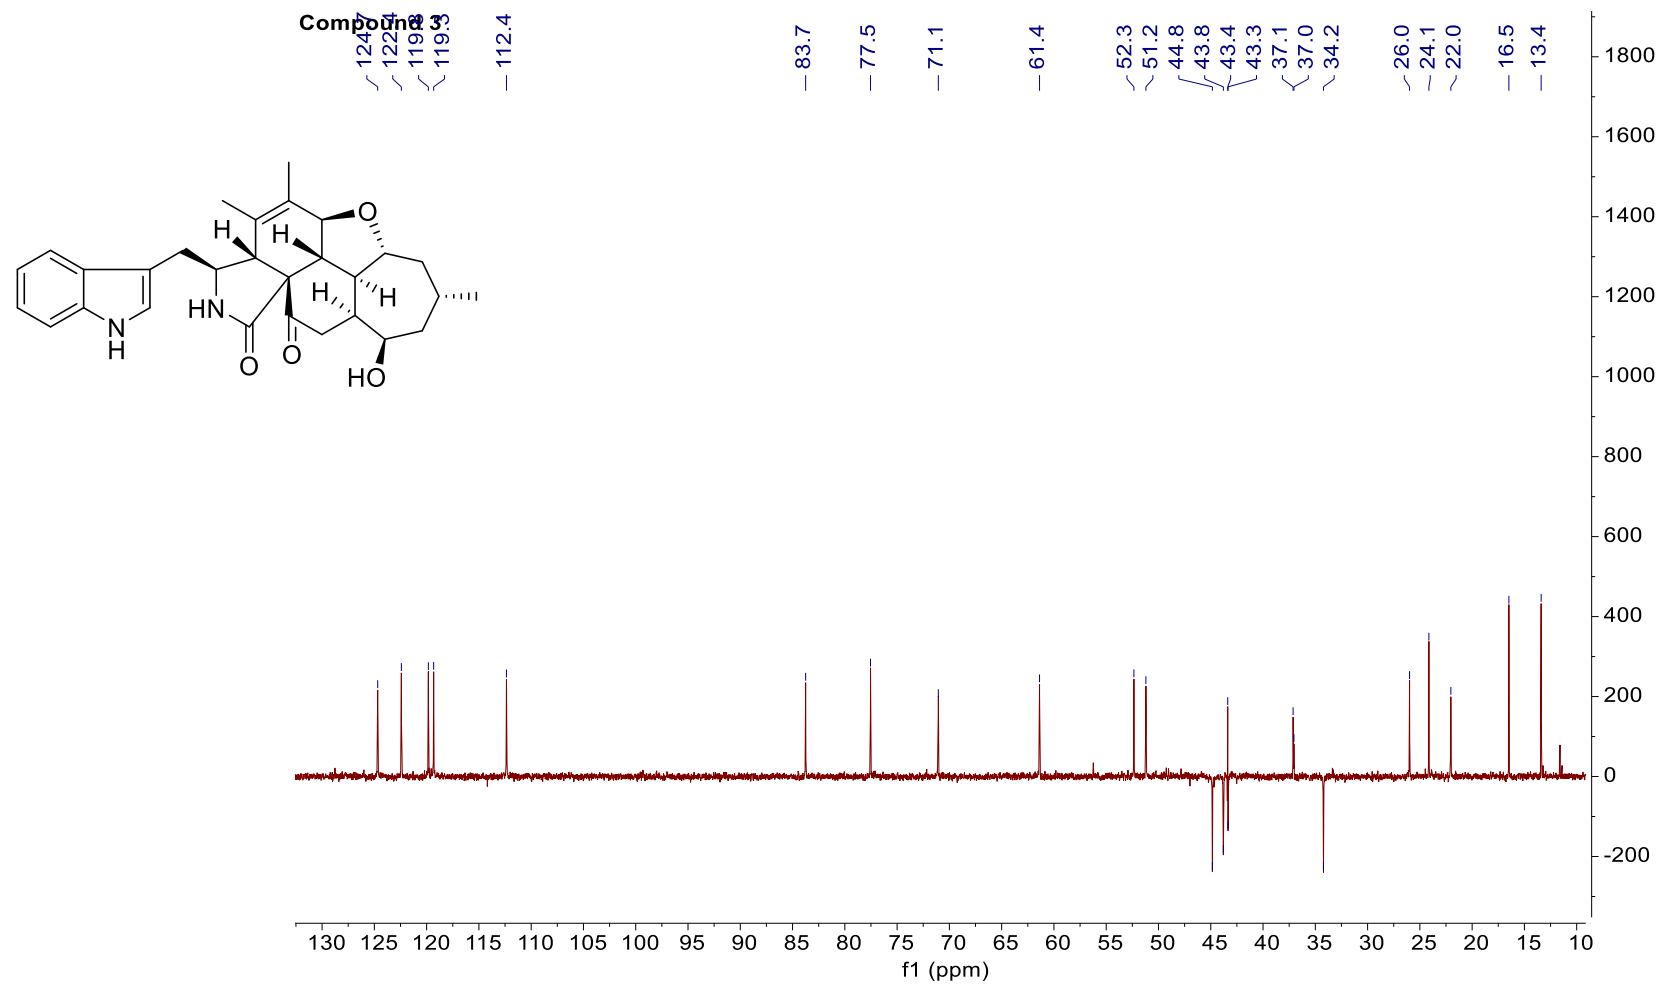

Fig. S39. HSQC spectrum of **3** in CD<sub>3</sub>OD.

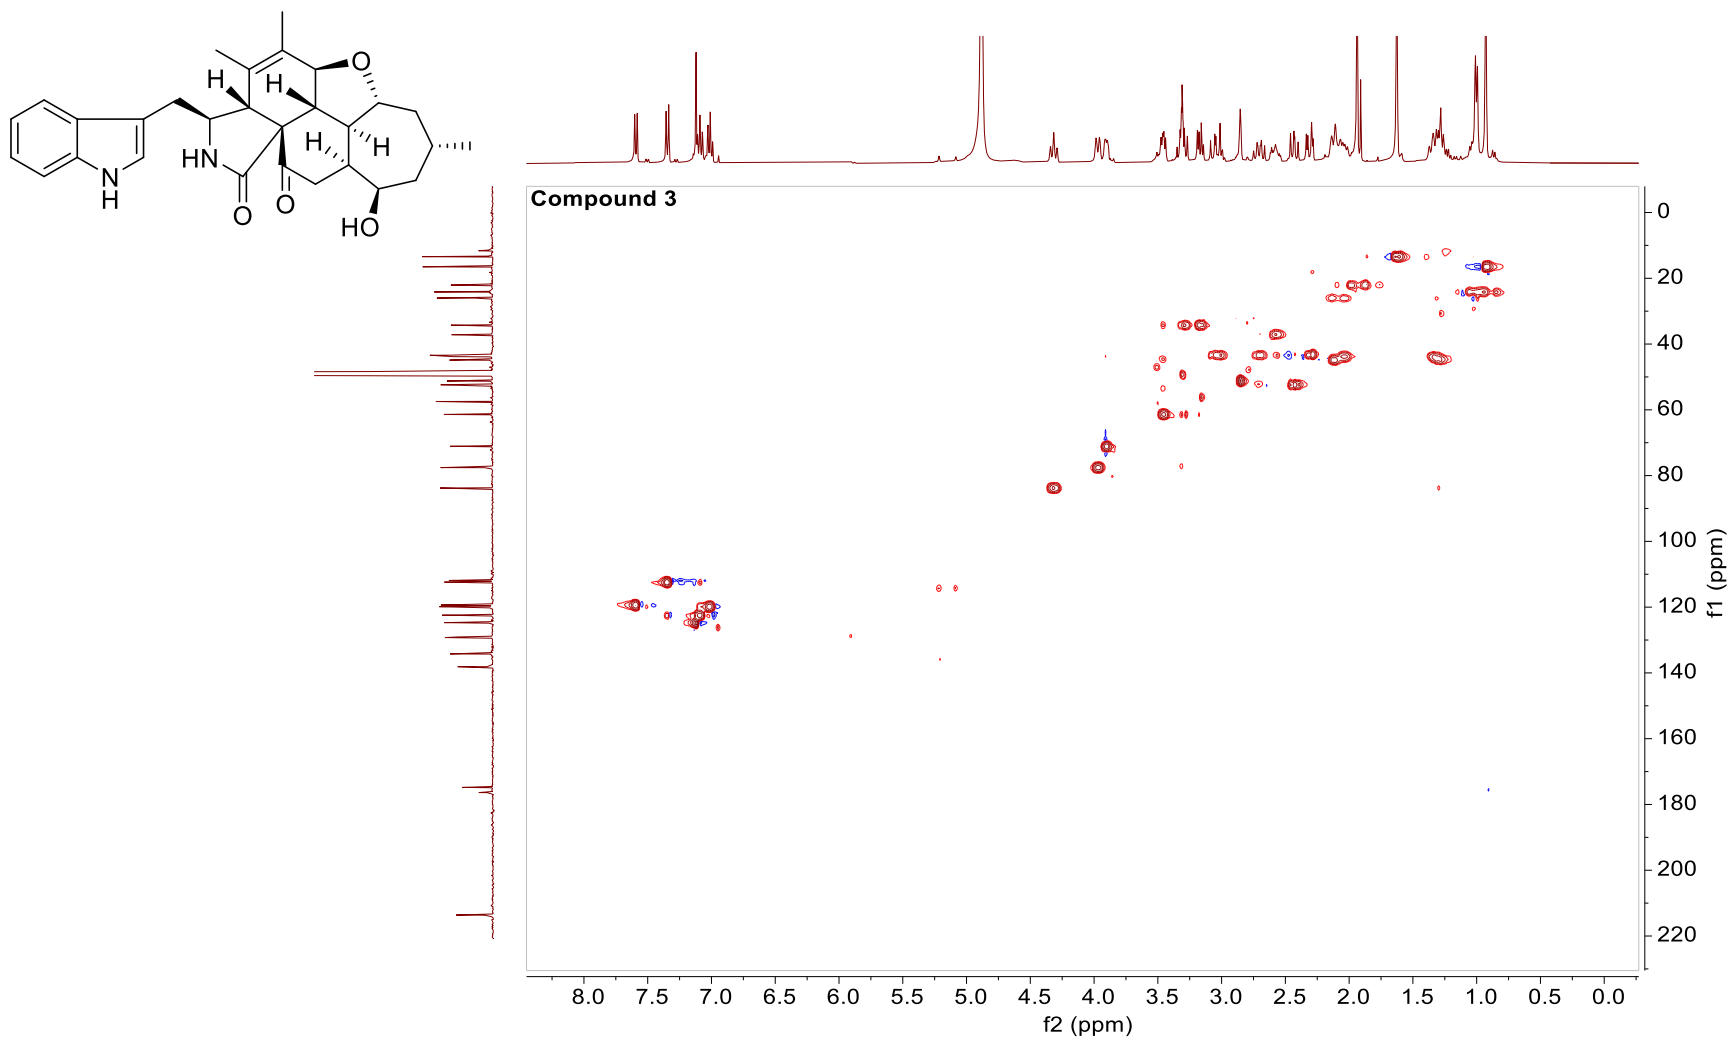

Fig. S40. HMBC spectrum of **3** in CD<sub>3</sub>OD.

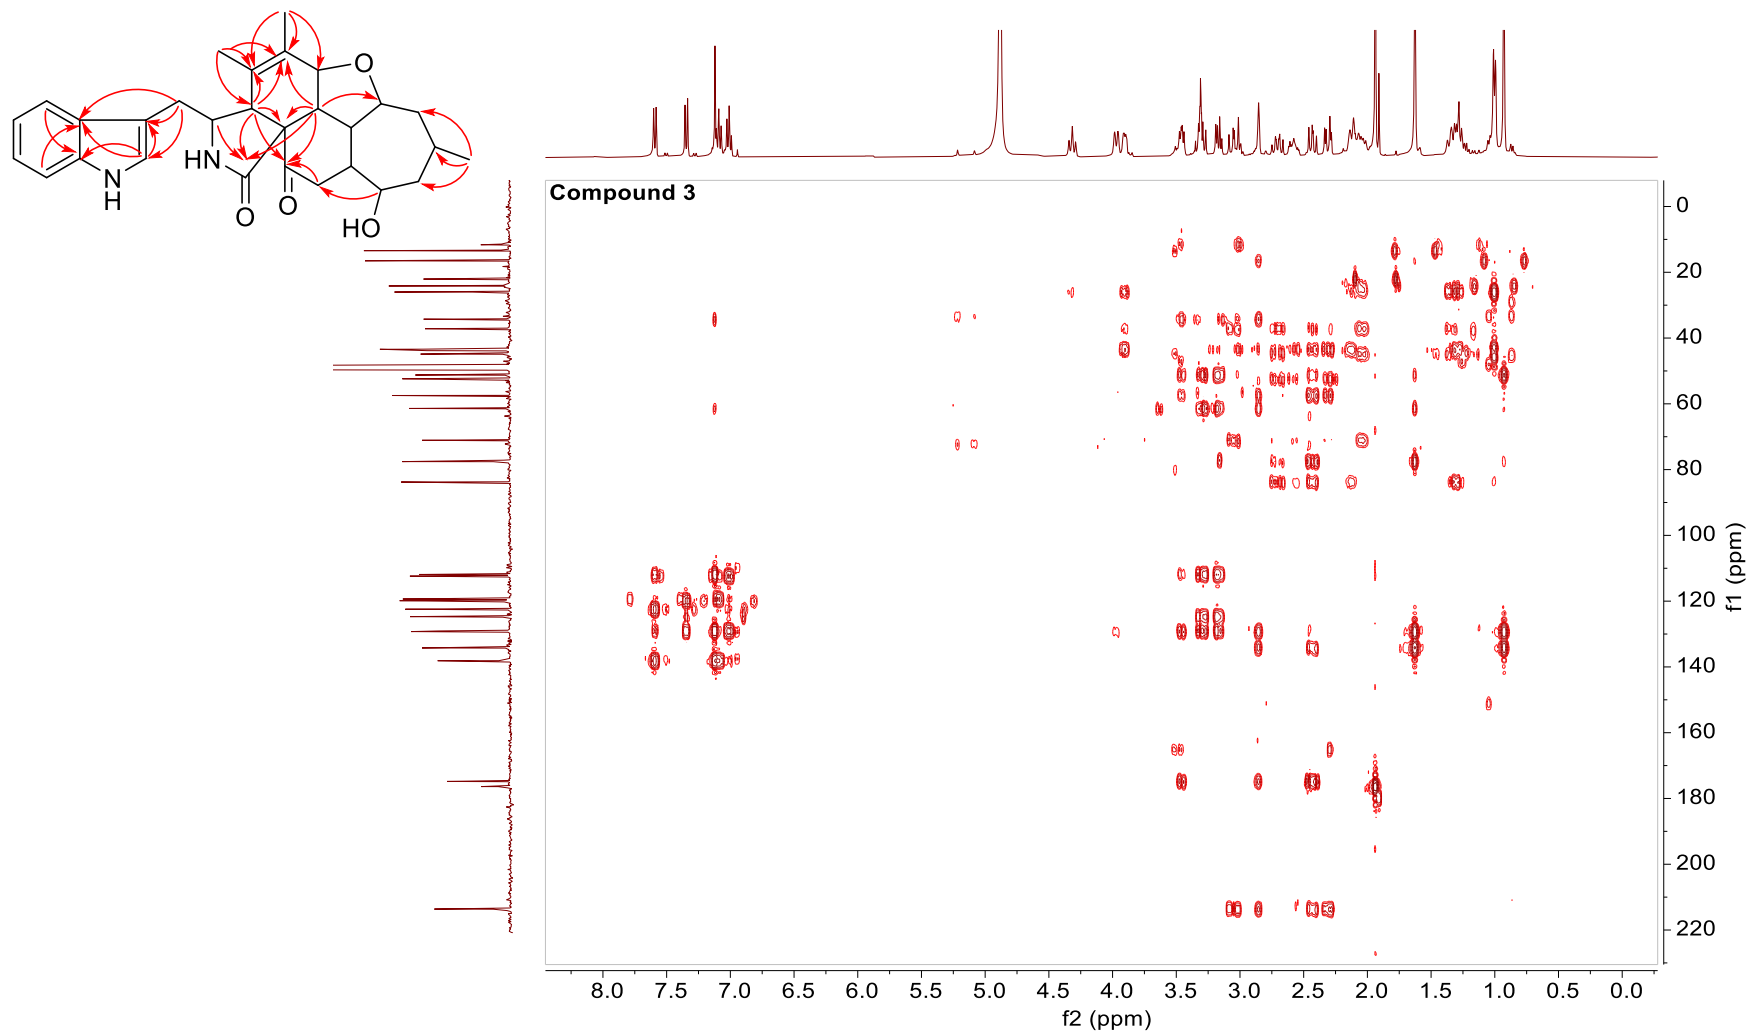



Fig. S41.  $^1\text{H}$ - $^1\text{H}$  COSY spectrum of **3** in  $\text{CD}_3\text{OD}$ .

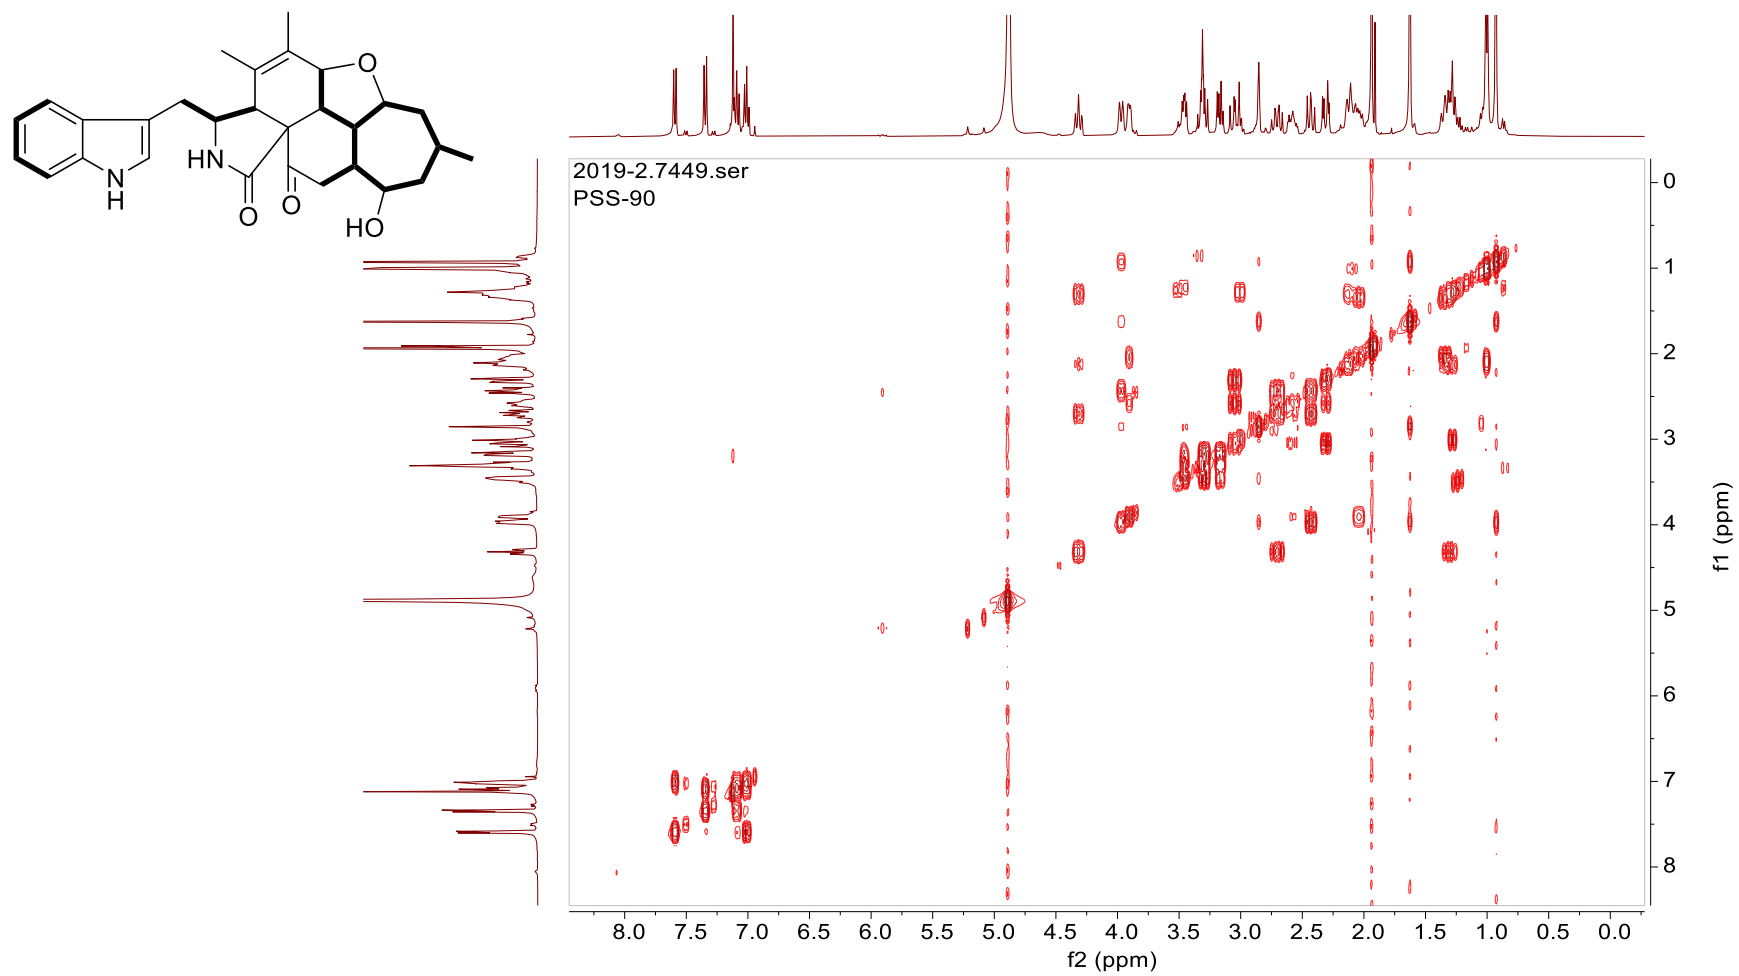

Fig. S42. NOESY spectrum of **3** in CD<sub>3</sub>OD.

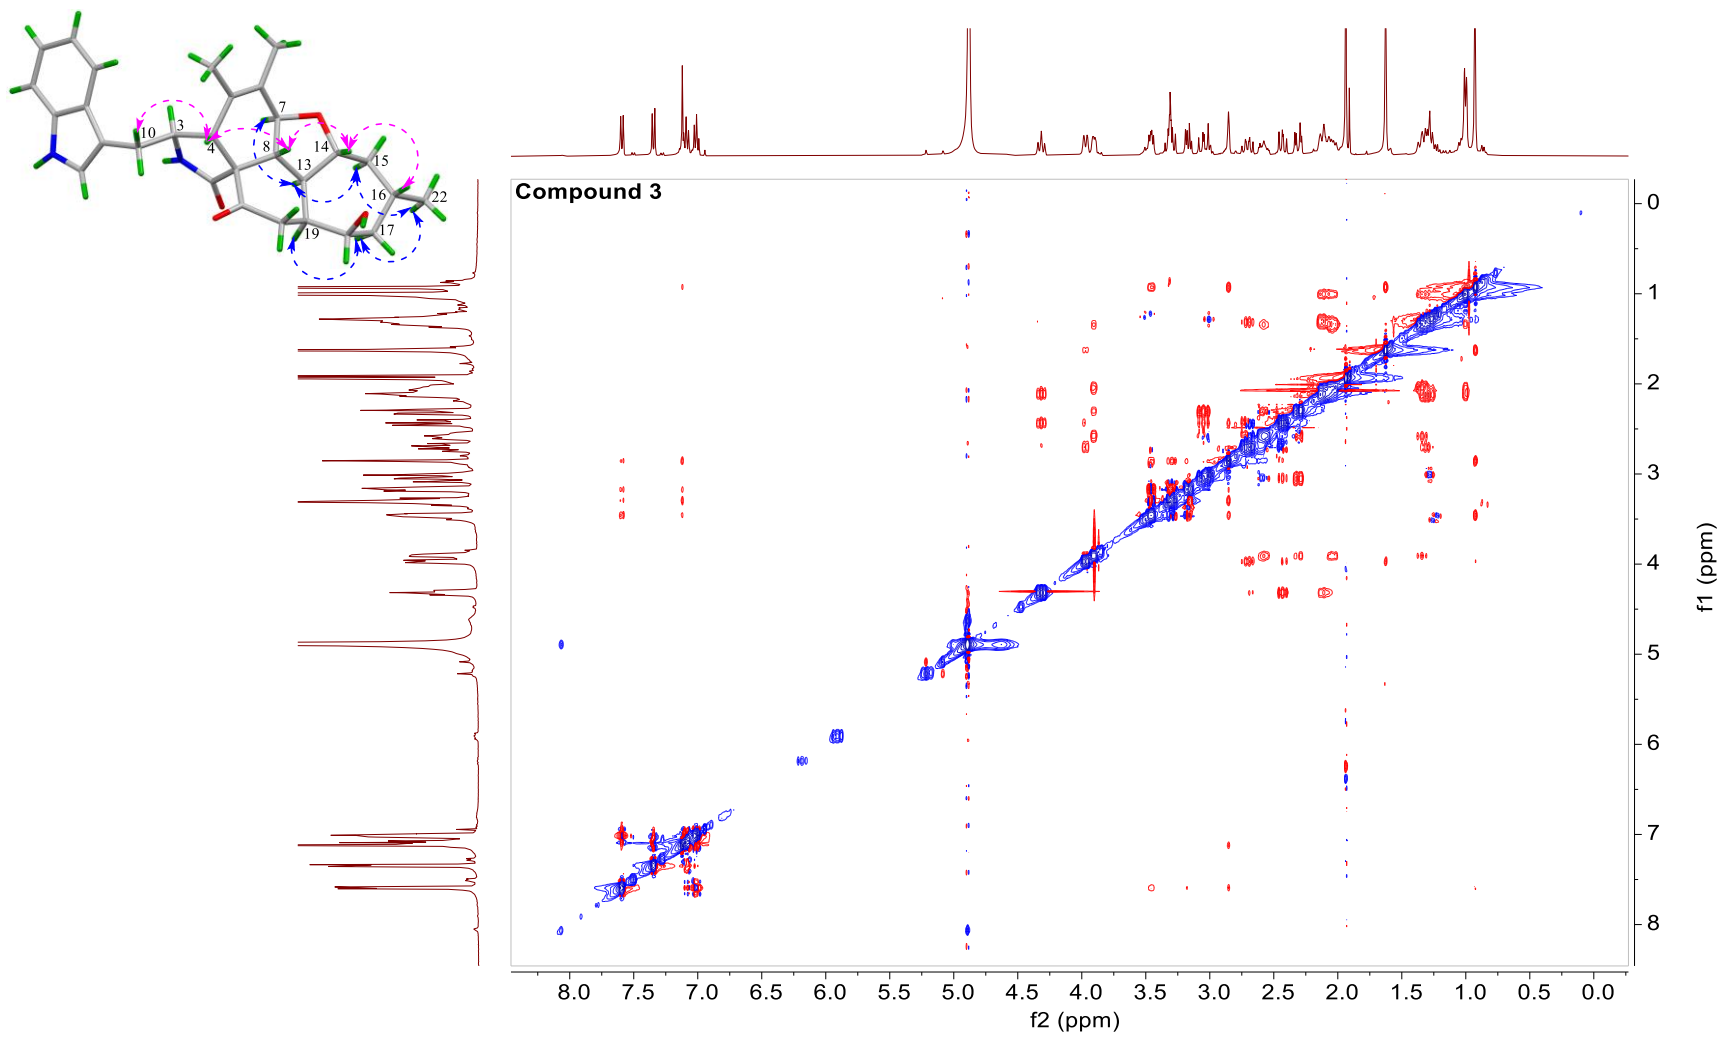

**Fig. S43.** HRESIMS (+) spectrum of **3**.

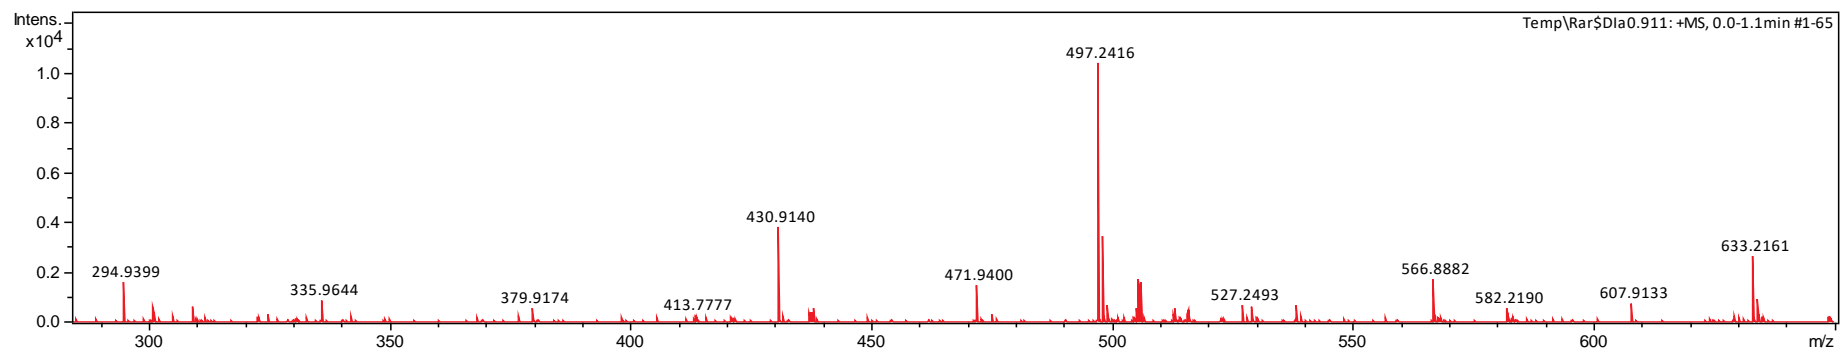

Fig. S44. UV spectrum of 3.

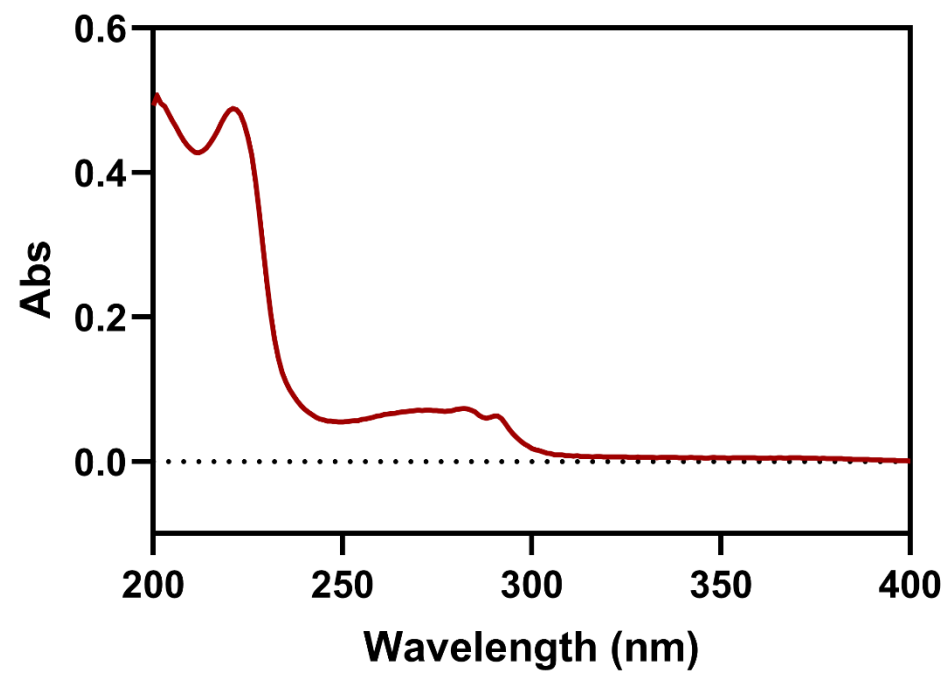

Fig. S45. IR spectrum of 3.

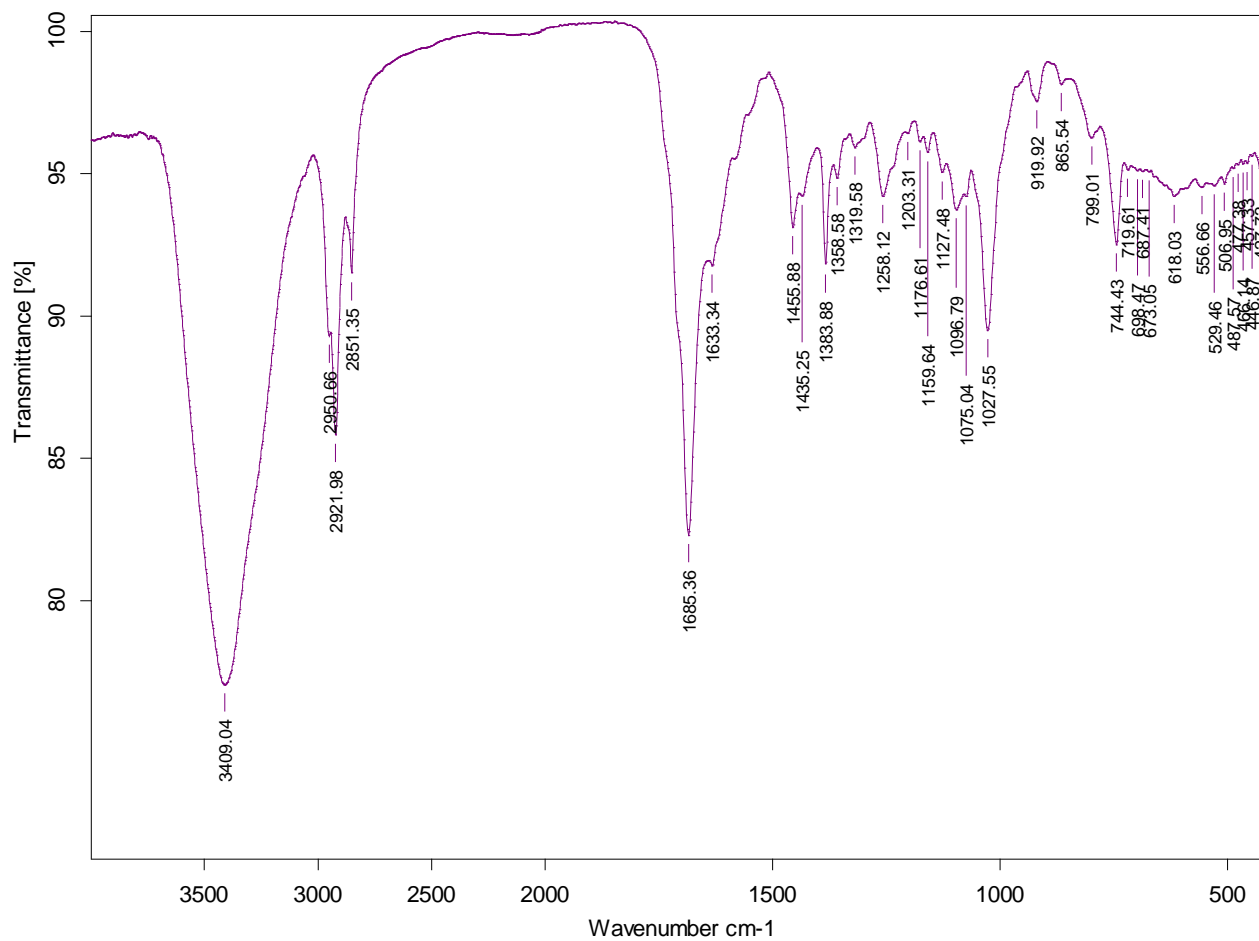

Fig. S46. ECD spectrum of 3.

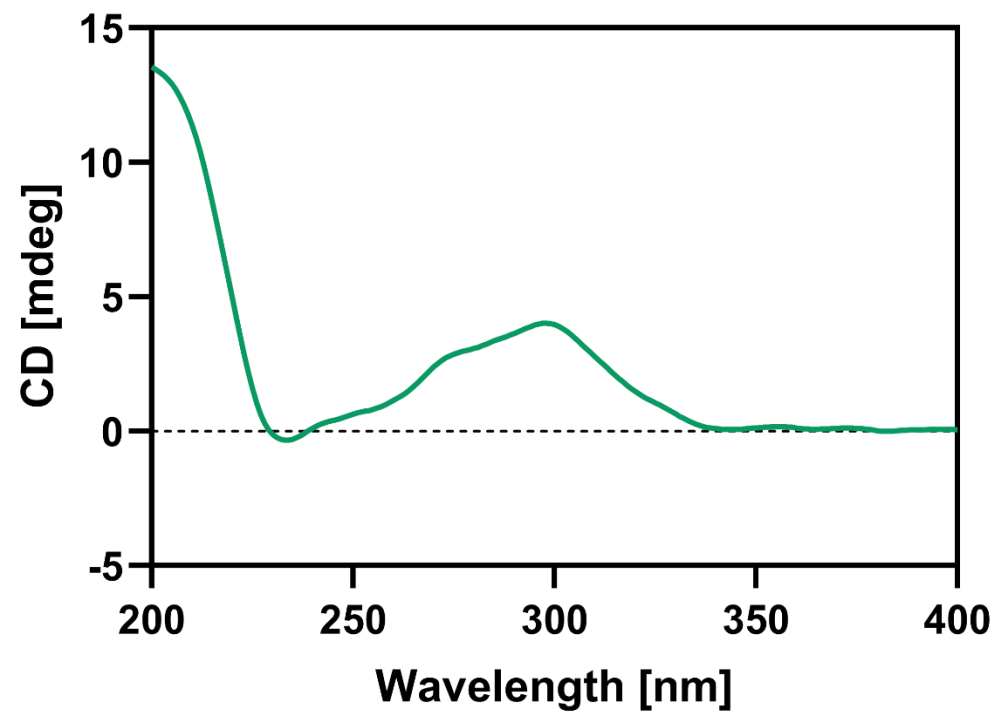

Fig. S47. <sup>1</sup>H NMR (400 MHz, CDCl<sub>3</sub>) spectrum of 4.

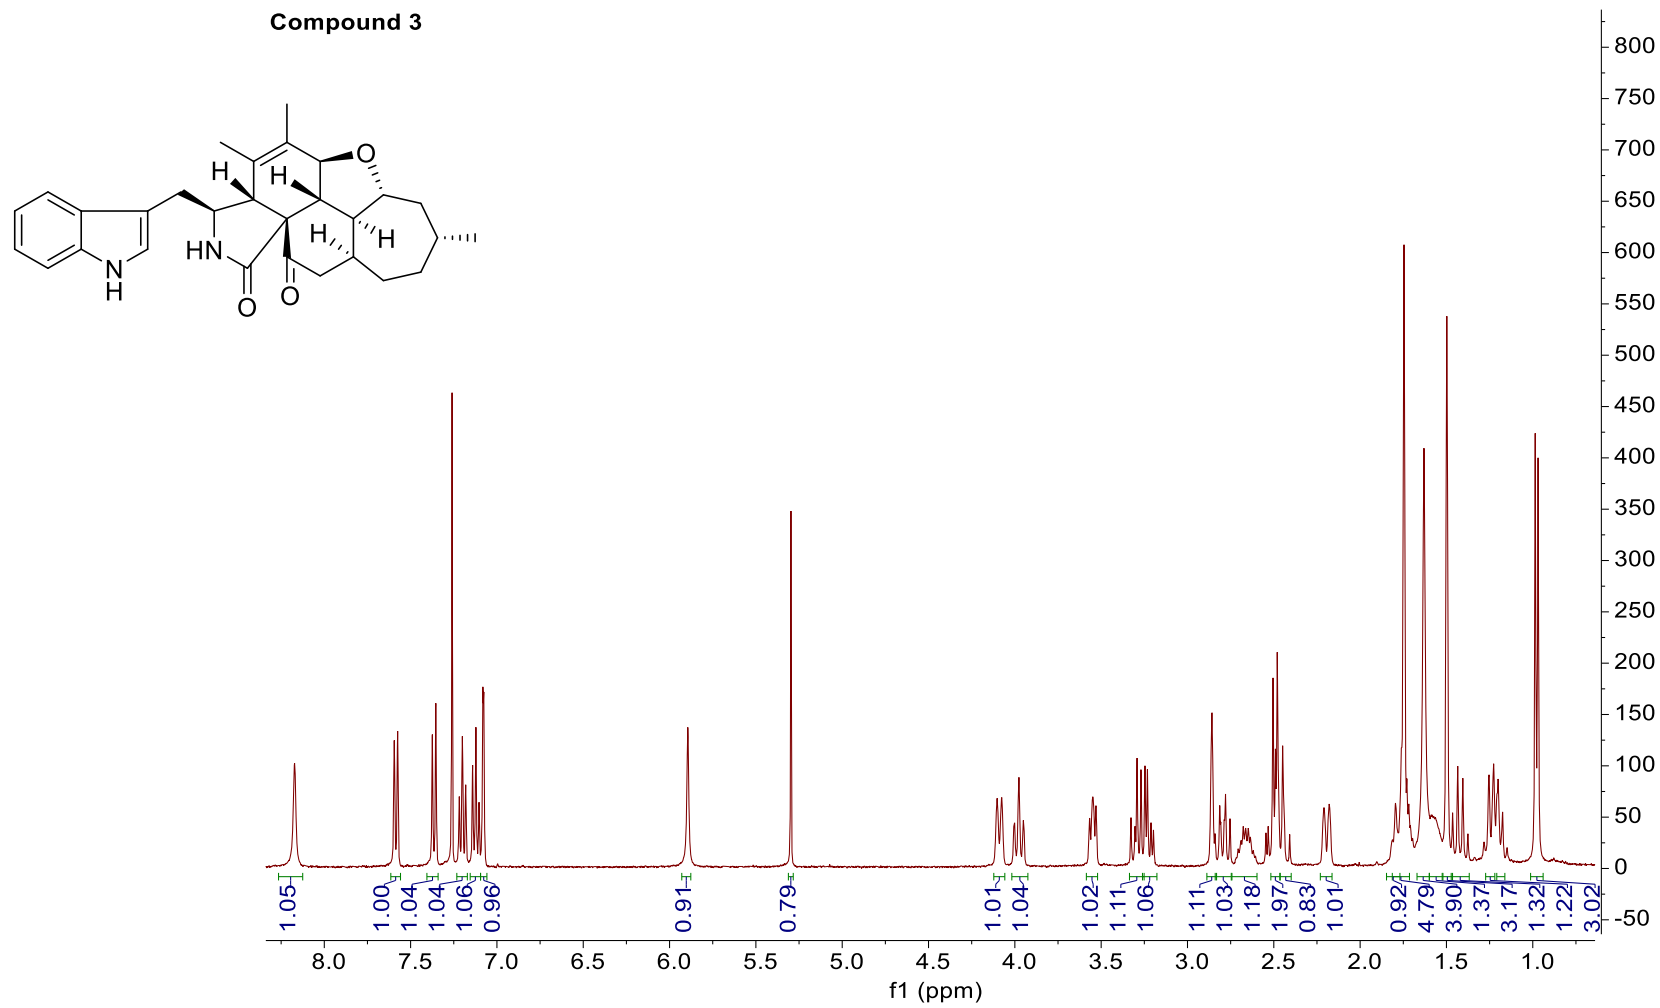

Fig. S48. Enlarged  $^1\text{H}$  NMR (400 MHz,  $\text{CDCl}_3$ ) spectrum of **4**.

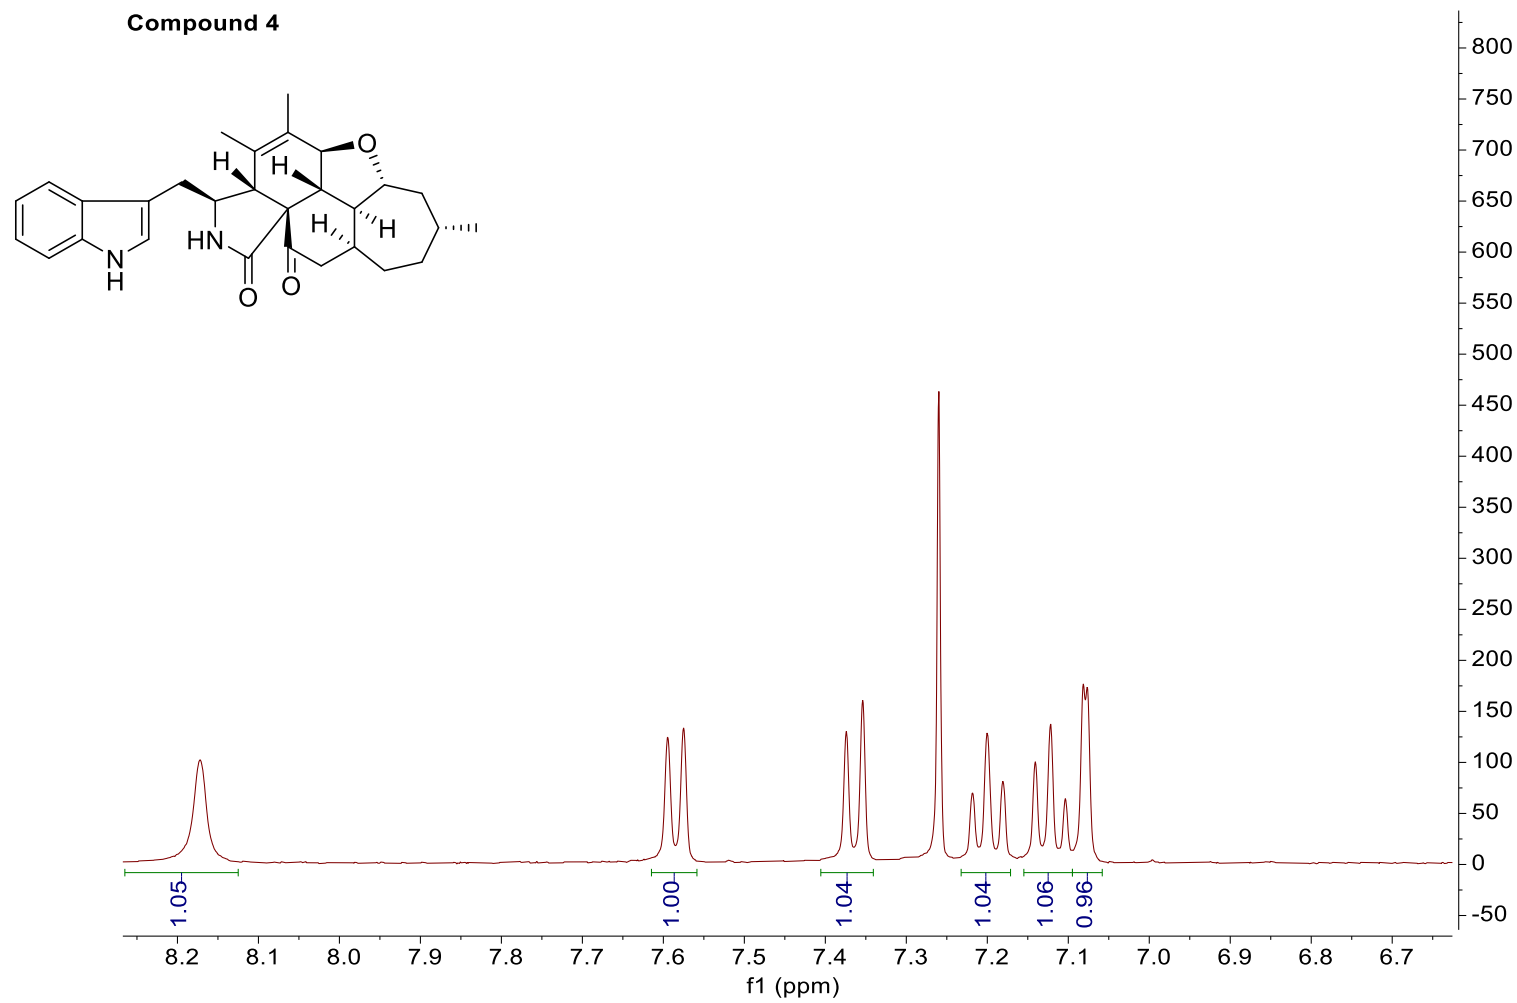



Compound 4

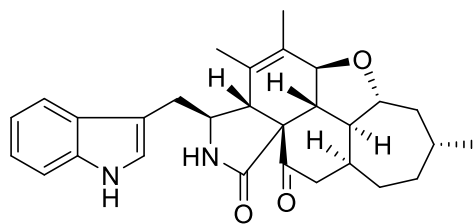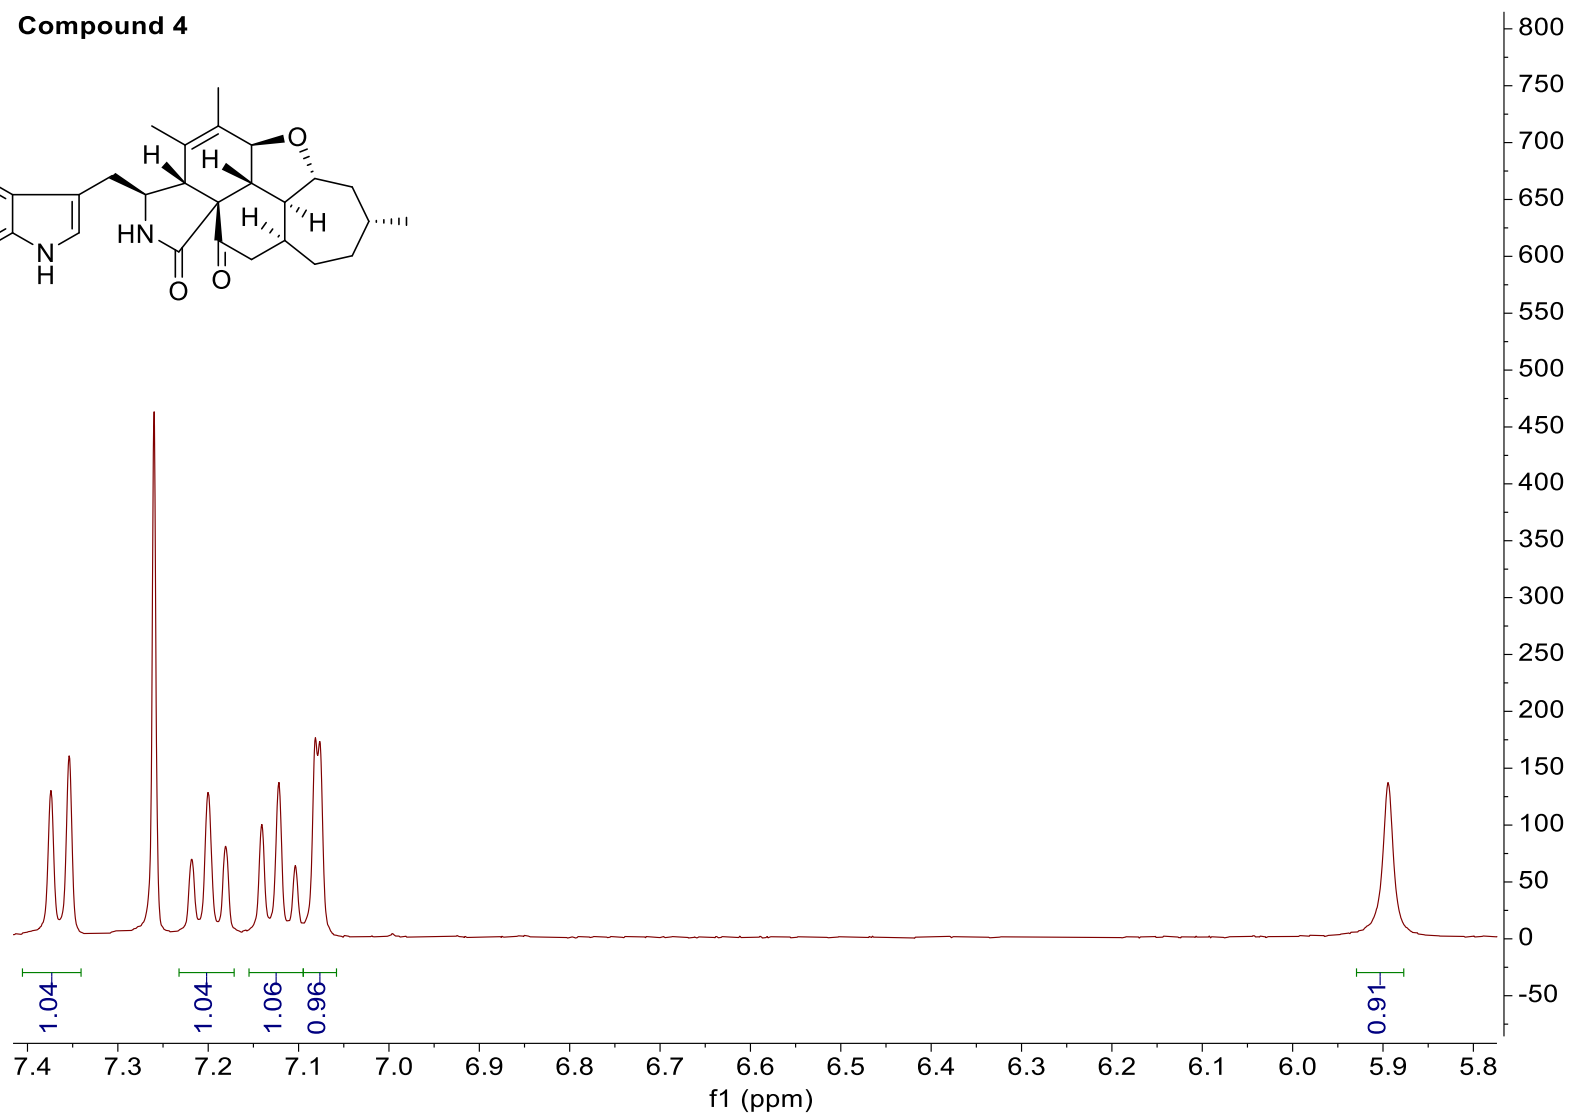

**Compound 4**

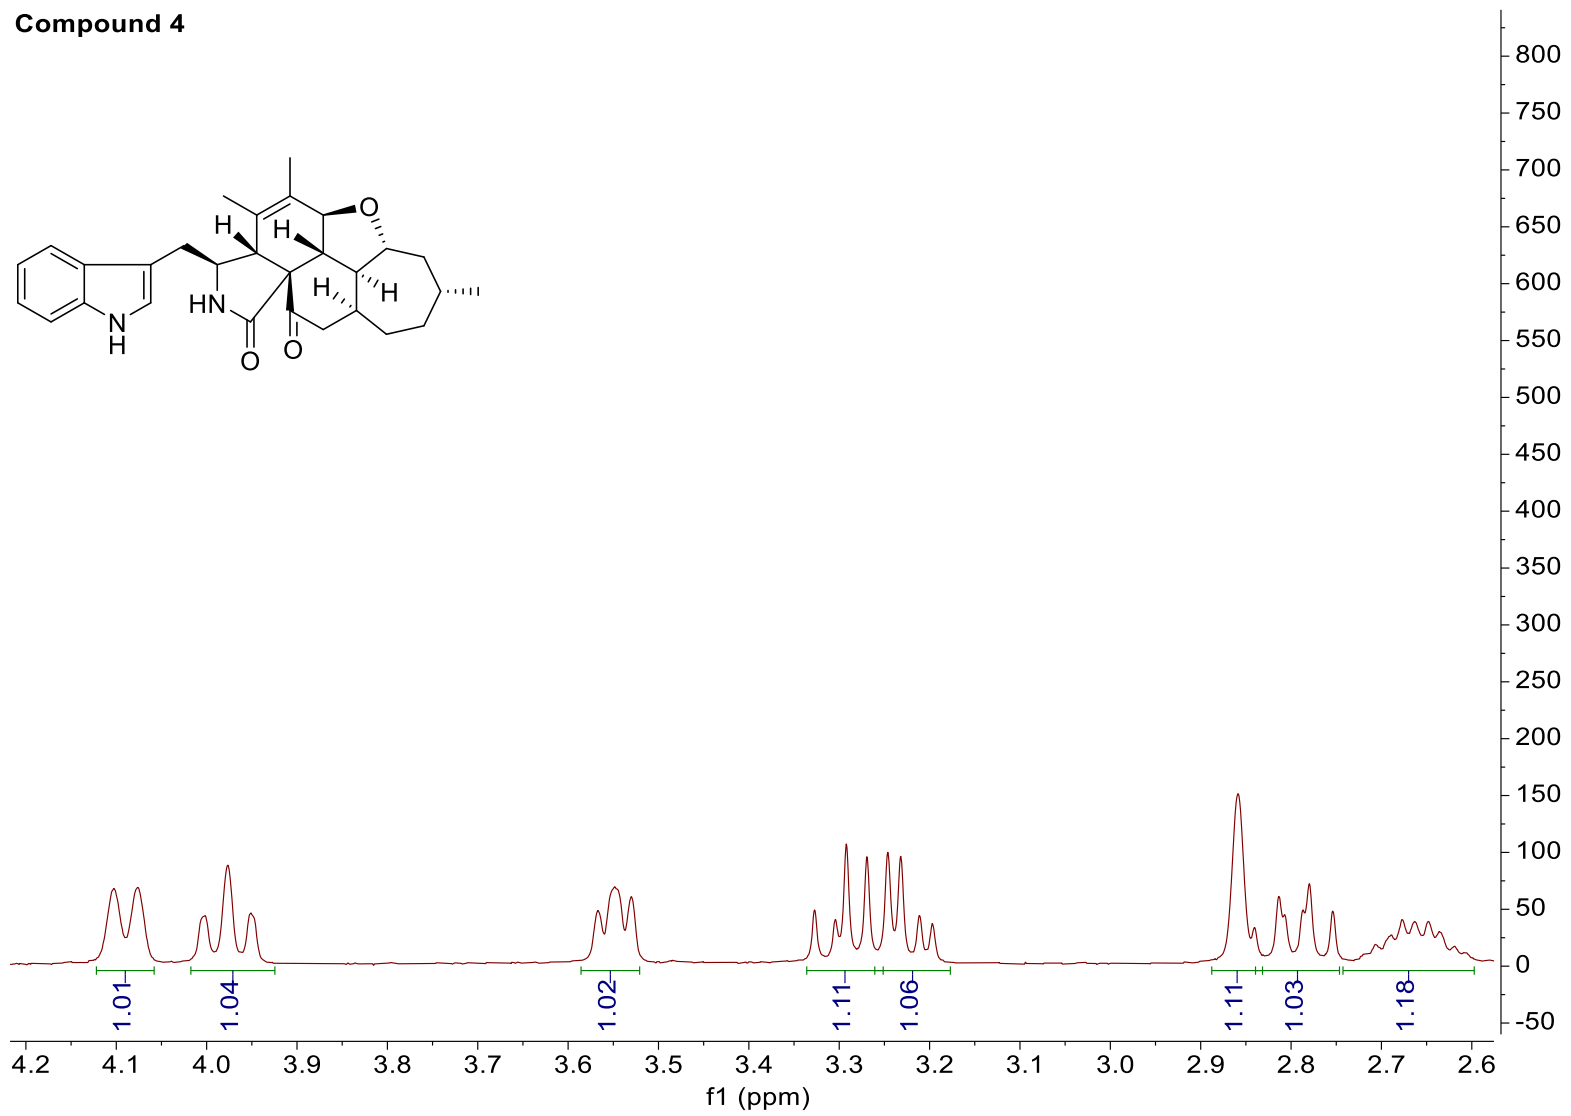

Compound 4

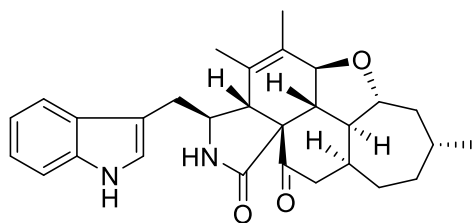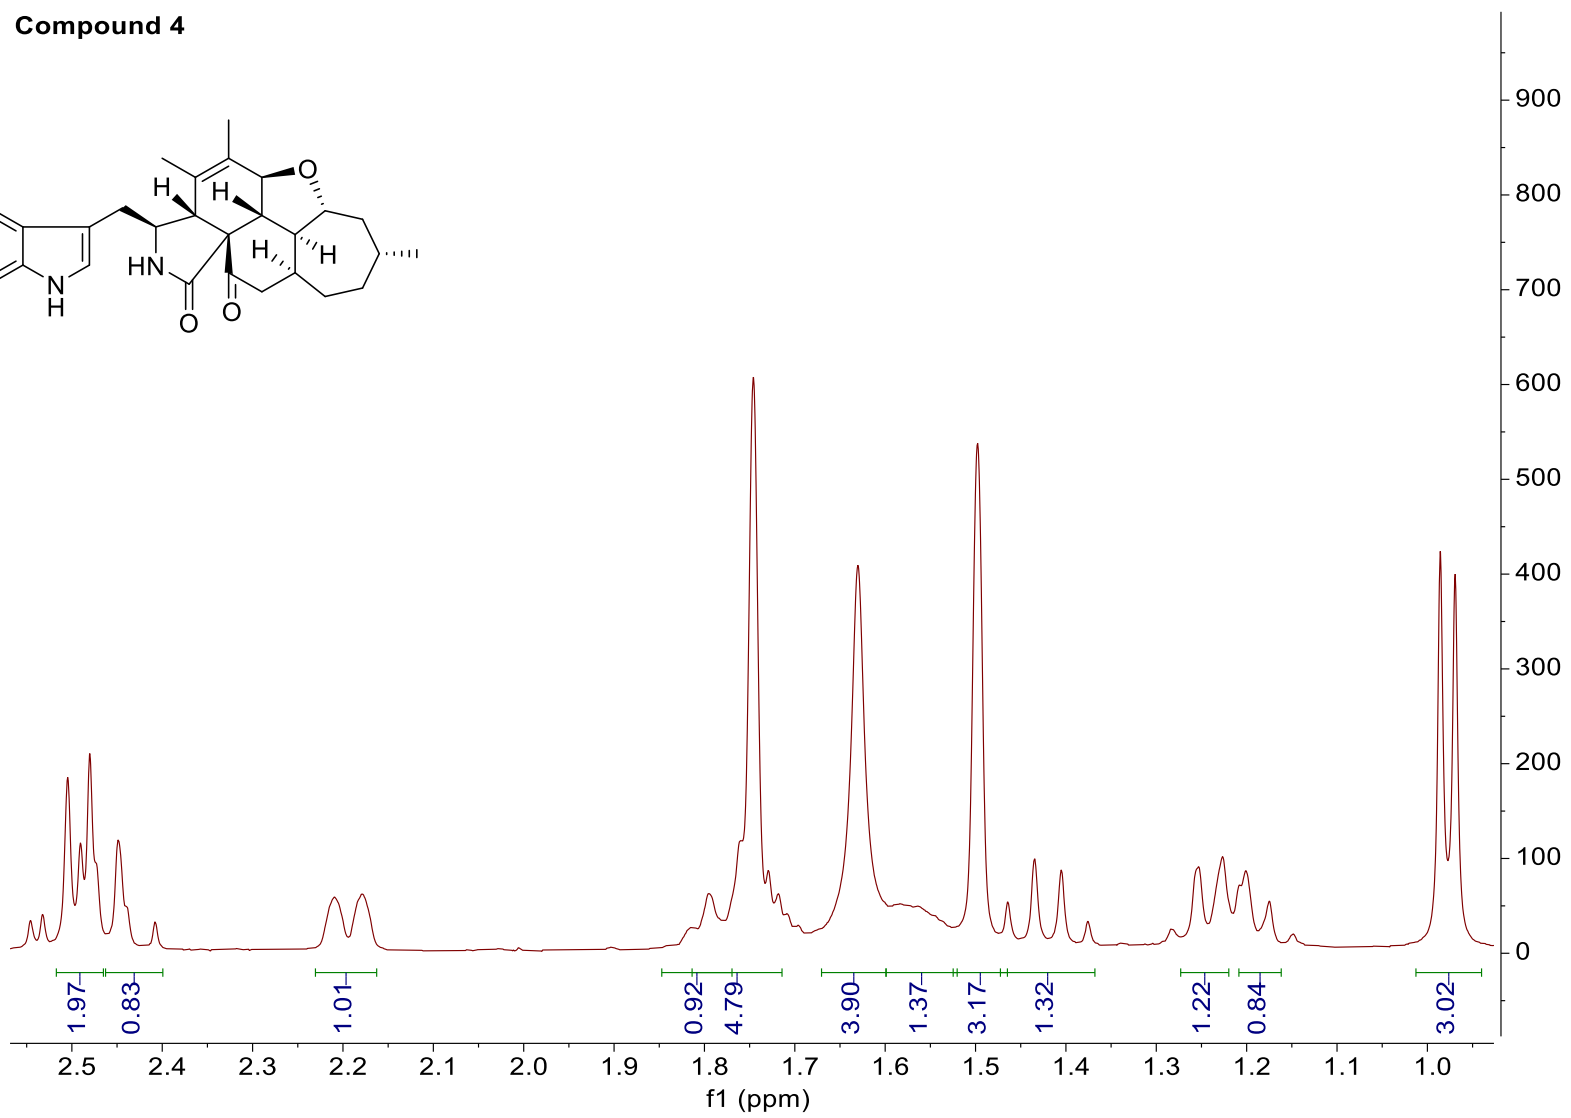

Fig. S49. <sup>13</sup>C NMR (100 MHz, CDCl<sub>3</sub>) spectrum of 4.

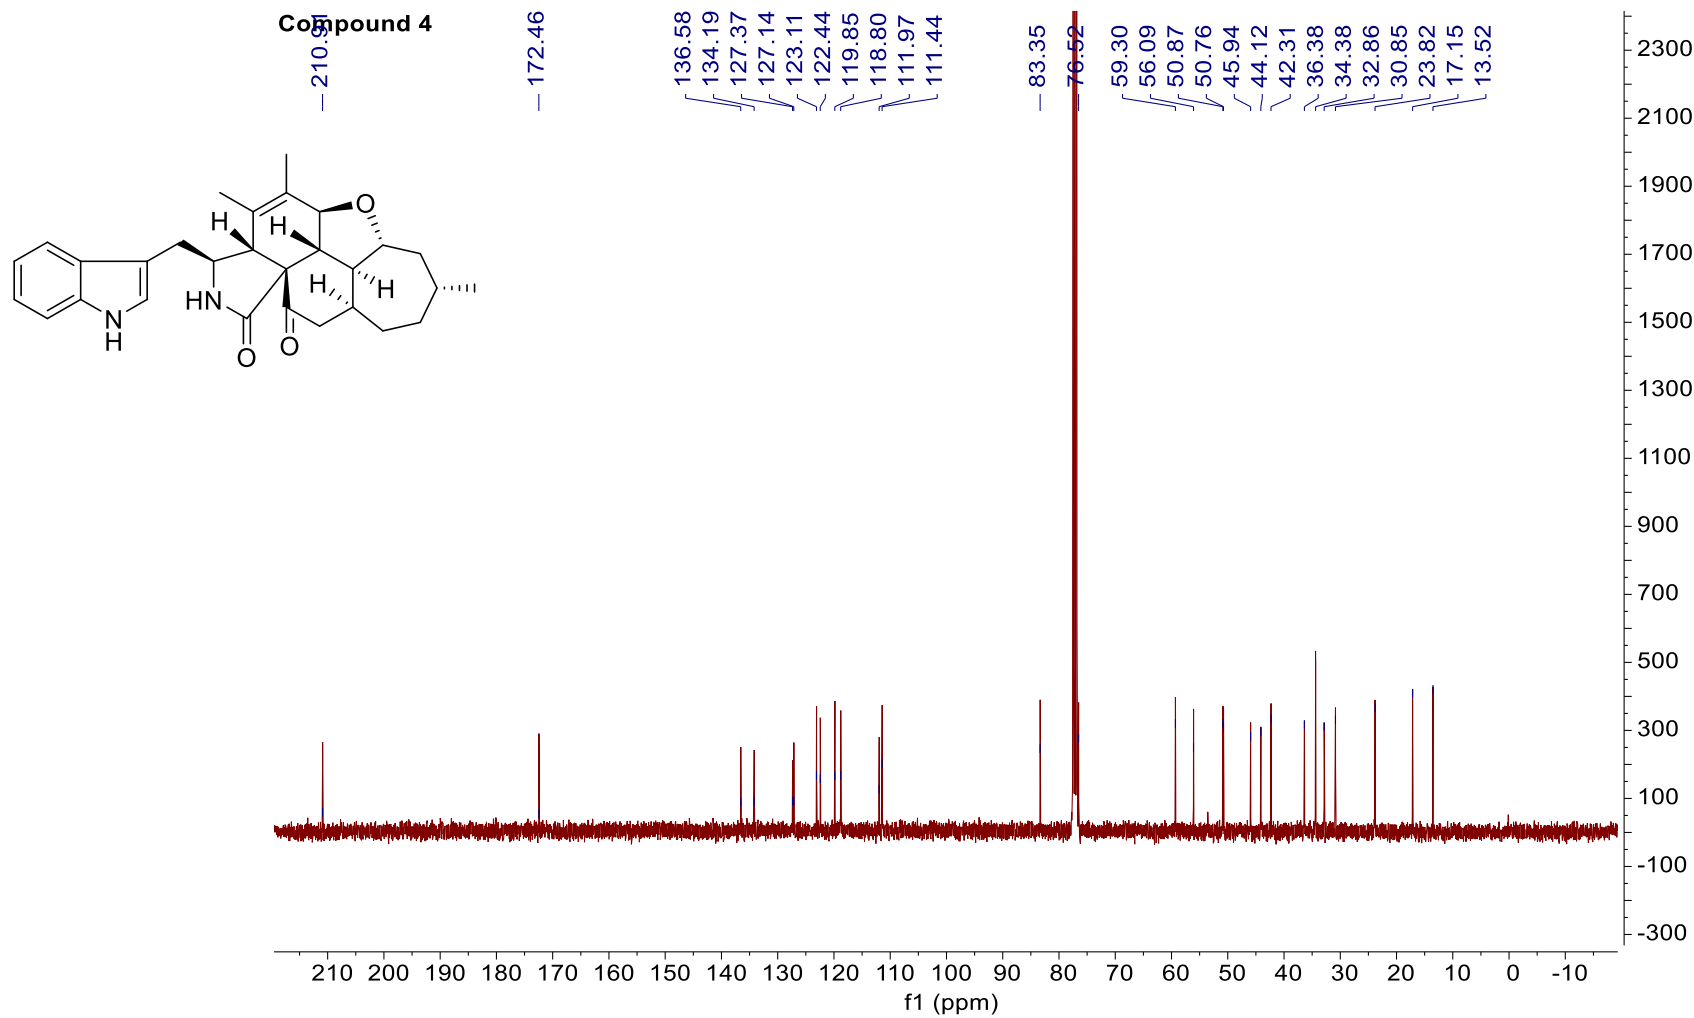

Fig. S50. DEPT-135 (100 MHz, CDCl<sub>3</sub>) spectrum of 4.

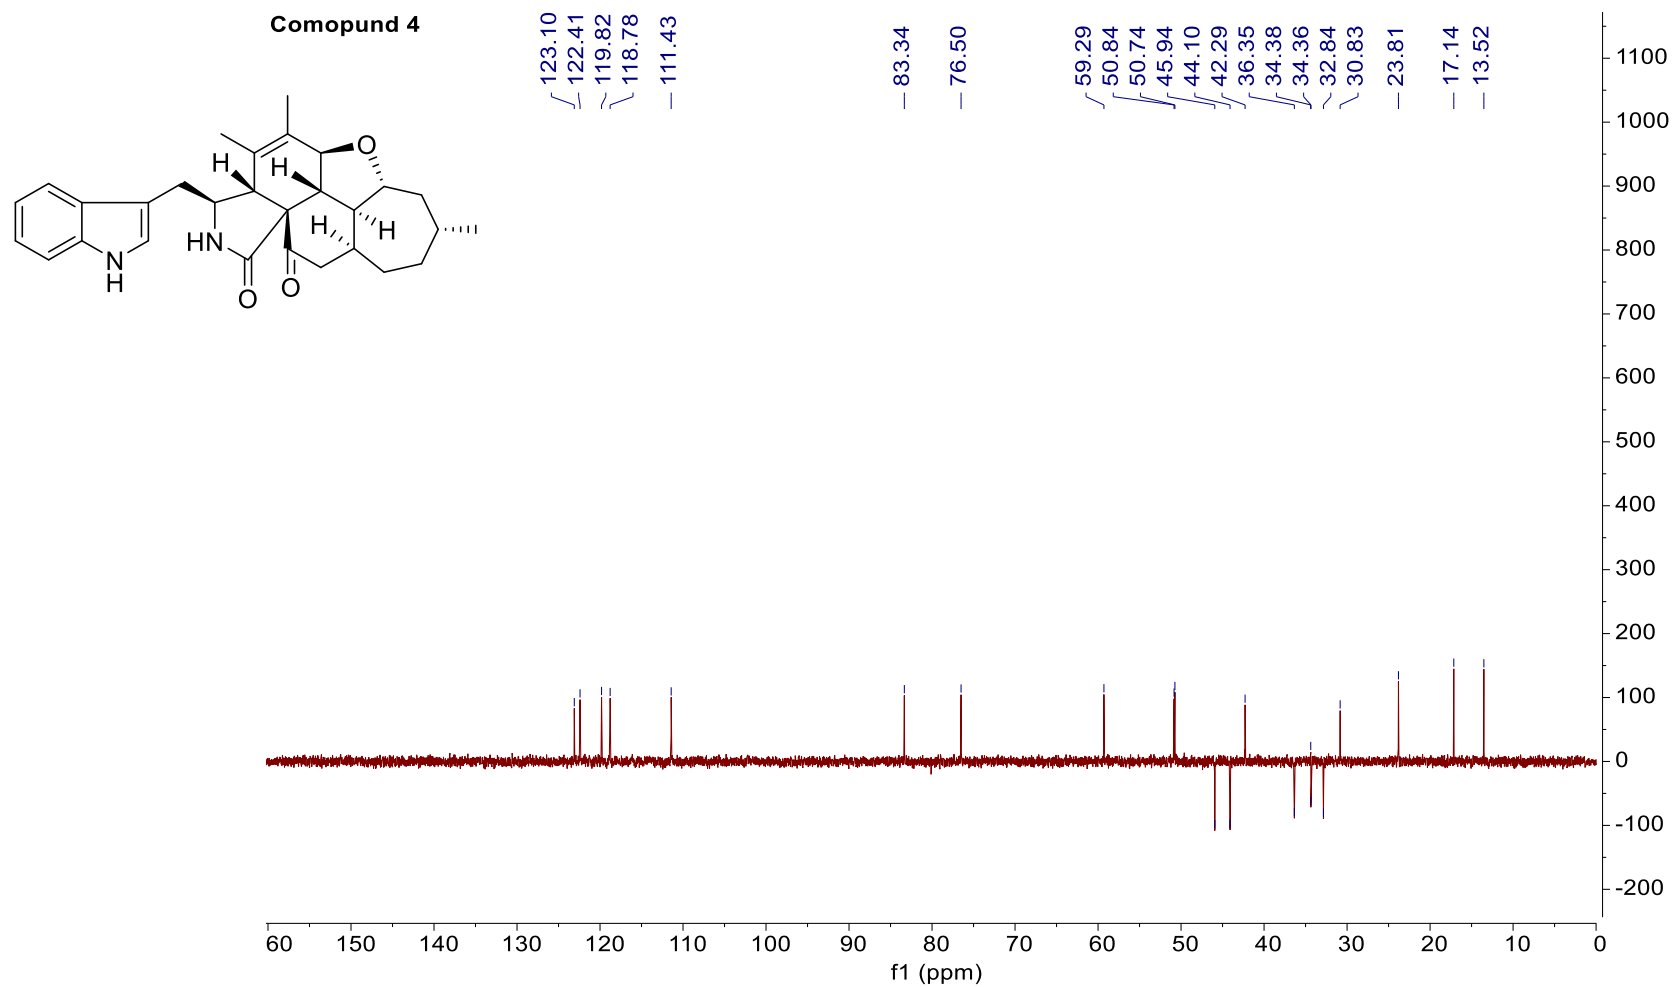

Fig. S51. HSQC spectrum of 4 in CDCl<sub>3</sub>.

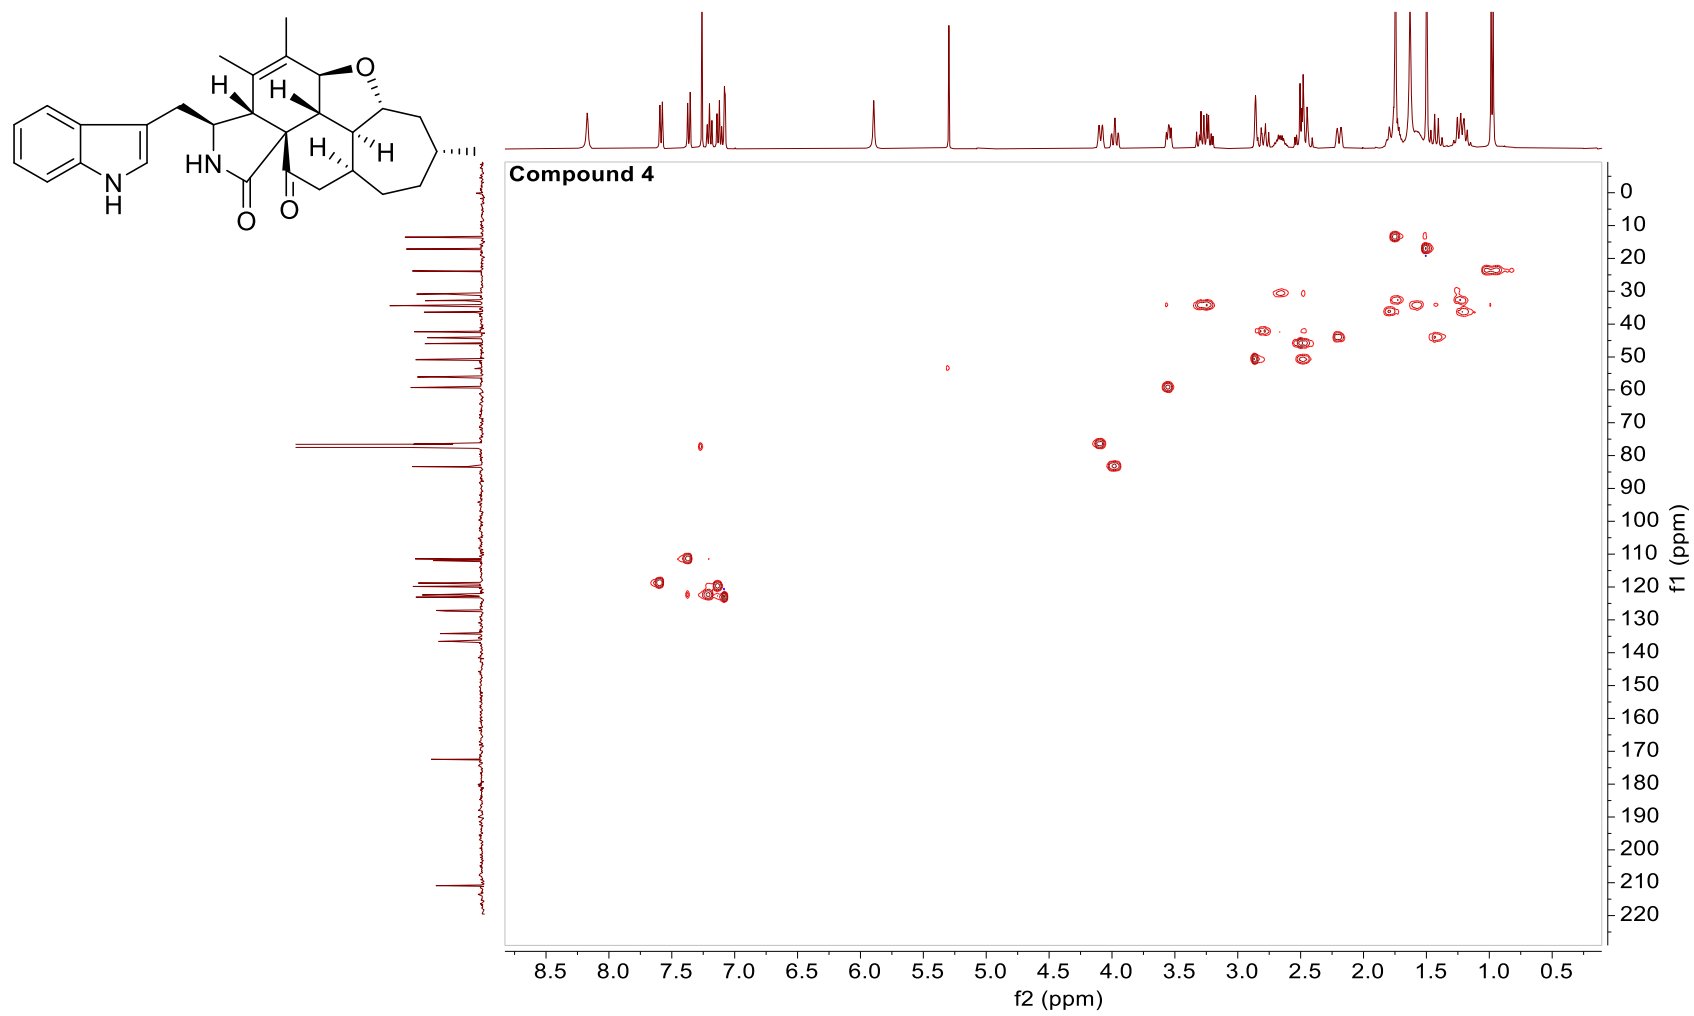

Fig. S52. HMBC spectrum of **4** in CDCl<sub>3</sub>.

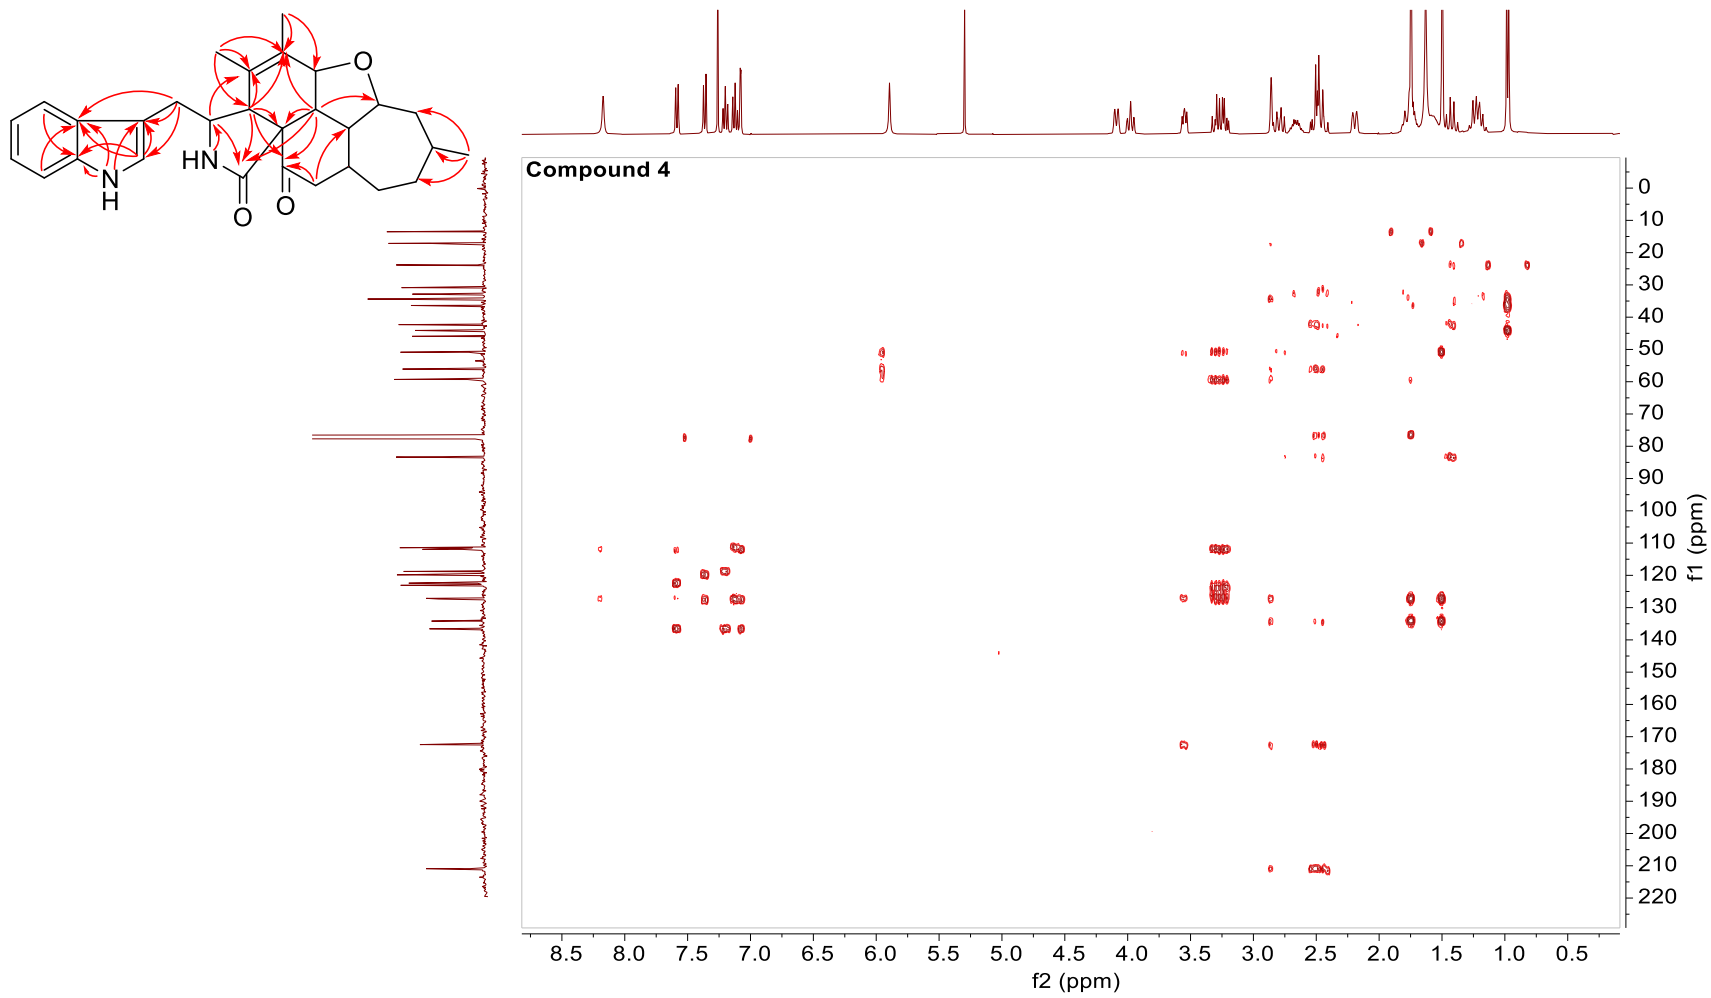

Fig. S53.  $^1\text{H}$ - $^1\text{H}$  COSY spectrum of **4** in  $\text{CDCl}_3$ .

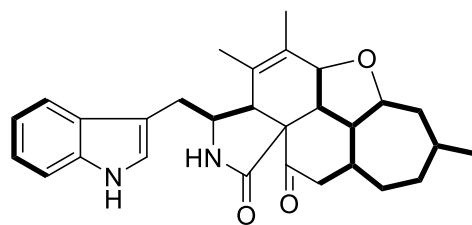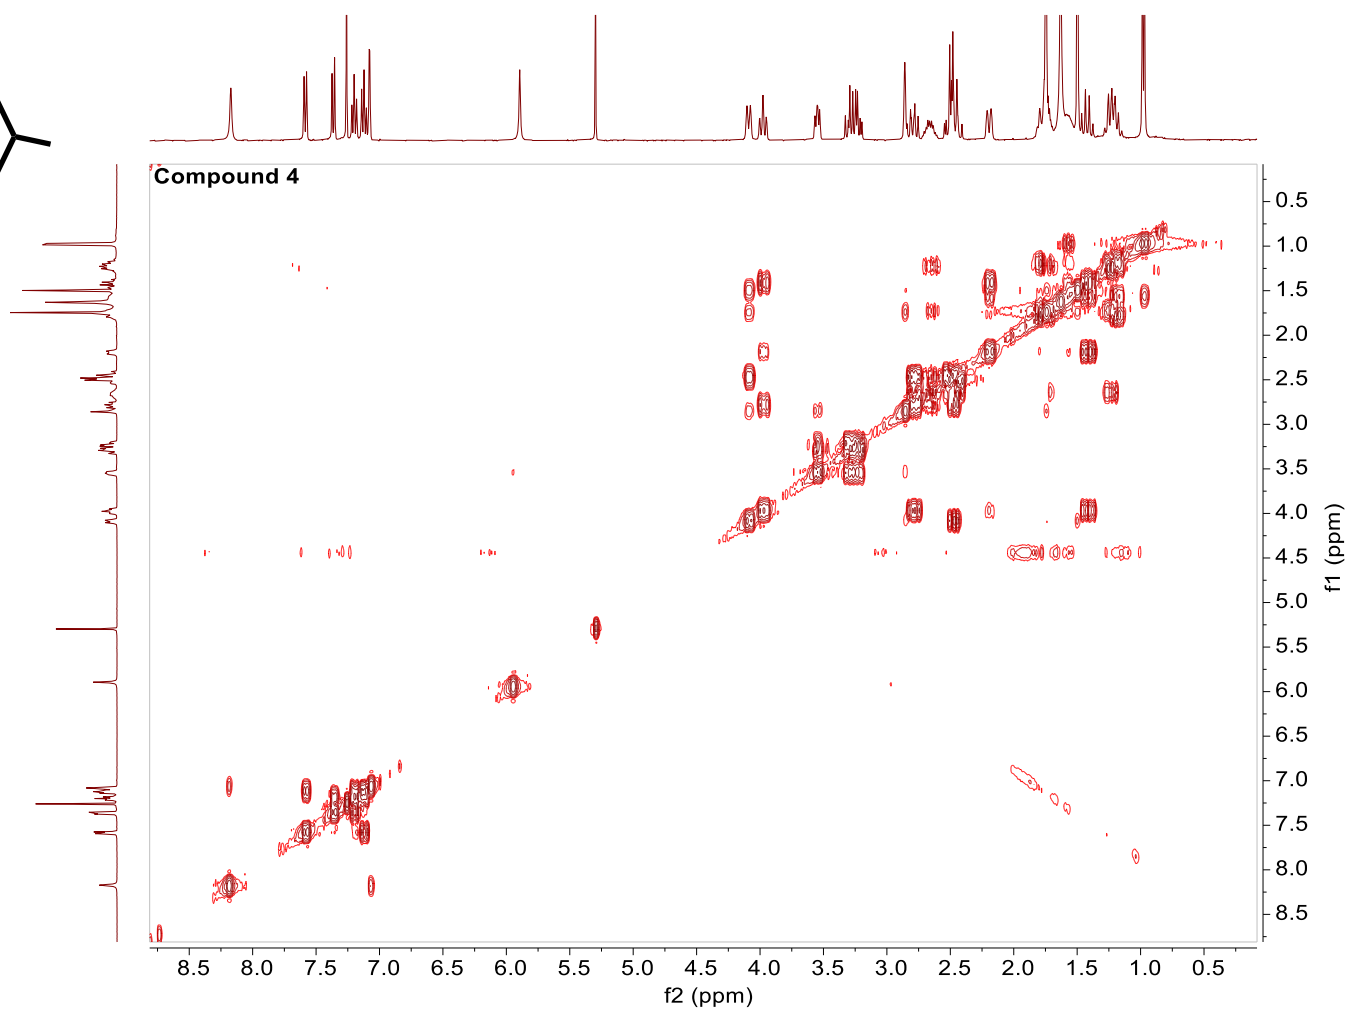



Fig. S54. NOESY spectrum of **4** in CDCl<sub>3</sub>.

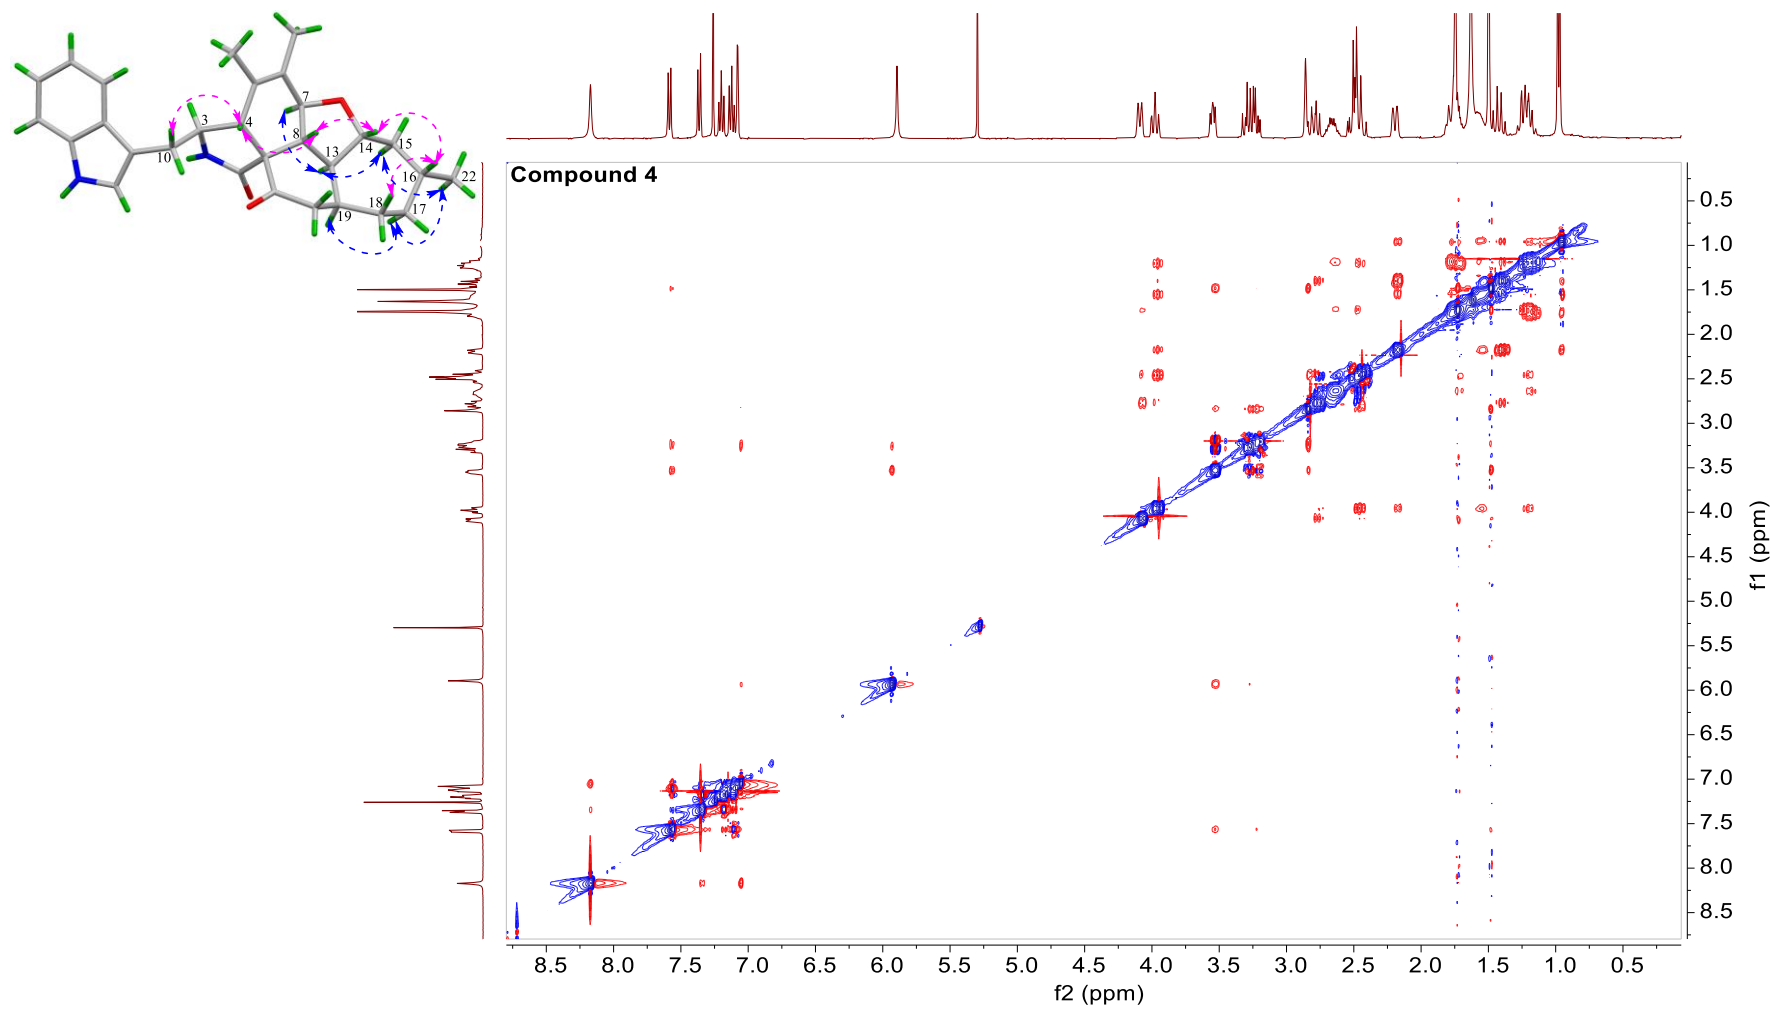

**Fig. S55.** HRESIMS (+) spectrum of **4**.

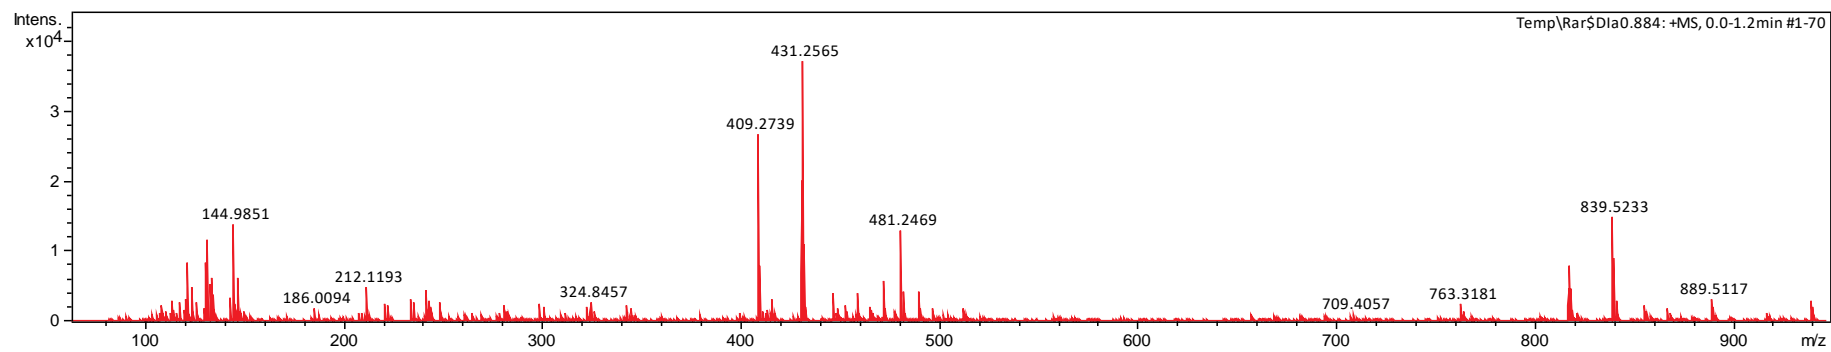

Fig. S56. UV spectrum of 4.

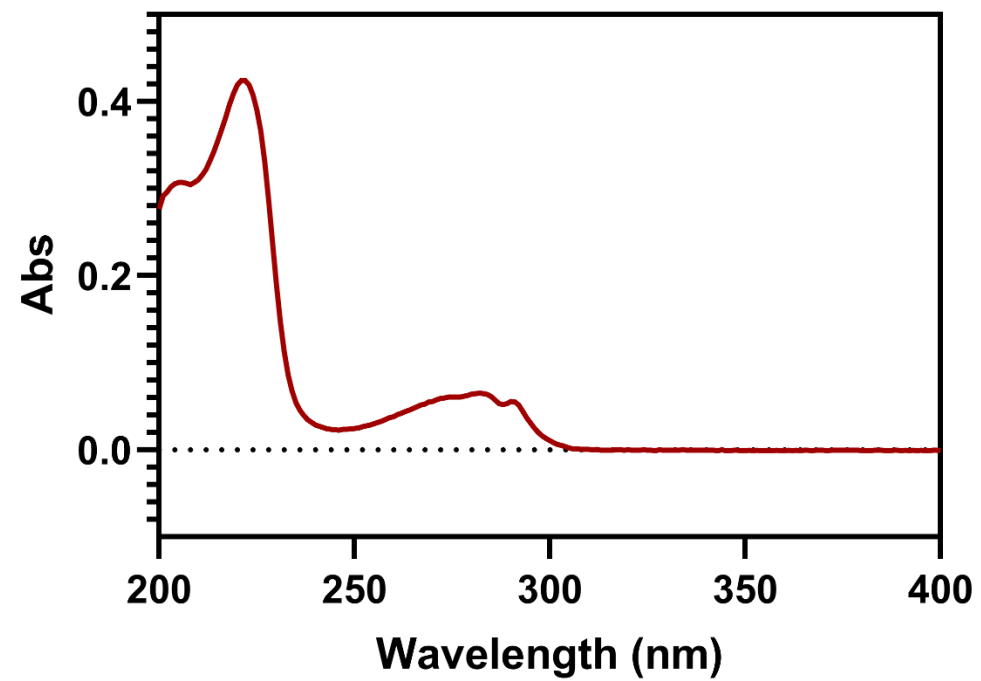

Fig. S57. IR spectrum of 4.

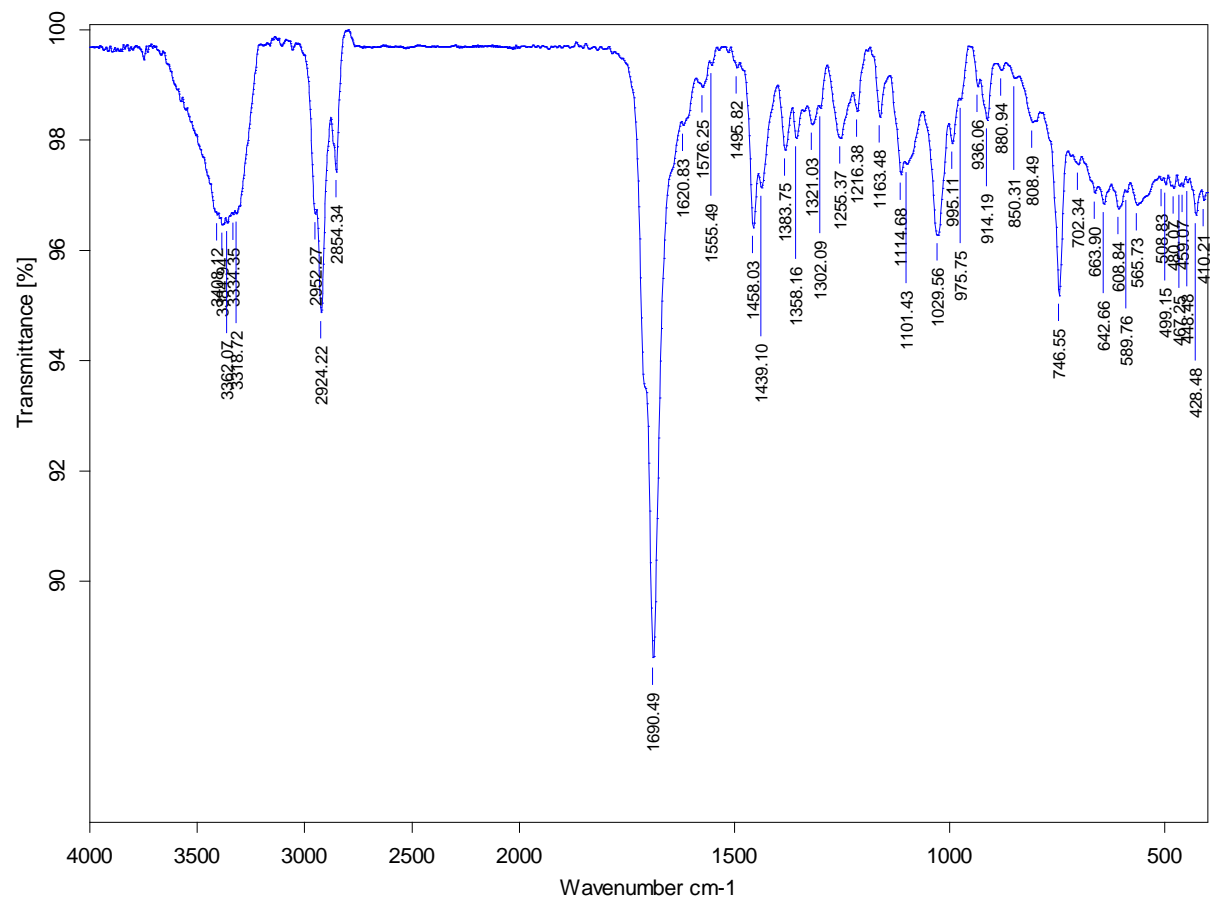

Fig. S58. ECD spectrum of 4.

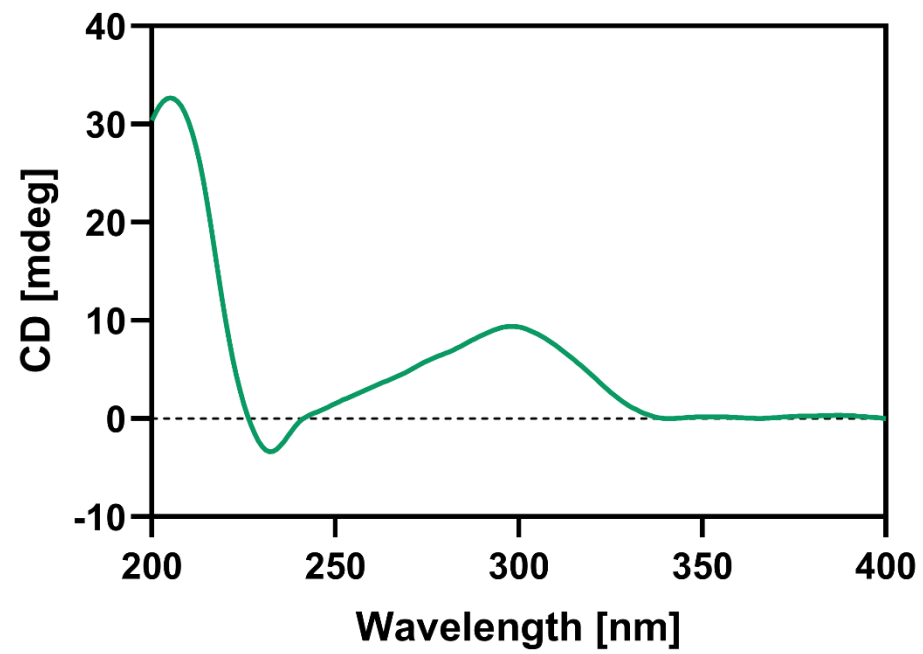

Fig. S59.  $^1\text{H}$  NMR (400 MHz,  $\text{CDCl}_3$ ) spectrum of **5**.

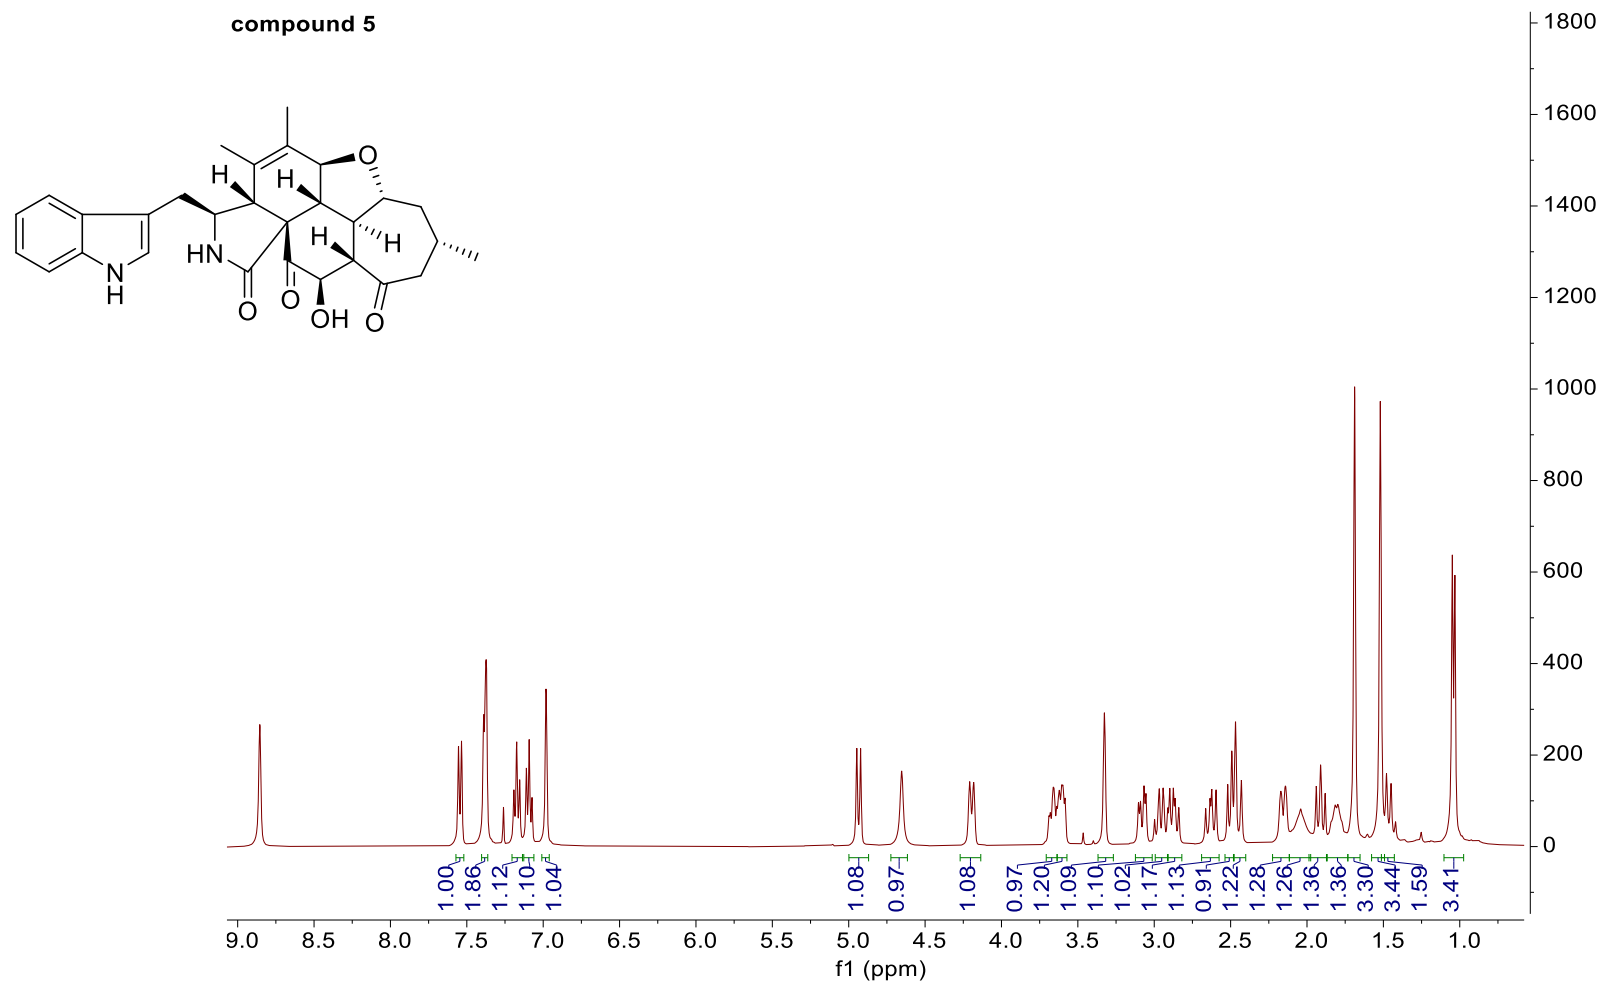

**Fig. S60.** Enlarged  $^1\text{H}$  NMR (400 MHz,  $\text{CDCl}_3$ ) spectrum of **5**.

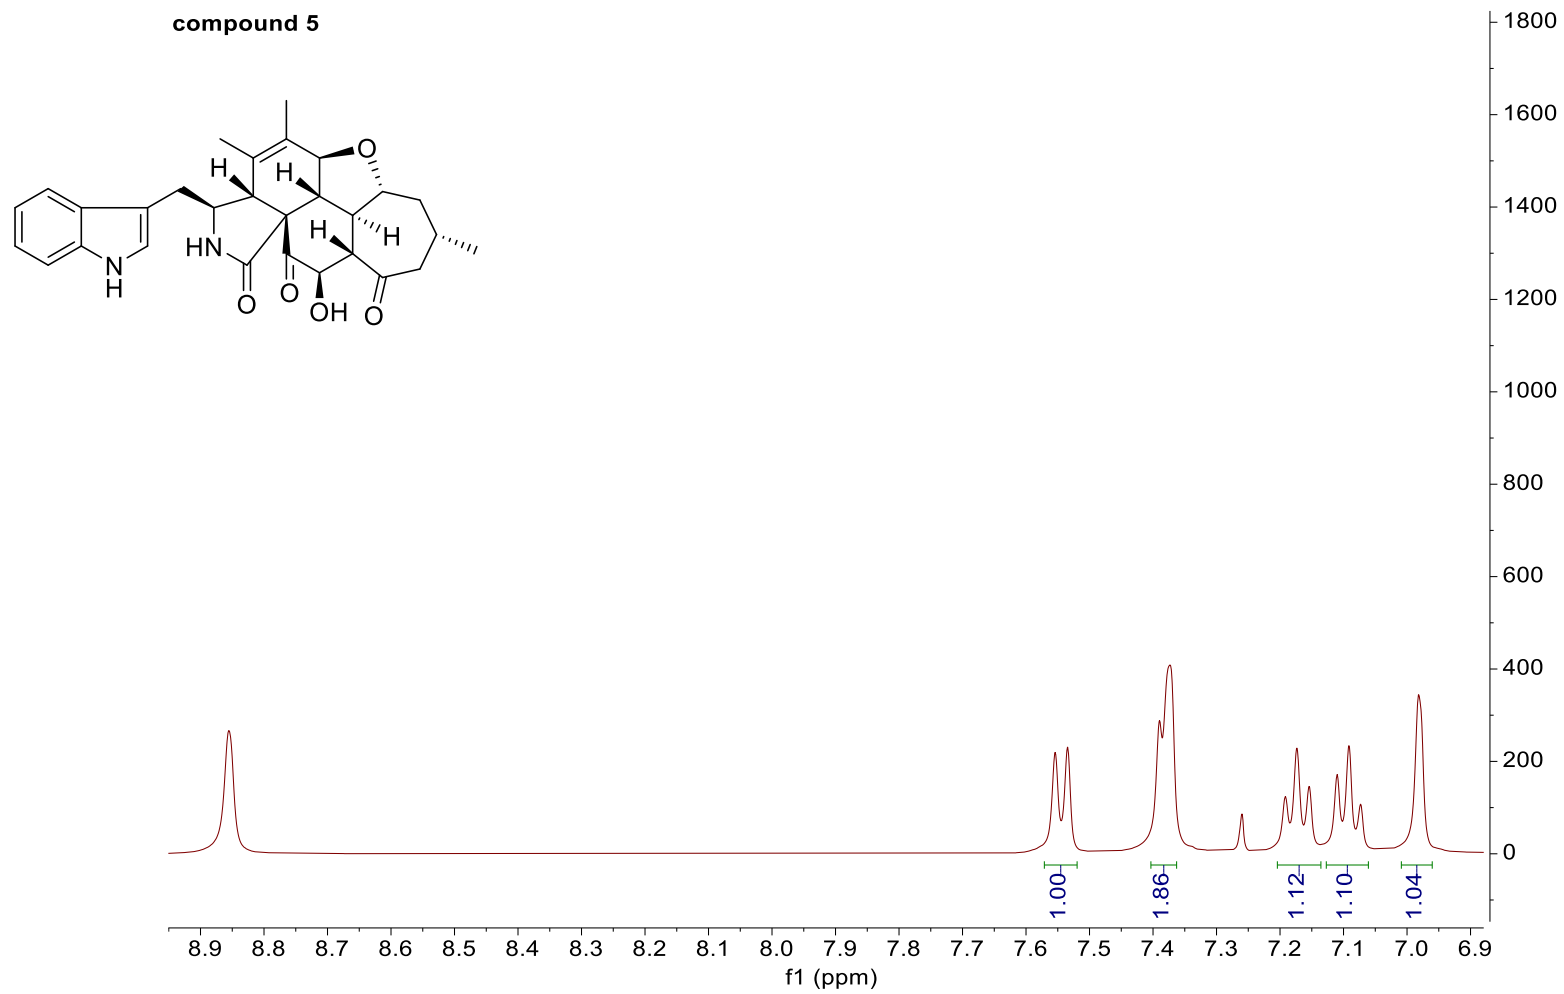

compound 5

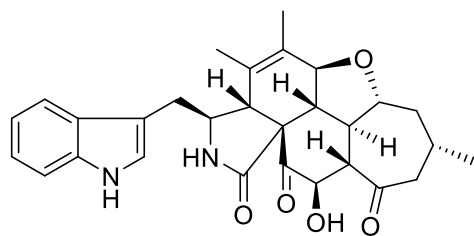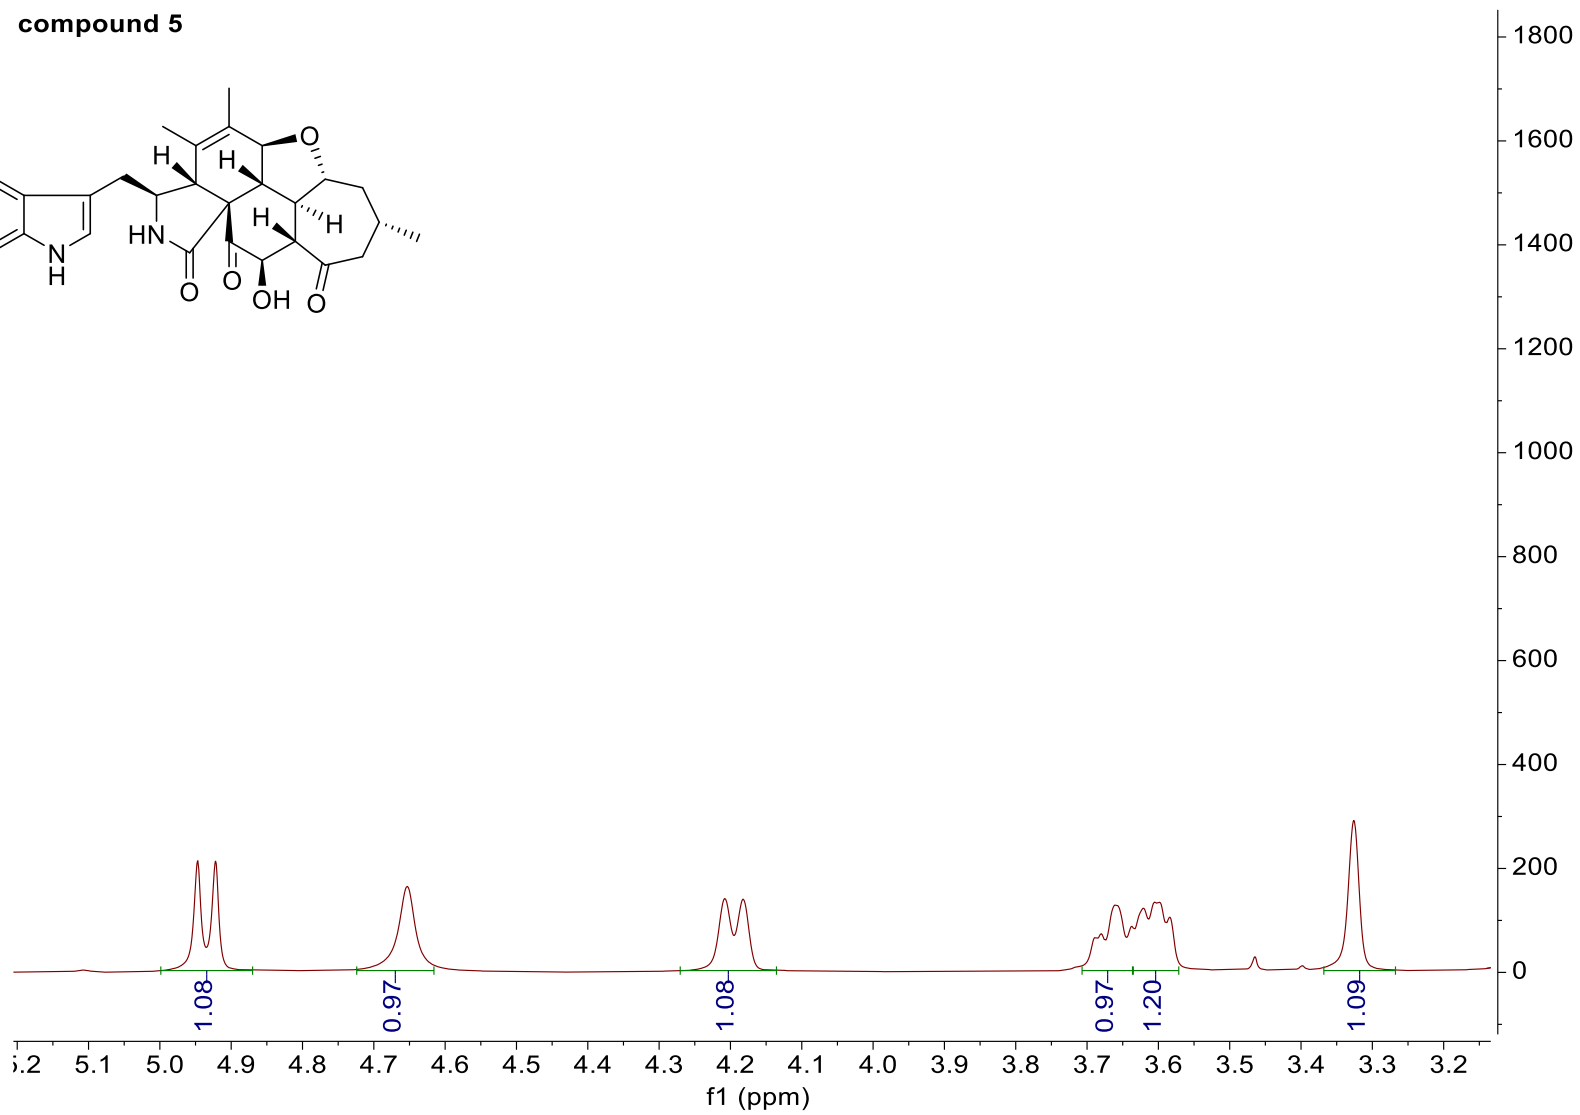



compound 5

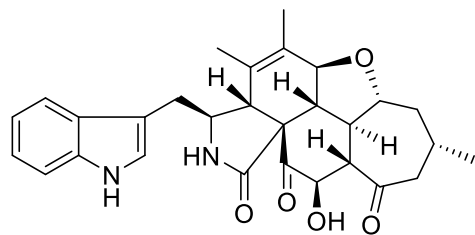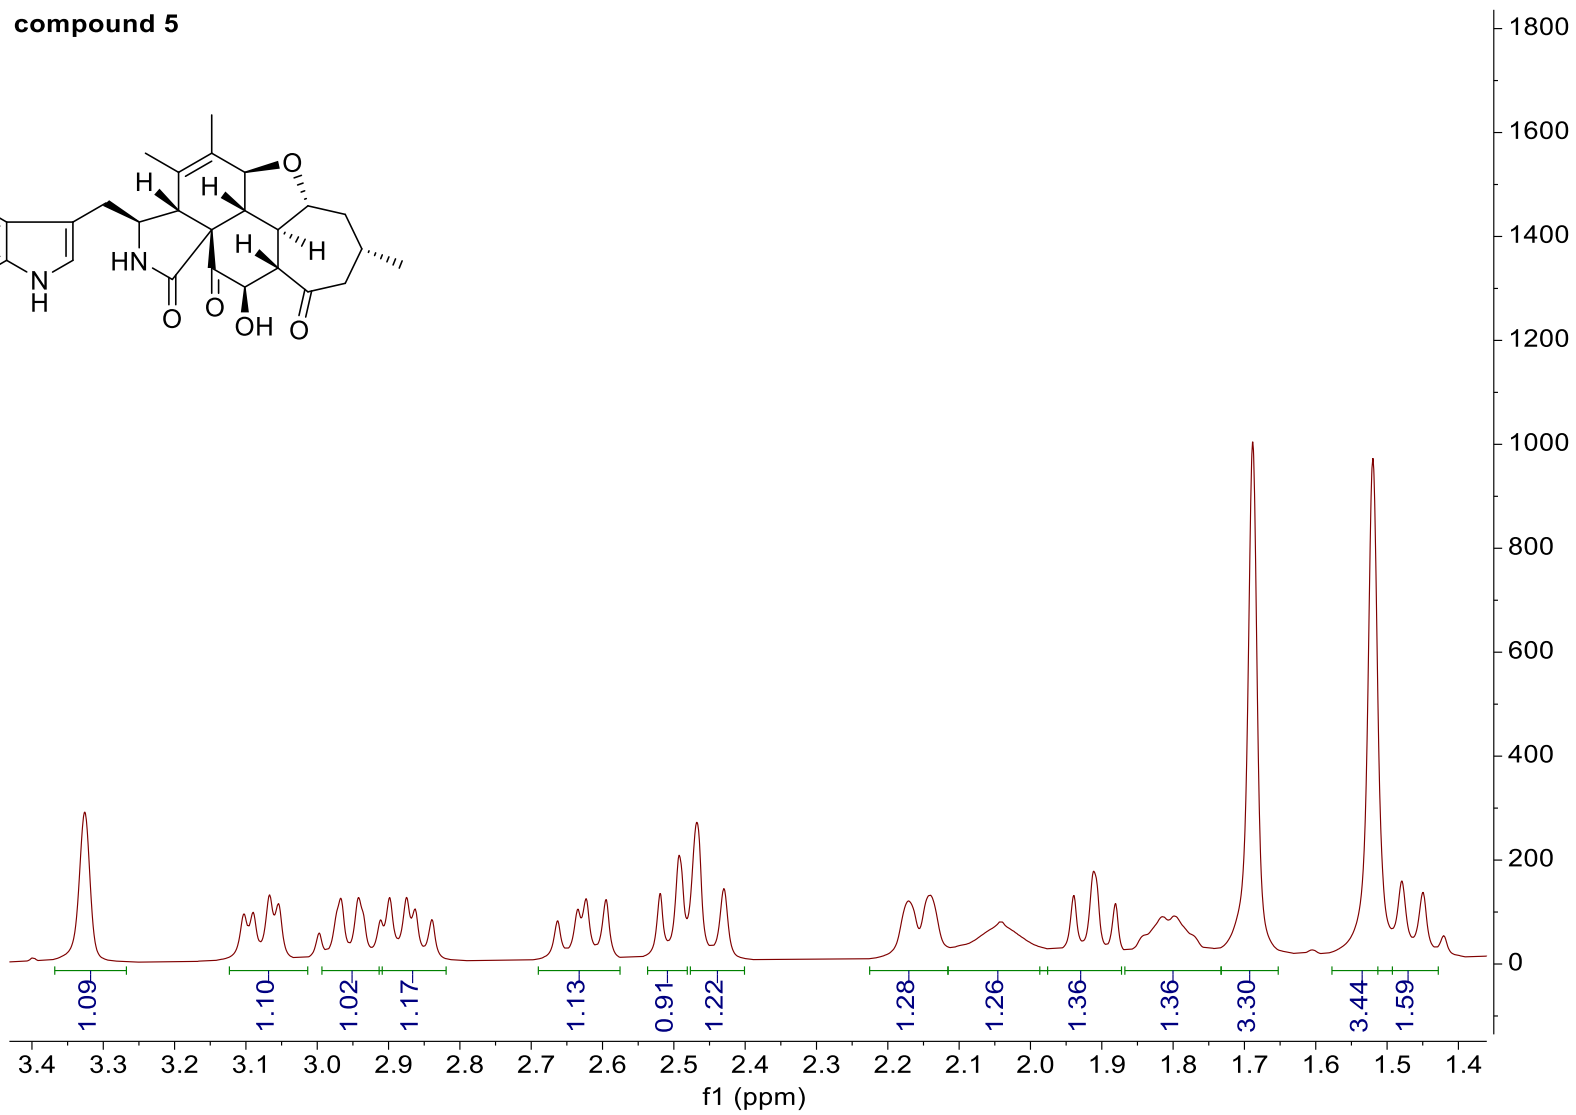

compound 5

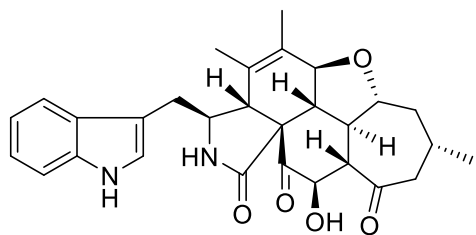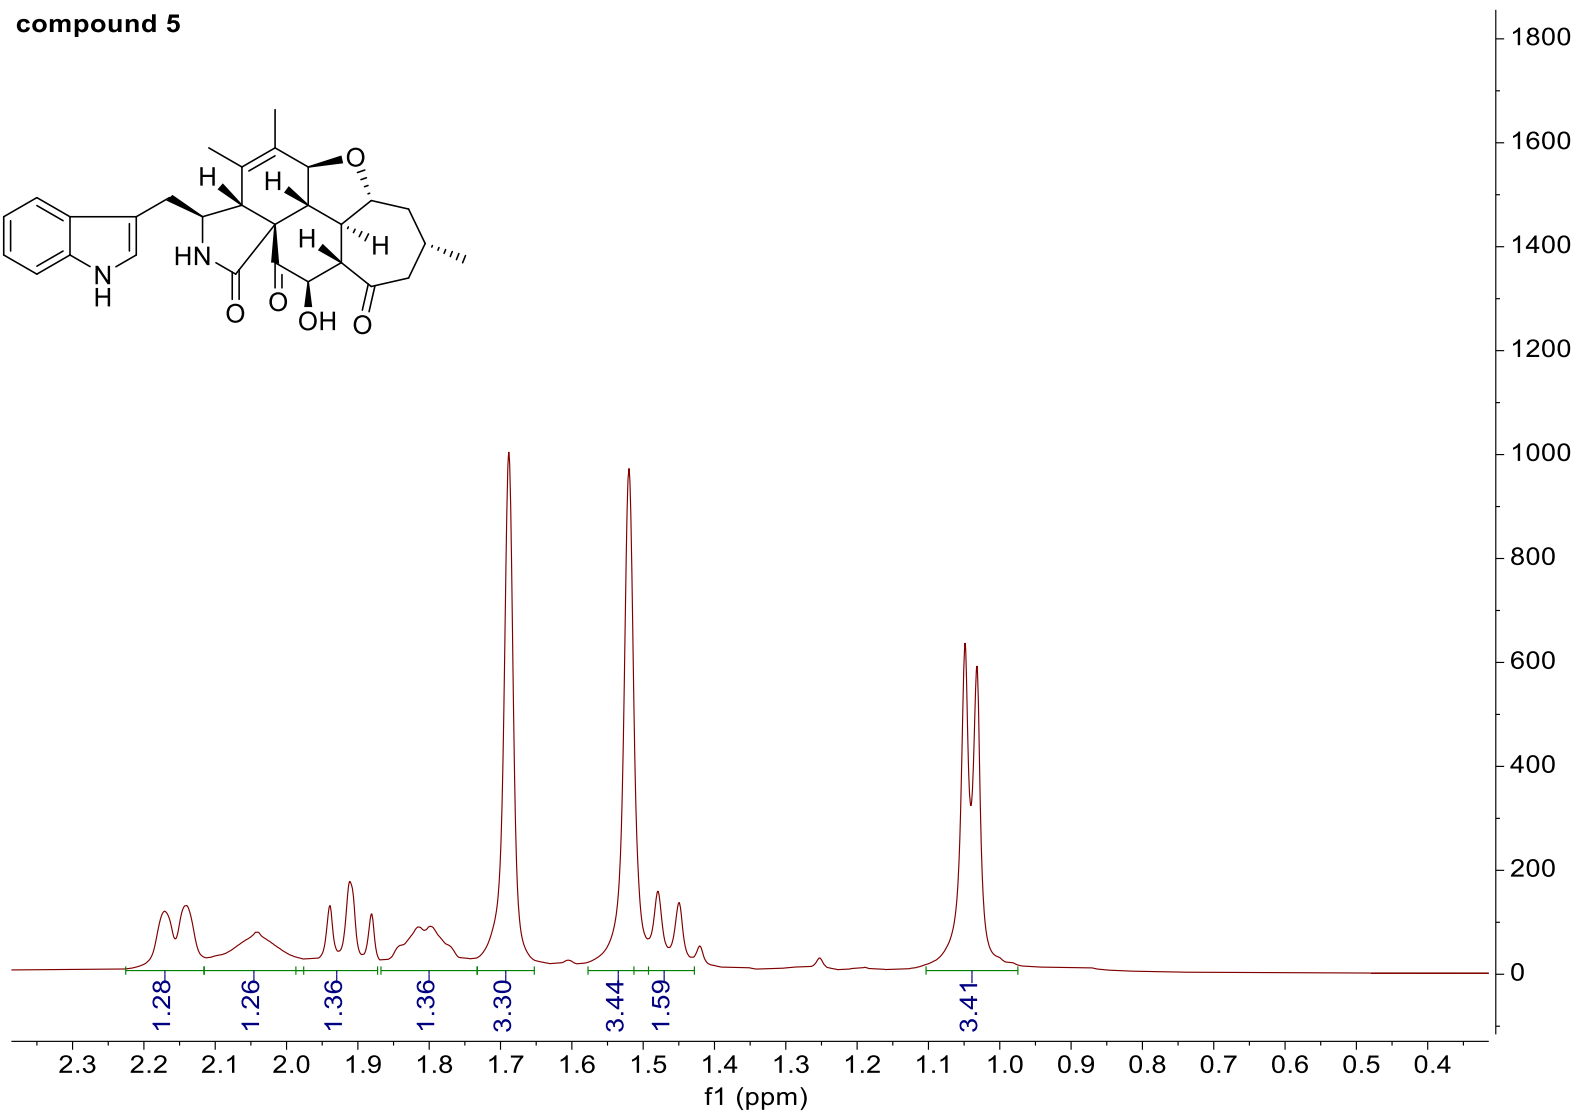

Fig. S61.  $^{13}\text{C}$  NMR (100 MHz,  $\text{CDCl}_3$ ) spectrum of **5**.

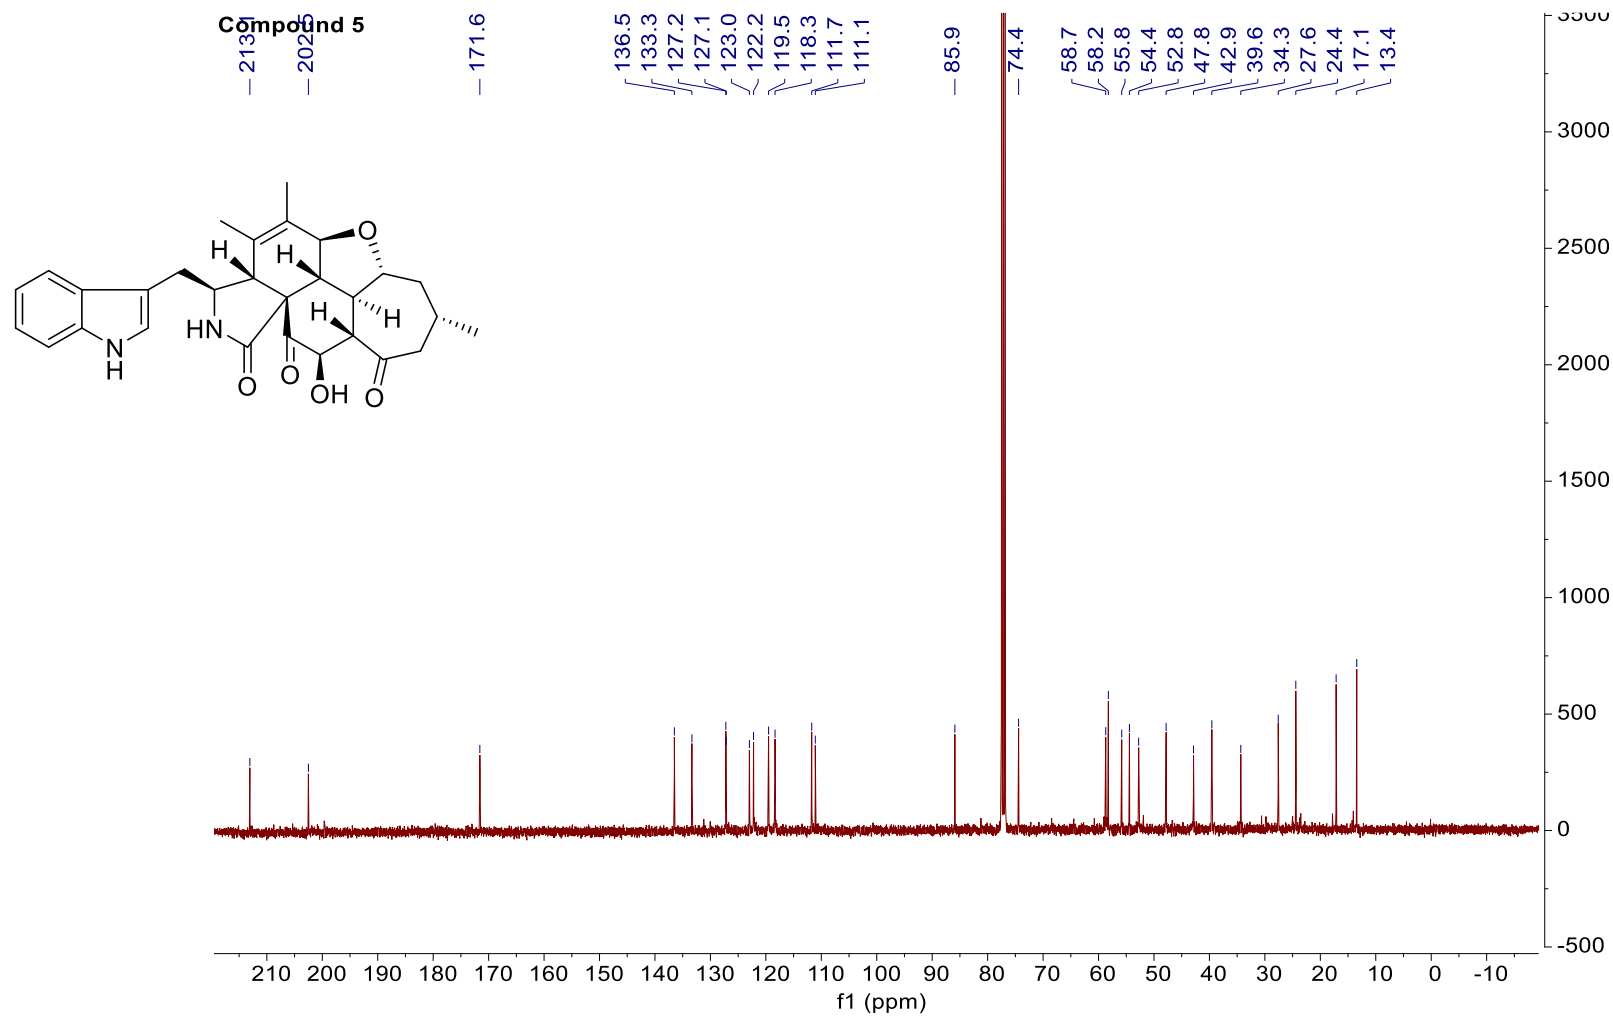

Fig. S62. DEPT-135 (100 MHz, CDCl<sub>3</sub>) spectrum of **5**.

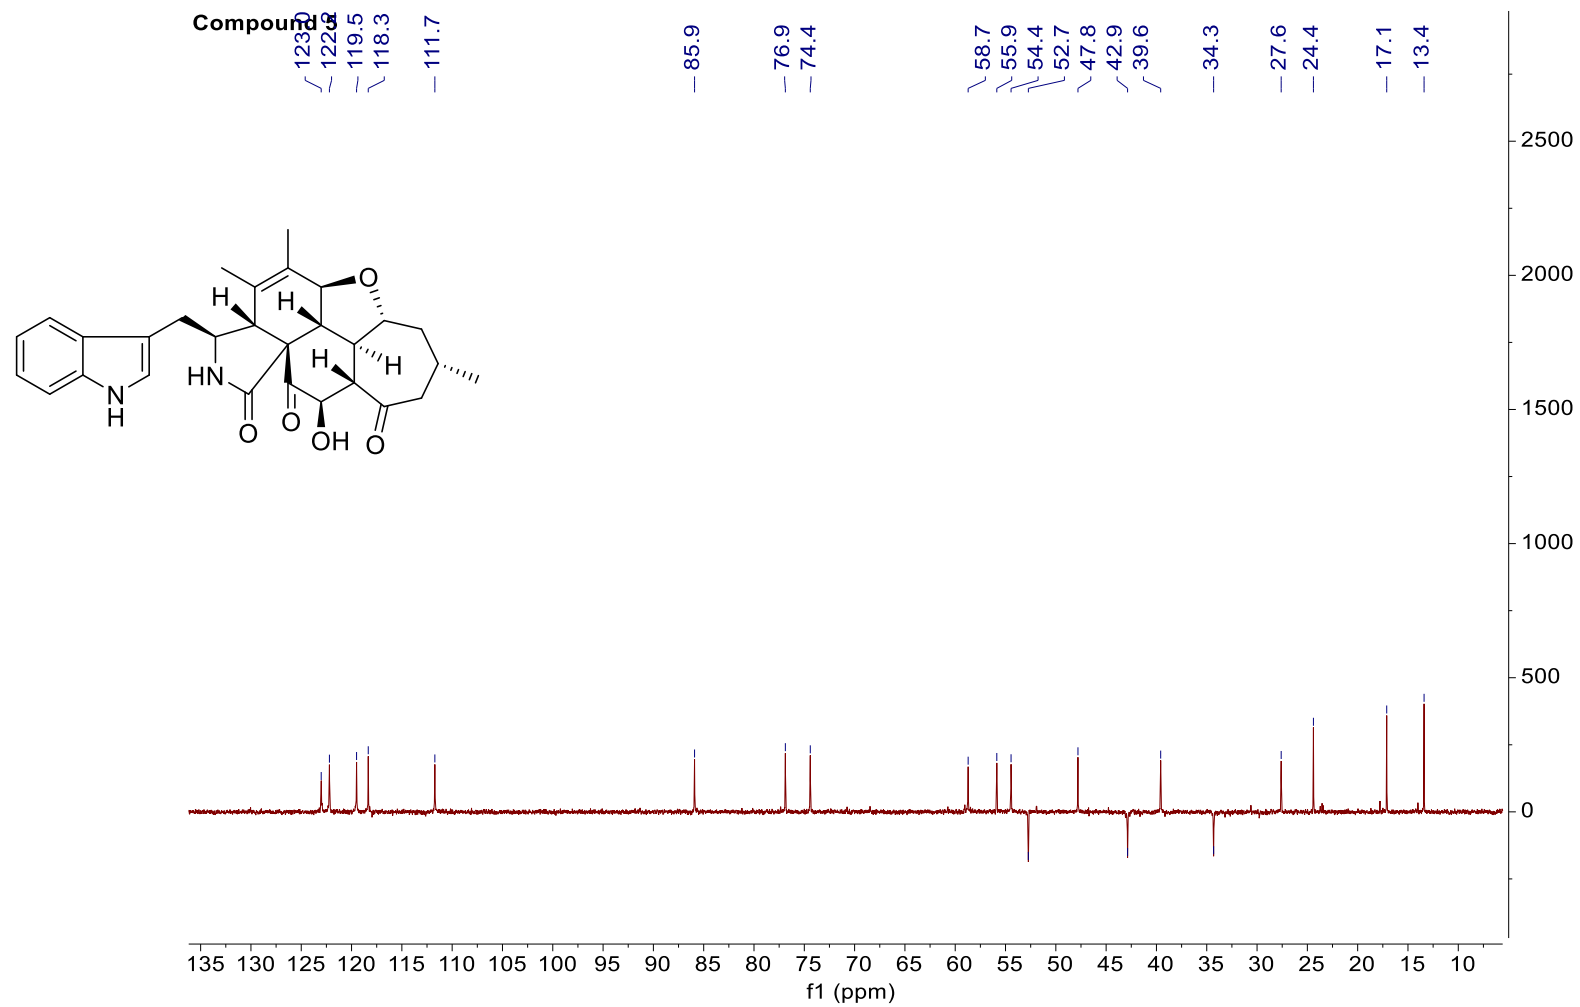

Fig. S63. HSQC spectrum of **5** in CDCl<sub>3</sub>.

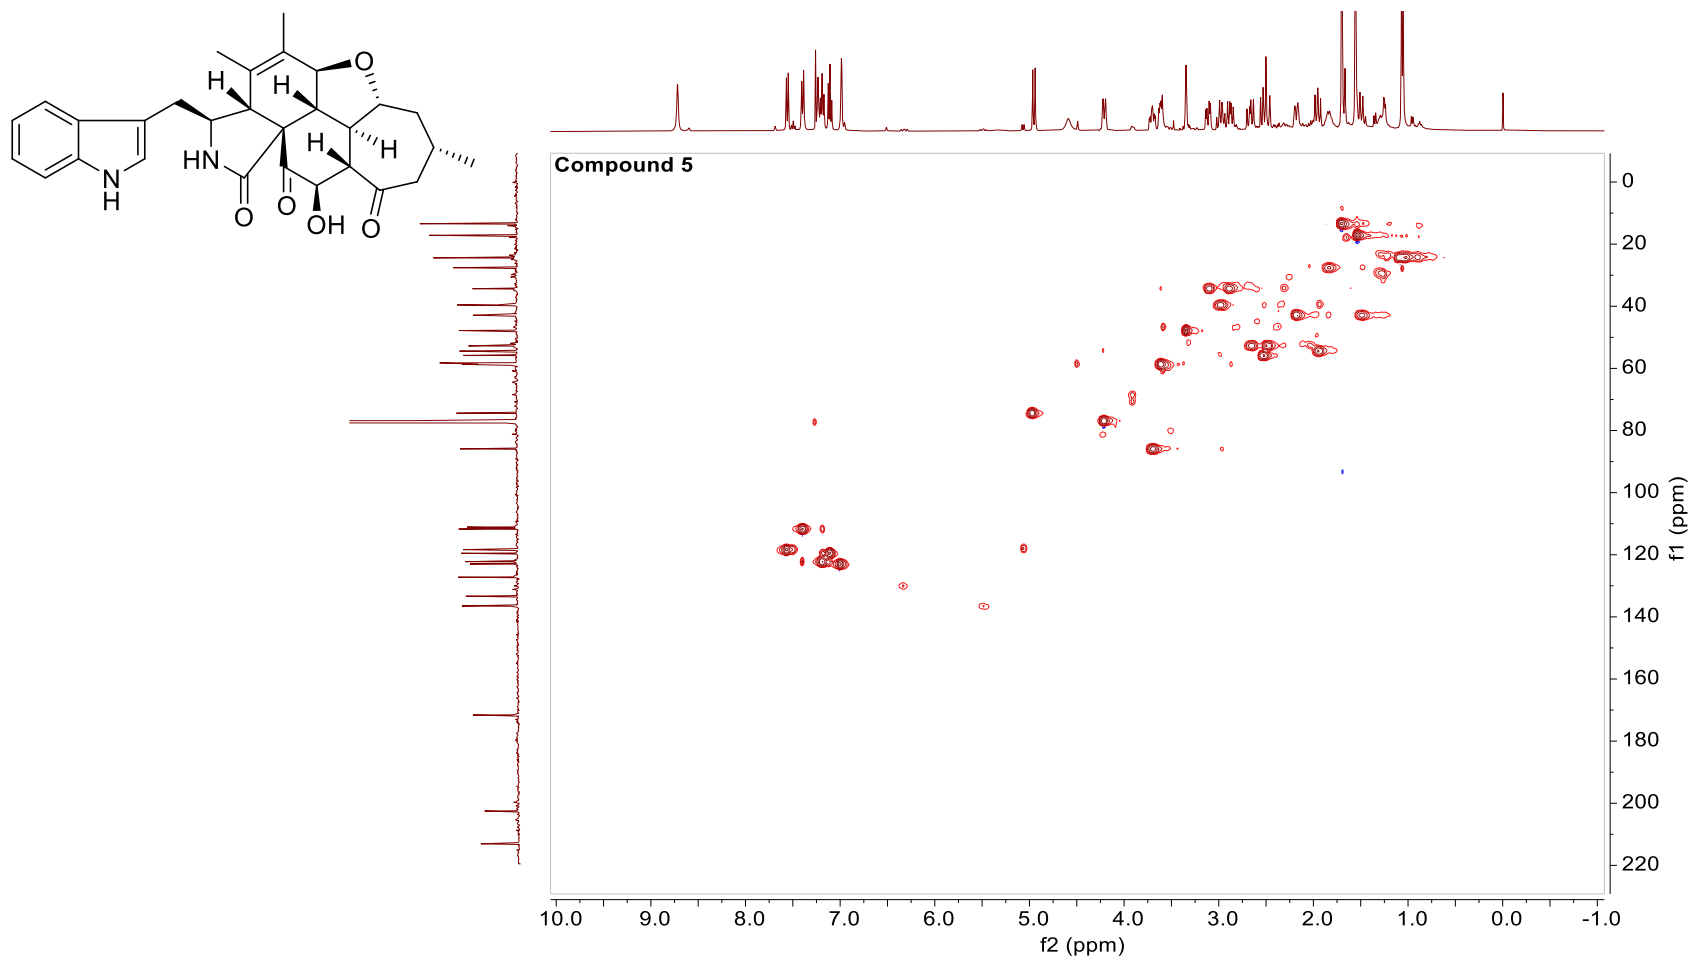

Fig. S64. HMBC spectrum of **5** in CDCl<sub>3</sub>.

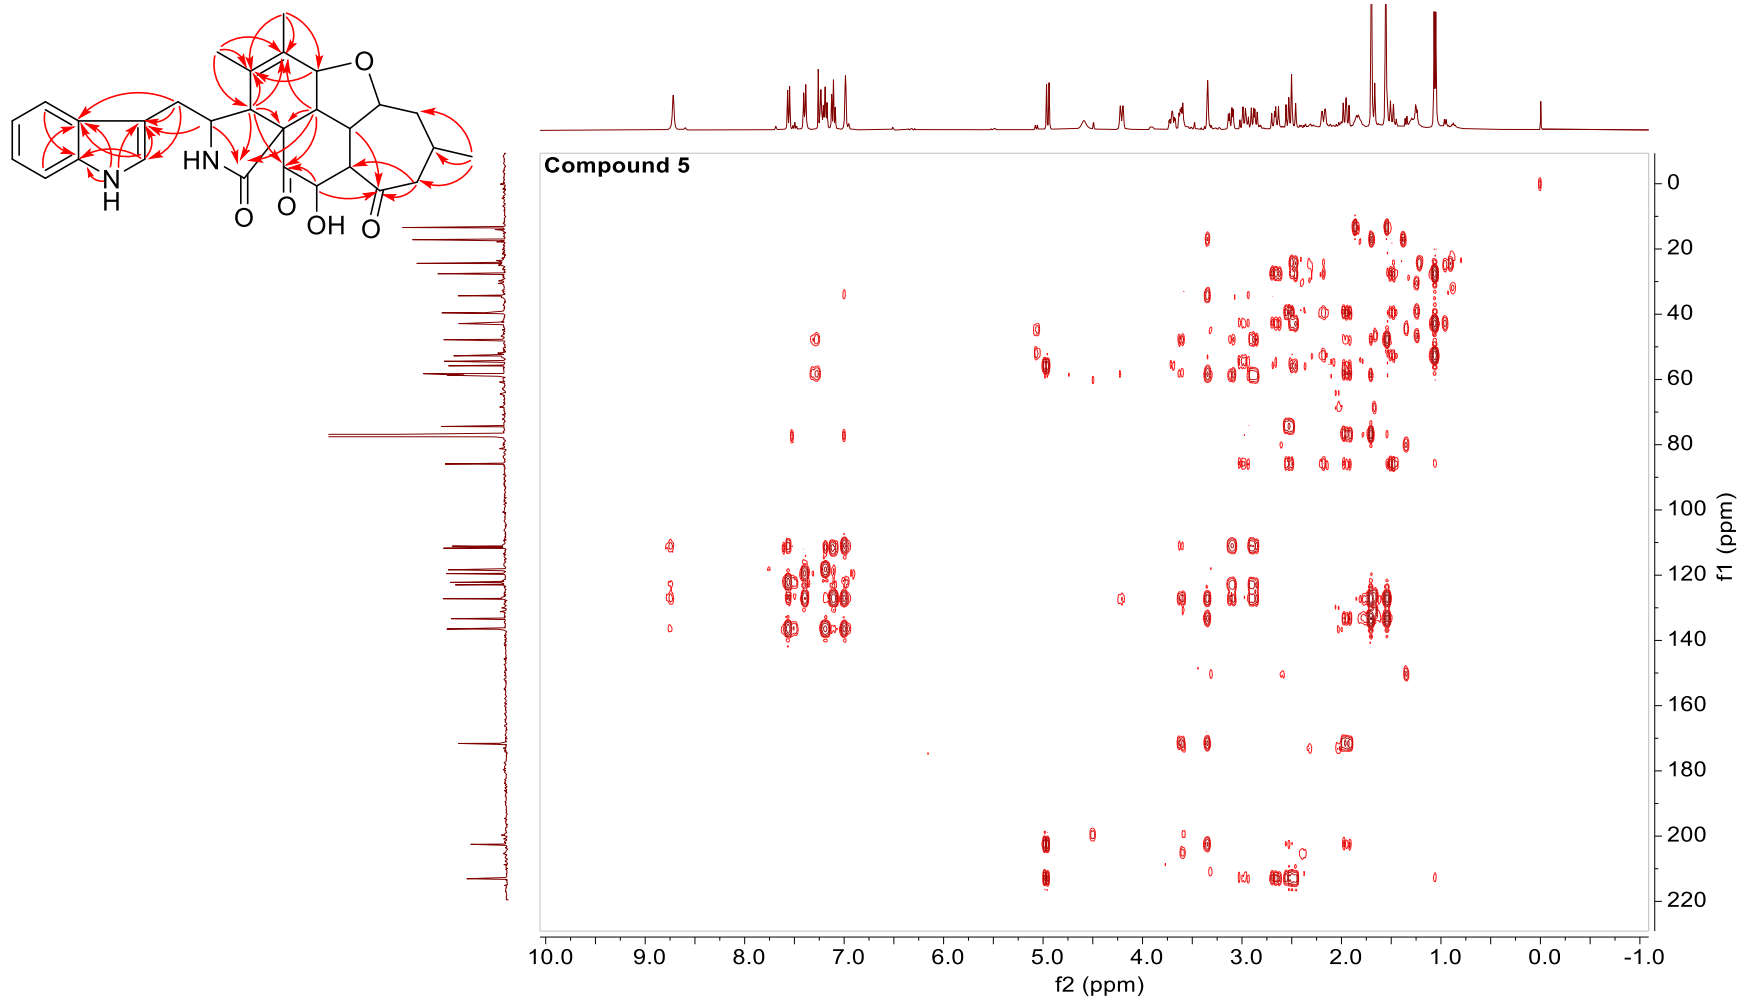

Fig. S65.  $^1\text{H}$ - $^1\text{H}$  COSY spectrum of **5** in  $\text{CDCl}_3$ .

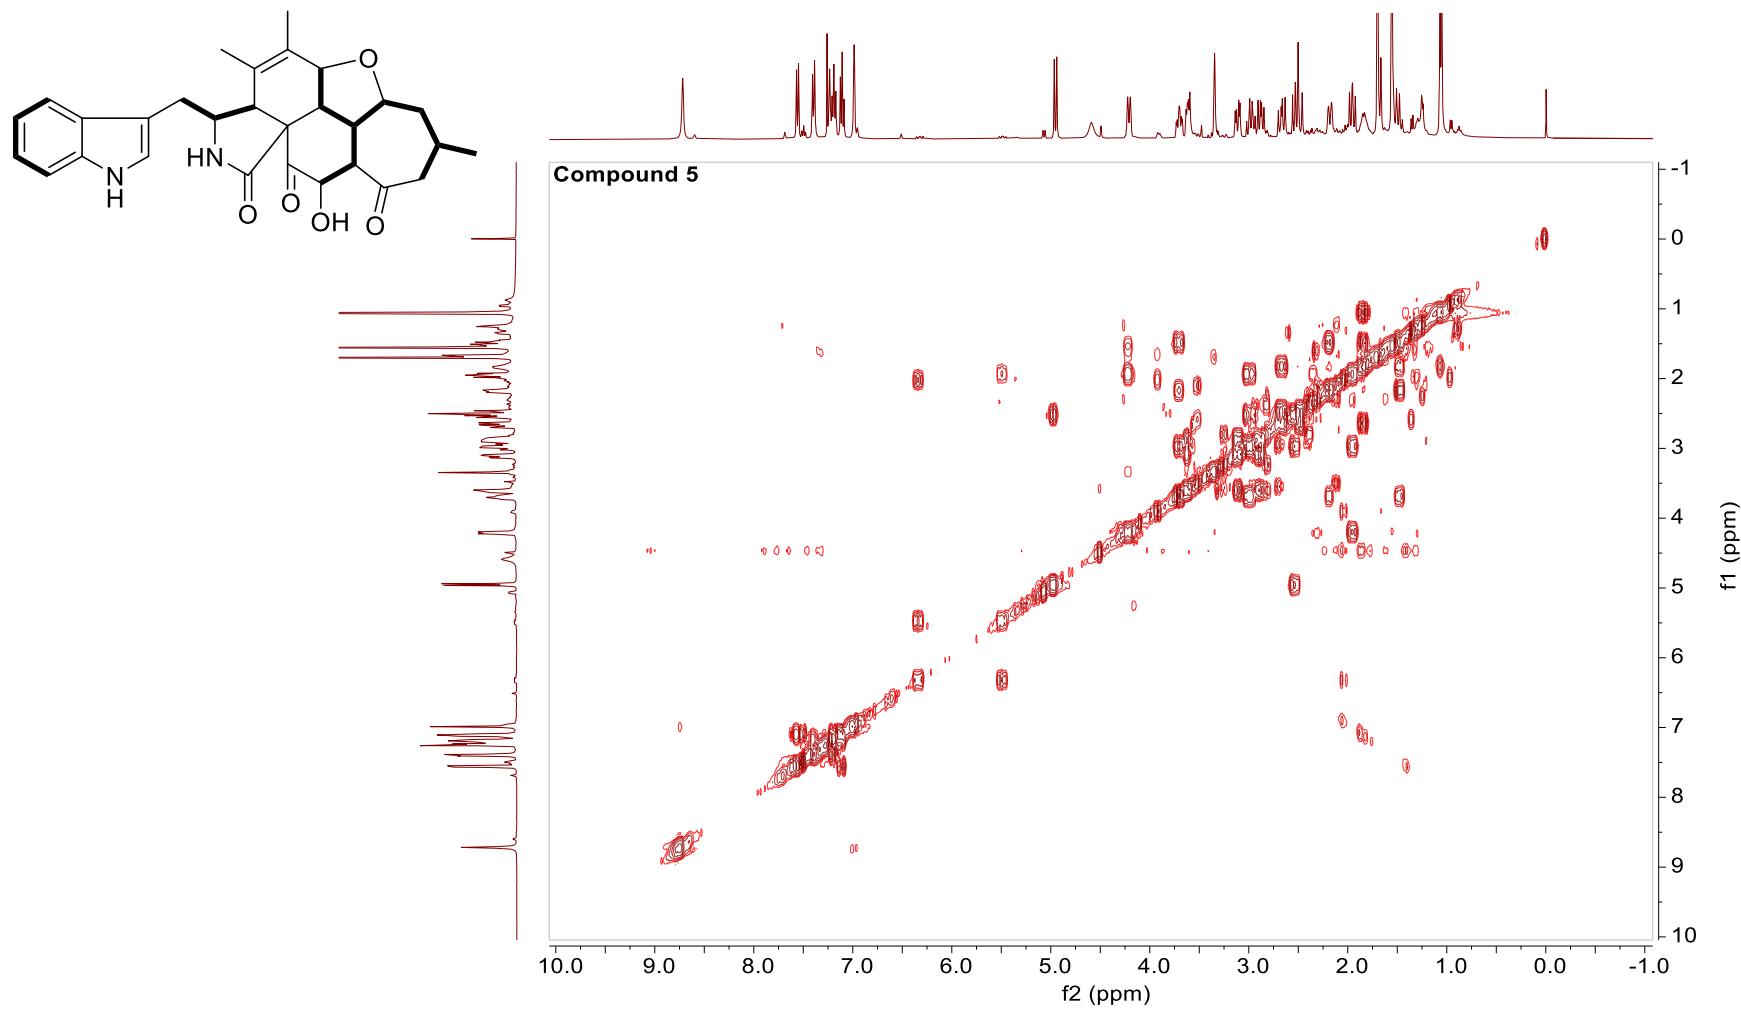

Fig. S66. NOESY spectrum of **5** in CDCl<sub>3</sub>.

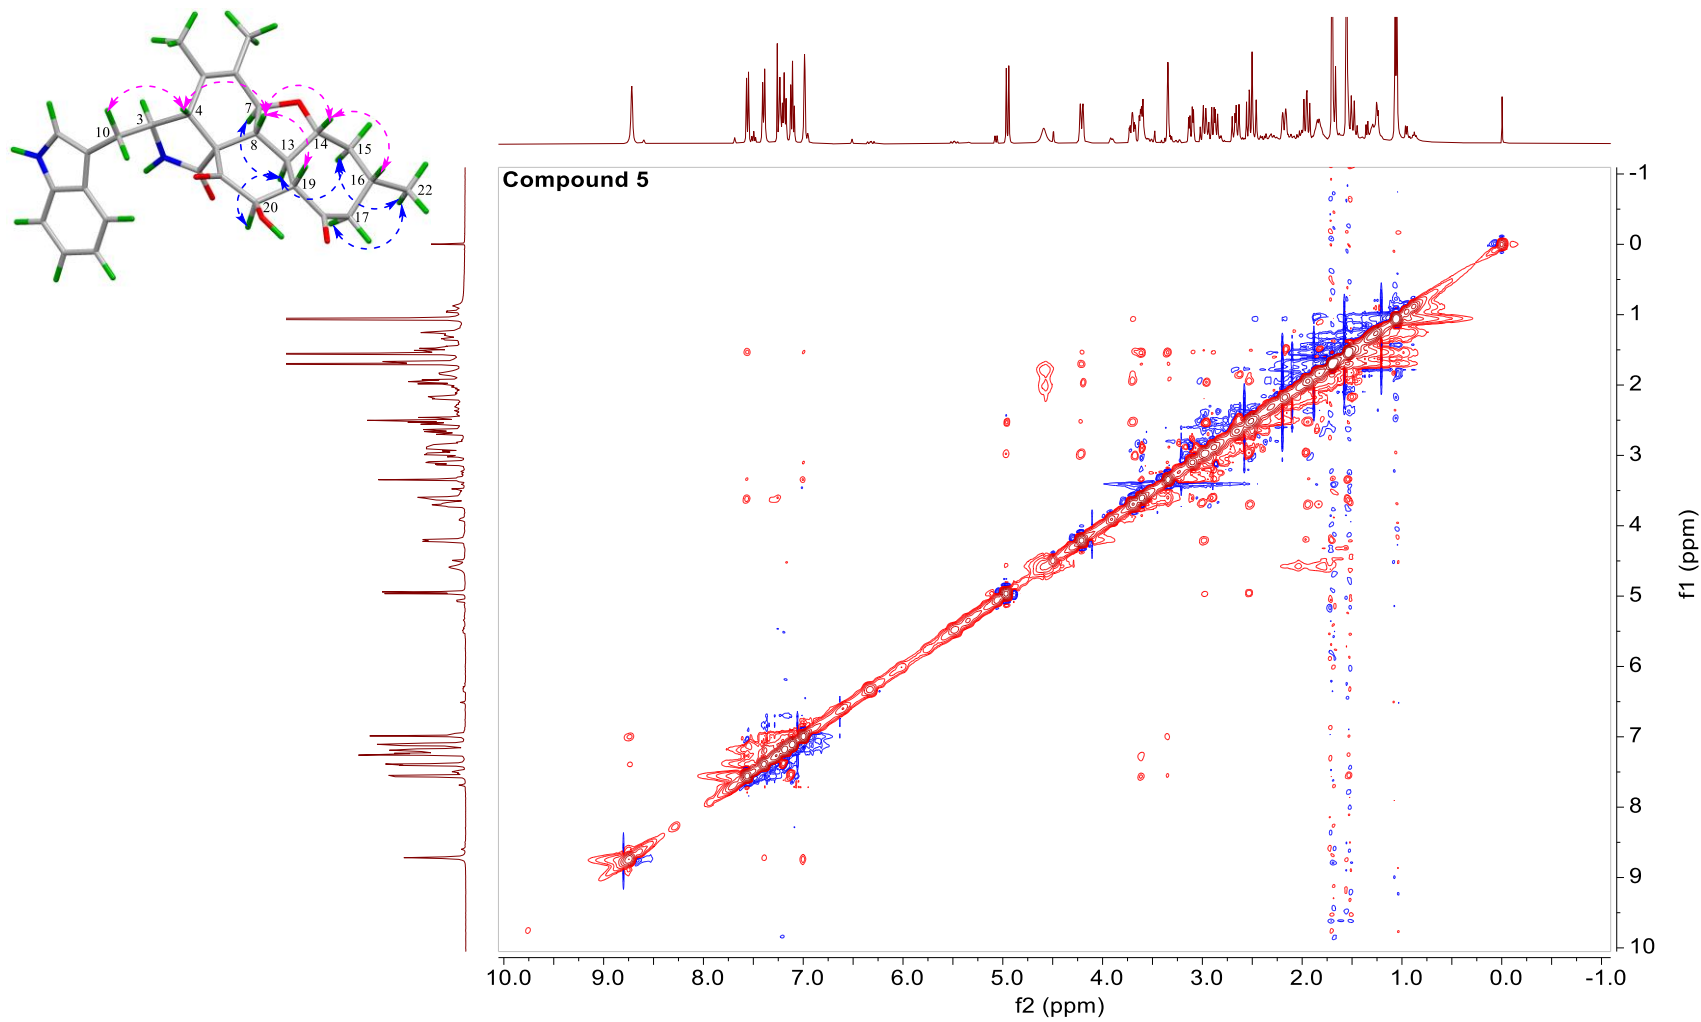



**Fig. S67.** HRESIMS (+) spectrum of **5**.

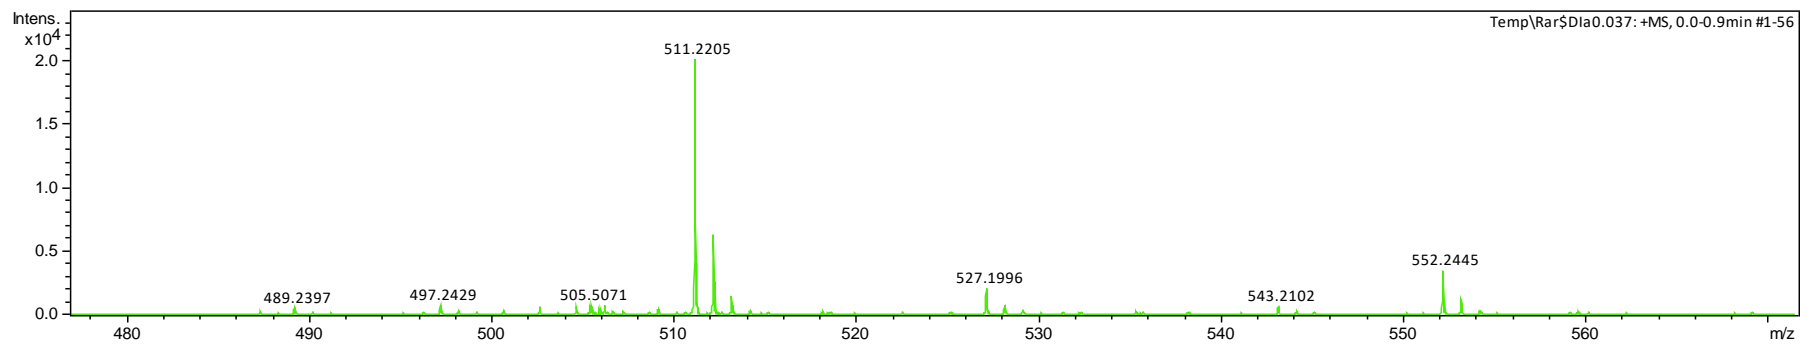

Fig. S68. UV spectrum of 5.

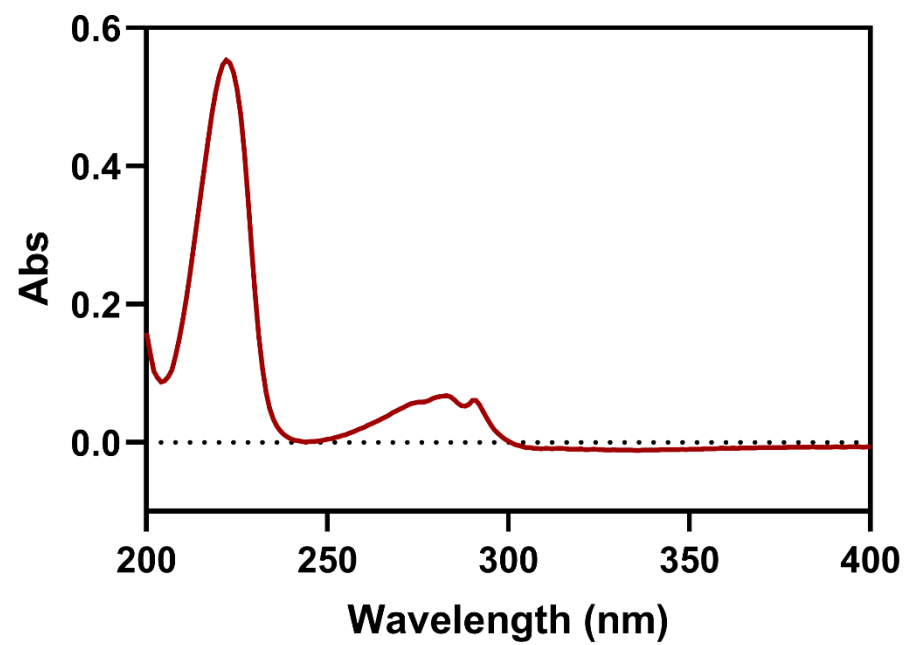

Fig. S69. IR spectrum of **5**.

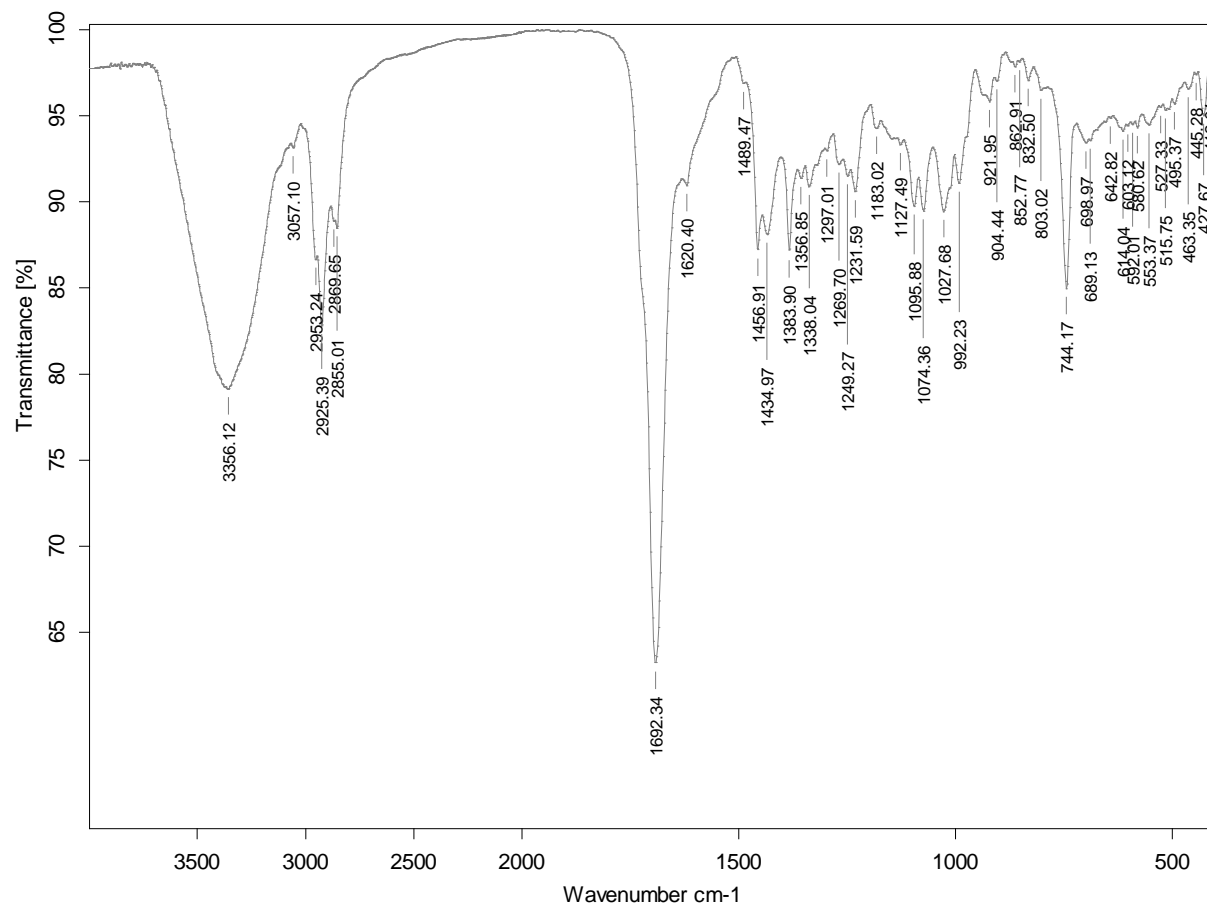

Fig. S70. ECD spectrum of **5**.

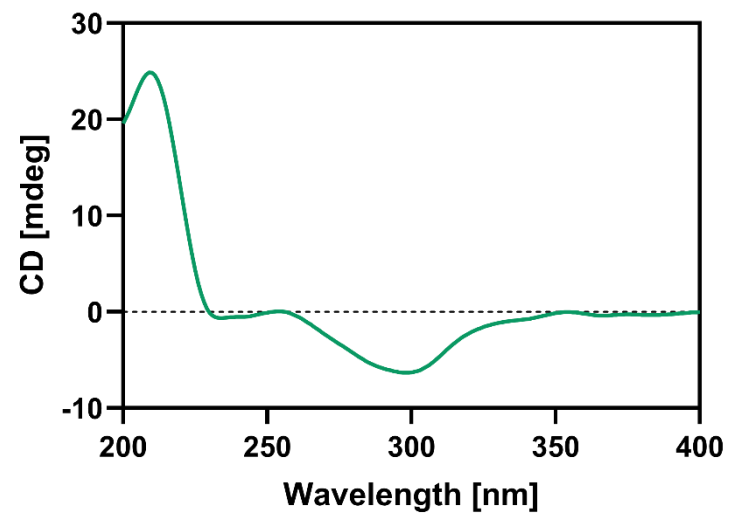

Fig. S71. <sup>1</sup>H NMR (400 MHz, CD<sub>3</sub>OD) spectrum of **6**.

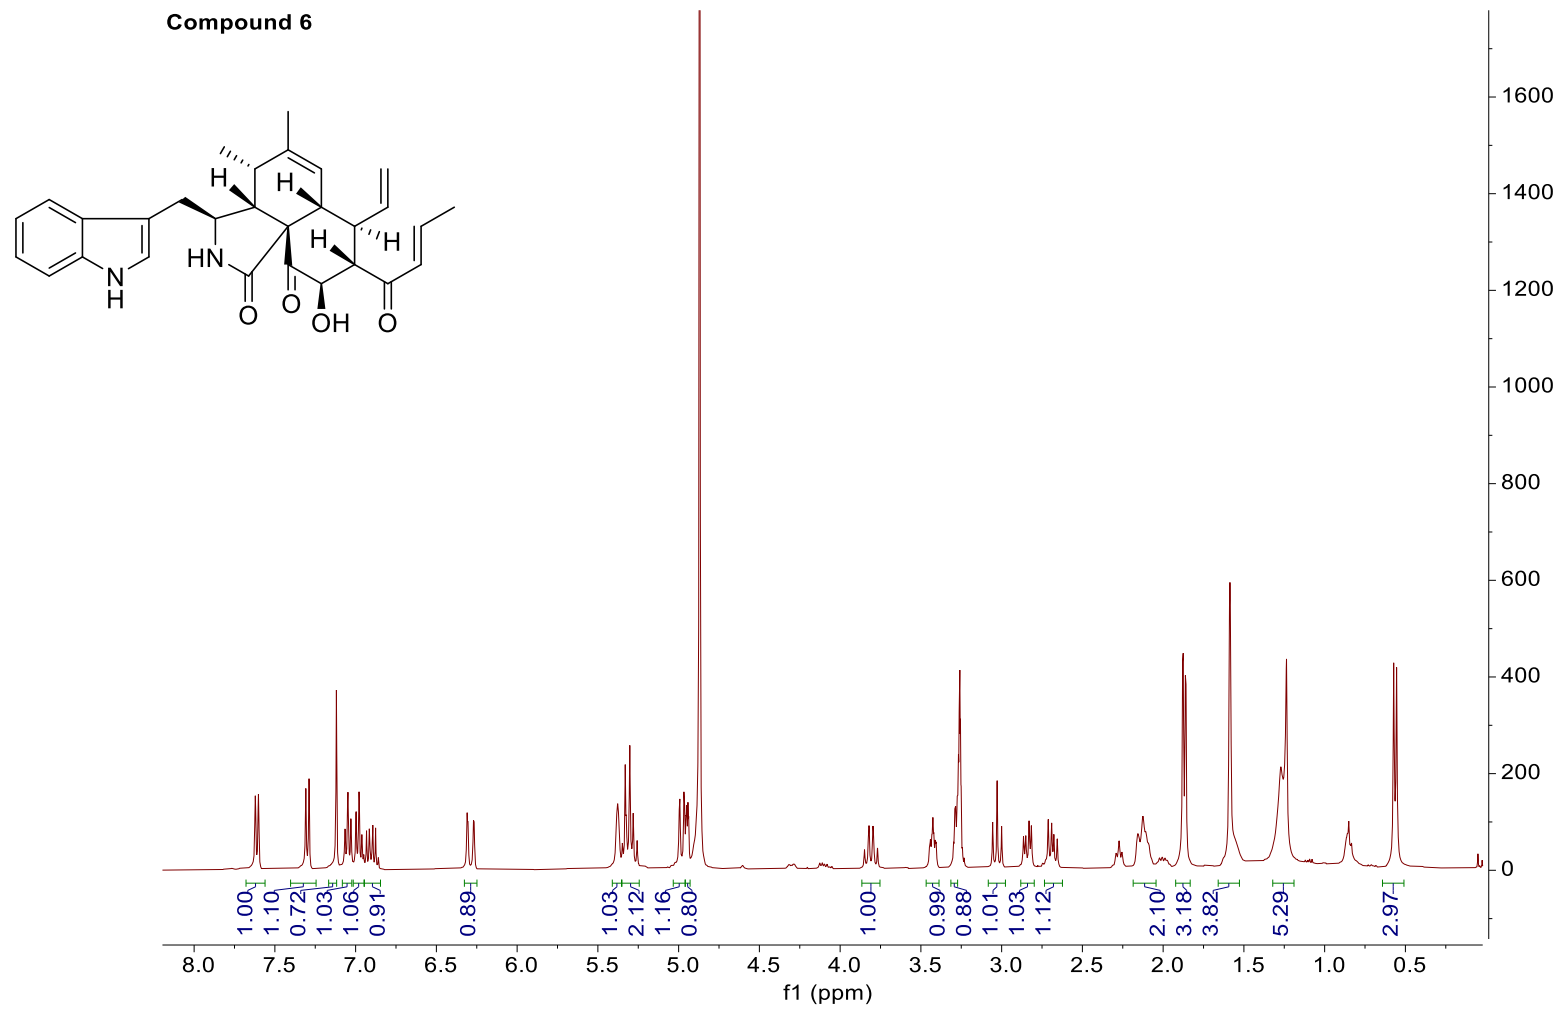

Fig. S72. Enlarged  $^1\text{H}$  NMR (400 MHz,  $\text{CD}_3\text{OD}$ ) spectrum of **6**.

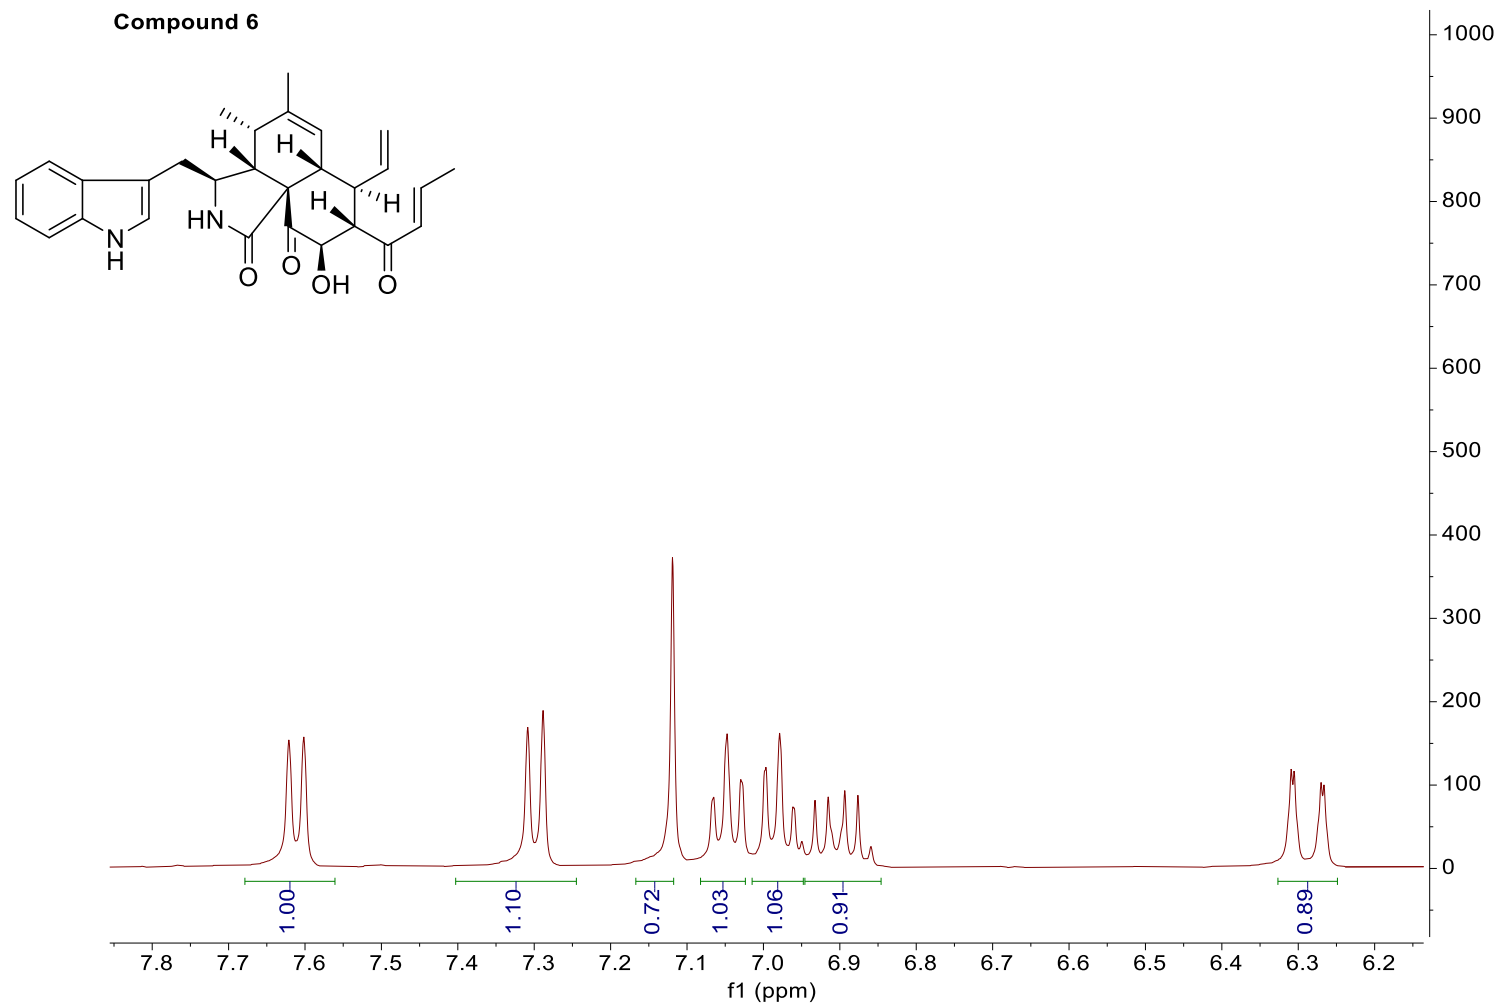

Compound 6

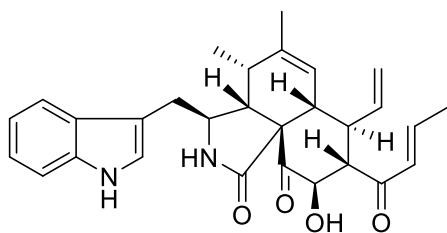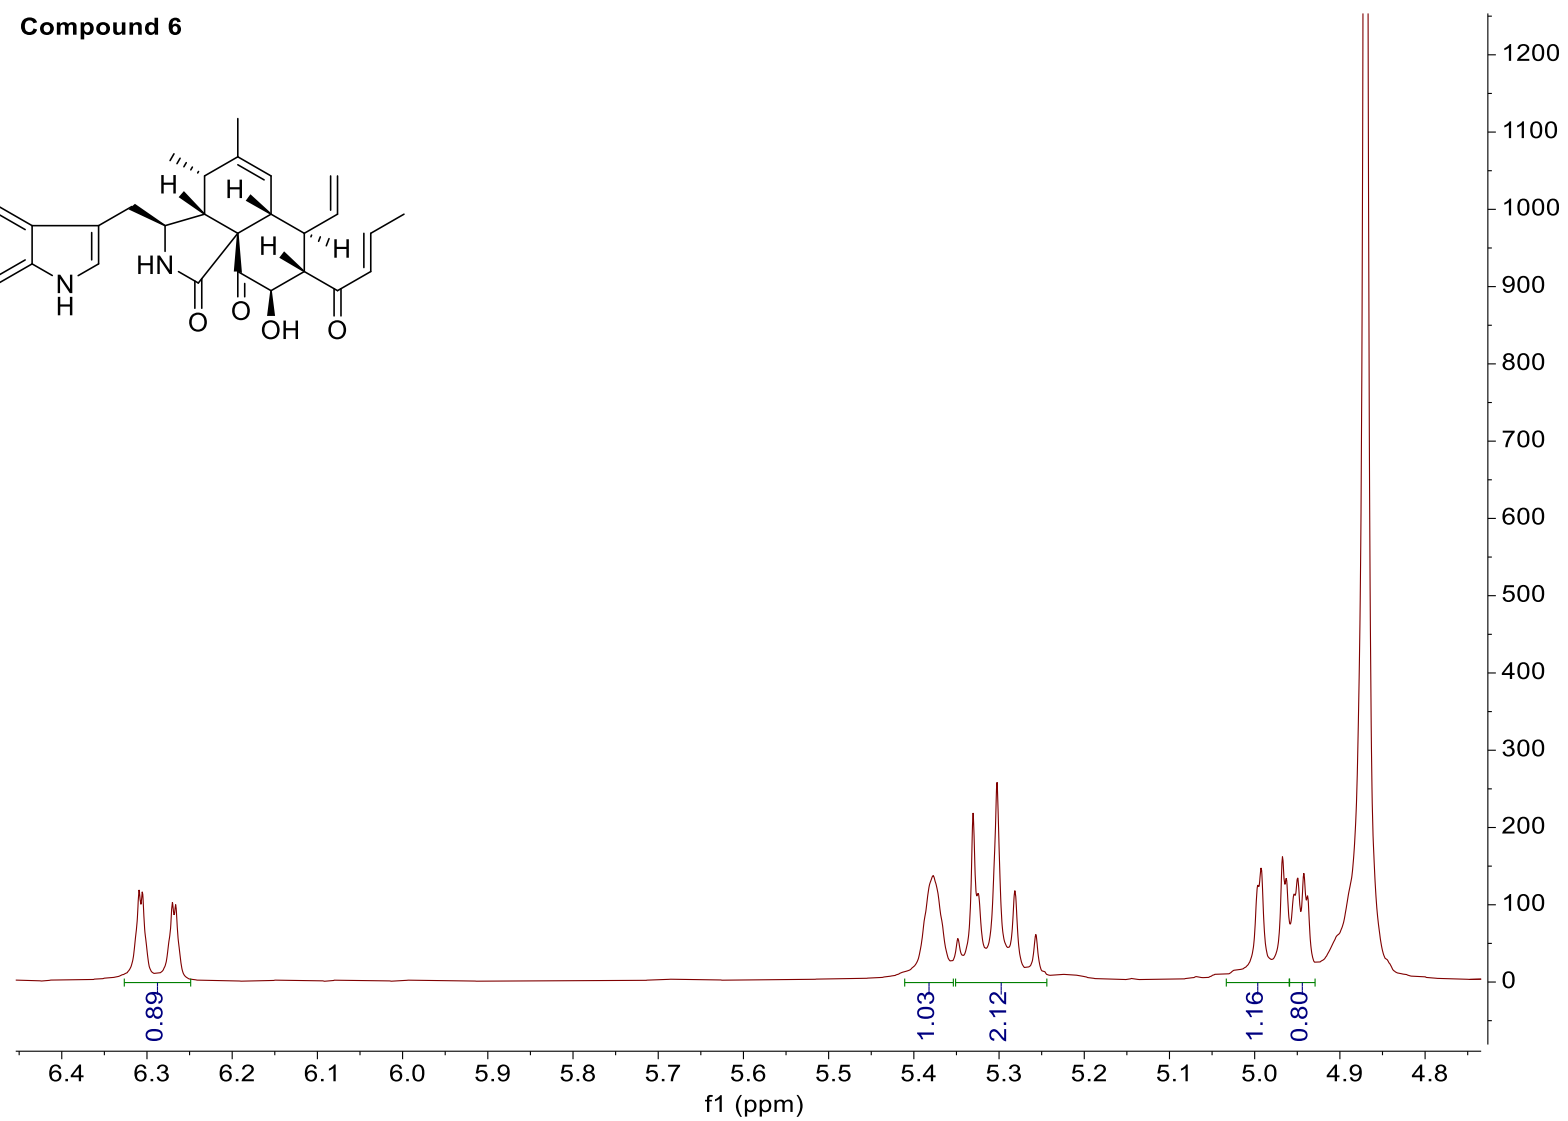

Compound 6

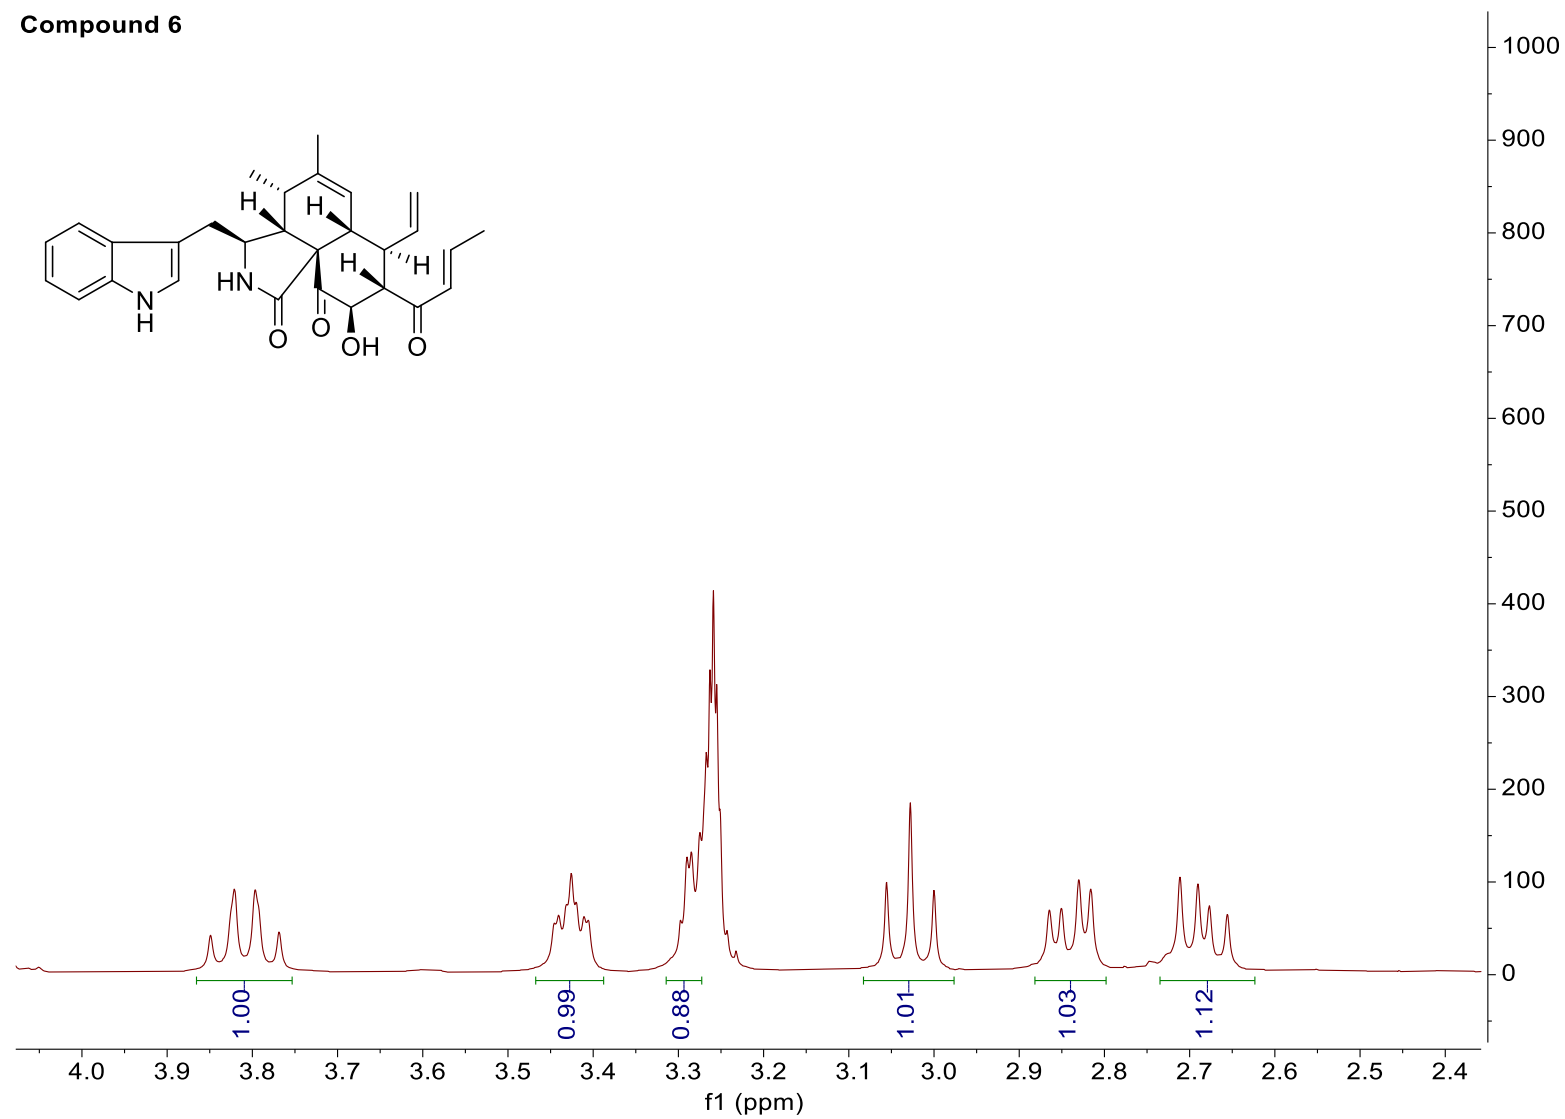



Compound 6

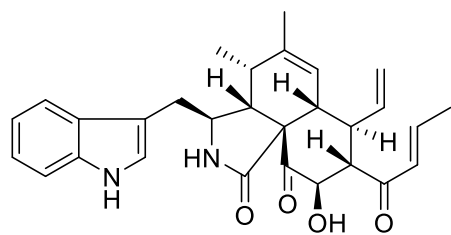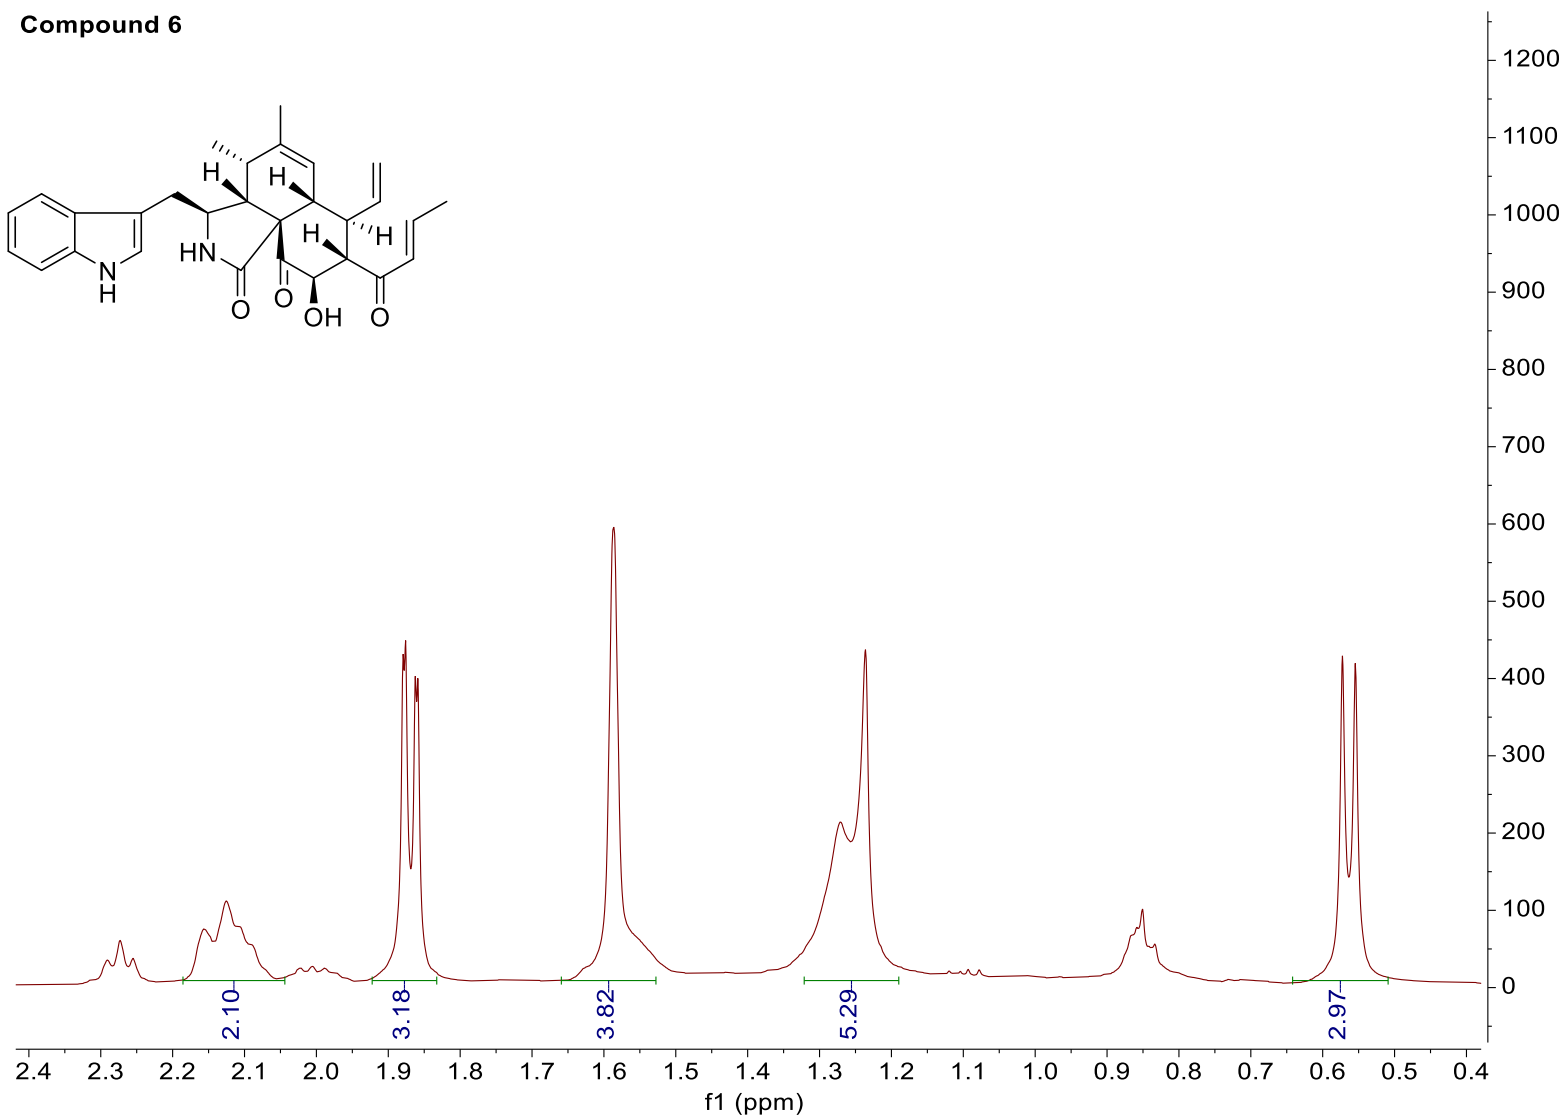

Fig. S73.  $^{13}\text{C}$  NMR (100 MHz,  $\text{CD}_3\text{OD}$ ) spectrum of **6**.

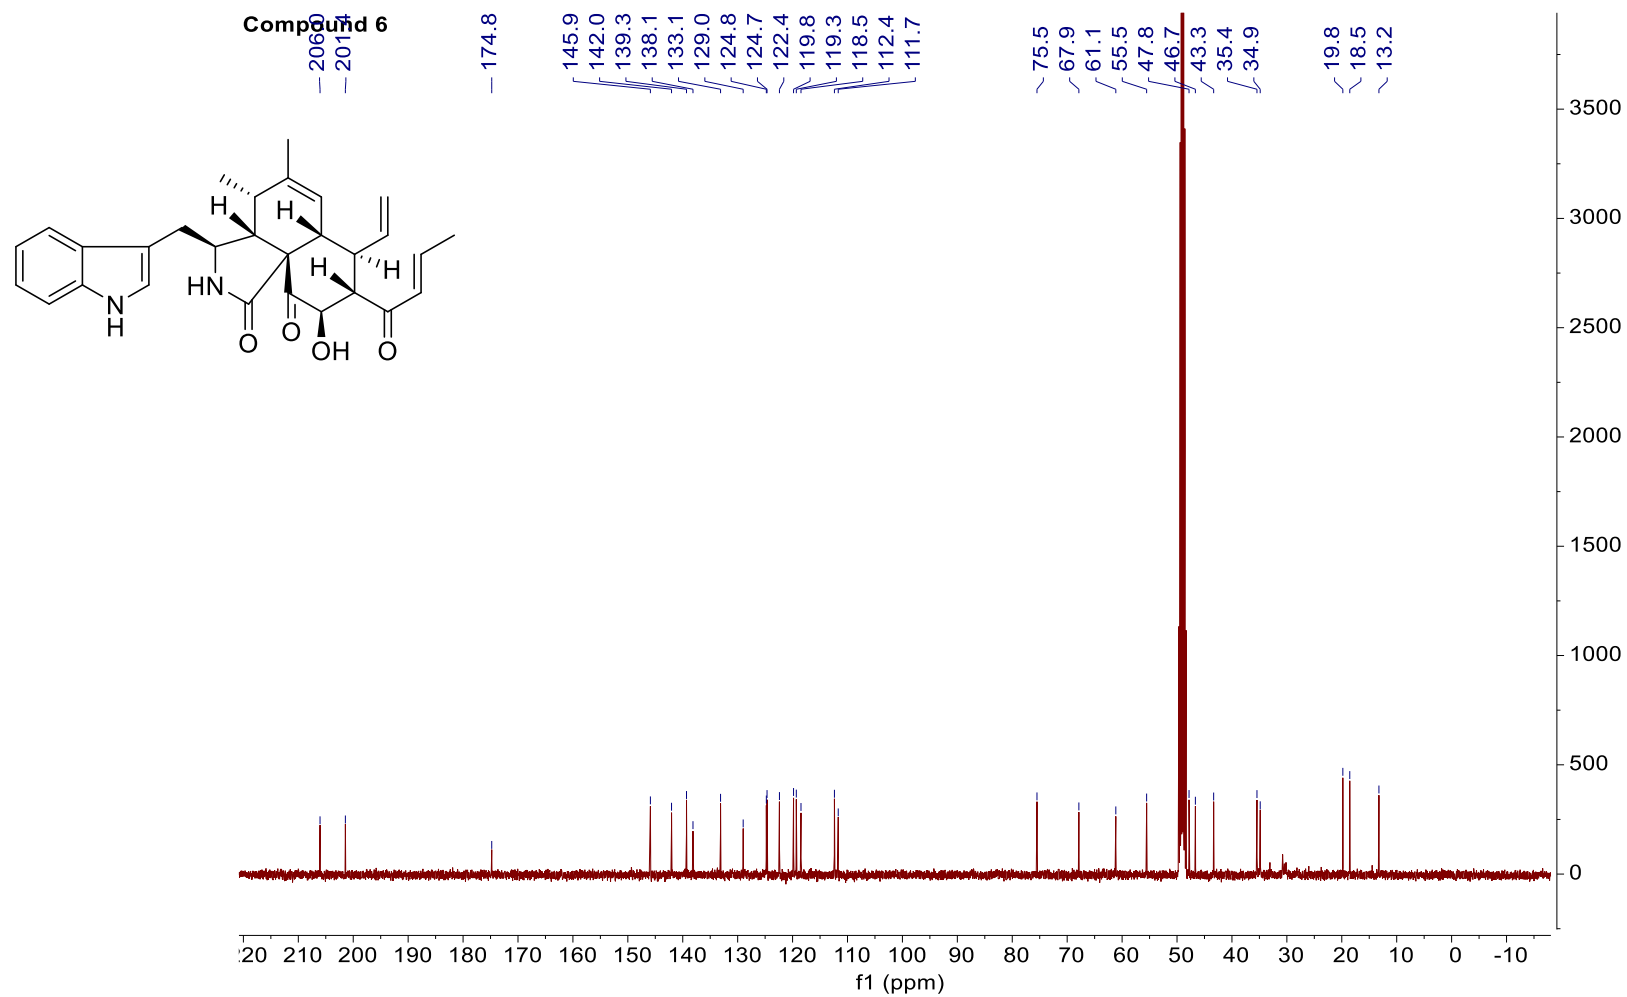

Fig. S74. DEPT-135 (100 MHz, CD<sub>3</sub>OD) spectrum of **6**.

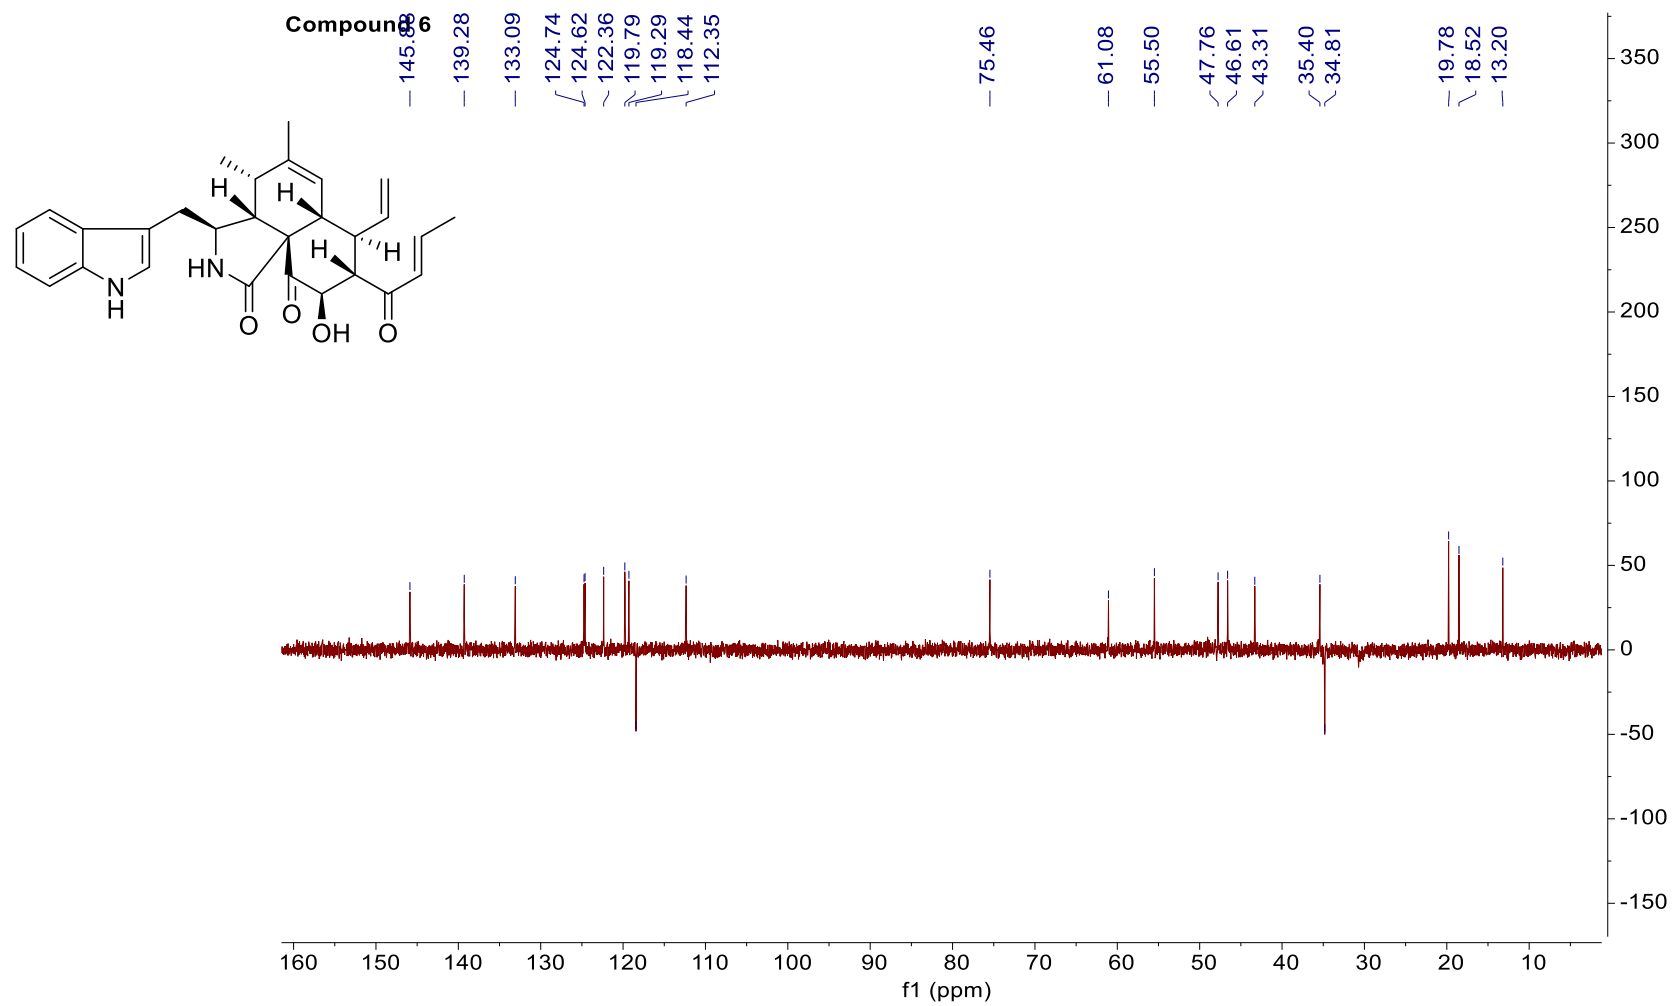

Fig. S75. HSQC spectrum of **6** in CD<sub>3</sub>OD.

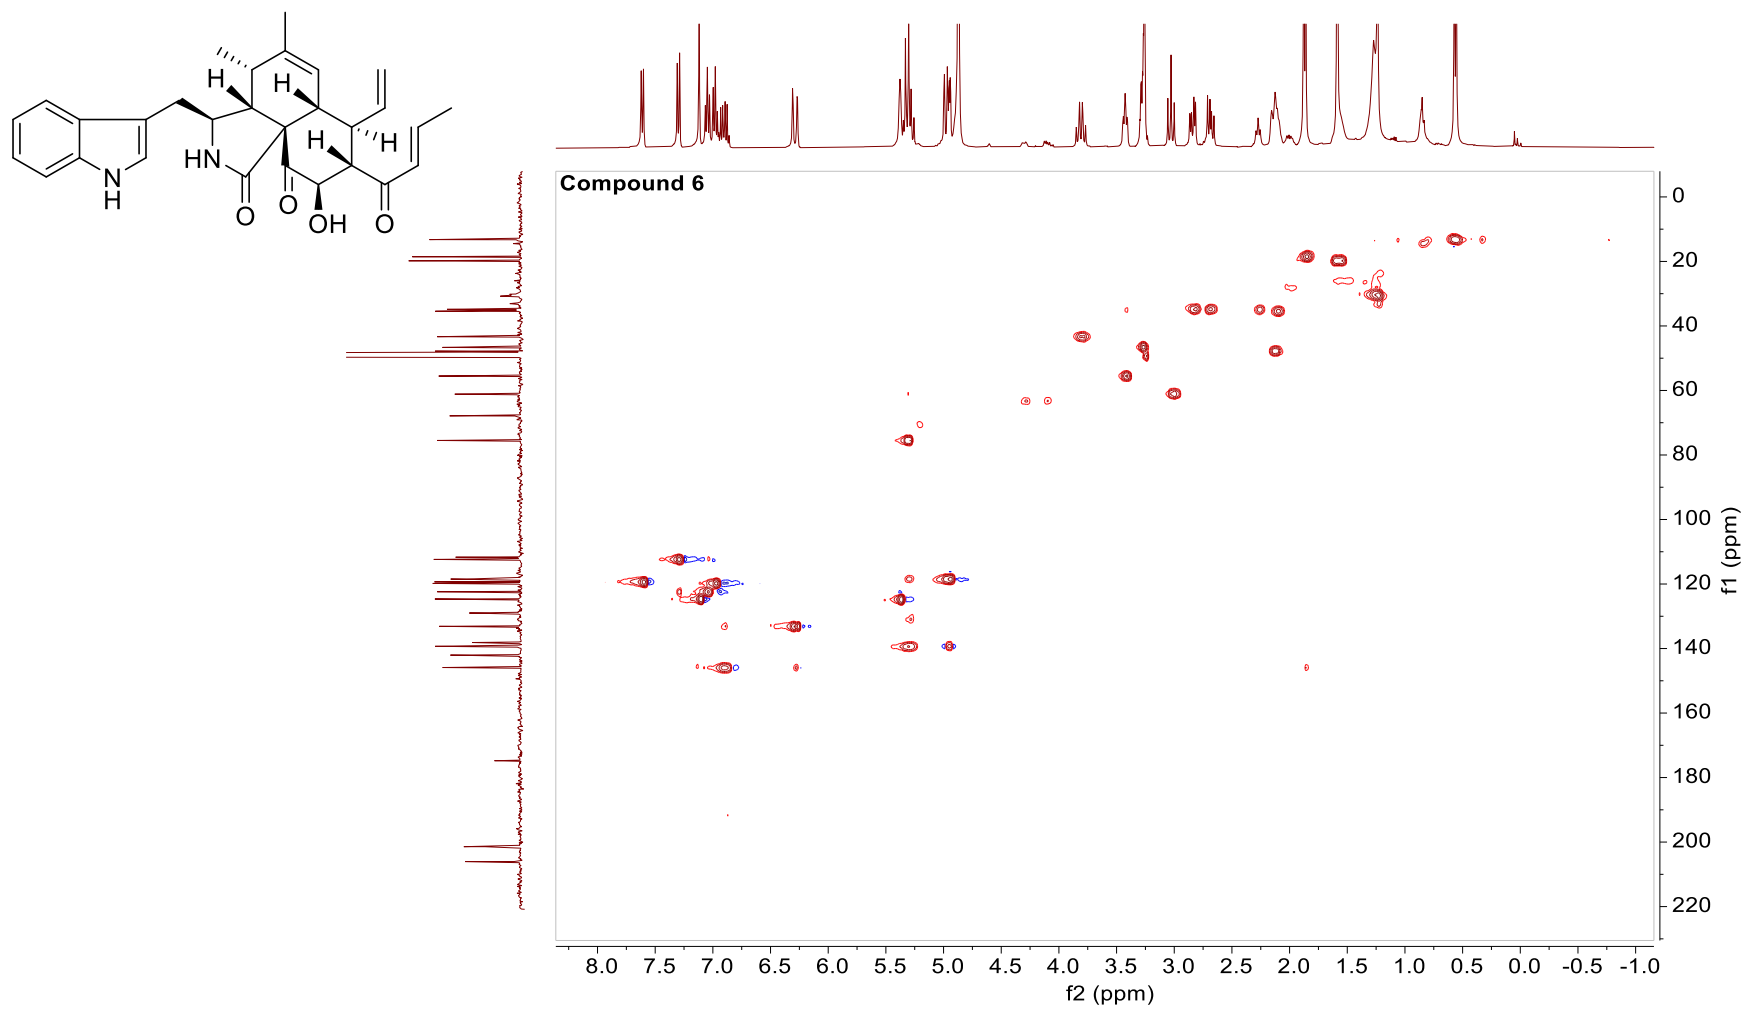

Fig. S76. HMBC spectrum of **6** in CD<sub>3</sub>OD.

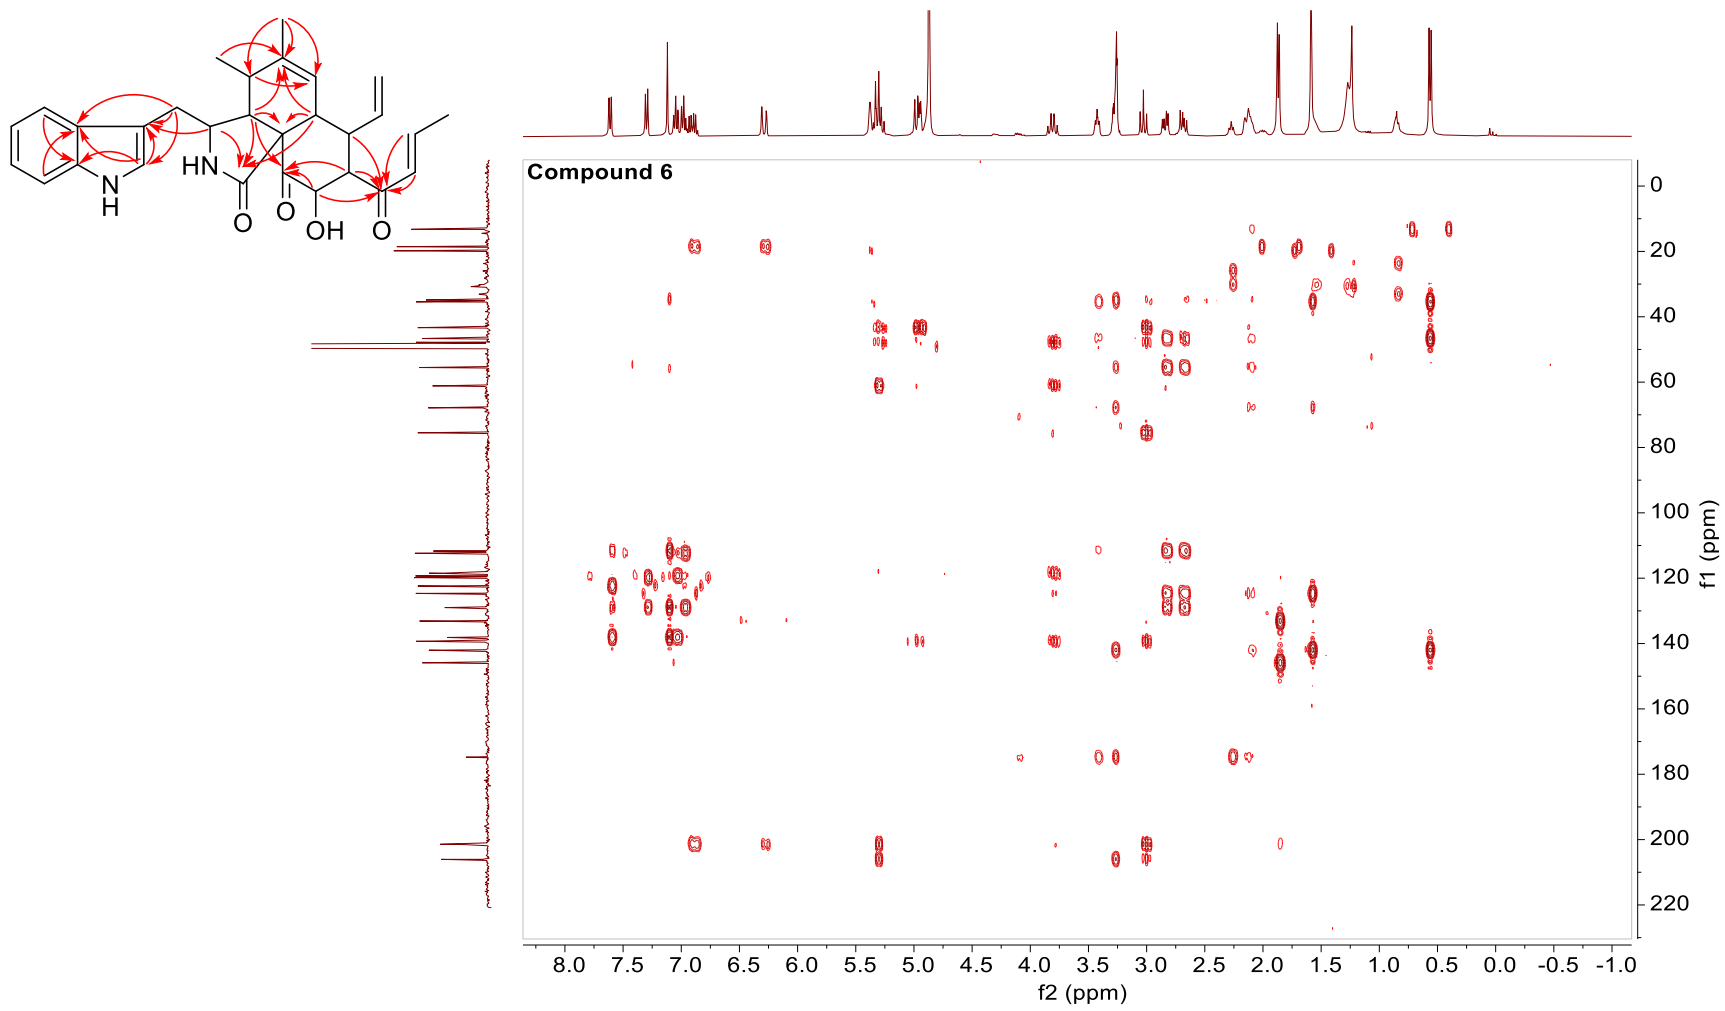

Fig. S77.  $^1\text{H}$ - $^1\text{H}$  COSY spectrum of **6** in  $\text{CD}_3\text{OD}$ .

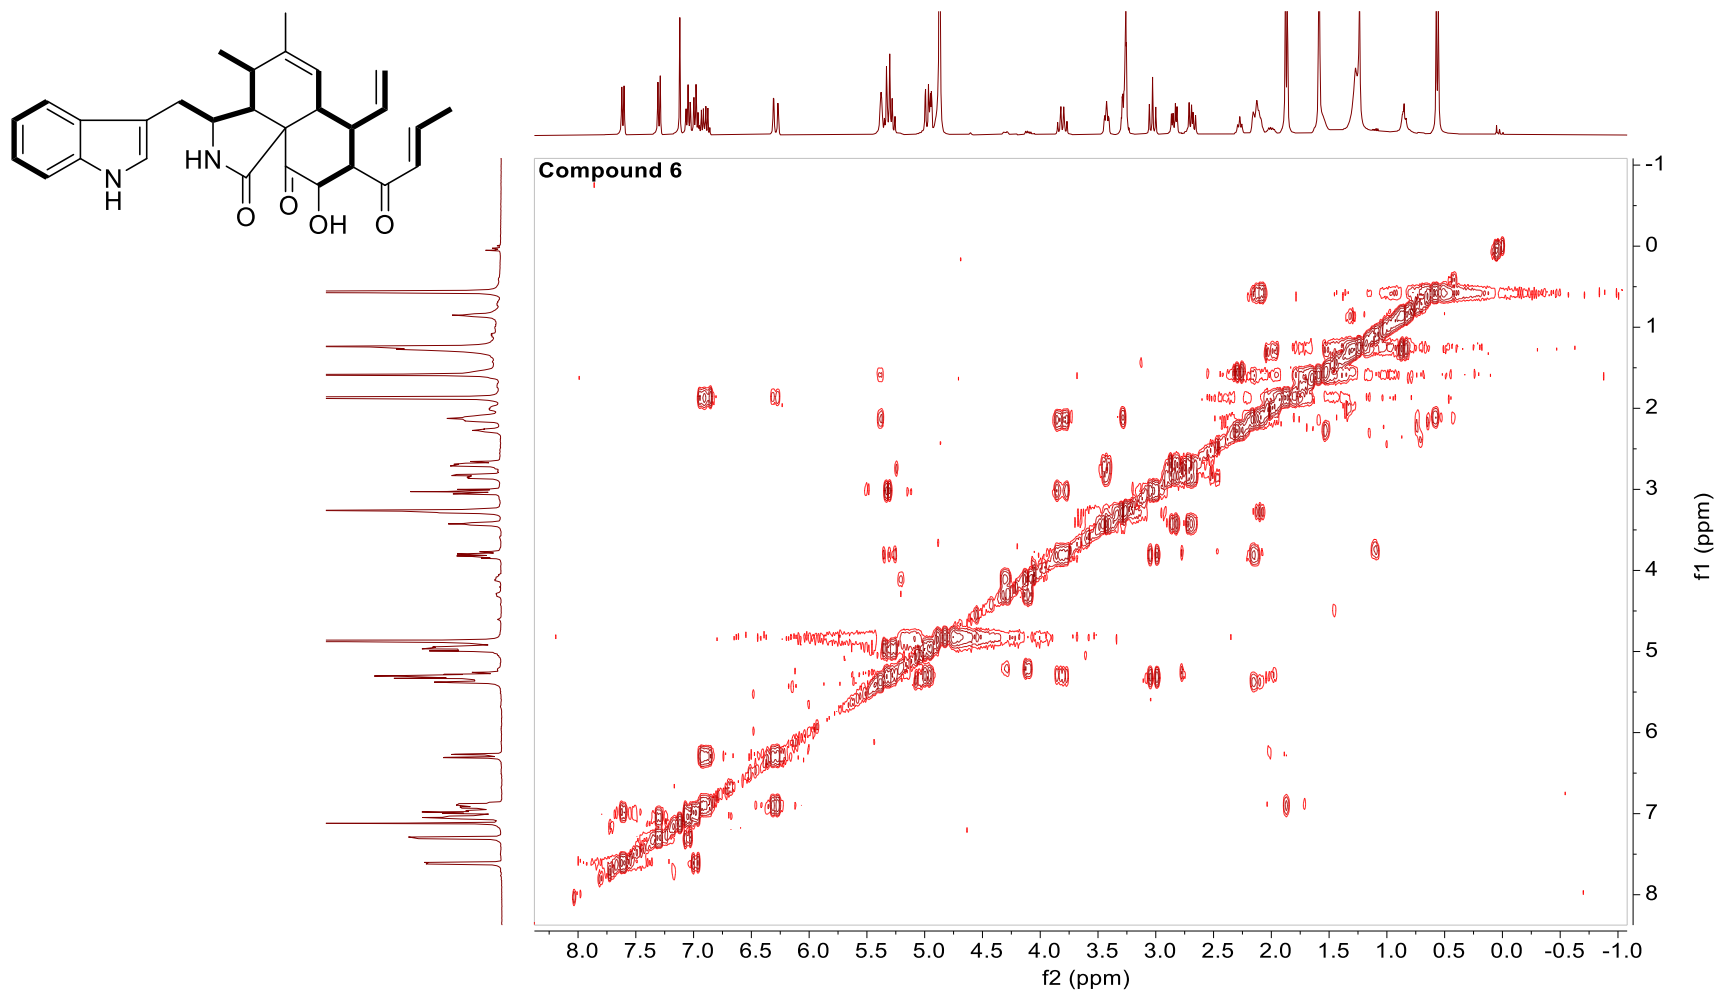

Fig. S78. NOESY spectrum of **6** in CD<sub>3</sub>OD.

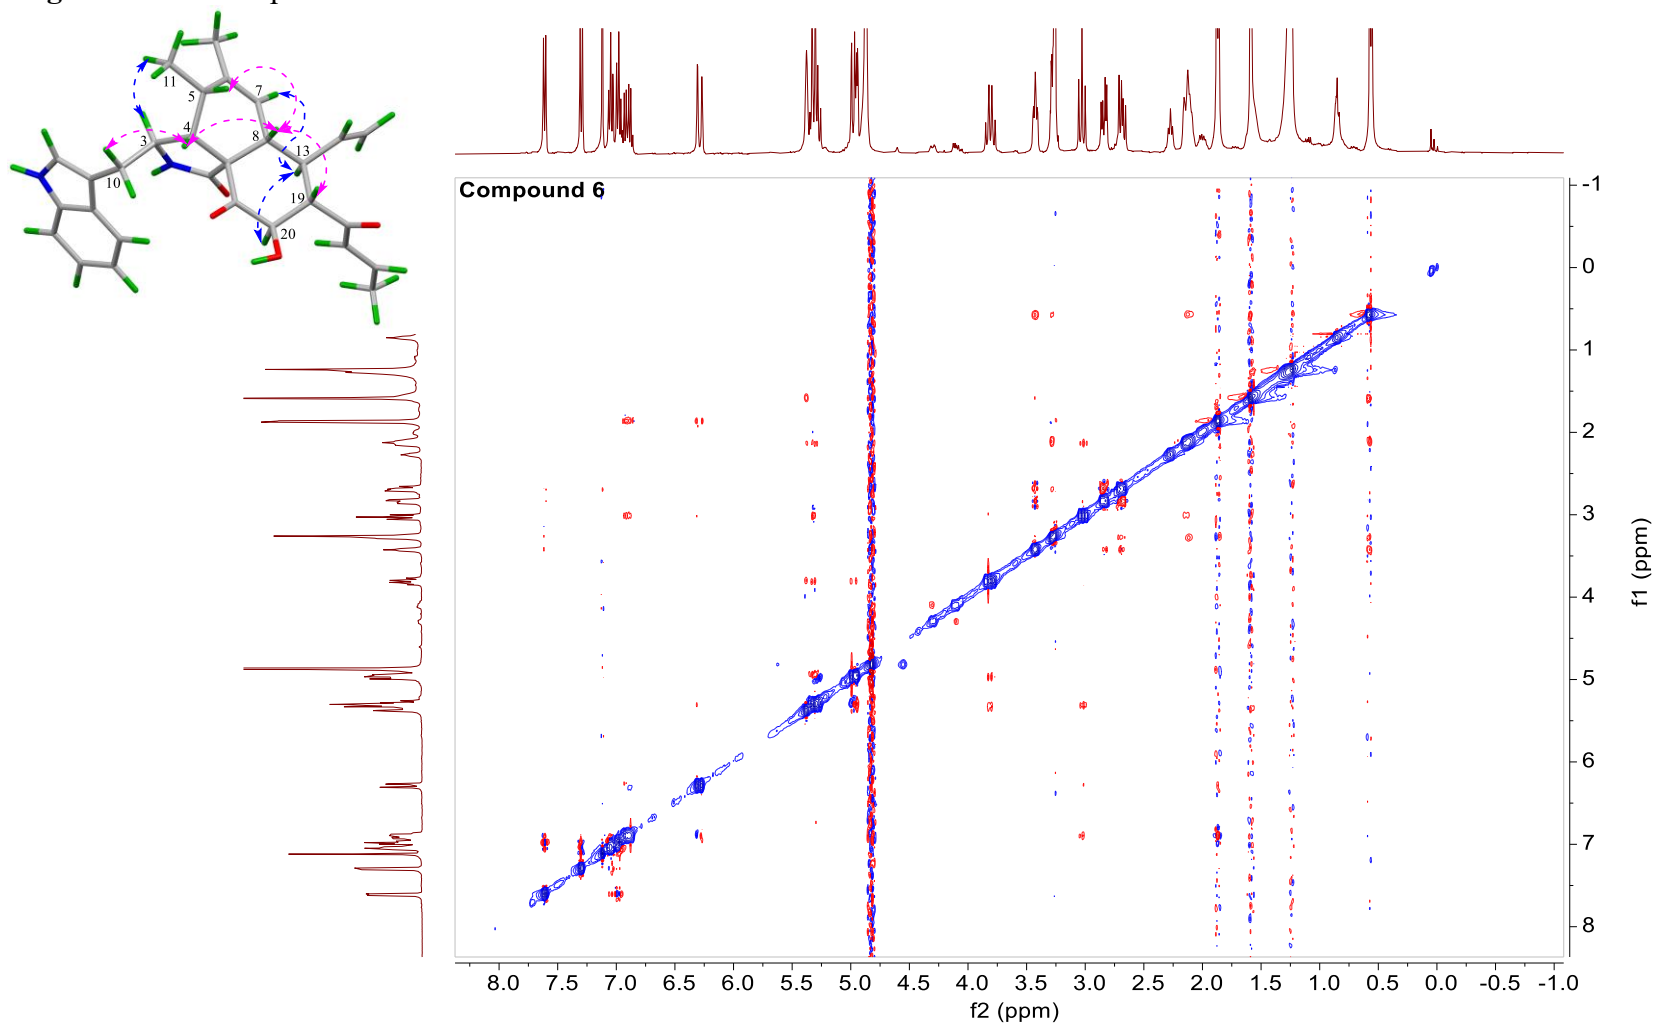

**Fig. S79.** HRESIMS (+) spectrum of **6**.

pss-100 #1-101 RT: 0.01-2.99 AV: 101 NL: 1.44E5  
T: FTMS + p ESI Full ms [100.00-1000.00]

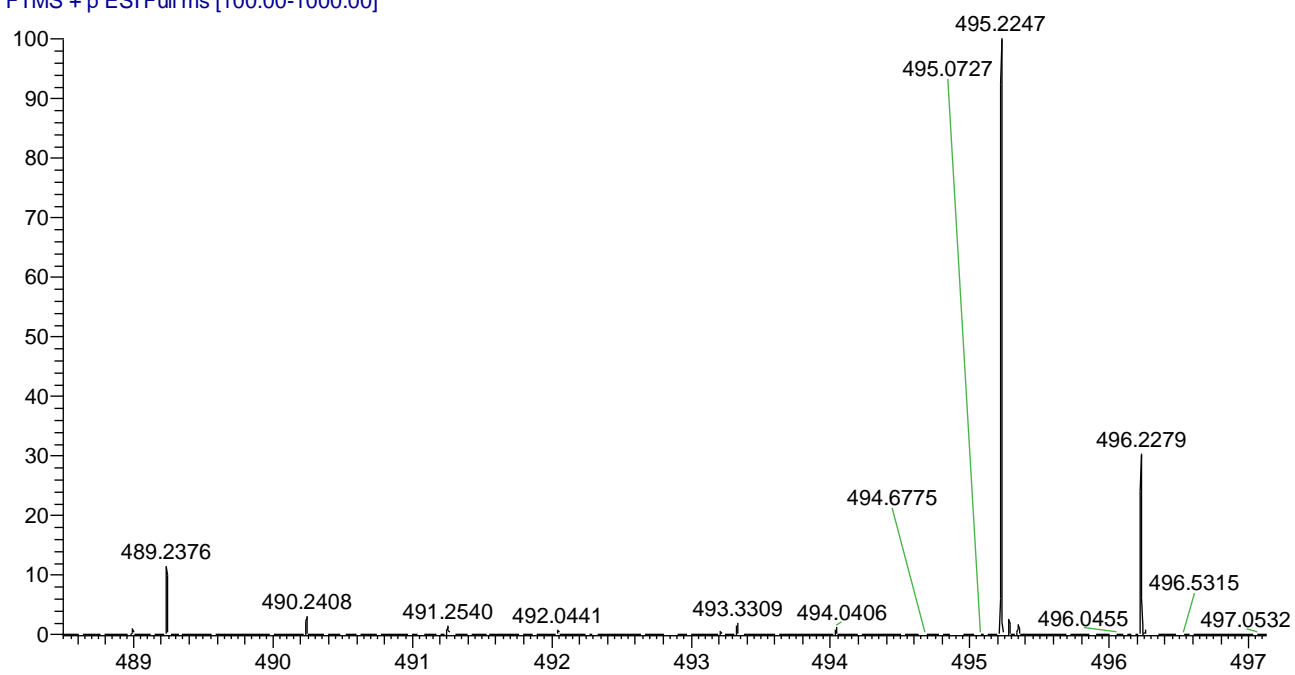



Fig. S80. UV spectrum of **6**.

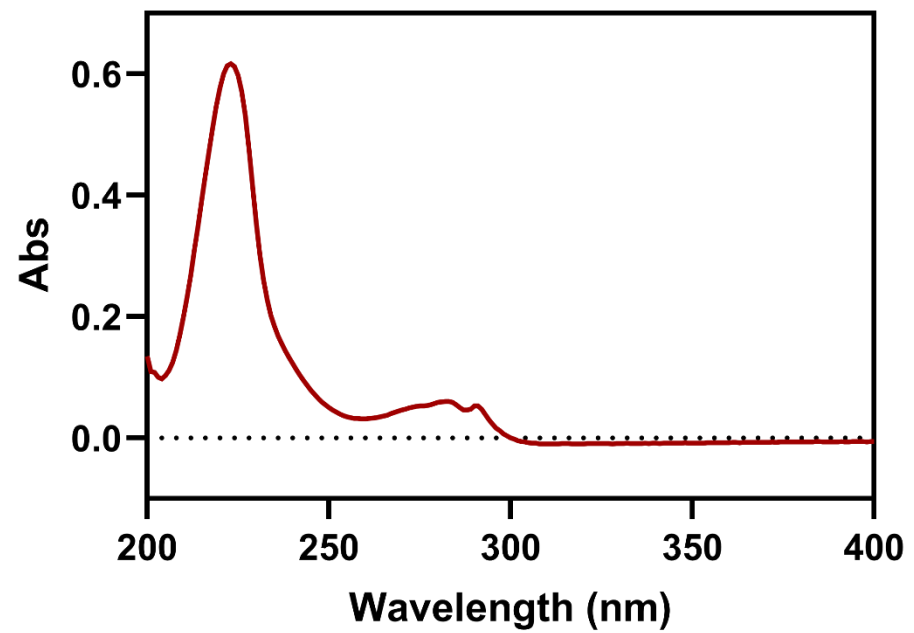

Fig. S81. IR spectrum of **6**.

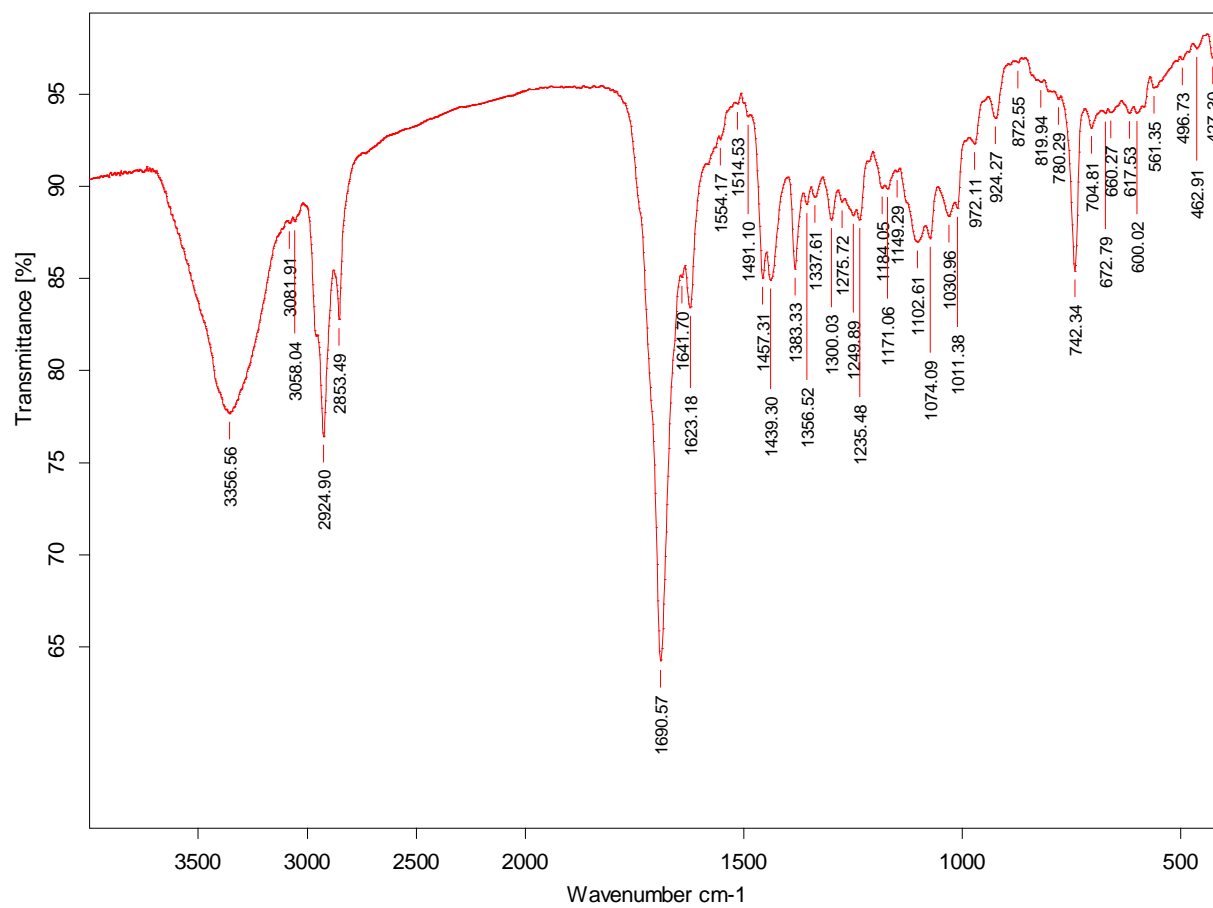

Fig. S82.  $^1\text{H}$  NMR (400 MHz,  $\text{CD}_3\text{OD}$ ) spectrum of *S*-MTPA esters of **6**.

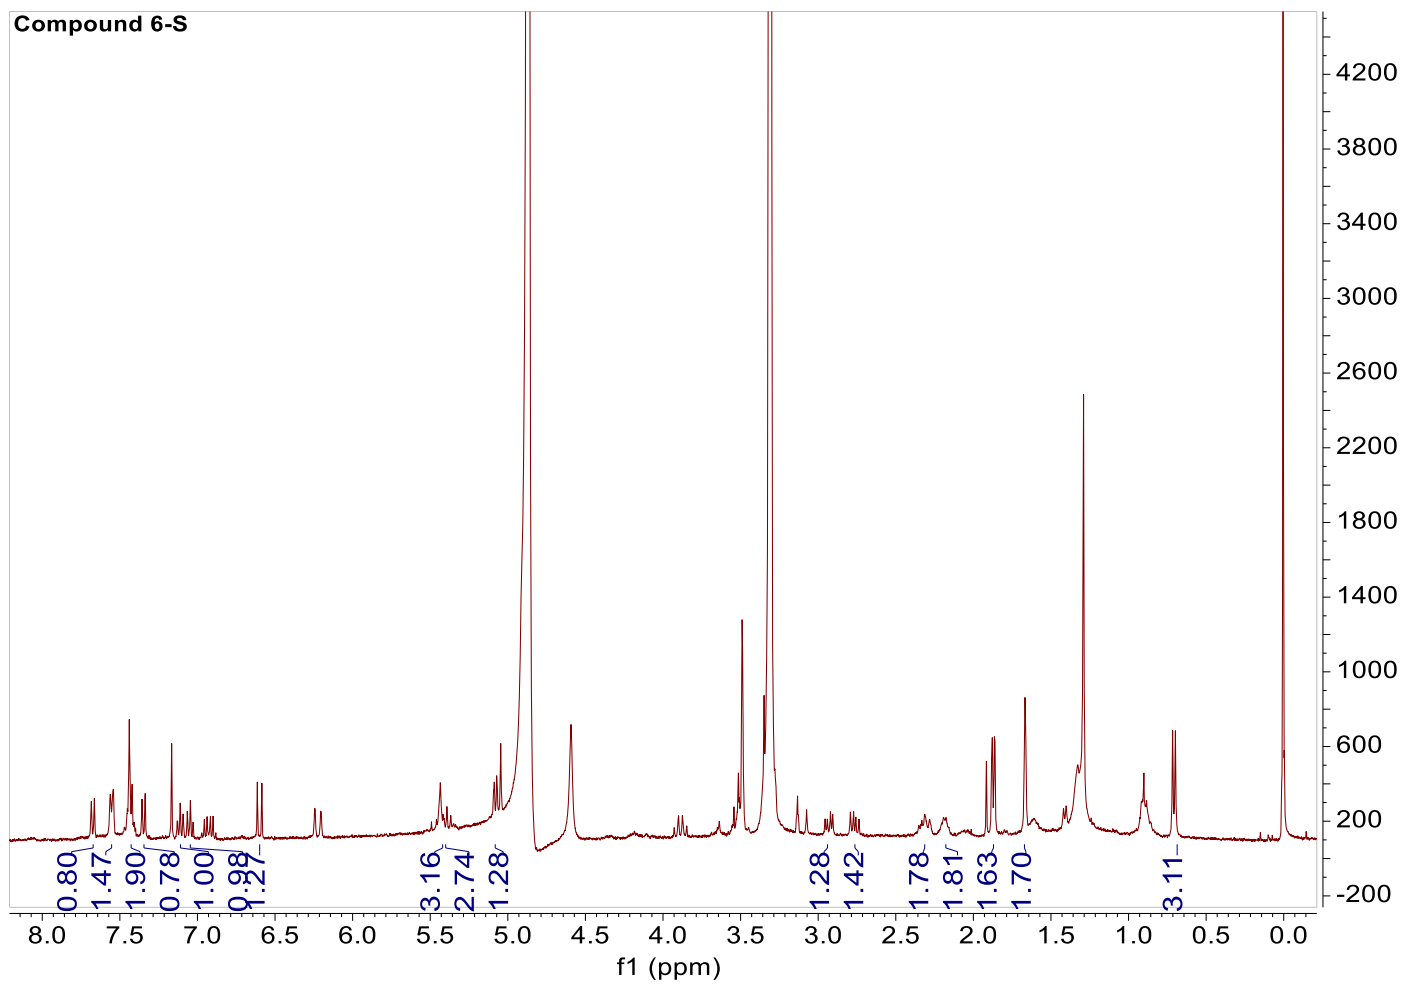

**Fig. S83.**  $^1\text{H}$  NMR (400 MHz,  $\text{CD}_3\text{OD}$ ) spectrum of *R*-MTPA esters of **6**.

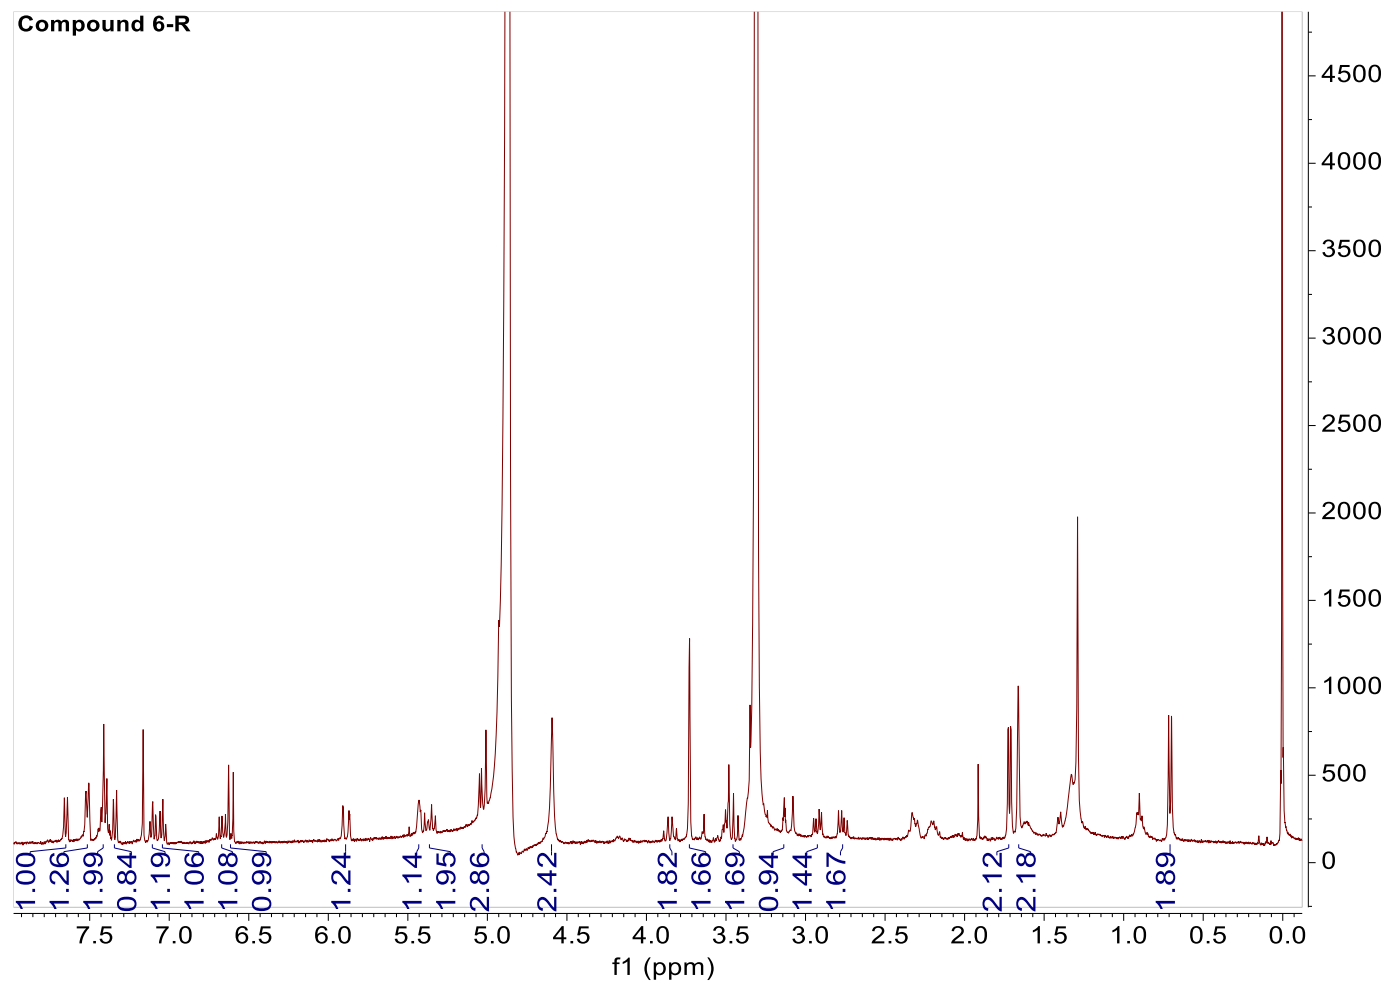

Supplement: d1qo01357b1.pdf [file d1qo01357b1.pdf]
